# Supplementary material
Source: PubMed Central journal article supplement (PMC3494186)
Supplement: supp_M112.019232_Supplemental_figure_1.pdf [file supp_M112.019232_Supplemental_figure_1.pdf]

**Supplemental Figure 1.** Spectra of proteins from HLA-DR7 and HLA-DR7/Ii<sup>+</sup> cells identified by a single peptide.

# FSITYKPVKHGRPGIGATHSSRF

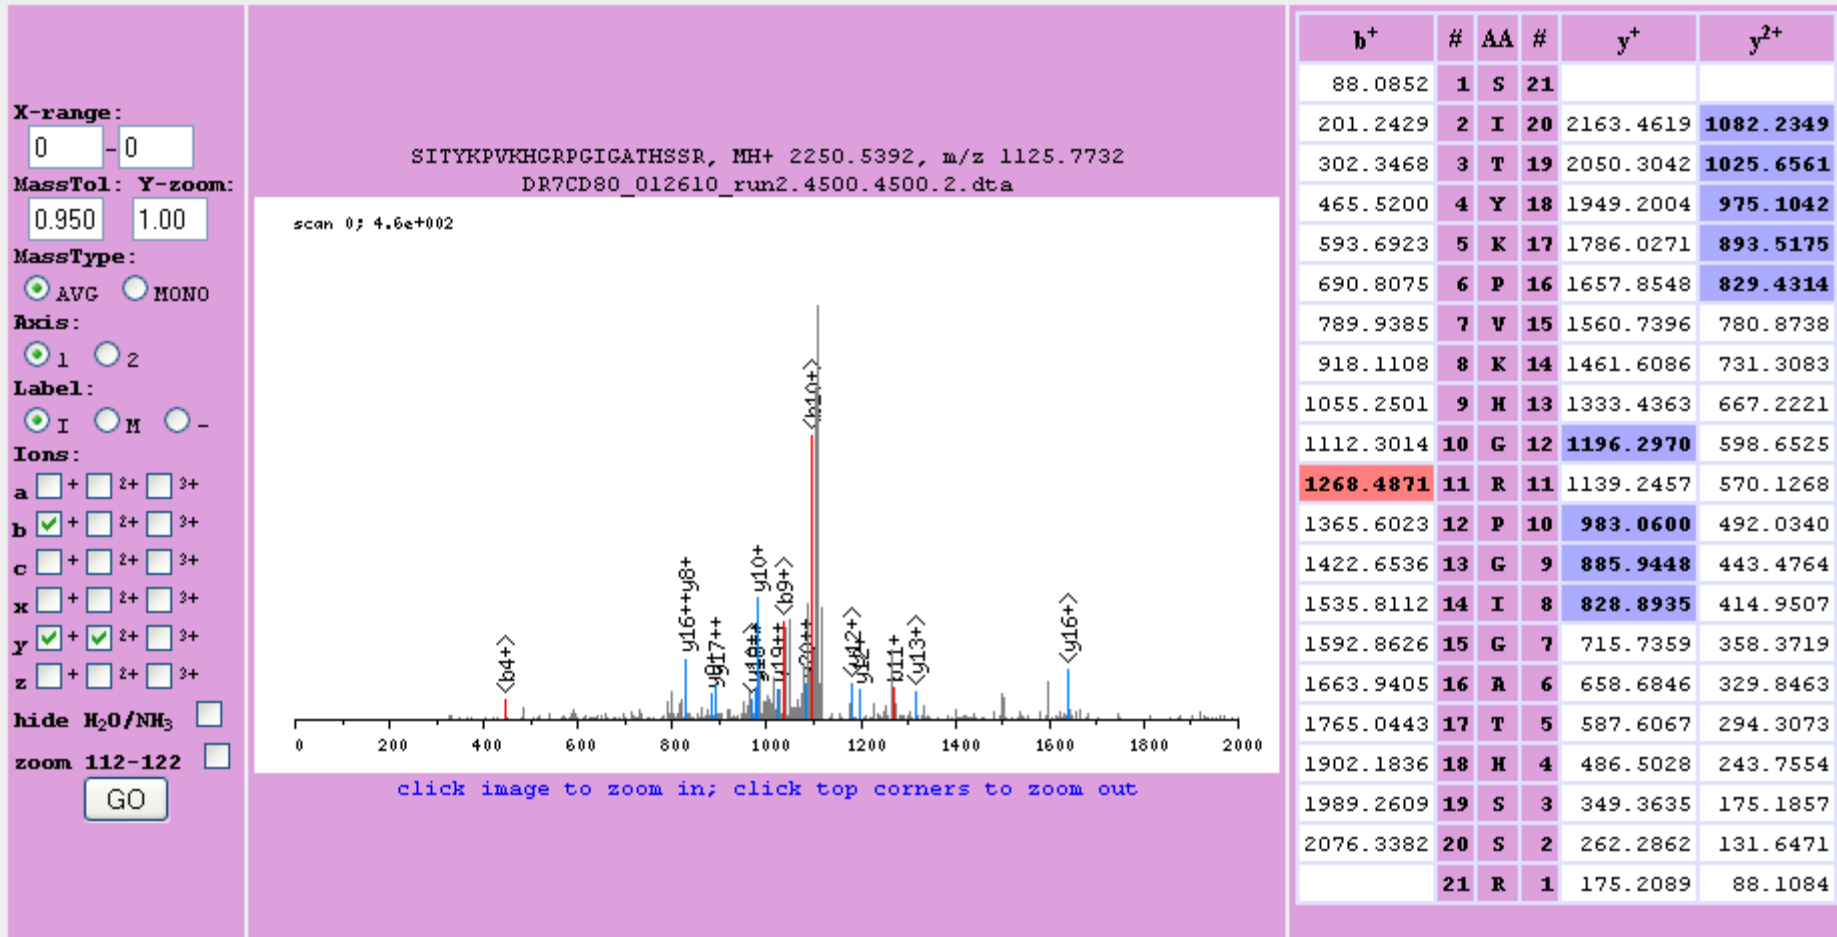

# KKAPAQKVPAQKATGQKA

**X-range:**  
 -

**MassTol:**  **Y-zoom:**

**MassType:**  
 AVG  MONO

**Axis:**  
 1  2

**Label:**  
 I  M  -

**Ions:**

a  +  2+  3+

b  +  2+  3+

c  +  2+  3+

x  +  2+  3+

y  +  2+  3+

z  +  2+  3+

hide H<sub>2</sub>O/NH<sub>3</sub>

zoom 112-122

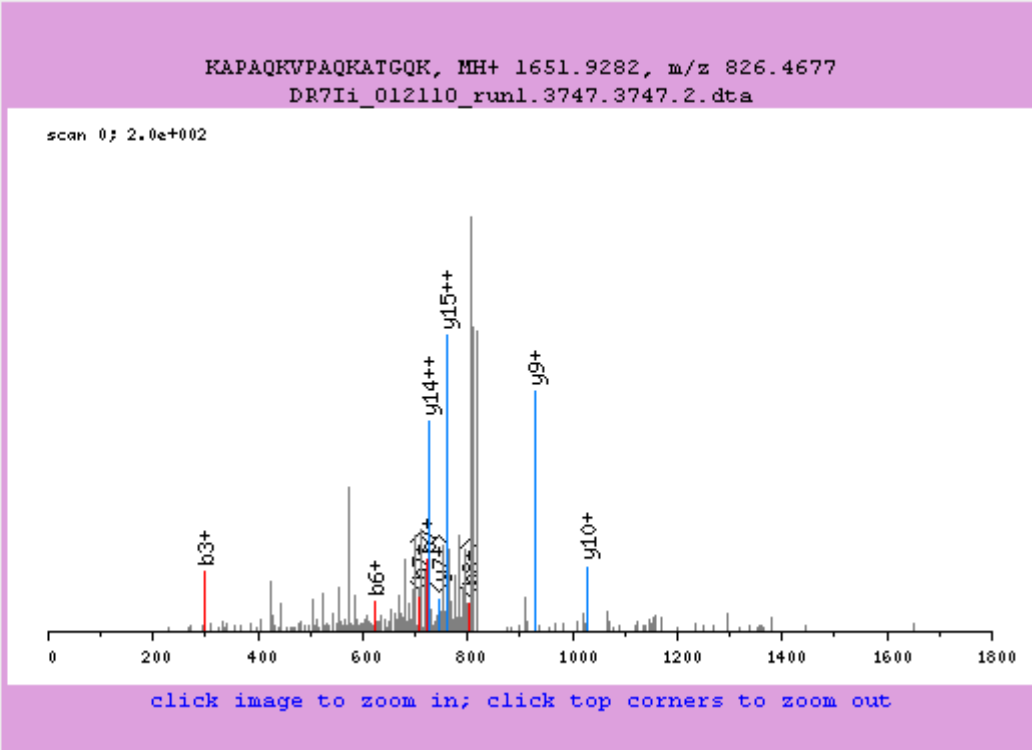

| b <sup>+</sup> | #  | AA | #  | y <sup>+</sup> | y <sup>2+</sup> |
|----------------|----|----|----|----------------|-----------------|
| 129.1802       | 1  | K  | 16 |                |                 |
| 200.2581       | 2  | R  | 15 | 1523.7559      | 762.3819        |
| 297.3733       | 3  | P  | 14 | 1452.6780      | 726.8430        |
| 368.4512       | 4  | R  | 13 | 1355.5629      | 678.2854        |
| 496.5804       | 5  | Q  | 12 | 1284.4850      | 642.7465        |
| 624.7527       | 6  | K  | 11 | 1156.3557      | 578.6818        |
| 723.8838       | 7  | V  | 10 | 1028.1835      | 514.5957        |
| 820.9989       | 8  | P  | 9  | 929.0524       | 465.0302        |
| 892.0768       | 9  | R  | 8  | 831.9372       | 416.4726        |
| 1020.2061      | 10 | Q  | 7  | 760.8593       | 380.9336        |
| 1148.3783      | 11 | K  | 6  | 632.7301       | 316.8690        |
| 1219.4562      | 12 | R  | 5  | 504.5578       | 252.7829        |
| 1320.5601      | 13 | T  | 4  | 433.4799       | 217.2439        |
| 1377.6114      | 14 | G  | 3  | 332.3760       | 166.6920        |
| 1505.7407      | 15 | Q  | 2  | 275.3247       | 138.1663        |
|                | 16 | K  | 1  | 147.1955       | 74.1017         |

# KSSQPLASKQEKDGTEKRS

**X-range:**  
 -   
**MassTol:**  **Y-zoom:**   
**MassType:**  
 AVG  MONO  
**Axis:**  
 1  2  
**Label:**  
 I  M  -  
**Ions:**  
a  +  2+  3+  
b  +  2+  3+  
c  +  2+  3+  
x  +  2+  3+  
Y  +  2+  3+  
z  +  2+  3+  
 hide H<sub>2</sub>O/NH<sub>3</sub>  
**zoom**

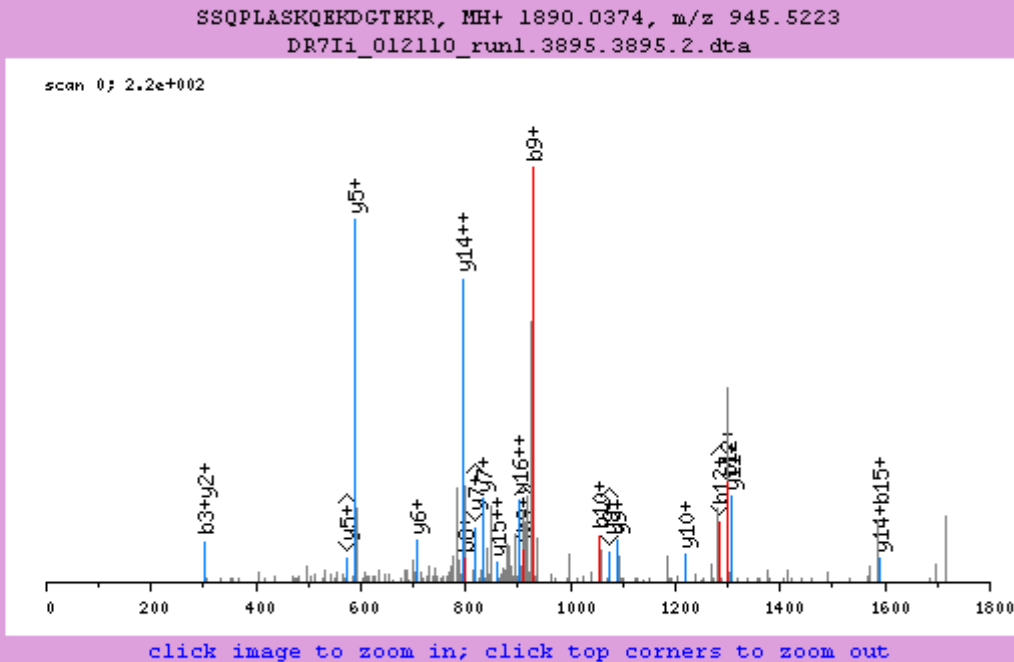

| b <sup>+</sup> | #  | AA | #  | y <sup>+</sup> | y <sup>2+</sup> |
|----------------|----|----|----|----------------|-----------------|
| 88.0852        | 1  | S  | 17 |                |                 |
| 175.1625       | 2  | S  | 16 | 1802.9601      | 901.9840        |
| 303.2918       | 3  | Q  | 15 | 1715.8828      | 858.4454        |
| 400.4069       | 4  | P  | 14 | 1587.7535      | 794.3807        |
| 513.5646       | 5  | L  | 13 | 1490.6384      | 745.8232        |
| 584.6425       | 6  | R  | 12 | 1377.4807      | 689.2443        |
| 671.7198       | 7  | S  | 11 | 1306.4028      | 653.7054        |
| 799.8921       | 8  | K  | 10 | 1219.3255      | 610.1667        |
| 928.0213       | 9  | Q  | 9  | 1091.1532      | 546.0806        |
| 1057.1353      | 10 | E  | 8  | 963.0240       | 482.0160        |
| 1185.3075      | 11 | K  | 7  | 833.9100       | 417.4590        |
| 1300.3949      | 12 | D  | 6  | 705.7378       | 353.3729        |
| 1357.4463      | 13 | G  | 5  | 590.6504       | 295.8292        |
| 1458.5501      | 14 | T  | 4  | 533.5990       | 267.3035        |
| 1587.6641      | 15 | E  | 3  | 432.4952       | 216.7516        |
| 1715.8364      | 16 | K  | 2  | 303.3812       | 152.1946        |
|                | 17 | R  | 1  | 175.2089       | 88.1084         |



# MFQYNSTHGKFGHTVKA

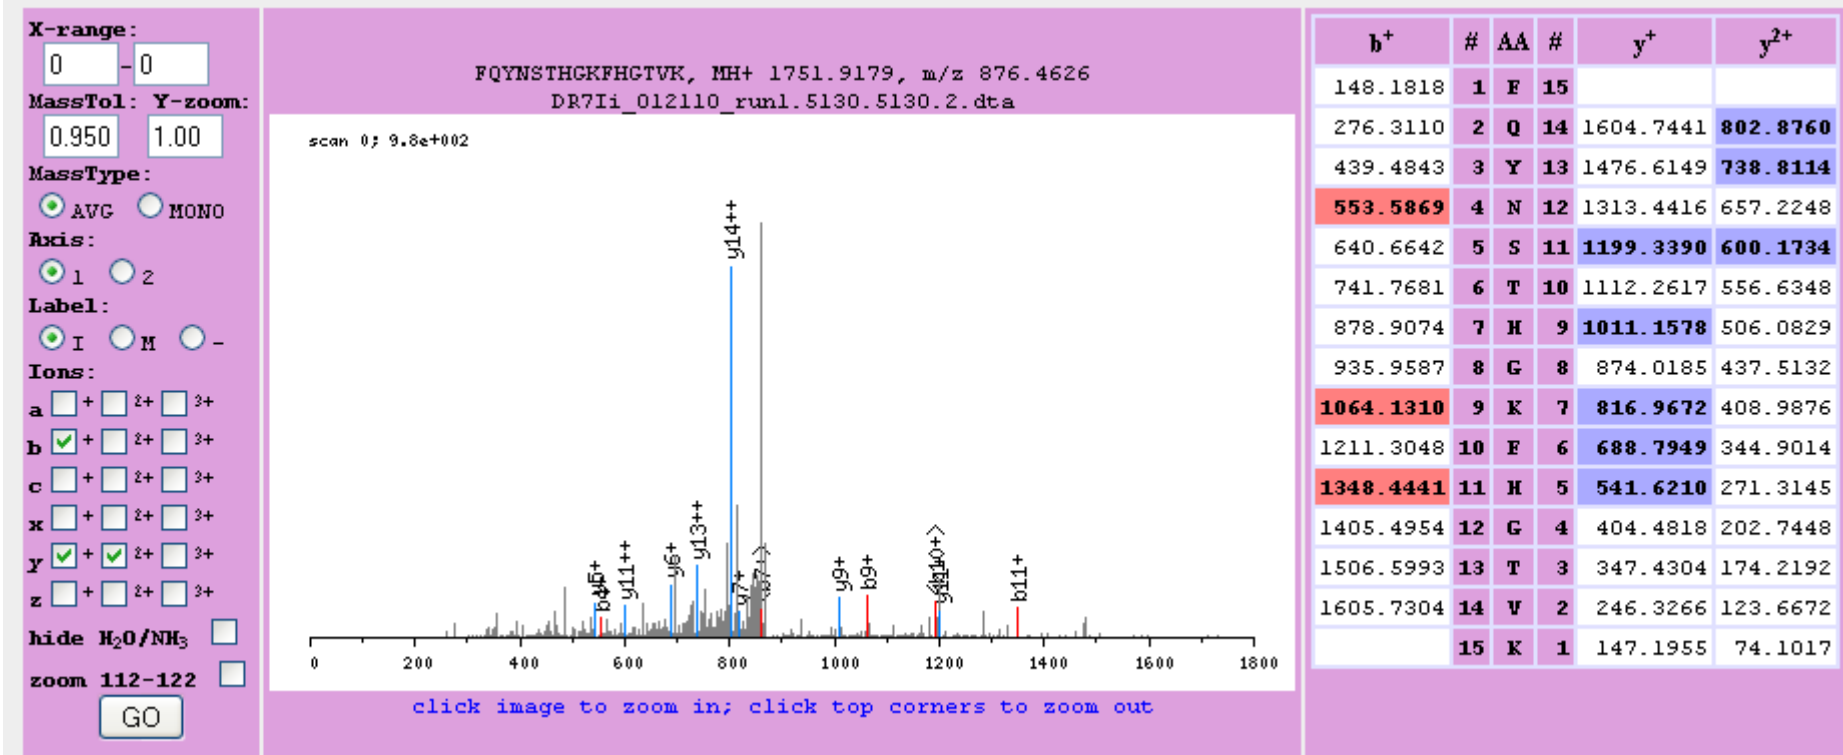

# LYLKVKGNVFKNKRIIL

**X-range:**  
 -

**MassTol:**  **Y-zoom:**

**MassType:**  
 AVG  MONO

**Axis:**  
 1  2

**Label:**  
 I  M  -

**Ions:**  
 a  +  2+  3+  
 b  +  2+  3+  
 c  +  2+  3+  
 x  +  2+  3+  
 y  +  2+  3+  
 z  +  2+  3+

**hide** H<sub>2</sub>O/NH<sub>3</sub>

**zoom** 112-122

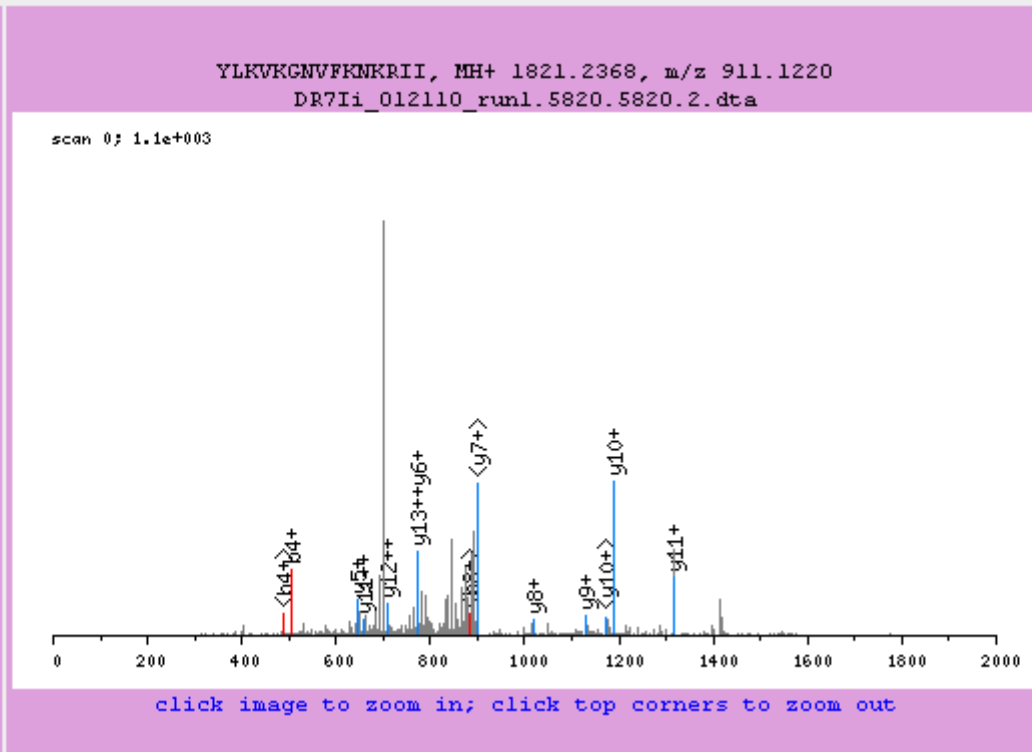

| b <sup>+</sup>  | #  | AA | #  | y <sup>+</sup>   | y <sup>2+</sup> |
|-----------------|----|----|----|------------------|-----------------|
| 164.1812        | 1  | Y  | 15 |                  |                 |
| 277.3388        | 2  | L  | 14 | 1658.0635        | 829.5357        |
| 405.5111        | 3  | K  | 13 | 1544.9059        | <b>772.9569</b> |
| <b>504.6422</b> | 4  | V  | 12 | 1416.7336        | <b>708.8708</b> |
| 632.8145        | 5  | K  | 11 | <b>1317.6025</b> | <b>659.3052</b> |
| 689.8658        | 6  | G  | 10 | <b>1189.4303</b> | 595.2191        |
| 803.9684        | 7  | N  | 9  | <b>1132.3789</b> | 566.6934        |
| 903.0995        | 8  | V  | 8  | <b>1018.2763</b> | 509.6421        |
| 1050.2733       | 9  | F  | 7  | 919.1452         | 460.0766        |
| 1178.4456       | 10 | K  | 6  | <b>771.9714</b>  | 386.4897        |
| 1292.5483       | 11 | N  | 5  | <b>643.7991</b>  | 322.4035        |
| 1420.7205       | 12 | K  | 4  | 529.6965         | 265.3522        |
| 1576.9062       | 13 | R  | 3  | 401.5242         | 201.2661        |
| 1690.0639       | 14 | I  | 2  | 245.3385         | 123.1732        |
|                 | 15 | I  | 1  | 132.1809         | 66.5944         |

# LAADKQTLQSEQPLQVARC

**X-range:**  
 -

**MassTol:**  **Y-zoom:**

**MassType:**  
 AVG  MONO

**Axis:**  
 1  2

**Label:**  
 I  M  -

**Ions:**

a  +  2+  3+

b  +  2+  3+

c  +  2+  3+

x  +  2+  3+

y  +  2+  3+

z  +  2+  3+

hide H<sub>2</sub>O/NH<sub>3</sub>

zoom 112-122

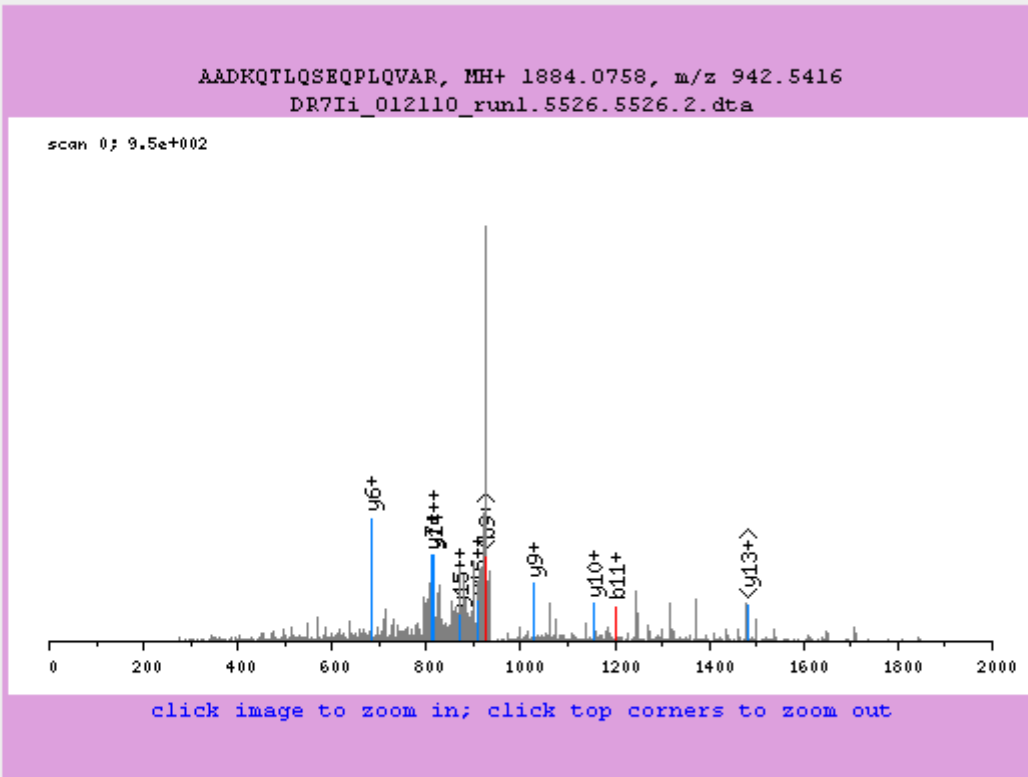

| b <sup>+</sup> | #  | AA | #  | y <sup>+</sup> | y <sup>2+</sup> |
|----------------|----|----|----|----------------|-----------------|
| 72.0858        | 1  | R  | 17 |                |                 |
| 143.1637       | 2  | R  | 16 | 1812.9979      | 907.0029        |
| 258.2511       | 3  | D  | 15 | 1741.9200      | 871.4640        |
| 386.4234       | 4  | K  | 14 | 1626.8326      | 813.9203        |
| 514.5526       | 5  | Q  | 13 | 1498.6604      | 749.8342        |
| 615.6565       | 6  | T  | 12 | 1370.5311      | 685.7695        |
| 728.8142       | 7  | L  | 11 | 1269.4273      | 635.2176        |
| 856.9434       | 8  | Q  | 10 | 1156.2696      | 578.6388        |
| 944.0207       | 9  | S  | 9  | 1028.1404      | 514.5742        |
| 1073.1347      | 10 | E  | 8  | 941.0631       | 471.0355        |
| 1201.2639      | 11 | Q  | 7  | 811.9491       | 406.4785        |
| 1298.3791      | 12 | P  | 6  | 683.8199       | 342.4139        |
| 1411.5367      | 13 | L  | 5  | 586.7047       | 293.8563        |
| 1539.6659      | 14 | Q  | 4  | 473.5471       | 237.2775        |
| 1638.7970      | 15 | V  | 3  | 345.4179       | 173.2129        |
| 1709.8749      | 16 | R  | 2  | 246.2868       | 123.6474        |
|                | 17 | R  | 1  | 175.2089       | 88.1084         |



# FNQVEIKPEMIGHYLGEFS

X-range:  -

MassTol: Y-zoom:

MassType:  
 AVG  MONO

Axis:  
 1  2

Label:  
 I  M  -

Ions:  
a  +  2+  3+  
b  +  2+  3+  
c  +  2+  3+  
x  +  2+  3+  
y  +  2+  3+  
z  +  2+  3+

hide H<sub>2</sub>O/NH<sub>3</sub>

zoom 112-122

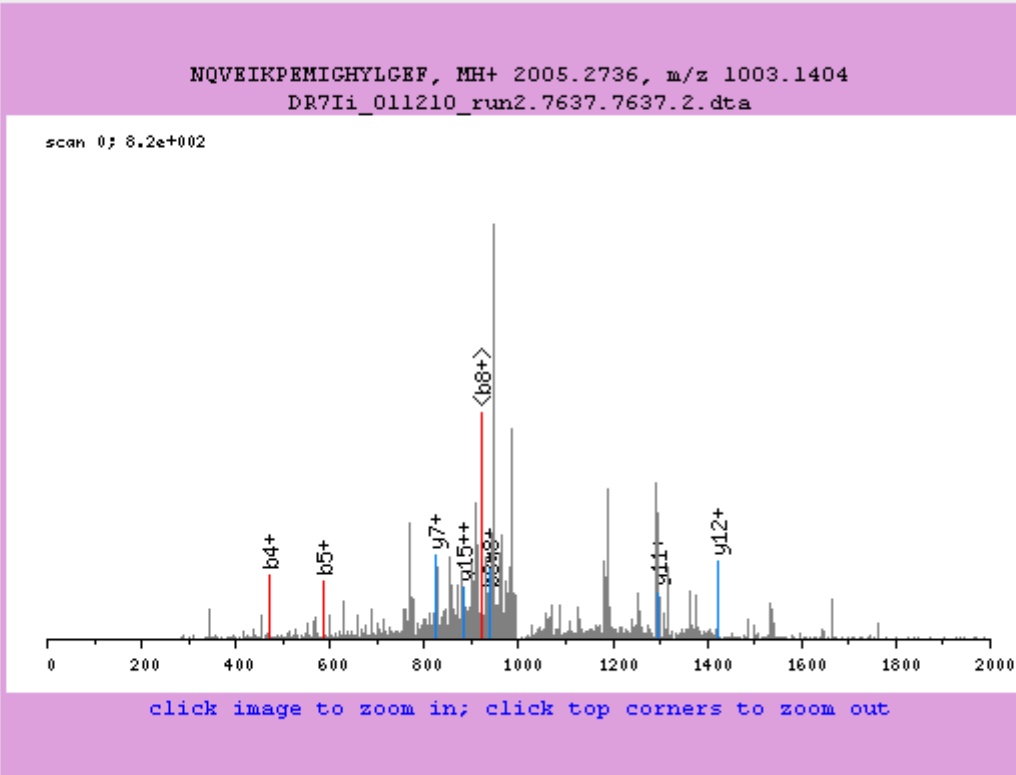

| b <sup>+</sup> | #  | AA | #  | y <sup>+</sup> | y <sup>2+</sup> |
|----------------|----|----|----|----------------|-----------------|
| 115.1106       | 1  | N  | 17 |                |                 |
| 243.2398       | 2  | Q  | 16 | 1891.1709      | 946.0894        |
| 342.3709       | 3  | V  | 15 | 1763.0417      | 882.0248        |
| 471.4848       | 4  | E  | 14 | 1663.9106      | 832.4593        |
| 584.6425       | 5  | I  | 13 | 1534.7967      | 767.9023        |
| 712.8148       | 6  | K  | 12 | 1421.6390      | 711.3235        |
| 809.9299       | 7  | P  | 11 | 1293.4667      | 647.2373        |
| 939.0439       | 8  | E  | 10 | 1196.3516      | 598.6798        |
| 1070.2400      | 9  | M  | 9  | 1067.2376      | 534.1228        |
| 1183.3976      | 10 | I  | 8  | 936.0415       | 468.5247        |
| 1240.4489      | 11 | G  | 7  | 822.8839       | 411.9459        |
| 1377.5882      | 12 | H  | 6  | 765.8326       | 383.4202        |
| 1540.7615      | 13 | Y  | 5  | 628.6933       | 314.8506        |
| 1653.9191      | 14 | L  | 4  | 465.5200       | 233.2640        |
| 1710.9704      | 15 | G  | 3  | 352.3624       | 176.6852        |
| 1840.0844      | 16 | E  | 2  | 295.3111       | 148.1595        |
|                | 17 | F  | 1  | 166.1971       | 83.6025         |

# YYQKYVDEASKKEIKDILI

**X-range:**  
 -   
**MassTol:** **Y-zoom:**  
   
**MassType:**  
 AVG  MONO  
**Axis:**  
 1  2  
**Label:**  
 I  M  -  
**Ions:**  
**a**  +  2+  3+  
**b**  +  2+  3+  
**c**  +  2+  3+  
**x**  +  2+  3+  
**y**  +  2+  3+  
**z**  +  2+  3+  
**hide H<sub>2</sub>O/NH<sub>3</sub>**   
**zoom 112-122**

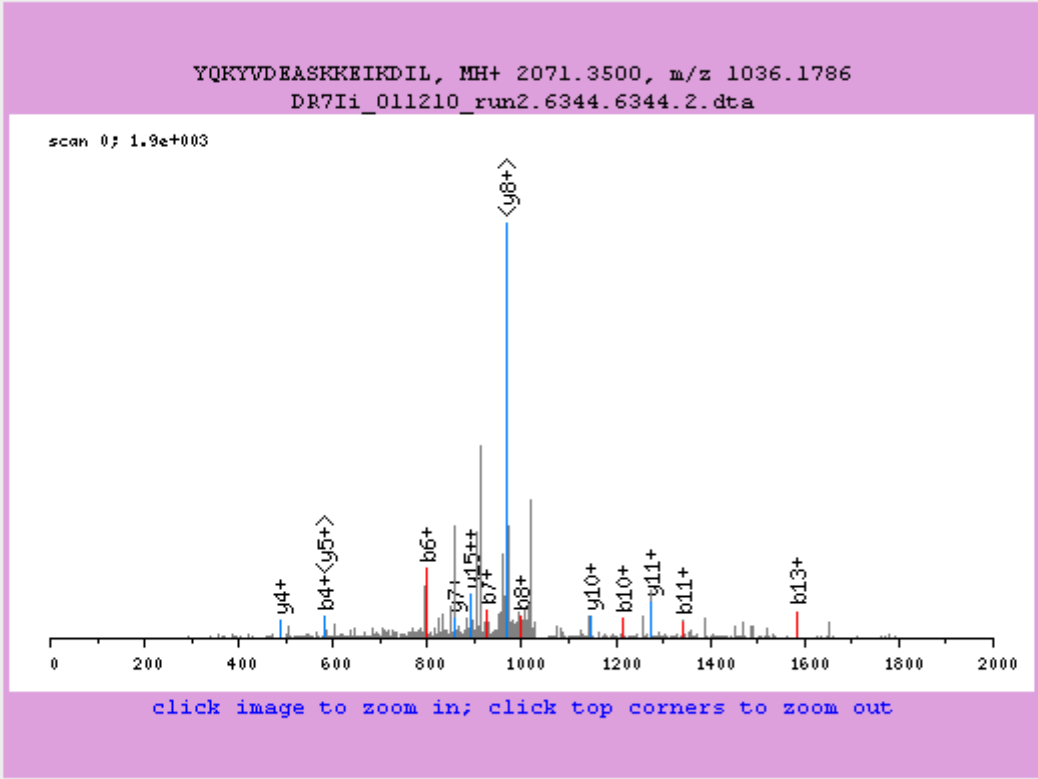

| $b^+$     | #  | AA | #  | $y^+$     | $y^{2+}$ |
|-----------|----|----|----|-----------|----------|
| 164.1812  | 1  | Y  | 17 |           |          |
| 292.3104  | 2  | Q  | 16 | 1908.1768 | 954.5923 |
| 420.4827  | 3  | K  | 15 | 1780.0475 | 890.5277 |
| 583.6560  | 4  | Y  | 14 | 1651.8753 | 826.4416 |
| 682.7870  | 5  | V  | 13 | 1488.7020 | 744.8550 |
| 797.8744  | 6  | D  | 12 | 1389.5709 | 695.2894 |
| 926.9884  | 7  | E  | 11 | 1274.4835 | 637.7457 |
| 998.0663  | 8  | R  | 10 | 1145.3696 | 573.1887 |
| 1085.1436 | 9  | S  | 9  | 1074.2917 | 537.6498 |
| 1213.3159 | 10 | K  | 8  | 987.2144  | 494.1111 |
| 1341.4882 | 11 | K  | 7  | 859.0421  | 430.0250 |
| 1470.6021 | 12 | E  | 6  | 730.8698  | 365.9389 |
| 1583.7598 | 13 | I  | 5  | 601.7558  | 301.3819 |
| 1711.9321 | 14 | K  | 4  | 488.5982  | 244.8031 |
| 1827.0195 | 15 | D  | 3  | 360.4259  | 180.7169 |
| 1940.1771 | 16 | I  | 2  | 245.3385  | 123.1732 |
|           | 17 | L  | 1  | 132.1809  | 66.5944  |

# EIAIIPSKKLRNKIAGYVTHLM

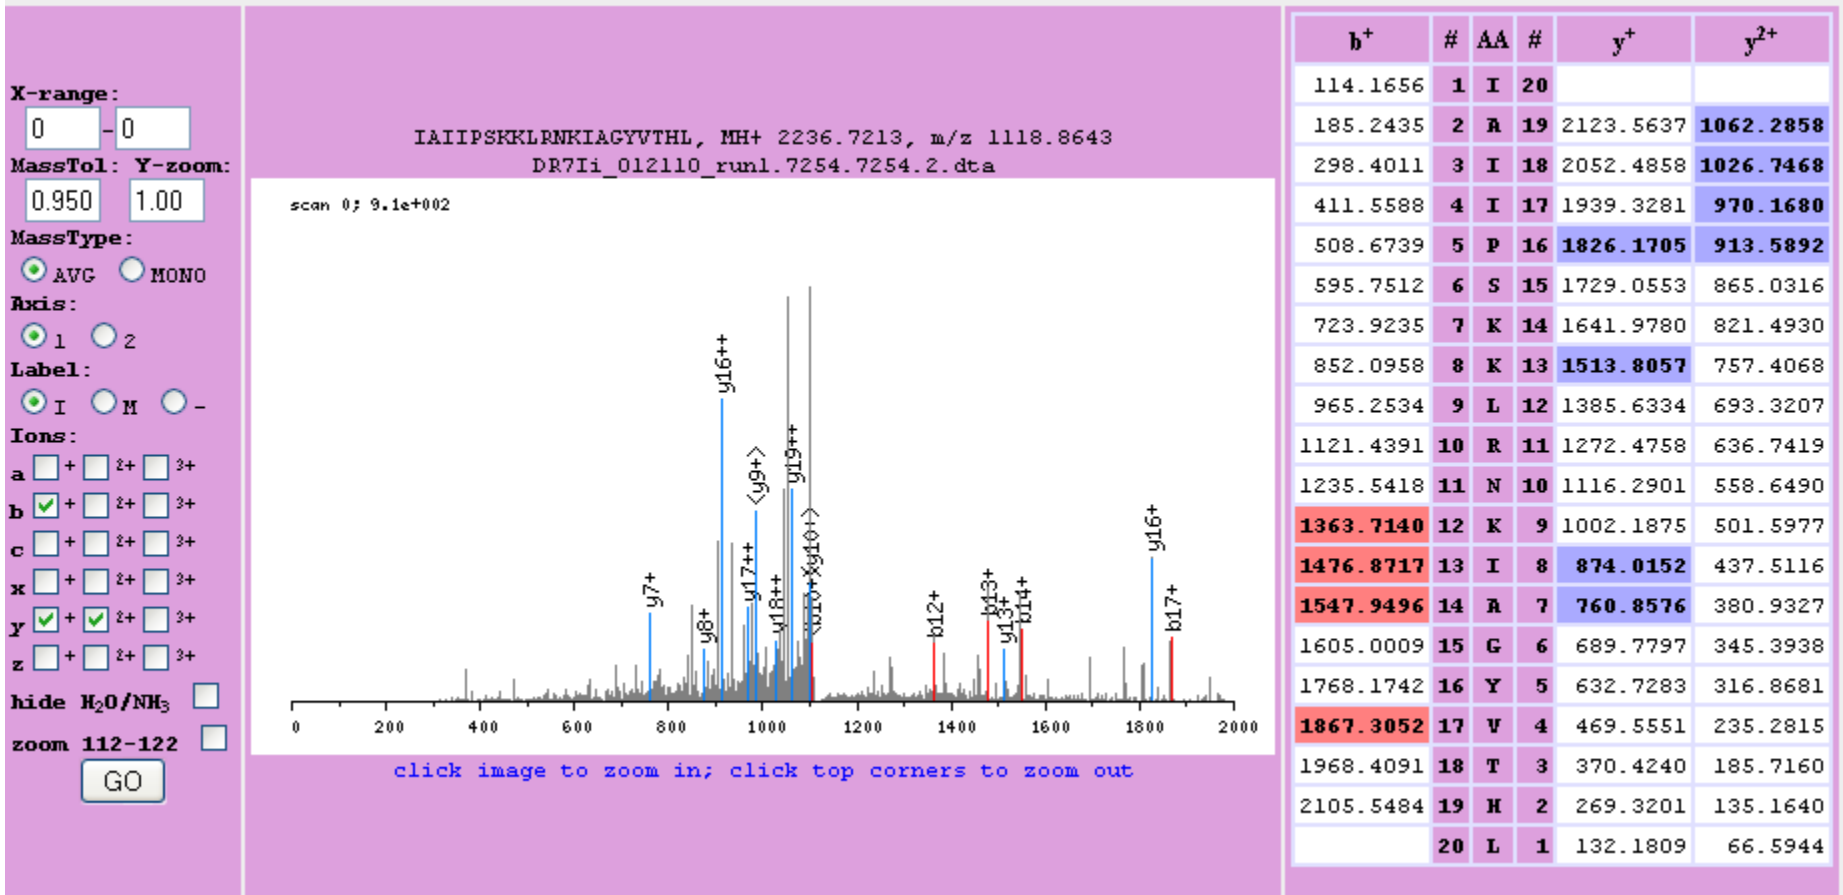

# MPGVTVKDVNQQEF

**X-range:** 0 - 0

**MassTol:** 0.950 **Y-zoom:** 1.00

**MassType:**  
 AVG  MONO

**Axis:**  
 1  2

**Label:**  
 I  M  -

**Ions:**

a  +  2+  3+

b  +  2+  3+

c  +  2+  3+

x  +  2+  3+

y  +  2+  3+

z  +  2+  3+

hide H<sub>2</sub>O/NH<sub>3</sub>

zoom 112-122

**GO**

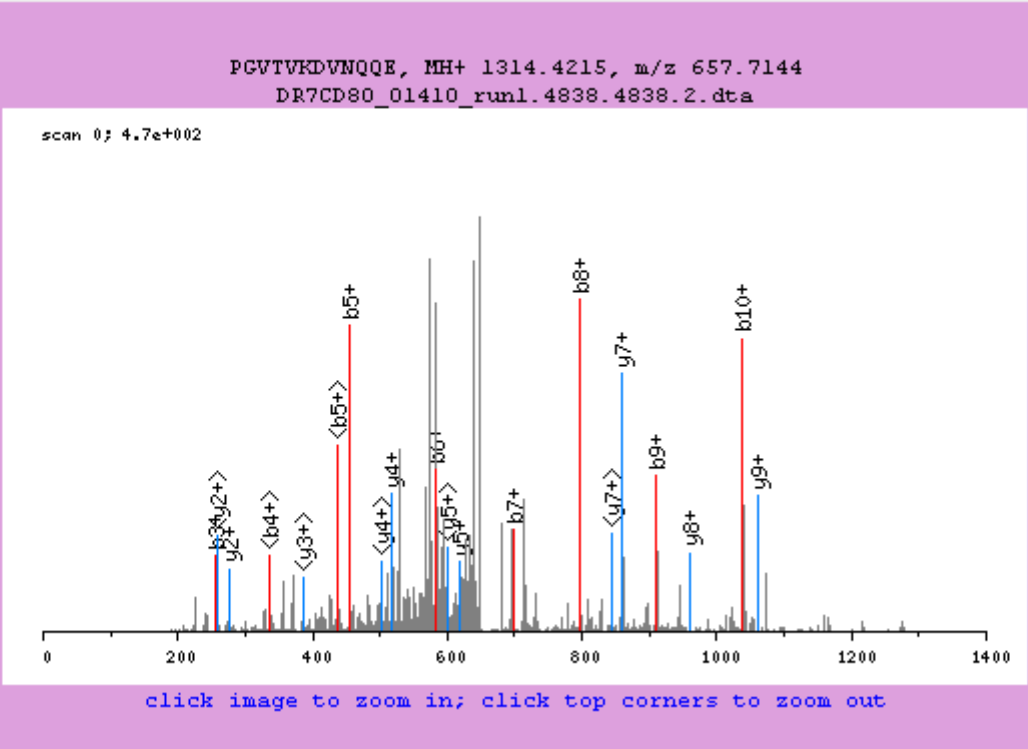

| b <sup>+</sup> | #  | AA | #  | y <sup>+</sup> | y <sup>2+</sup> |
|----------------|----|----|----|----------------|-----------------|
| 98.1231        | 1  | P  | 12 |                |                 |
| 155.1744       | 2  | G  | 11 | 1217.3063      | 609.1571        |
| 254.3055       | 3  | V  | 10 | 1160.2550      | 580.6315        |
| 355.4094       | 4  | T  | 9  | 1061.1240      | 531.0660        |
| 454.5404       | 5  | V  | 8  | 960.0201       | 480.5140        |
| 582.7127       | 6  | K  | 7  | 860.8890       | 430.9485        |
| 697.8001       | 7  | D  | 6  | 732.7167       | 366.8623        |
| 796.9312       | 8  | V  | 5  | 617.6293       | 309.3186        |
| 911.0338       | 9  | N  | 4  | 518.4983       | 259.7531        |
| 1039.1630      | 10 | Q  | 3  | 404.3956       | 202.7018        |
| 1167.2923      | 11 | Q  | 2  | 276.2664       | 138.6372        |
|                | 12 | E  | 1  | 148.1372       | 74.5726         |

# FTKSPYQEFTDHLVKTHTRV

X-range:  -

MassTol:  Y-zoom:

MassType:  AVG  MONO

Axis:  1  2

Label:  I  M  -

Ions:

a  +  2+  3+

b  +  2+  3+

c  +  2+  3+

x  +  2+  3+

y  +  2+  3+

z  +  2+  3+

hide H<sub>2</sub>O/NH<sub>3</sub>

zoom 112-122

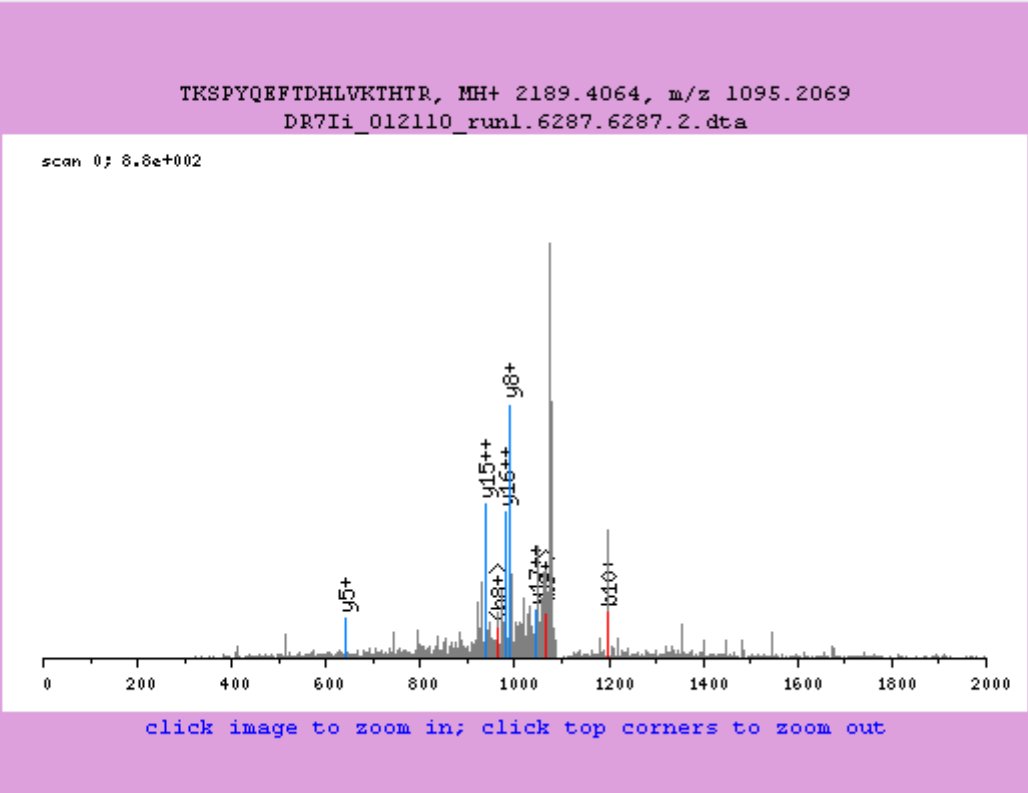

| b <sup>+</sup> | #  | AA | #  | y <sup>+</sup> | y <sup>2+</sup> |
|----------------|----|----|----|----------------|-----------------|
| 102.1118       | 1  | T  | 18 |                |                 |
| 230.2841       | 2  | K  | 17 | 2088.3026      | 1044.6552       |
| 317.3614       | 3  | S  | 16 | 1960.1303      | 980.5691        |
| 414.4766       | 4  | P  | 15 | 1873.0530      | 937.0305        |
| 577.6498       | 5  | Y  | 14 | 1775.9378      | 888.4729        |
| 705.7791       | 6  | Q  | 13 | 1612.7645      | 806.8862        |
| 834.8930       | 7  | E  | 12 | 1484.6353      | 742.8216        |
| 982.0669       | 8  | F  | 11 | 1355.5213      | 678.2646        |
| 1083.1708      | 9  | T  | 10 | 1208.3475      | 604.6777        |
| 1198.2582      | 10 | D  | 9  | 1107.2436      | 554.1258        |
| 1335.3975      | 11 | H  | 8  | 992.1562       | 496.5821        |
| 1448.5551      | 12 | L  | 7  | 855.0169       | 428.0124        |
| 1547.6862      | 13 | V  | 6  | 741.8593       | 371.4336        |
| 1675.8584      | 14 | K  | 5  | 642.7282       | 321.8681        |
| 1776.9623      | 15 | T  | 4  | 514.5559       | 257.7819        |
| 1914.1016      | 16 | H  | 3  | 413.4521       | 207.2300        |
| 2015.2055      | 17 | T  | 2  | 276.3128       | 138.6604        |
|                | 18 | R  | 1  | 175.2089       | 88.1084         |

# FILLPKDVEDESTGLEKIEKQLN

**X-range:**  
 -   
**MassTol:**  **Y-zoom:**   
**MassType:**  
 AVG  MONO  
**Axis:**  
 1  2  
**Label:**  
 I  M  -  
**Ions:**  
a  +  2+  3+  
b  +  2+  3+  
c  +  2+  3+  
x  +  2+  3+  
y  +  2+  3+  
z  +  2+  3+  
hide H<sub>2</sub>O/NH<sub>3</sub>   
zoom **112-122**

ILLPKDVEDESTGLEKIEKQL, MH+ 2398.7246, m/z 1199.8659  
 DR7Ii\_012110\_run1.7372.7372.2.dta

scan 0; 6.5e+002

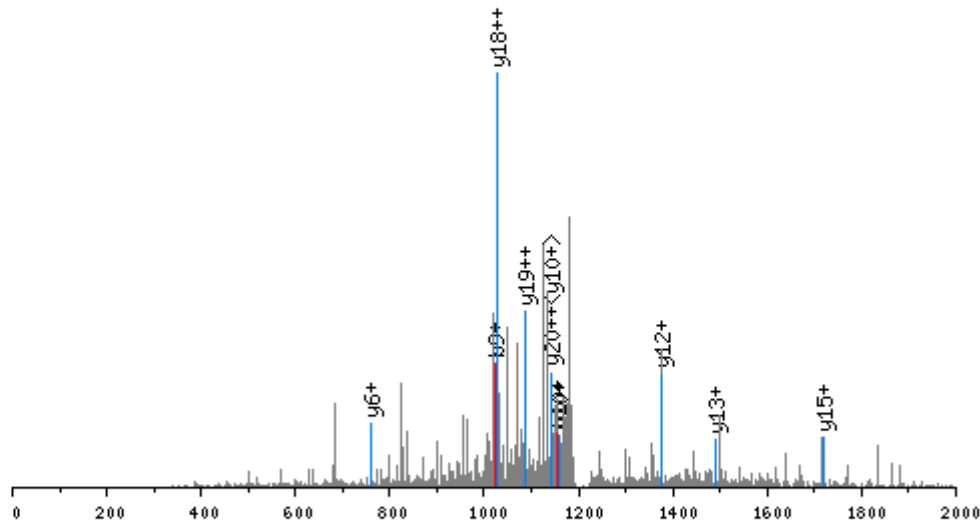

click image to zoom in; click top corners to zoom out

| b <sup>+</sup> | #  | AA | #  | y <sup>+</sup> | y <sup>2+</sup> |
|----------------|----|----|----|----------------|-----------------|
| 114.1656       | 1  | I  | 21 |                |                 |
| 227.3232       | 2  | L  | 20 | 2285.5669      | 1143.2874       |
| 340.4809       | 3  | L  | 19 | 2172.4093      | 1086.7086       |
| 437.5960       | 4  | P  | 18 | 2059.2517      | 1030.1298       |
| 565.7683       | 5  | K  | 17 | 1962.1365      | 981.5722        |
| 680.8557       | 6  | D  | 16 | 1833.9642      | 917.4861        |
| 779.9868       | 7  | V  | 15 | 1718.8768      | 859.9424        |
| 909.1008       | 8  | E  | 14 | 1619.7457      | 810.3768        |
| 1024.1882      | 9  | D  | 13 | 1490.6318      | 745.8198        |
| 1153.3021      | 10 | E  | 12 | 1375.5444      | 688.2761        |
| 1240.3794      | 11 | S  | 11 | 1246.4304      | 623.7192        |
| 1341.4833      | 12 | T  | 10 | 1159.3531      | 580.1805        |
| 1398.5346      | 13 | G  | 9  | 1058.2492      | 529.6286        |
| 1511.6923      | 14 | L  | 8  | 1001.1979      | 501.1029        |
| 1640.8063      | 15 | E  | 7  | 888.0402       | 444.5241        |
| 1768.9785      | 16 | K  | 6  | 758.9263       | 379.9671        |
| 1882.1362      | 17 | I  | 5  | 630.7540       | 315.8810        |
| 2011.2502      | 18 | E  | 4  | 517.5963       | 259.3021        |
| 2139.4224      | 19 | K  | 3  | 388.4824       | 194.7451        |
| 2267.5517      | 20 | Q  | 2  | 260.3101       | 130.6590        |
|                | 21 | L  | 1  | 132.1809       | 66.5944         |

# RRKEPKSQDIYLR

**X-range:**  
 -

**MassTol:** **Y-zoom:**

**MassType:**  
 AVG  MONO

**Axis:**  
 1  2

**Label:**  
 I  M  -

**Ions:**

a  +  2+  3+

b  +  2+  3+

c  +  2+  3+

x  +  2+  3+

y  +  2+  3+

z  +  2+  3+

hide H<sub>2</sub>O/NH<sub>3</sub>

zoom 112-122

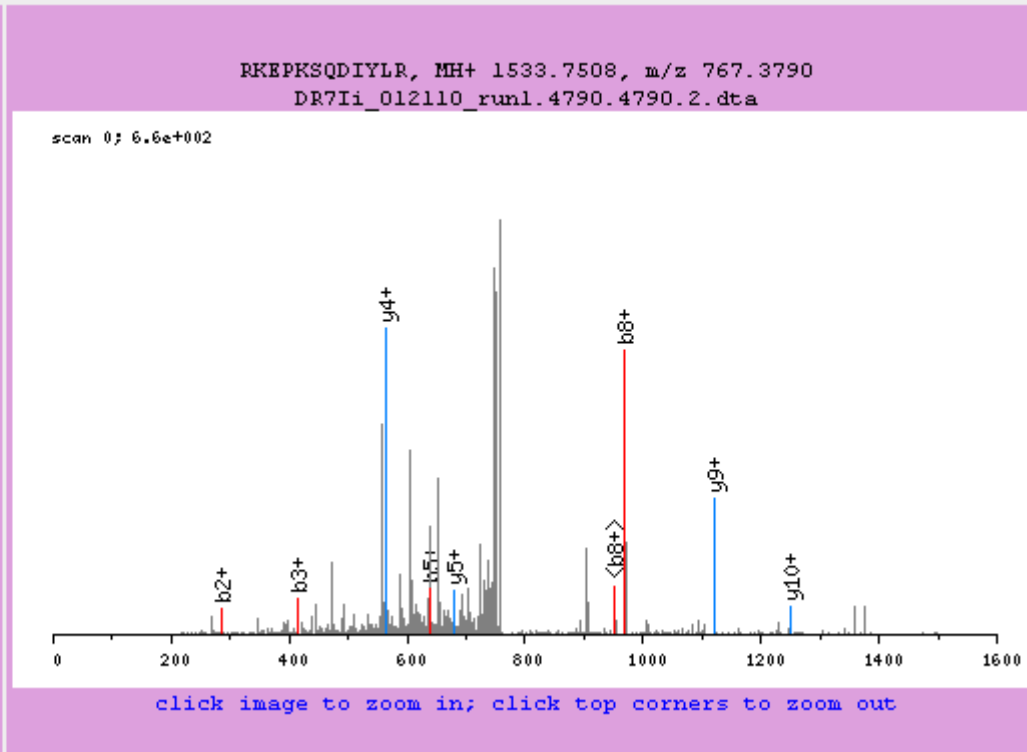

| b <sup>+</sup> | #  | AA | #  | y <sup>+</sup> | y <sup>2+</sup> |
|----------------|----|----|----|----------------|-----------------|
| 157.1936       | 1  | R  | 12 |                |                 |
| 285.3659       | 2  | K  | 11 | 1377.5651      | 689.2865        |
| 414.4799       | 3  | E  | 10 | 1249.3928      | 625.2004        |
| 511.5951       | 4  | P  | 9  | 1120.2788      | 560.6434        |
| 639.7673       | 5  | K  | 8  | 1023.1636      | 512.0858        |
| 726.8446       | 6  | S  | 7  | 894.9914       | 447.9996        |
| 854.9739       | 7  | Q  | 6  | 807.9141       | 404.4610        |
| 970.0613       | 8  | D  | 5  | 679.7848       | 340.3964        |
| 1083.2189      | 9  | I  | 4  | 564.6974       | 282.8527        |
| 1246.3922      | 10 | Y  | 3  | 451.5398       | 226.2739        |
| 1359.5498      | 11 | L  | 2  | 288.3665       | 144.6872        |
|                | 12 | R  | 1  | 175.2089       | 88.1084         |

# RDLRGKKKEELLKQLDDLK

**X-range:**  
 -

**MassTol:** **Y-zoom:**

**MassType:**  
 AVG  MONO

**Axis:**  
 1  2

**Label:**  
 I  M  -

**Ions:**

a  +  2+  3+

b  +  2+  3+

c  +  2+  3+

x  +  2+  3+

y  +  2+  3+

z  +  2+  3+

hide H<sub>2</sub>O/NH<sub>3</sub>

zoom 112-122

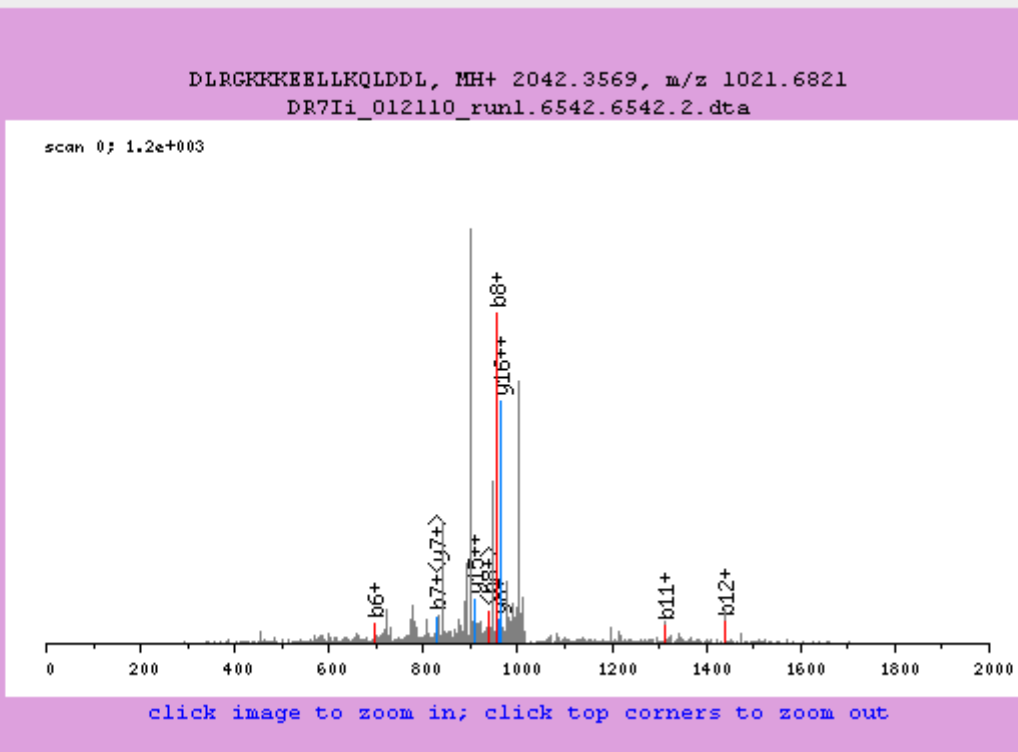

| b <sup>+</sup> | #  | AA | #  | y <sup>+</sup> | y <sup>2+</sup> |
|----------------|----|----|----|----------------|-----------------|
| 116.0953       | 1  | D  | 17 |                |                 |
| 229.2530       | 2  | L  | 16 | 1927.2695      | 964.1387        |
| 385.4387       | 3  | R  | 15 | 1814.1119      | 907.5599        |
| 442.4900       | 4  | G  | 14 | 1657.9262      | 829.4671        |
| 570.6623       | 5  | K  | 13 | 1600.8749      | 800.9414        |
| 698.8345       | 6  | K  | 12 | 1472.7026      | 736.8553        |
| 827.0068       | 7  | K  | 11 | 1344.5303      | 672.7691        |
| 956.1208       | 8  | E  | 10 | 1216.3580      | 608.6830        |
| 1085.2348      | 9  | E  | 9  | 1087.2441      | 544.1260        |
| 1198.3924      | 10 | L  | 8  | 958.1301       | 479.5690        |
| 1311.5501      | 11 | L  | 7  | 844.9724       | 422.9902        |
| 1439.7223      | 12 | K  | 6  | 731.8148       | 366.4114        |
| 1567.8516      | 13 | Q  | 5  | 603.6425       | 302.3252        |
| 1681.0092      | 14 | L  | 4  | 475.5133       | 238.2606        |
| 1796.0966      | 15 | D  | 3  | 362.3557       | 181.6818        |
| 1911.1840      | 16 | D  | 2  | 247.2683       | 124.1381        |
|                | 17 | L  | 1  | 132.1809       | 66.5944         |



# KVAPAPAVVKKQEAKK

**X-range:**  
 -

**MassTol:** **Y-zoom:**

**MassType:**  
 AVG  MONO

**Axis:**  
 1  2

**Label:**  
 I  M  -

**Ions:**

a  +  2+  3+

b  +  2+  3+

c  +  2+  3+

x  +  2+  3+

y  +  2+  3+

z  +  2+  3+

hide H<sub>2</sub>O/NH<sub>3</sub>

zoom 112-122

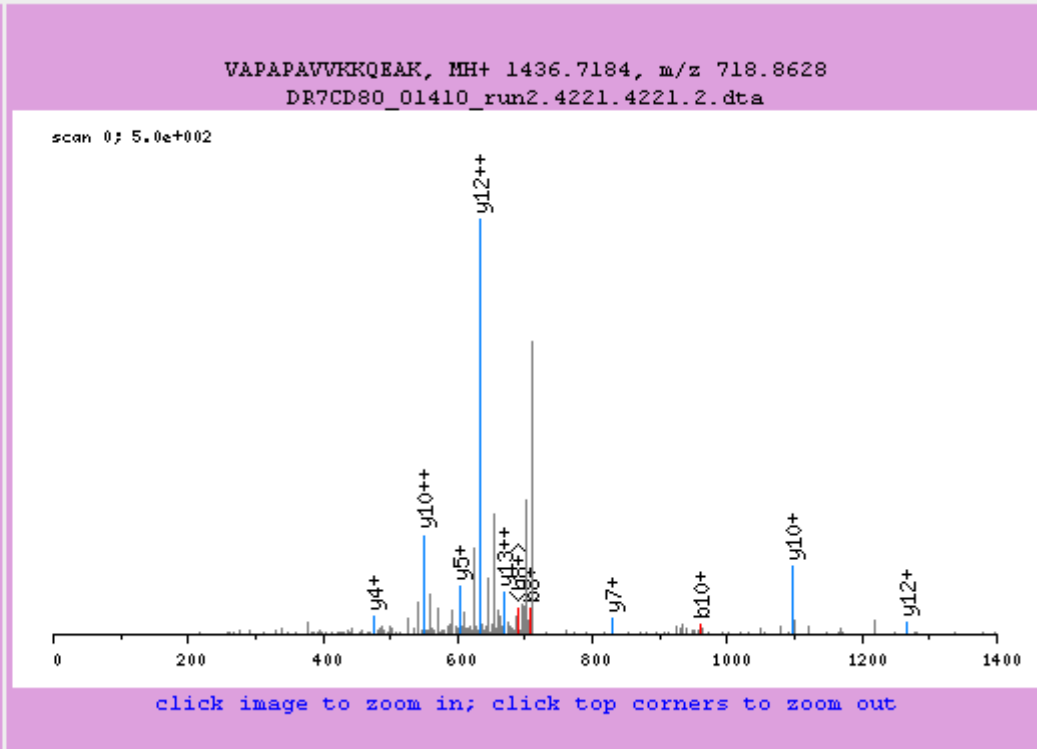

| b <sup>+</sup> | #  | AA | #  | y <sup>+</sup> | y <sup>2+</sup> |
|----------------|----|----|----|----------------|-----------------|
| 100.1390       | 1  | V  | 14 |                |                 |
| 171.2169       | 2  | R  | 13 | 1337.5873      | 669.2976        |
| 268.3321       | 3  | P  | 12 | 1266.5094      | 633.7587        |
| 339.4100       | 4  | R  | 11 | 1169.3943      | 585.2011        |
| 436.5252       | 5  | P  | 10 | 1098.3164      | 549.6622        |
| 507.6031       | 6  | R  | 9  | 1001.2012      | 501.1046        |
| 606.7341       | 7  | V  | 8  | 930.1233       | 465.5656        |
| 705.8652       | 8  | V  | 7  | 830.9922       | 416.0001        |
| 834.0375       | 9  | K  | 6  | 731.8612       | 366.4346        |
| 962.2097       | 10 | K  | 5  | 603.6889       | 302.3484        |
| 1090.3390      | 11 | Q  | 4  | 475.5166       | 238.2623        |
| 1219.4529      | 12 | E  | 3  | 347.3874       | 174.1977        |
| 1290.5308      | 13 | R  | 2  | 218.2734       | 109.6407        |
|                | 14 | K  | 1  | 147.1955       | 74.1017         |

# KHAVSEGTKAVTQYTSSKI

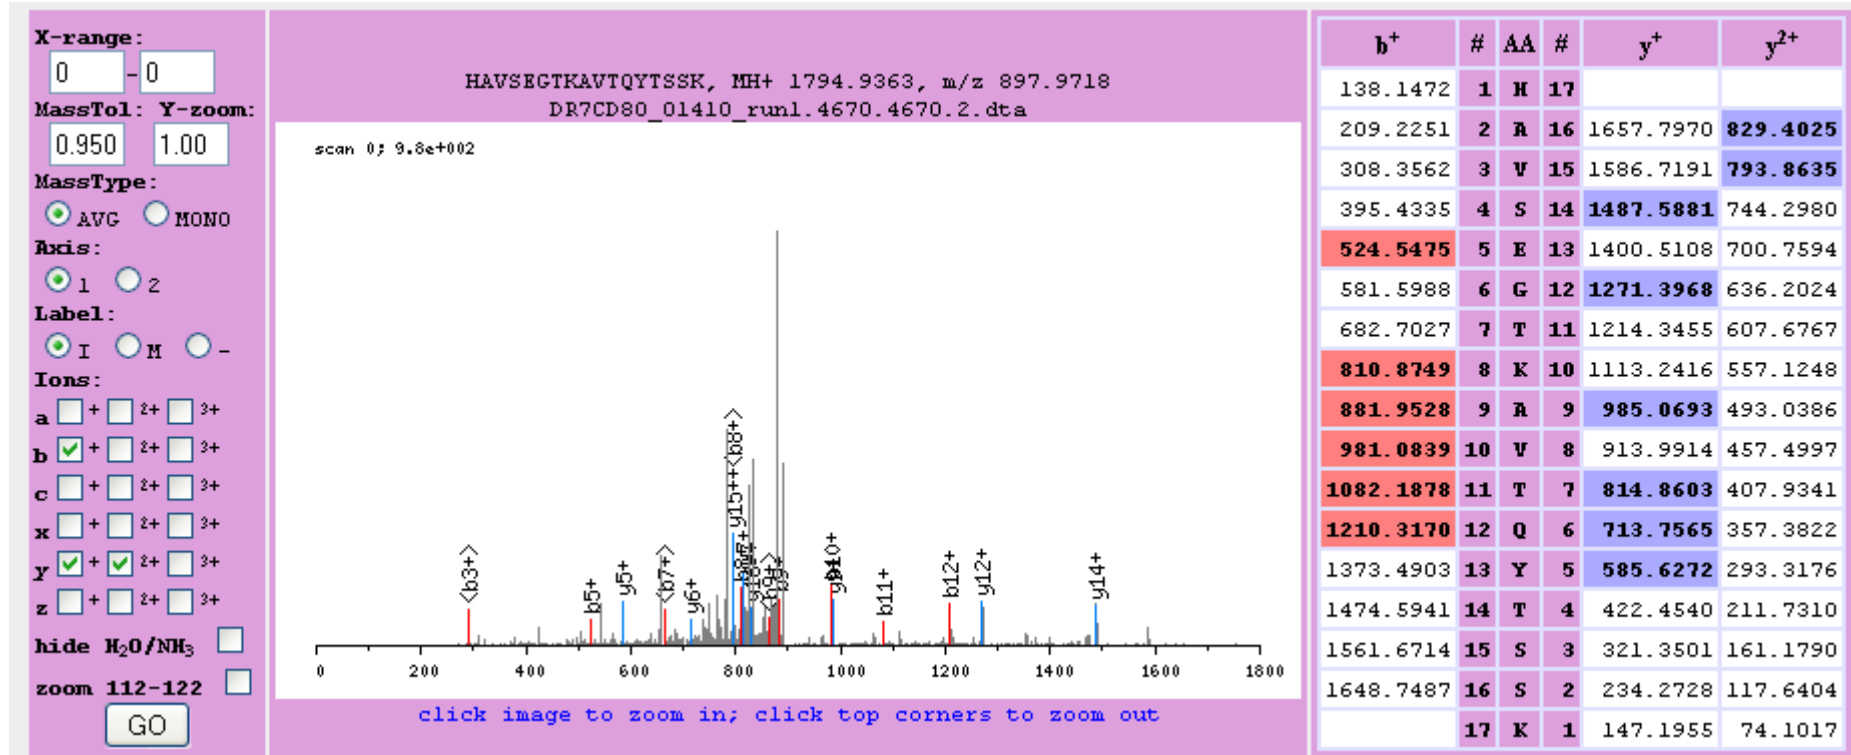

# SLSAKPAPPKPEPKPKR

**X-range:**  
 -

**MassTol:** **Y-zoom:**

**MassType:**  
 AVG  MONO

**Axis:**  
 1  2

**Label:**  
 I  M  -

**Ions:**

a  +  2+  3+

b  +  2+  3+

c  +  2+  3+

x  +  2+  3+

y  +  2+  3+

z  +  2+  3+

hide H<sub>2</sub>O/NH<sub>3</sub>

zoom 112-122

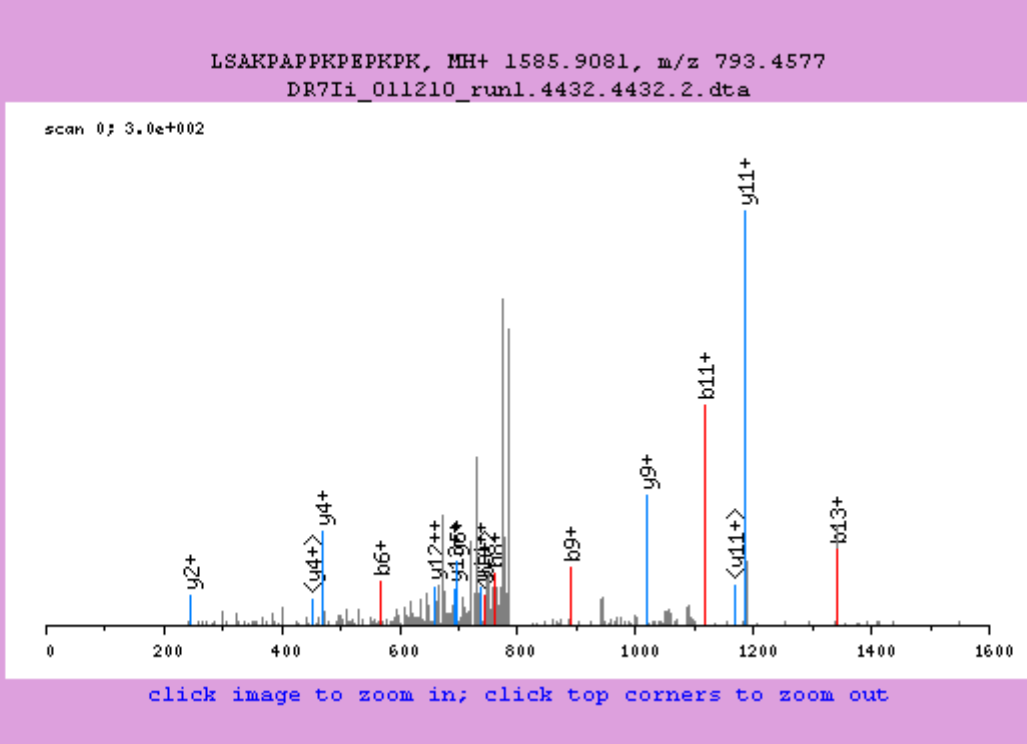

| b <sup>+</sup> | #  | AA | #  | y <sup>+</sup> | y <sup>2+</sup> |
|----------------|----|----|----|----------------|-----------------|
| 114.1656       | 1  | L  | 15 |                |                 |
| 201.2429       | 2  | S  | 14 | 1472.7505      | 736.8792        |
| 272.3208       | 3  | R  | 13 | 1385.6732      | 693.3406        |
| 400.4931       | 4  | K  | 12 | 1314.5953      | 657.8016        |
| 497.6082       | 5  | P  | 11 | 1186.4230      | 593.7155        |
| 568.6861       | 6  | R  | 10 | 1089.3078      | 545.1579        |
| 665.8013       | 7  | P  | 9  | 1018.2299      | 509.6189        |
| 762.9165       | 8  | P  | 8  | 921.1148       | 461.0614        |
| 891.0888       | 9  | K  | 7  | 823.9996       | 412.5038        |
| 988.2040       | 10 | P  | 6  | 695.8273       | 348.4176        |
| 1117.3179      | 11 | E  | 5  | 598.7121       | 299.8600        |
| 1214.4331      | 12 | P  | 4  | 469.5981       | 235.3030        |
| 1342.6054      | 13 | K  | 3  | 372.4830       | 186.7455        |
| 1439.7206      | 14 | P  | 2  | 244.3107       | 122.6593        |
|                | 15 | K  | 1  | 147.1955       | 74.1017         |

# FIRGVVDSEDLPLNISRE

**X-range:** 0 - 0

**MassTol:** 0.950 **Y-zoom:** 1.00

**MassType:**  
 AVG  MONO

**Axis:**  
 1  2

**Label:**  
 I  M  -

**Ions:**

a  +  2+  3+

b  +  2+  3+

c  +  2+  3+

x  +  2+  3+

y  +  2+  3+

z  +  2+  3+

hide H<sub>2</sub>O/NH<sub>3</sub>

zoom 112-122

**GO**

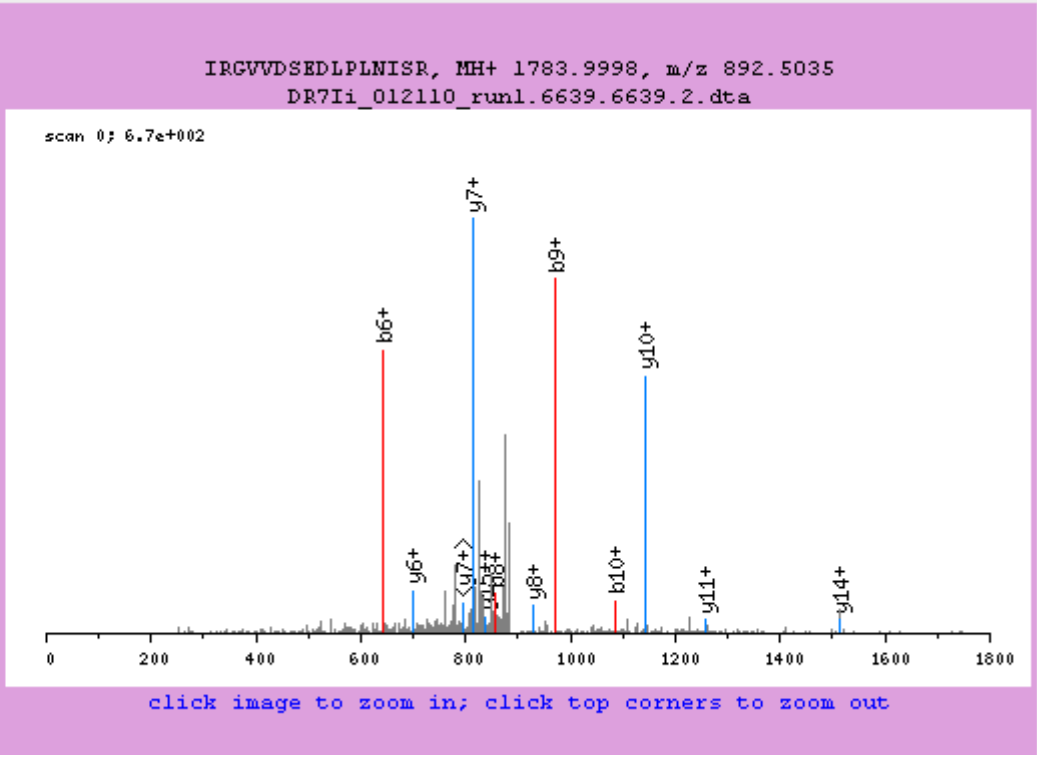

| b <sup>+</sup> | #  | AA | #  | y <sup>+</sup> | y <sup>2+</sup> |
|----------------|----|----|----|----------------|-----------------|
| 114.1656       | 1  | I  | 16 |                |                 |
| 270.3513       | 2  | R  | 15 | 1670.8421      | 835.9250        |
| 327.4026       | 3  | G  | 14 | 1514.6565      | 757.8322        |
| 426.5336       | 4  | V  | 13 | 1457.6051      | 729.3065        |
| 525.6647       | 5  | V  | 12 | 1358.4741      | 679.7410        |
| 640.7521       | 6  | D  | 11 | 1259.3430      | 630.1755        |
| 727.8294       | 7  | S  | 10 | 1144.2556      | 572.6318        |
| 856.9434       | 8  | E  | 9  | 1057.1783      | 529.0931        |
| 972.0308       | 9  | D  | 8  | 928.0643       | 464.5361        |
| 1085.1884      | 10 | L  | 7  | 812.9769       | 406.9924        |
| 1182.3036      | 11 | P  | 6  | 699.8193       | 350.4136        |
| 1295.4612      | 12 | L  | 5  | 602.7041       | 301.8560        |
| 1409.5639      | 13 | N  | 4  | 489.5465       | 245.2772        |
| 1522.7215      | 14 | I  | 3  | 375.4438       | 188.2259        |
| 1609.7988      | 15 | S  | 2  | 262.2862       | 131.6471        |
|                | 16 | R  | 1  | 175.2089       | 88.1084         |

# LTLKYPIEHGITNWDDMEKIWHHTFY

X-range:

0 - 0

MassTol: Y-zoom:

0.950 1.00

MassType:

AVG  MONO

Axis:

1  2

Label:

I  M  -

Ions:

a  +  2+  3+

b  +  2+  3+

c  +  2+  3+

x  +  2+  3+

y  +  2+  3+

z  +  2+  3+

hide H<sub>2</sub>O/NH<sub>3</sub>

zoom 112-122

GO

YPIEHGITNWDDMEKIWHHTF, MH+ 2784.0865, m/z 928.7004  
DR7Ii\_011210\_run2.8162.8162.3.dta

scan 0; 2.9e+002

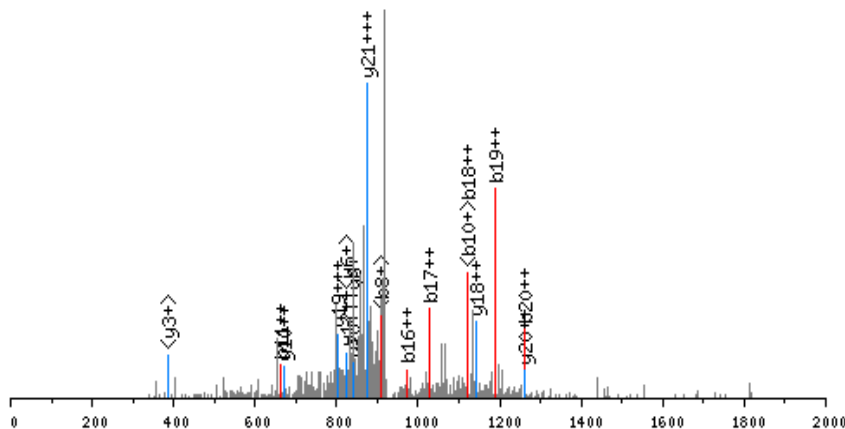

click image to zoom in; click top corners to zoom out

| b <sup>+</sup> | b <sup>2+</sup> | #  | AA | #  | y <sup>+</sup> | y <sup>2+</sup> | y <sup>3+</sup> |
|----------------|-----------------|----|----|----|----------------|-----------------|-----------------|
| 164.1812       | 82.5946         | 1  | Y  | 22 |                |                 |                 |
| 261.2964       | 131.1522        | 2  | P  | 21 | 2620.9133      | 1310.9606       | 874.3097        |
| 374.4540       | 187.7310        | 3  | I  | 20 | 2523.7981      | 1262.4030       | 841.9380        |
| 503.5680       | 252.2880        | 4  | E  | 19 | 2410.6405      | 1205.8242       | 804.2188        |
| 640.7073       | 320.8576        | 5  | H  | 18 | 2281.5265      | 1141.2672       | 761.1808        |
| 697.7586       | 349.3833        | 6  | G  | 17 | 2144.3872      | 1072.6976       | 715.4677        |
| 810.9162       | 405.9621        | 7  | I  | 16 | 2087.3359      | 1044.1719       | 696.4506        |
| 924.0739       | 462.5409        | 8  | I  | 15 | 1974.1782      | 987.5931        | 658.7314        |
| 1025.1778      | 513.0929        | 9  | T  | 14 | 1861.0206      | 931.0143        | 621.0122        |
| 1139.2804      | 570.1442        | 10 | N  | 13 | 1759.9167      | 880.4623        | 587.3109        |
| 1325.4903      | 663.2491        | 11 | W  | 12 | 1645.8141      | 823.4110        | 549.2767        |
| 1440.5777      | 720.7928        | 12 | D  | 11 | 1459.6042      | 730.3061        | 487.2067        |
| 1555.6651      | 778.3365        | 13 | D  | 10 | 1344.5168      | 672.7624        | 448.8442        |
| 1686.8612      | 843.9346        | 14 | M  | 9  | 1229.4294      | 615.2187        | 410.4818        |
| 1815.9751      | 908.4915        | 15 | E  | 8  | 1098.2333      | 549.6206        | 366.7497        |
| 1944.1474      | 972.5777        | 16 | K  | 7  | 969.1193       | 485.0636        | 323.7117        |
| 2057.3051      | 1029.1565       | 17 | I  | 6  | 840.9471       | 420.9775        | 280.9876        |
| 2243.5150      | 1122.2615       | 18 | W  | 5  | 727.7894       | 364.3987        | 243.2684        |
| 2380.6542      | 1190.8311       | 19 | H  | 4  | 541.5795       | 271.2937        | 181.1985        |
| 2517.7935      | 1259.4007       | 20 | H  | 3  | 404.4402       | 202.7241        | 135.4854        |
| 2618.8974      | 1309.9527       | 21 | T  | 2  | 267.3010       | 134.1545        | 89.7723         |
|                |                 | 22 | F  | 1  | 166.1971       | 83.6025         | 56.0710         |

# RAVGRLEAVSHTSDMHRG

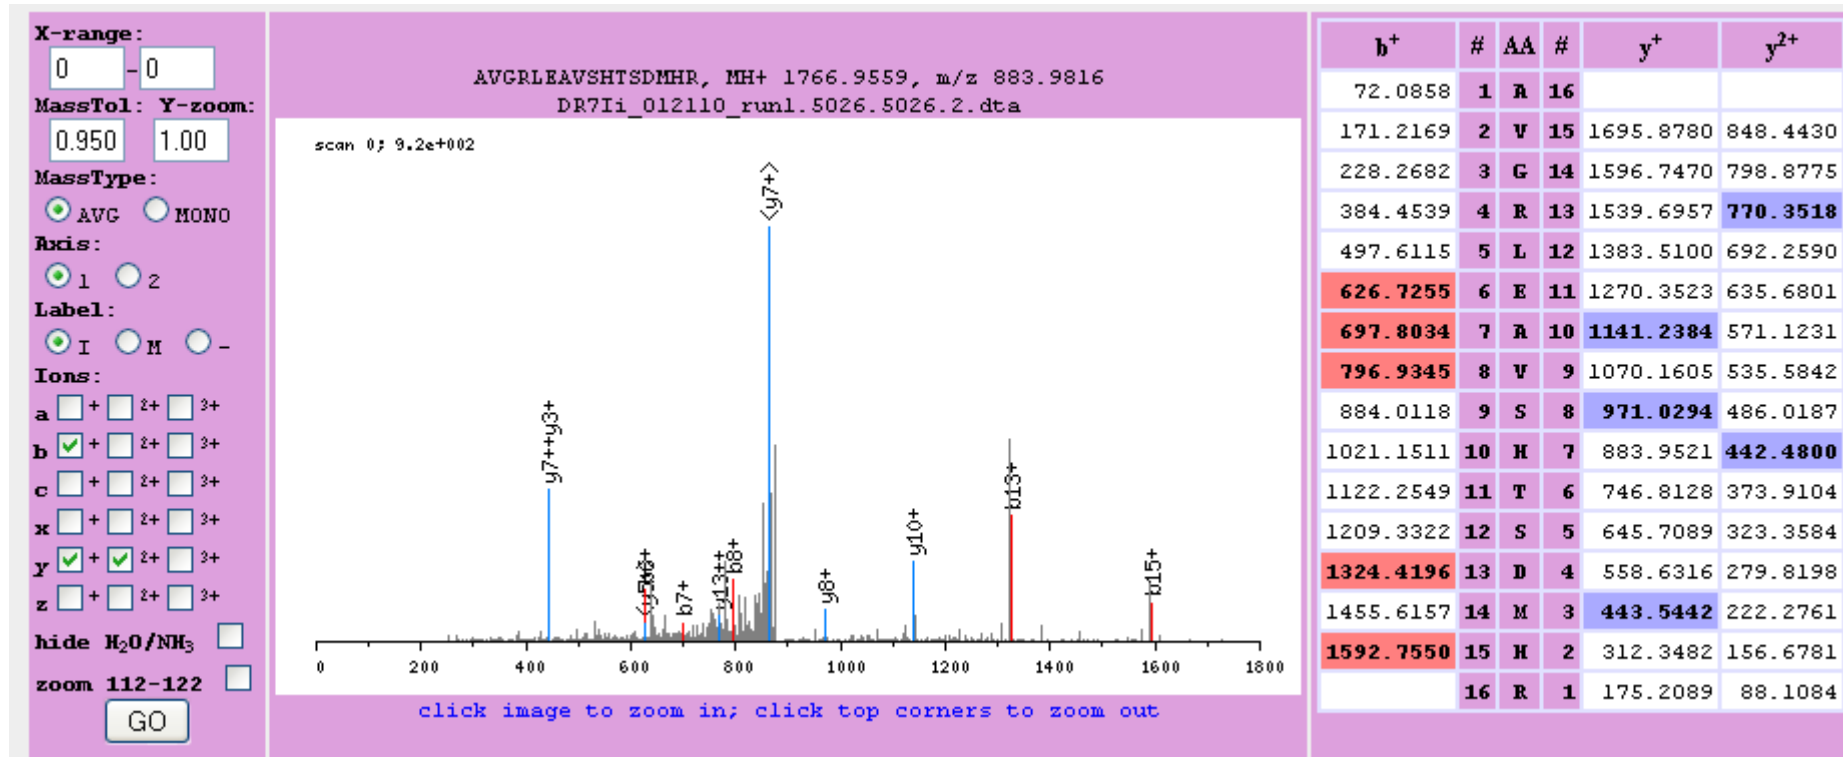

# QETIDKTANQASDTFSGIGKKF

X-range:

0 - 0

MassTol: Y-zoom:

0.950 1.00

MassType:

AVG  MONO

Axis:

1  2

Label:

I  M  -

Ions:

a  +  2+  3+

b  +  2+  3+

c  +  2+  3+

x  +  2+  3+

y  +  2+  3+

z  +  2+  3+

hide H<sub>2</sub>O/NH<sub>3</sub>

zoom 112-122

GO

ETIDKTANQASDTFSGIGKK, MH+ 2112.2745, m/z 1056.6409  
DR7CD80\_012610\_run1.6046.6046.2.dta

scan 0; 1.6e+003

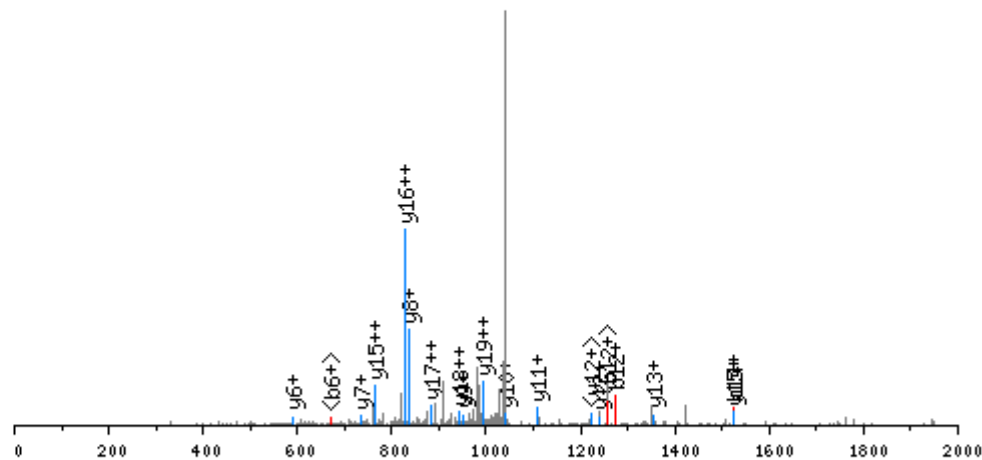

click image to zoom in; click top corners to zoom out

| b <sup>+</sup> | #  | AA | #  | y <sup>+</sup> | y <sup>2+</sup> |
|----------------|----|----|----|----------------|-----------------|
| 130.1219       | 1  | E  | 20 |                |                 |
| 231.2258       | 2  | T  | 19 | 1983.1605      | 992.0842        |
| 344.3834       | 3  | I  | 18 | 1882.0567      | 941.5323        |
| 459.4708       | 4  | D  | 17 | 1768.8990      | 884.9535        |
| 587.6431       | 5  | K  | 16 | 1653.8116      | 827.4098        |
| 688.7470       | 6  | T  | 15 | 1525.6393      | 763.3236        |
| 759.8249       | 7  | R  | 14 | 1424.5355      | 712.7717        |
| 873.9275       | 8  | N  | 13 | 1353.4576      | 677.2328        |
| 1002.0568      | 9  | Q  | 12 | 1239.3549      | 620.1814        |
| 1073.1347      | 10 | R  | 11 | 1111.2257      | 556.1168        |
| 1160.2120      | 11 | S  | 10 | 1040.1478      | 520.5779        |
| 1275.2994      | 12 | D  | 9  | 953.0705       | 477.0392        |
| 1376.4032      | 13 | T  | 8  | 837.9831       | 419.4955        |
| 1523.5771      | 14 | F  | 7  | 736.8792       | 368.9436        |
| 1610.6544      | 15 | S  | 6  | 589.7054       | 295.3566        |
| 1667.7057      | 16 | G  | 5  | 502.6281       | 251.8180        |
| 1780.8634      | 17 | I  | 4  | 445.5767       | 223.2923        |
| 1837.9147      | 18 | G  | 3  | 332.4191       | 166.7135        |
| 1966.0870      | 19 | K  | 2  | 275.3678       | 138.1879        |
|                | 20 | K  | 1  | 147.1955       | 74.1017         |

# LYKAGENRWGTDEDKFT

X-range:  -

MassTol:  Y-zoom:

MassType:  
 AVG  MONO

Axis:  
 1  2

Label:  
 I  M  -

Ions:  
a  +  2+  3+  
b  +  2+  3+  
c  +  2+  3+  
x  +  2+  3+  
y  +  2+  3+  
z  +  2+  3+

hide H<sub>2</sub>O/NH<sub>3</sub>

zoom

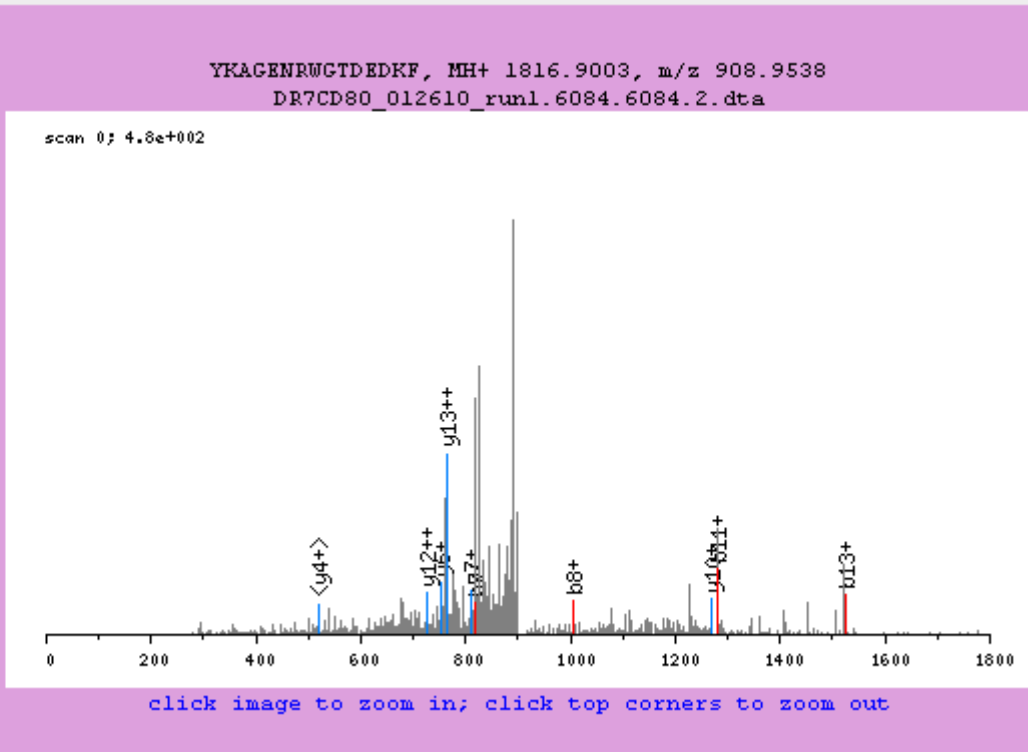

| b <sup>+</sup>   | #  | AA | #  | y <sup>+</sup>   | y <sup>2+</sup> |
|------------------|----|----|----|------------------|-----------------|
| 164.1812         | 1  | Y  | 15 |                  |                 |
| 292.3535         | 2  | K  | 14 | 1653.7270        | 827.3675        |
| 363.4314         | 3  | R  | 13 | 1525.5548        | <b>763.2813</b> |
| 420.4827         | 4  | G  | 12 | 1454.4769        | <b>727.7424</b> |
| 549.5967         | 5  | E  | 11 | 1397.4255        | 699.2167        |
| 663.6993         | 6  | N  | 10 | <b>1268.3116</b> | 634.6597        |
| <b>819.8850</b>  | 7  | R  | 9  | 1154.2089        | 577.6084        |
| <b>1006.0949</b> | 8  | W  | 8  | 998.0232         | 499.5156        |
| 1063.1462        | 9  | G  | 7  | <b>811.8133</b>  | 406.4106        |
| 1164.2501        | 10 | T  | 6  | <b>754.7620</b>  | 377.8850        |
| <b>1279.3375</b> | 11 | D  | 5  | 653.6581         | 327.3330        |
| 1408.4515        | 12 | E  | 4  | 538.5707         | 269.7893        |
| <b>1523.5389</b> | 13 | D  | 3  | 409.4568         | 205.2323        |
| 1651.7112        | 14 | K  | 2  | 294.3694         | 147.6886        |
|                  | 15 | F  | 1  | 166.1971         | 83.6025         |



# AYELKHALKGAGTNEKVL

**X-range:**  
 -   
**MassTol:**  **Y-zoom:**   
**MassType:**  
 AVG  MONO  
**Axis:**  
 1  2  
**Label:**  
 I  M  -  
**Ions:**  
 a  +  2+  3+  
 b  +  2+  3+  
 c  +  2+  3+  
 x  +  2+  3+  
 Y  +  2+  3+  
 z  +  2+  3+  
 hide H<sub>2</sub>O/NH<sub>3</sub>  
 zoom

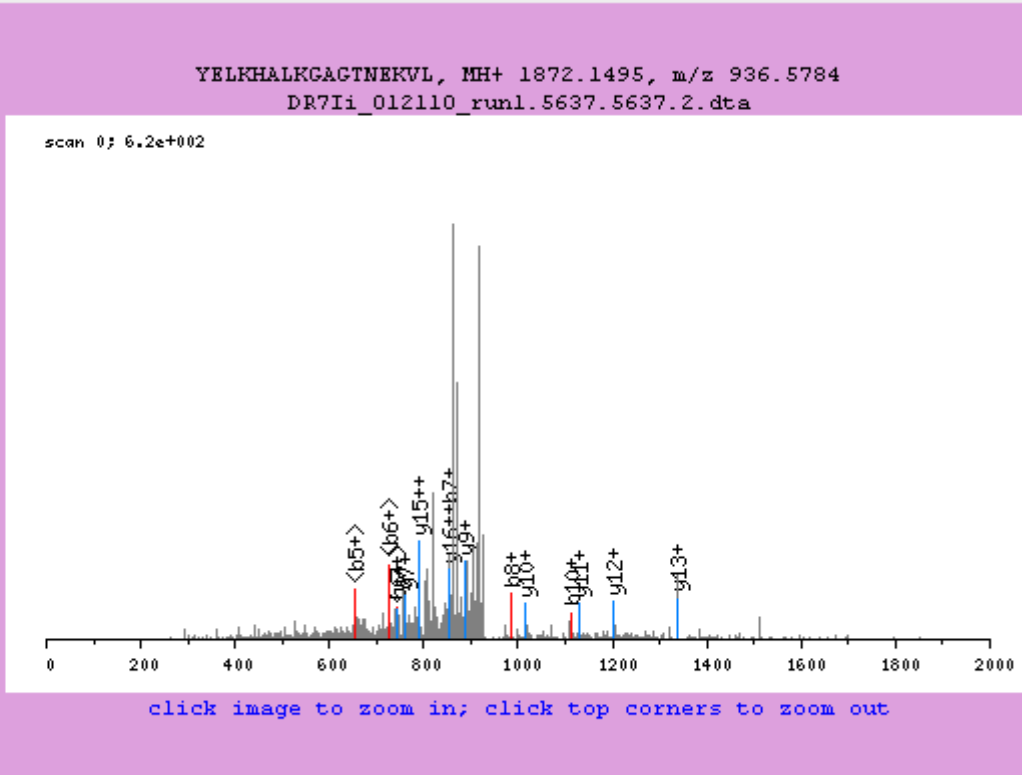

| b <sup>+</sup> | #  | AA | #  | y <sup>+</sup> | y <sup>2+</sup> |
|----------------|----|----|----|----------------|-----------------|
| 164.1812       | 1  | Y  | 17 |                |                 |
| 293.2952       | 2  | E  | 16 | 1708.9762      | 854.9921        |
| 406.4528       | 3  | L  | 15 | 1579.8623      | 790.4351        |
| 534.6251       | 4  | K  | 14 | 1466.7046      | 733.8563        |
| 671.7644       | 5  | H  | 13 | 1338.5323      | 669.7701        |
| 742.8423       | 6  | R  | 12 | 1201.3931      | 601.2005        |
| 855.9999       | 7  | L  | 11 | 1130.3152      | 565.6615        |
| 984.1722       | 8  | K  | 10 | 1017.1575      | 509.0827        |
| 1041.2235      | 9  | G  | 9  | 888.9852       | 444.9966        |
| 1112.3014      | 10 | R  | 8  | 831.9339       | 416.4709        |
| 1169.3527      | 11 | G  | 7  | 760.8560       | 380.9320        |
| 1270.4566      | 12 | T  | 6  | 703.8047       | 352.4063        |
| 1384.5593      | 13 | N  | 5  | 602.7008       | 301.8544        |
| 1513.6732      | 14 | E  | 4  | 488.5982       | 244.8031        |
| 1641.8455      | 15 | K  | 3  | 359.4842       | 180.2461        |
| 1740.9766      | 16 | V  | 2  | 231.3119       | 116.1599        |
|                | 17 | L  | 1  | 132.1809       | 66.5944         |

# FRFGAPPHAGGGIGLERV

**X-range:**  
 -

**MassTol:**  **Y-zoom:**

**MassType:**  
 AVG  MONO

**Axis:**  
 1  2

**Label:**  
 I  M  -

**Ions:**

a  +  2+  3+

b  +  2+  3+

c  +  2+  3+

x  +  2+  3+

y  +  2+  3+

z  +  2+  3+

hide H<sub>2</sub>O/NH<sub>3</sub>

zoom 112-122

RFGAPPHAGGGIGLER, MH+ 1592.7797, m/z 796.8935  
 DR7Ii\_012110\_run1.5605.5605.2.dta

scan 0; 1.4e+003

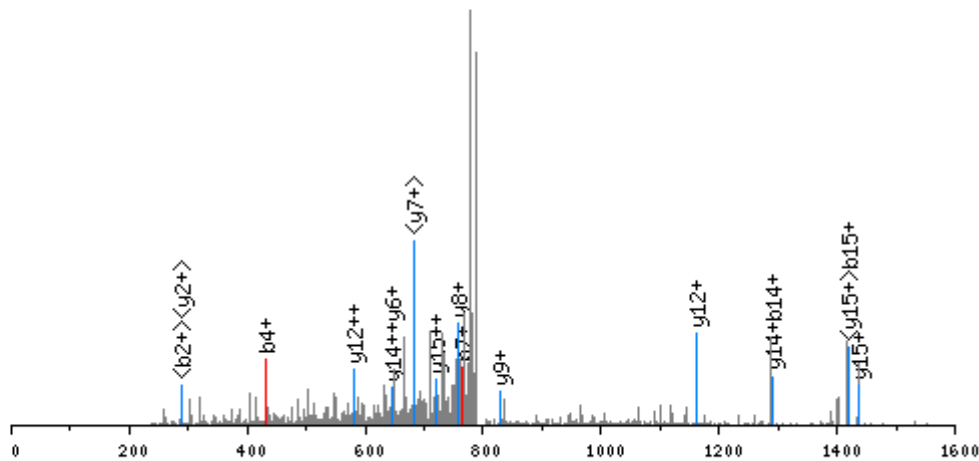

click image to zoom in; click top corners to zoom out

| b <sup>+</sup> | #  | AA | #  | y <sup>+</sup> | y <sup>2+</sup> |
|----------------|----|----|----|----------------|-----------------|
| 157.1936       | 1  | R  | 16 |                |                 |
| 304.3675       | 2  | F  | 15 | 1436.5941      | 718.8010        |
| 361.4188       | 3  | G  | 14 | 1289.4202      | 645.2141        |
| 432.4967       | 4  | R  | 13 | 1232.3689      | 616.6884        |
| 529.6119       | 5  | P  | 12 | 1161.2910      | 581.1495        |
| 626.7271       | 6  | P  | 11 | 1064.1758      | 532.5919        |
| 763.8663       | 7  | H  | 10 | 967.0606       | 484.0343        |
| 834.9442       | 8  | R  | 9  | 829.9213       | 415.4646        |
| 891.9956       | 9  | G  | 8  | 758.8434       | 379.9257        |
| 949.0469       | 10 | G  | 7  | 701.7921       | 351.4000        |
| 1006.0982      | 11 | G  | 6  | 644.7408       | 322.8744        |
| 1119.2558      | 12 | I  | 5  | 587.6895       | 294.3487        |
| 1176.3072      | 13 | G  | 4  | 474.5318       | 237.7699        |
| 1289.4648      | 14 | L  | 3  | 417.4805       | 209.2442        |
| 1418.5788      | 15 | E  | 2  | 304.3229       | 152.6654        |
|                | 16 | R  | 1  | 175.2089       | 88.1084         |

# EFKANA EKTSGSNVKIVKVKKE

**X-range:**  
 -   
**MassTol:** **Y-zoom:**  
   
**MassType:**  
 AVG  MONO  
**Axis:**  
 1  2  
**Label:**  
 I  M  -  
**Ions:**  
**a**  +  2+  3+  
**b**  +  2+  3+  
**c**  +  2+  3+  
**x**  +  2+  3+  
**y**  +  2+  3+  
**z**  +  2+  3+  
**hide H<sub>2</sub>O/NH<sub>3</sub>**   
**zoom 112-122**

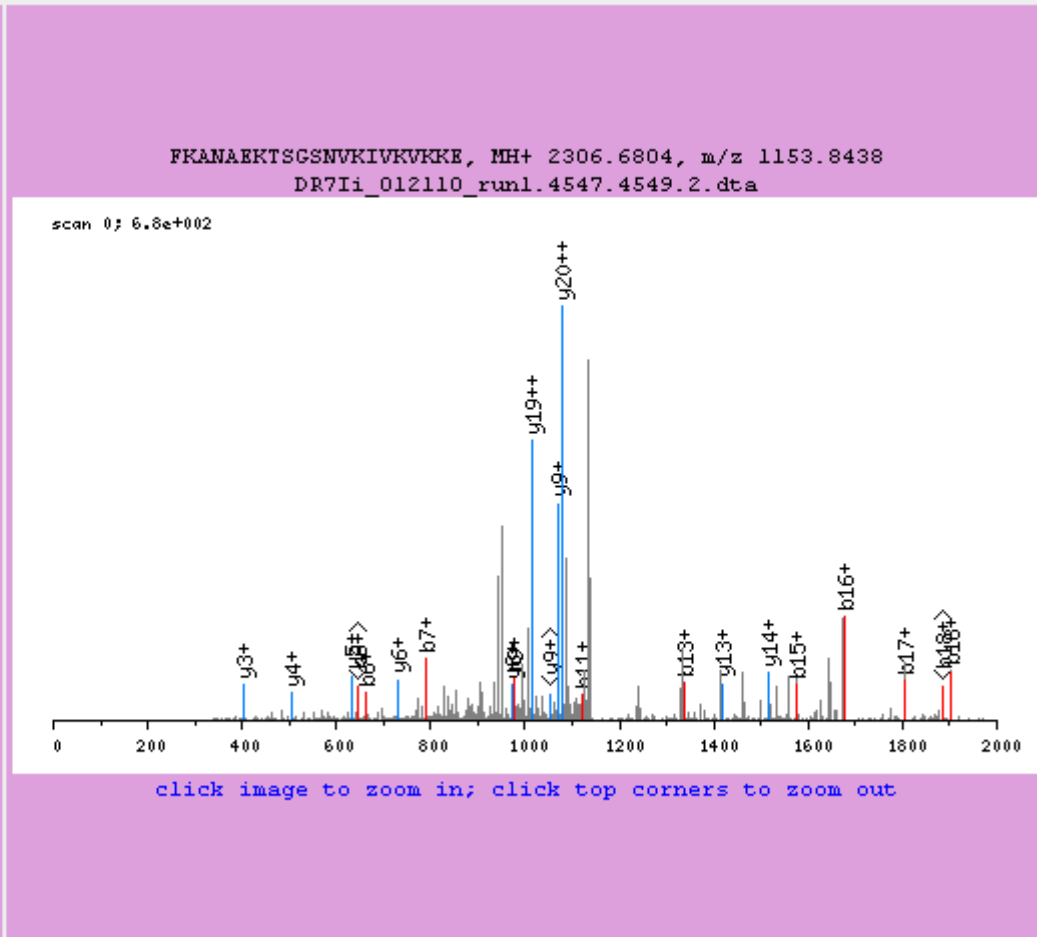

| b <sup>+</sup> | #  | AA | #  | y <sup>+</sup> | y <sup>2+</sup> |
|----------------|----|----|----|----------------|-----------------|
| 148.1818       | 1  | F  | 21 |                |                 |
| 276.3541       | 2  | K  | 20 | 2159.5066      | 1080.2572       |
| 347.4320       | 3  | R  | 19 | 2031.3343      | 1016.1711       |
| 461.5346       | 4  | N  | 18 | 1960.2564      | 980.6322        |
| 532.6125       | 5  | R  | 17 | 1846.1537      | 923.5808        |
| 661.7265       | 6  | E  | 16 | 1775.0758      | 888.0419        |
| 789.8988       | 7  | K  | 15 | 1645.9619      | 823.4849        |
| 891.0027       | 8  | T  | 14 | 1517.7896      | 759.3988        |
| 978.0800       | 9  | S  | 13 | 1416.6857      | 708.8468        |
| 1035.1313      | 10 | G  | 12 | 1329.6084      | 665.3082        |
| 1122.2086      | 11 | S  | 11 | 1272.5571      | 636.7825        |
| 1236.3112      | 12 | N  | 10 | 1185.4798      | 593.2439        |
| 1335.4423      | 13 | V  | 9  | 1071.3771      | 536.1925        |
| 1463.6146      | 14 | K  | 8  | 972.2461       | 486.6270        |
| 1576.7722      | 15 | I  | 7  | 844.0738       | 422.5409        |
| 1675.9033      | 16 | V  | 6  | 730.9162       | 365.9620        |
| 1804.0755      | 17 | K  | 5  | 631.7851       | 316.3965        |
| 1903.2066      | 18 | V  | 4  | 503.6128       | 252.3104        |
| 2031.3789      | 19 | K  | 3  | 404.4818       | 202.7448        |
| 2159.5512      | 20 | K  | 2  | 276.3095       | 138.6587        |
|                | 21 | E  | 1  | 148.1372       | 74.5726         |

# STPTLTPTDTFQTVETLTCLSLERNRL

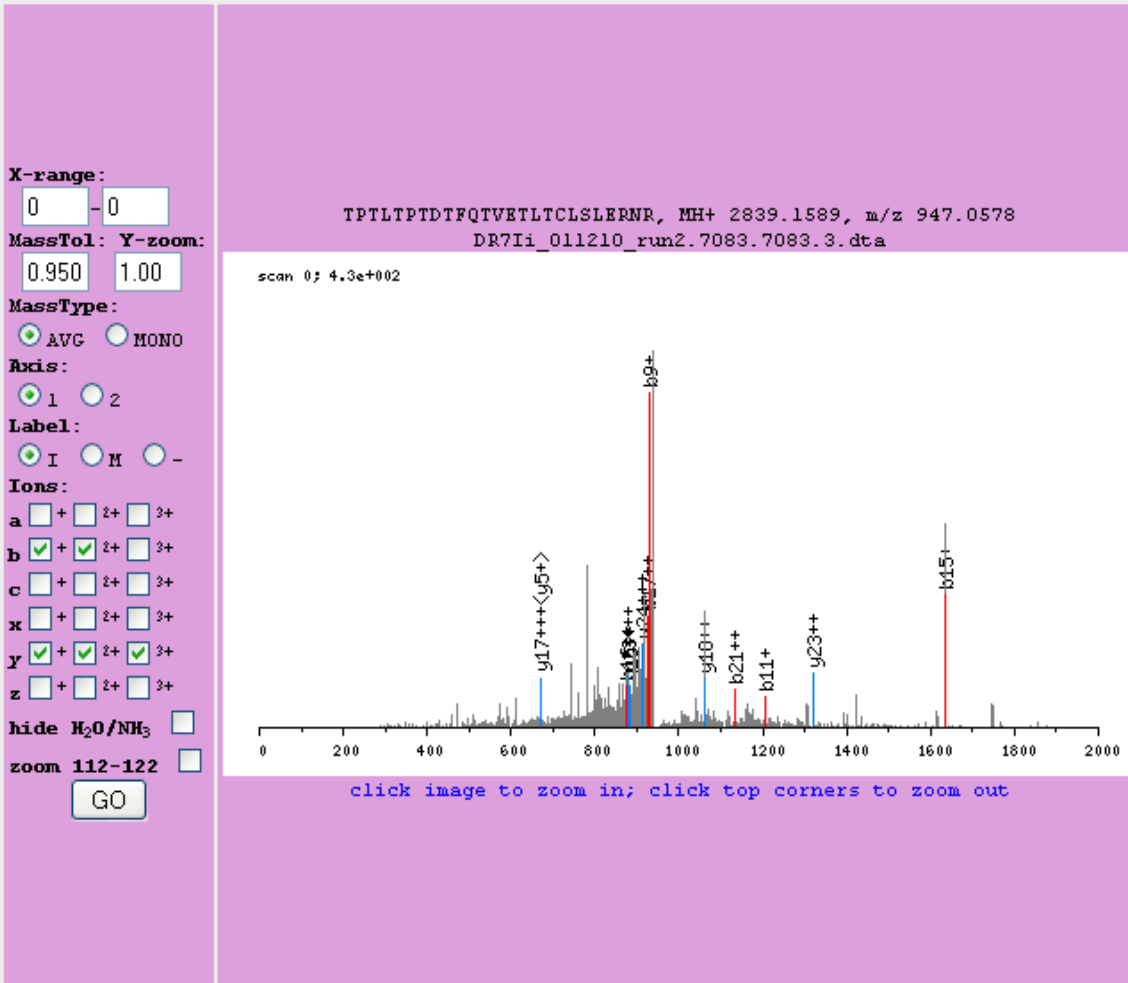

| b <sup>+</sup> | b <sup>2+</sup> | #  | AA | #  | y <sup>+</sup> | y <sup>2+</sup> | y <sup>3+</sup> |
|----------------|-----------------|----|----|----|----------------|-----------------|-----------------|
| 102.1118       | 51.5599         | 1  | T  | 25 |                |                 |                 |
| 199.2270       | 100.1175        | 2  | P  | 24 | 2738.0550      | 1369.5315       | 913.3570        |
| 300.3309       | 150.6694        | 3  | T  | 23 | 2640.9398      | 1320.9739       | 880.9852        |
| 413.4885       | 207.2482        | 4  | L  | 22 | 2539.8359      | 1270.4219       | 847.2839        |
| 514.5924       | 257.8002        | 5  | T  | 21 | 2426.6783      | 1213.8431       | 809.5647        |
| 611.7076       | 306.3578        | 6  | P  | 20 | 2325.5744      | 1163.2912       | 775.8634        |
| 712.8115       | 356.9097        | 7  | T  | 19 | 2228.4592      | 1114.7336       | 743.4917        |
| 827.8989       | 414.4534        | 8  | D  | 18 | 2127.3554      | 1064.1817       | 709.7904        |
| 929.0027       | 465.0053        | 9  | T  | 17 | 2012.2680      | 1006.6380       | 671.4279        |
| 1076.1766      | 538.5923        | 10 | F  | 16 | 1911.1641      | 956.0860        | 637.7267        |
| 1204.3058      | 602.6569        | 11 | Q  | 15 | 1763.9902      | 882.4991        | 588.6687        |
| 1305.4097      | 653.2088        | 12 | T  | 14 | 1635.8610      | 818.4345        | 545.9590        |
| 1404.5408      | 702.7744        | 13 | V  | 13 | 1534.7571      | 767.8825        | 512.2577        |
| 1533.6547      | 767.3313        | 14 | E  | 12 | 1435.6261      | 718.3170        | 479.2140        |
| 1634.7586      | 817.8833        | 15 | T  | 11 | 1306.5121      | 653.7600        | 436.1760        |
| 1747.9163      | 874.4621        | 16 | L  | 10 | 1205.4082      | 603.2081        | 402.4747        |
| 1849.0201      | 925.0140        | 17 | T  | 9  | 1092.2506      | 546.6293        | 364.7555        |
| 1952.1630      | 976.5855        | 18 | C  | 8  | 991.1467       | 496.0773        | 331.0542        |
| 2065.3207      | 1033.1643       | 19 | L  | 7  | 888.0038       | 444.5059        | 296.6732        |
| 2152.3980      | 1076.7030       | 20 | S  | 6  | 774.8461       | 387.9270        | 258.9540        |
| 2265.5556      | 1133.2818       | 21 | L  | 5  | 687.7688       | 344.3884        | 229.9282        |
| 2394.6696      | 1197.8388       | 22 | E  | 4  | 574.6112       | 287.8096        | 192.2090        |
| 2550.8553      | 1275.9316       | 23 | R  | 3  | 445.4972       | 223.2526        | 149.1710        |
| 2664.9579      | 1332.9829       | 24 | N  | 2  | 289.3115       | 145.1597        | 97.1091         |
|                |                 | 25 | R  | 1  | 175.2089       | 88.1084         | 59.0749         |

# RVERIMSETYMLIKQVDE

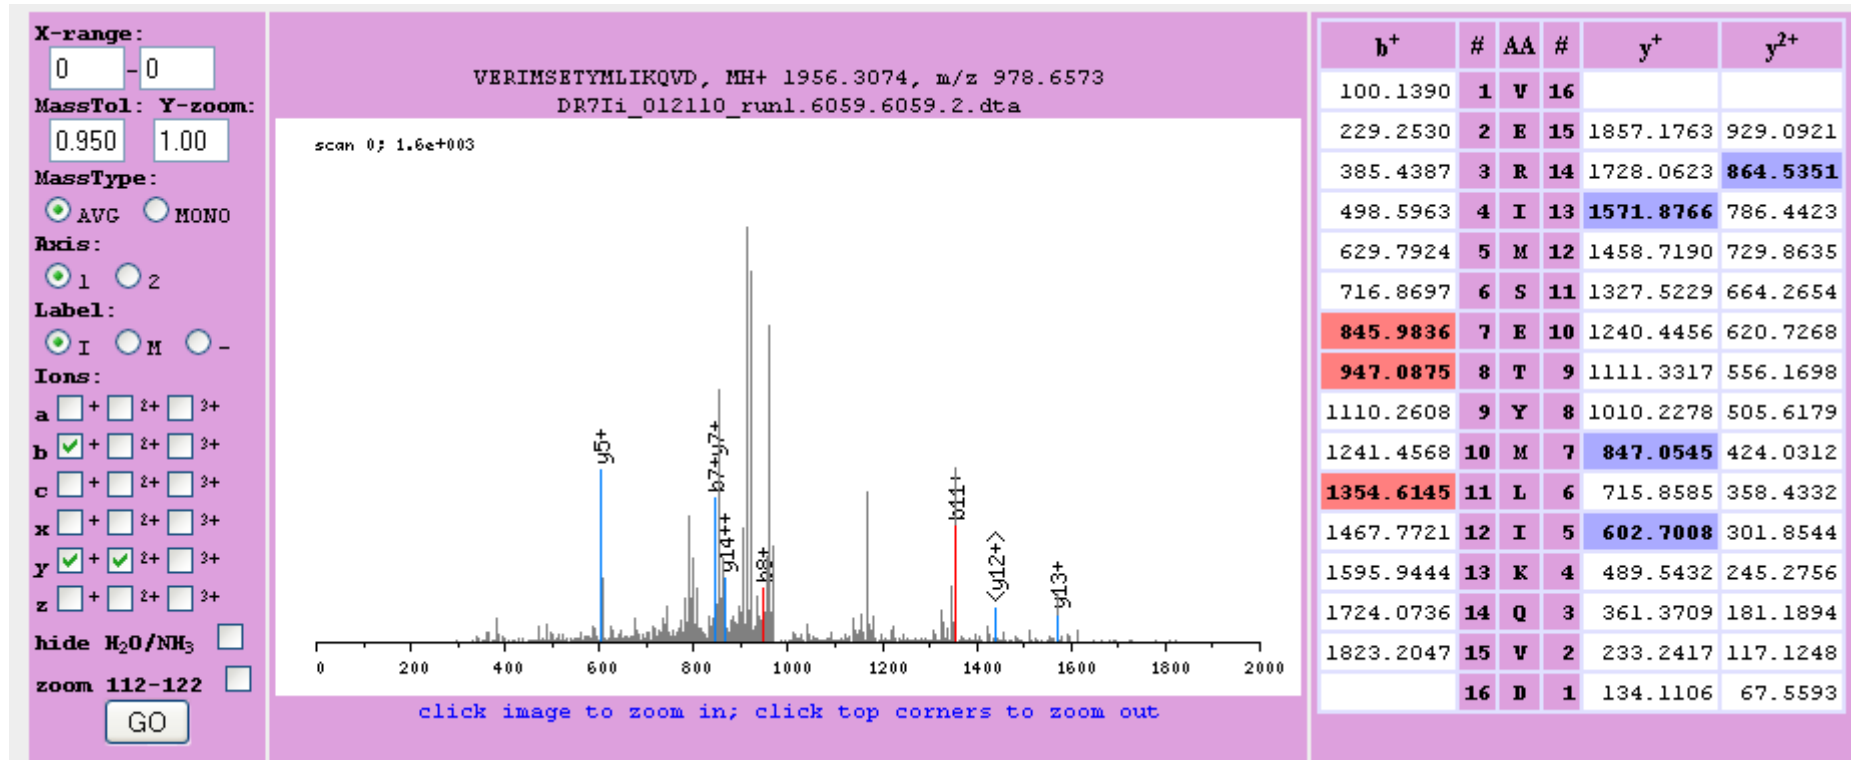

# TRGAARAAVSPAGGARSAPARATAAPRRAATHRPA

X-range:

0 - 0

MassTol: Y-zoom:

0.950 1.00

MassType:

AVG  MONO

Acis:

1  2

Label:

I  M  -

Ions:

a  +  2+  3+

b  +  2+  3+

c  +  2+  3+

x  +  2+  3+

y  +  2+  3+

z  +  2+  3+

hide H<sub>2</sub>O/NH<sub>3</sub>

zoom 112-122

GO

RGAAARAAVSPAGGARSAPARATAAPRRAATHRPA, MH+ 3279.6610, m/z 1093.8918  
DR7Ii\_011210\_run1.6264.6264.3.dta

scan 0: 3.3e+003

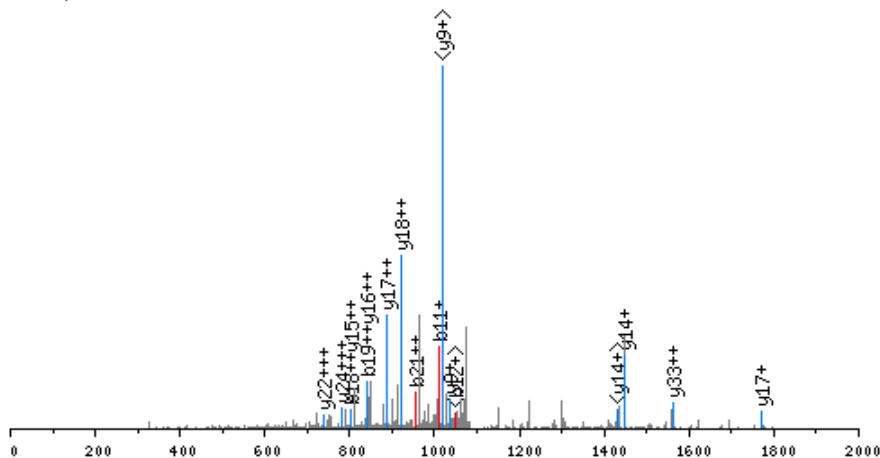

click image to zoom in; click top corners to zoom out

| b <sup>+</sup> | b <sup>2+</sup> | #  | AA | #  | y <sup>+</sup> | y <sup>2+</sup> | y <sup>3+</sup> |
|----------------|-----------------|----|----|----|----------------|-----------------|-----------------|
| 157.1936       | 79.1008         | 1  | R  | 34 |                |                 |                 |
| 214.2449       | 107.6264        | 2  | G  | 33 | 3123.4753      | 1562.2416       | 1041.8304       |
| 285.3228       | 143.1654        | 3  | R  | 32 | 3066.4240      | 1533.7160       | 1022.8133       |
| 356.4007       | 178.7043        | 4  | R  | 31 | 2995.3461      | 1498.1770       | 999.1206        |
| 512.5864       | 256.7972        | 5  | R  | 30 | 2924.2682      | 1462.6380       | 975.4280        |
| 583.6643       | 292.3361        | 6  | R  | 29 | 2768.0825      | 1384.5452       | 923.3661        |
| 654.7422       | 327.8751        | 7  | R  | 28 | 2697.0046      | 1349.0063       | 899.6735        |
| 753.8733       | 377.4406        | 8  | V  | 27 | 2625.9267      | 1313.4673       | 875.9809        |
| 840.9506       | 420.9793        | 9  | S  | 26 | 2526.7956      | 1263.9018       | 842.9372        |
| 938.0658       | 469.5369        | 10 | P  | 25 | 2439.7183      | 1220.3631       | 813.9114        |
| 1009.1437      | 505.0758        | 11 | R  | 24 | 2342.6031      | 1171.8055       | 781.5397        |
| 1066.1950      | 533.6015        | 12 | G  | 23 | 2271.5252      | 1136.2666       | 757.8470        |
| 1123.2463      | 562.1271        | 13 | G  | 22 | 2214.4739      | 1107.7409       | 738.8299        |
| 1194.3242      | 597.6661        | 14 | R  | 21 | 2157.4226      | 1079.2153       | 719.8128        |
| 1350.5099      | 675.7589        | 15 | R  | 20 | 2086.3447      | 1043.6763       | 696.1202        |
| 1437.5872      | 719.2976        | 16 | S  | 19 | 1930.1590      | 965.5835        | 644.0583        |
| 1508.6651      | 754.8365        | 17 | R  | 18 | 1843.0817      | 922.0448        | 615.0325        |
| 1605.7803      | 803.3941        | 18 | P  | 17 | 1772.0038      | 886.5059        | 591.3399        |
| 1676.8582      | 838.9330        | 19 | R  | 16 | 1674.8886      | 837.9483        | 558.9682        |
| 1833.0438      | 917.0259        | 20 | R  | 15 | 1603.8107      | 802.4093        | 535.2755        |
| 1904.1217      | 952.5648        | 21 | R  | 14 | 1447.6251      | 724.3165        | 483.2136        |
| 2005.2256      | 1003.1168       | 22 | T  | 13 | 1376.5472      | 688.7775        | 459.5210        |
| 2076.3035      | 1038.6557       | 23 | R  | 12 | 1275.4433      | 638.2256        | 425.8197        |
| 2147.3814      | 1074.1947       | 24 | R  | 11 | 1204.3654      | 602.6867        | 402.1271        |
| 2244.4966      | 1122.7523       | 25 | P  | 10 | 1133.2875      | 567.1477        | 378.4345        |
| 2400.6823      | 1200.8451       | 26 | R  | 9  | 1036.1723      | 518.5901        | 346.0627        |
| 2556.8680      | 1278.9380       | 27 | R  | 8  | 879.9866       | 440.4973        | 294.0008        |
| 2627.9459      | 1314.4769       | 28 | R  | 7  | 723.8009       | 362.4044        | 241.9389        |
| 2699.0238      | 1350.0159       | 29 | R  | 6  | 652.7230       | 326.8655        | 218.2463        |
| 2800.1276      | 1400.5678       | 30 | T  | 5  | 581.6451       | 291.3265        | 194.5537        |
| 2937.2669      | 1469.1374       | 31 | H  | 4  | 480.5413       | 240.7746        | 160.8524        |
| 3093.4526      | 1547.2303       | 32 | R  | 3  | 343.4020       | 172.2050        | 115.1393        |
| 3190.5678      | 1595.7879       | 33 | P  | 2  | 187.2163       | 94.1121         | 63.0774         |
|                |                 | 34 | R  | 1  | 90.1011        | 45.5545         | 30.7057         |

# PSRPLTFMGSQTKRV

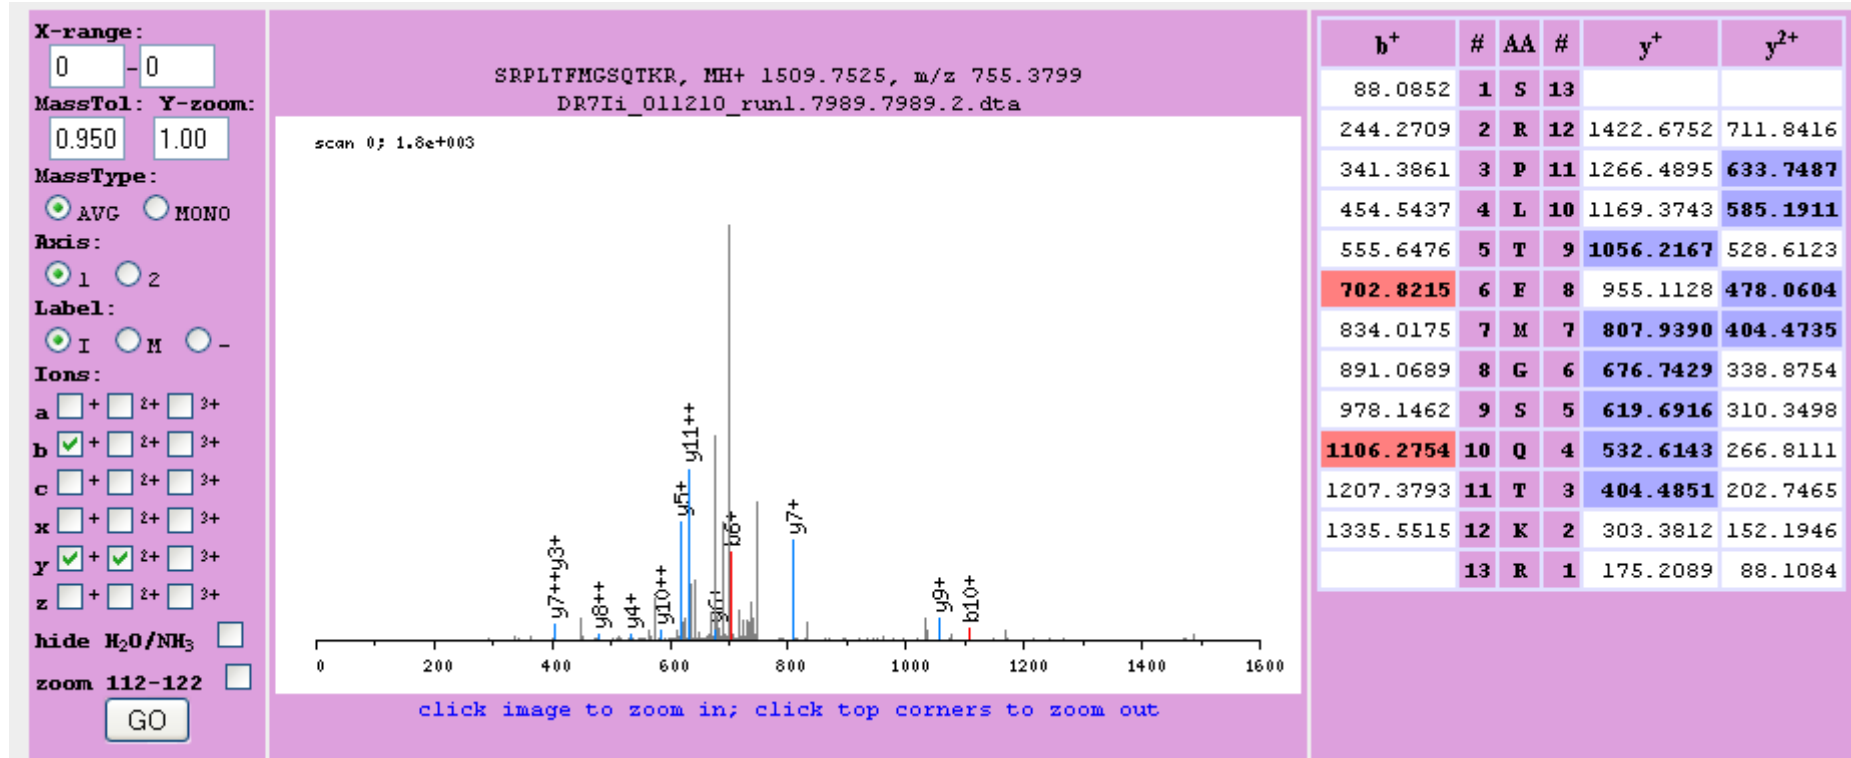

# TRVALLEQQVLI

X-range:

0 - 0

MassTol: Y-zoom:

0.950 1.00

MassType:

AVG  MONO

Axis:

1  2

Label:

I  M  -

Ions:

a  +  2+  3+

b  +  2+  3+

c  +  2+  3+

x  +  2+  3+

y  +  2+  3+

z  +  2+  3+

hide H<sub>2</sub>O/NH<sub>3</sub>

zoom 112-122

GO

RVALLEQQVL, MH+ 1169.3943, m/z 585.2008  
DR7CD80\_012610\_run1.5699.5699.2.dta

scan 0; 4.0e+003

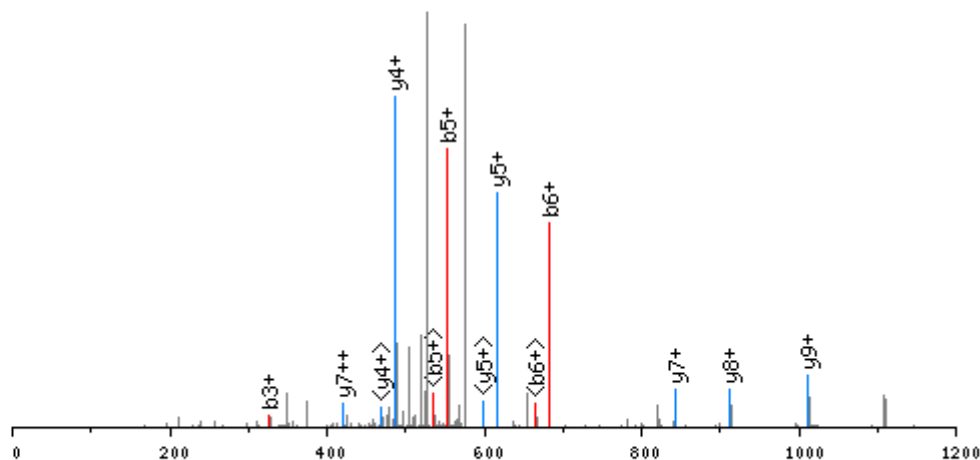

click image to zoom in; click top corners to zoom out

| b <sup>+</sup> | #  | AA | #  | y <sup>+</sup> | y <sup>2+</sup> |
|----------------|----|----|----|----------------|-----------------|
| 157.1936       | 1  | R  | 10 |                |                 |
| 256.3247       | 2  | V  | 9  | 1013.2086      | 507.1083        |
| 327.4026       | 3  | R  | 8  | 914.0775       | 457.5427        |
| 440.5602       | 4  | L  | 7  | 842.9996       | 422.0038        |
| 553.7179       | 5  | L  | 6  | 729.8420       | 365.4250        |
| 682.8318       | 6  | E  | 5  | 616.6843       | 308.8461        |
| 810.9611       | 7  | Q  | 4  | 487.5704       | 244.2891        |
| 939.0903       | 8  | Q  | 3  | 359.4411       | 180.2245        |
| 1038.2213      | 9  | V  | 2  | 231.3119       | 116.1599        |
|                | 10 | L  | 1  | 132.1809       | 66.5944         |



# DFIKSELKKAGGANYDAQTE

X-range:  -

MassTol:  Y-zoom:

MassType:  
 AVG  MONO

Axis:  
 1  2

Label:  
 I  M  -

Ions:  
a  +  2+  3+  
b  +  2+  3+  
c  +  2+  3+  
x  +  2+  3+  
y  +  2+  3+  
z  +  2+  3+

hide H<sub>2</sub>O/NH<sub>3</sub>

zoom

FIKSELKKAGGANYDAQTE, MH+ 2071.2672, m/z 1036.1372  
 DR7Ii\_011210\_run2.5514.5514.2.dta

scan #: 5.3e+002

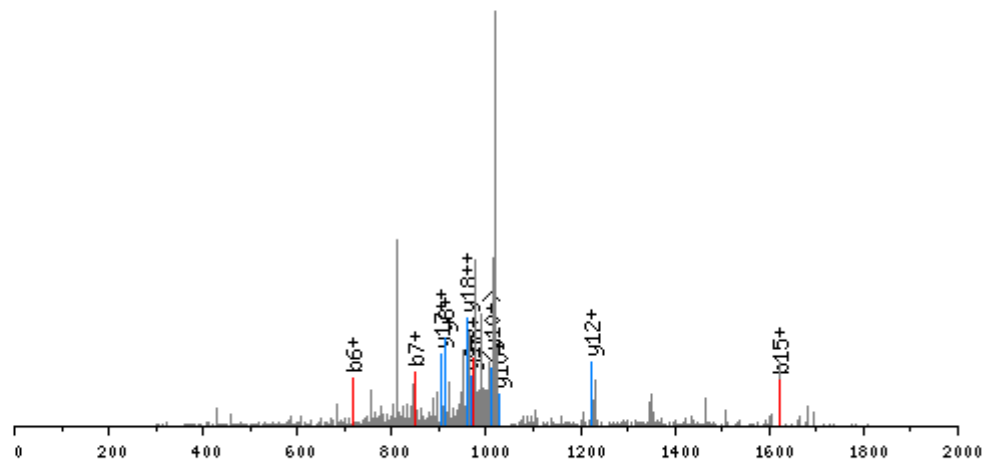

click image to zoom in; click top corners to zoom out

| b <sup>+</sup> | #  | AA | #  | y <sup>+</sup> | y <sup>2+</sup> |
|----------------|----|----|----|----------------|-----------------|
| 148.1818       | 1  | F  | 19 |                |                 |
| 261.3394       | 2  | I  | 18 | 1924.0933      | 962.5506        |
| 389.5117       | 3  | K  | 17 | 1810.9357      | 905.9718        |
| 476.5890       | 4  | S  | 16 | 1682.7634      | 841.8857        |
| 605.7030       | 5  | E  | 15 | 1595.6861      | 798.3470        |
| 718.8606       | 6  | L  | 14 | 1466.5721      | 733.7900        |
| 847.0329       | 7  | K  | 13 | 1353.4145      | 677.2112        |
| 975.2052       | 8  | K  | 12 | 1225.2422      | 613.1251        |
| 1046.2831      | 9  | R  | 11 | 1097.0699      | 549.0389        |
| 1103.3344      | 10 | G  | 10 | 1025.9920      | 513.5000        |
| 1160.3857      | 11 | G  | 9  | 968.9407       | 484.9743        |
| 1231.4636      | 12 | R  | 8  | 911.8894       | 456.4487        |
| 1345.5663      | 13 | N  | 7  | 840.8115       | 420.9097        |
| 1508.7395      | 14 | Y  | 6  | 726.7089       | 363.8584        |
| 1623.8269      | 15 | D  | 5  | 563.5356       | 282.2718        |
| 1694.9048      | 16 | R  | 4  | 448.4482       | 224.7281        |
| 1823.0341      | 17 | Q  | 3  | 377.3703       | 189.1891        |
| 1924.1379      | 18 | T  | 2  | 249.2411       | 125.1245        |
|                | 19 | E  | 1  | 148.1372       | 74.5726         |

# LYDATYETKESKKEDLV

X-range:  -

MassTol:  Y-zoom:

MassType:  
 AVG  MONO

Axis:  
 1  2

Label:  
 I  M  -

Ions:  
a  +  2+  3+  
b  +  2+  3+  
c  +  2+  3+  
x  +  2+  3+  
y  +  2+  3+  
z  +  2+  3+

hide H<sub>2</sub>O/NH<sub>3</sub>

zoom

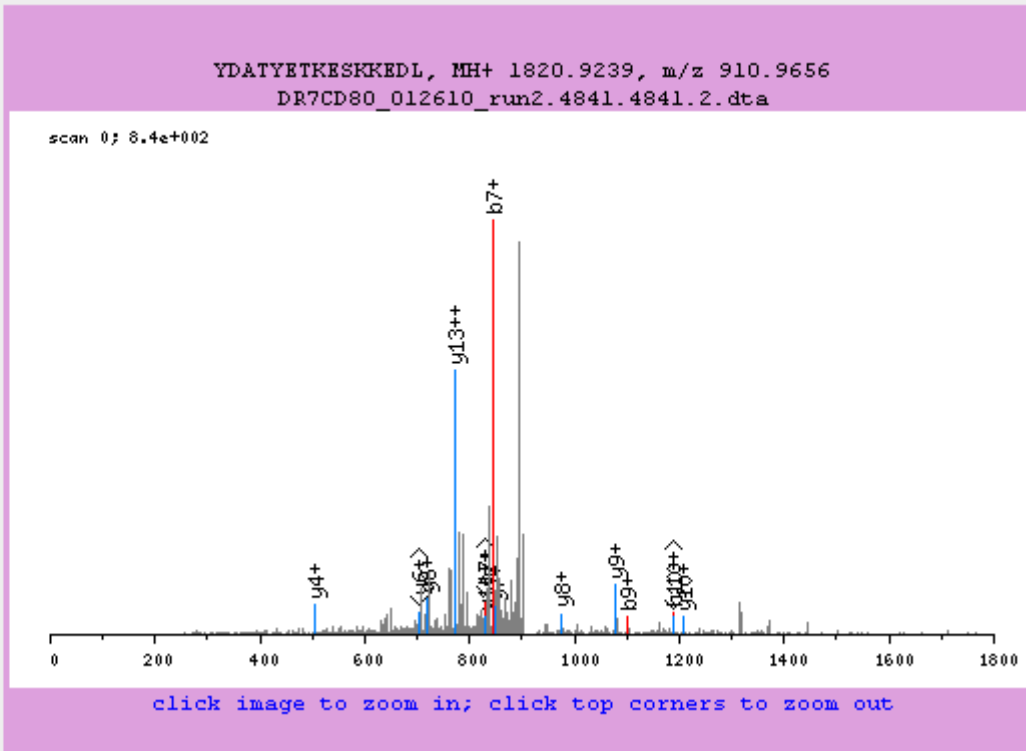

| b <sup>+</sup> | #  | AA | #  | y <sup>+</sup> | y <sup>2+</sup> |
|----------------|----|----|----|----------------|-----------------|
| 164.1812       | 1  | Y  | 15 |                |                 |
| 279.2686       | 2  | D  | 14 | 1657.7507      | 829.3793        |
| 350.3465       | 3  | R  | 13 | 1542.6633      | 771.8356        |
| 451.4504       | 4  | T  | 12 | 1471.5854      | 736.2966        |
| 614.6236       | 5  | Y  | 11 | 1370.4815      | 685.7447        |
| 743.7376       | 6  | E  | 10 | 1207.3082      | 604.1581        |
| 844.8415       | 7  | T  | 9  | 1078.1942      | 539.6011        |
| 973.0138       | 8  | K  | 8  | 977.0904       | 489.0491        |
| 1102.1278      | 9  | E  | 7  | 848.9181       | 424.9630        |
| 1189.2051      | 10 | S  | 6  | 719.8041       | 360.4060        |
| 1317.3773      | 11 | K  | 5  | 632.7268       | 316.8674        |
| 1445.5496      | 12 | K  | 4  | 504.5545       | 252.7812        |
| 1574.6636      | 13 | E  | 3  | 376.3822       | 188.6951        |
| 1689.7510      | 14 | D  | 2  | 247.2683       | 124.1381        |
|                | 15 | L  | 1  | 132.1809       | 66.5944         |

# IWLPLLGPQEGLGQEPGHL

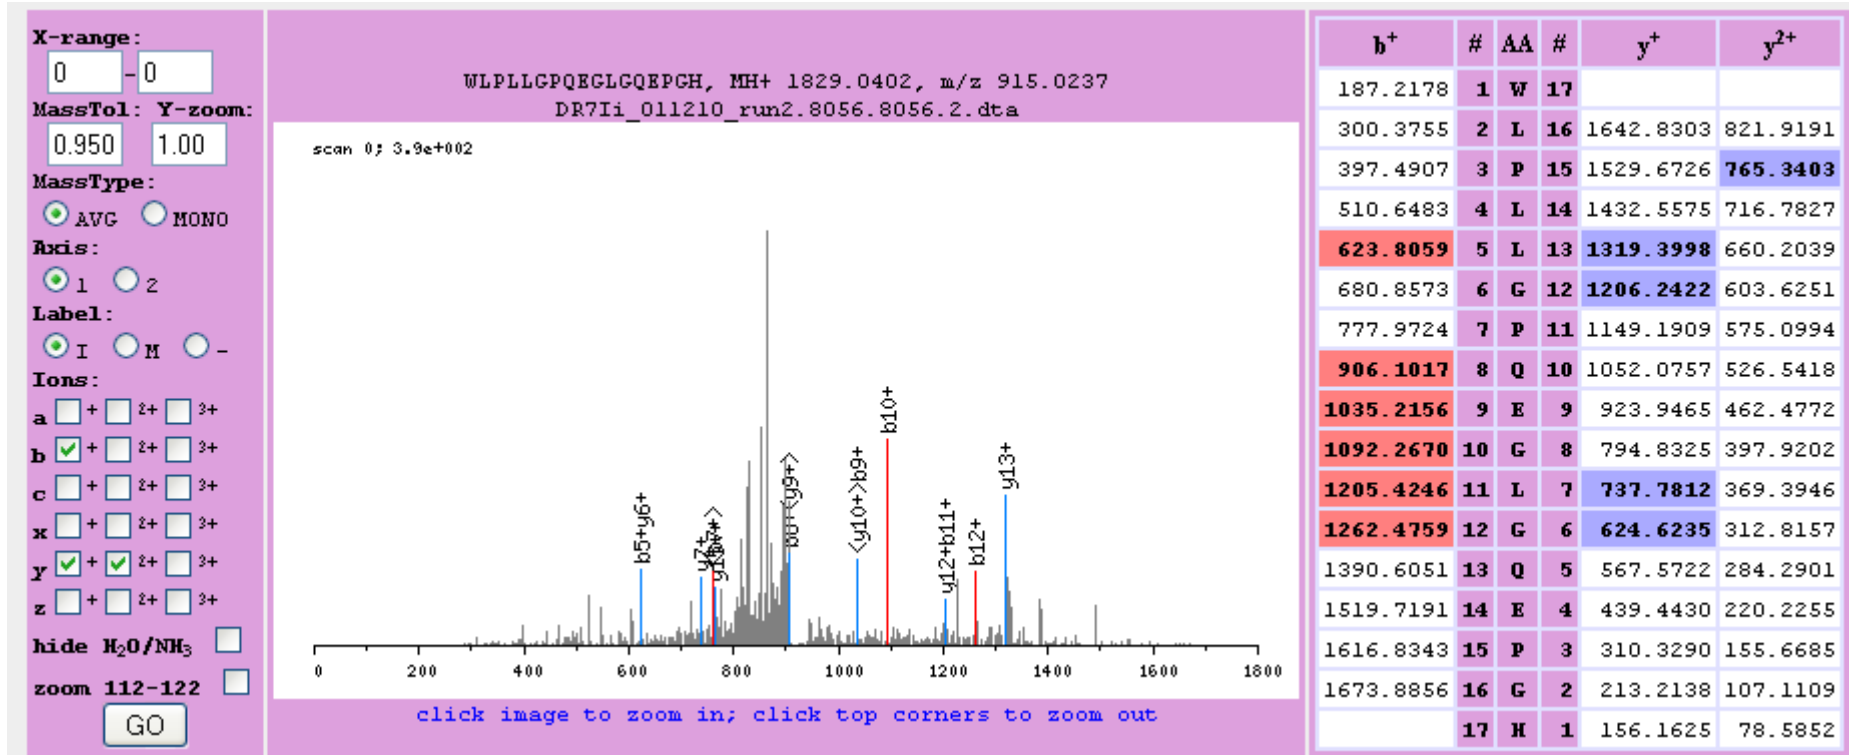

# YLKSHHGEHERPEFI

X-range:  -

MassTol:  Y-zoom:

MassType:  AVG  MONO

Axis:  1  2

Label:  I  M  -

Ions:

a  +  2+  3+

b  +  2+  3+

c  +  2+  3+

x  +  2+  3+

y  +  2+  3+

z  +  2+  3+

hide H<sub>2</sub>O/NH<sub>3</sub>

zoom 112-122

YLKSHHGEHERPEF, MH+ 1603.7163, m/z 802.3618  
DR7Ii\_012110\_run1.4527.4527.2.dta

scan 0; 8.5e+002

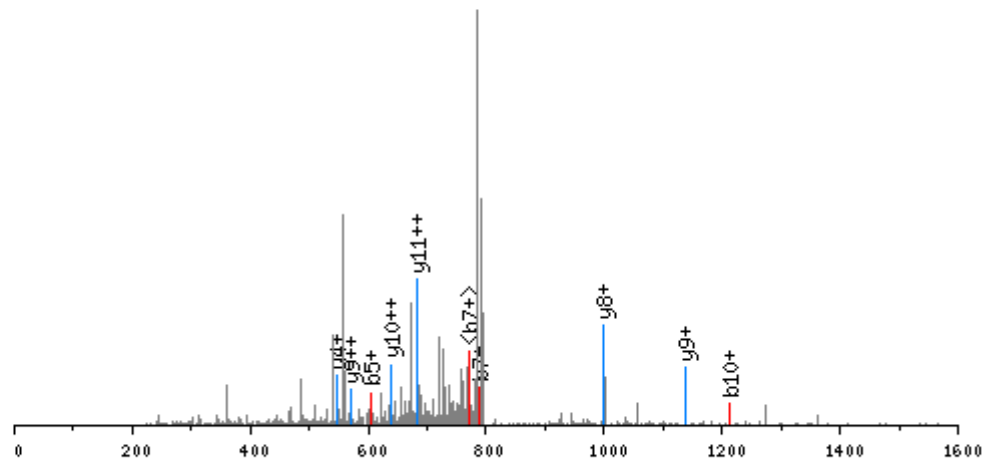

click image to zoom in; click top corners to zoom out

| b <sup>+</sup> | #  | AA | #  | y <sup>+</sup> | y <sup>2+</sup> |
|----------------|----|----|----|----------------|-----------------|
| 114.1656       | 1  | L  | 13 |                |                 |
| 242.3379       | 2  | K  | 12 | 1490.5586      | 745.7833        |
| 329.4152       | 3  | S  | 11 | 1362.3863      | 681.6971        |
| 466.5544       | 4  | H  | 10 | 1275.3090      | 638.1585        |
| 603.6937       | 5  | H  | 9  | 1138.1698      | 569.5889        |
| 660.7450       | 6  | G  | 8  | 1001.0305      | 501.0192        |
| 789.8590       | 7  | E  | 7  | 943.9792       | 472.4936        |
| 926.9983       | 8  | H  | 6  | 814.8652       | 407.9366        |
| 1056.1123      | 9  | E  | 5  | 677.7259       | 339.3669        |
| 1212.2980      | 10 | R  | 4  | 548.6119       | 274.8099        |
| 1309.4131      | 11 | P  | 3  | 392.4262       | 196.7171        |
| 1438.5271      | 12 | E  | 2  | 295.3111       | 148.1595        |
|                | 13 | F  | 1  | 166.1971       | 83.6025         |

# YLLKNKAQFEDRN

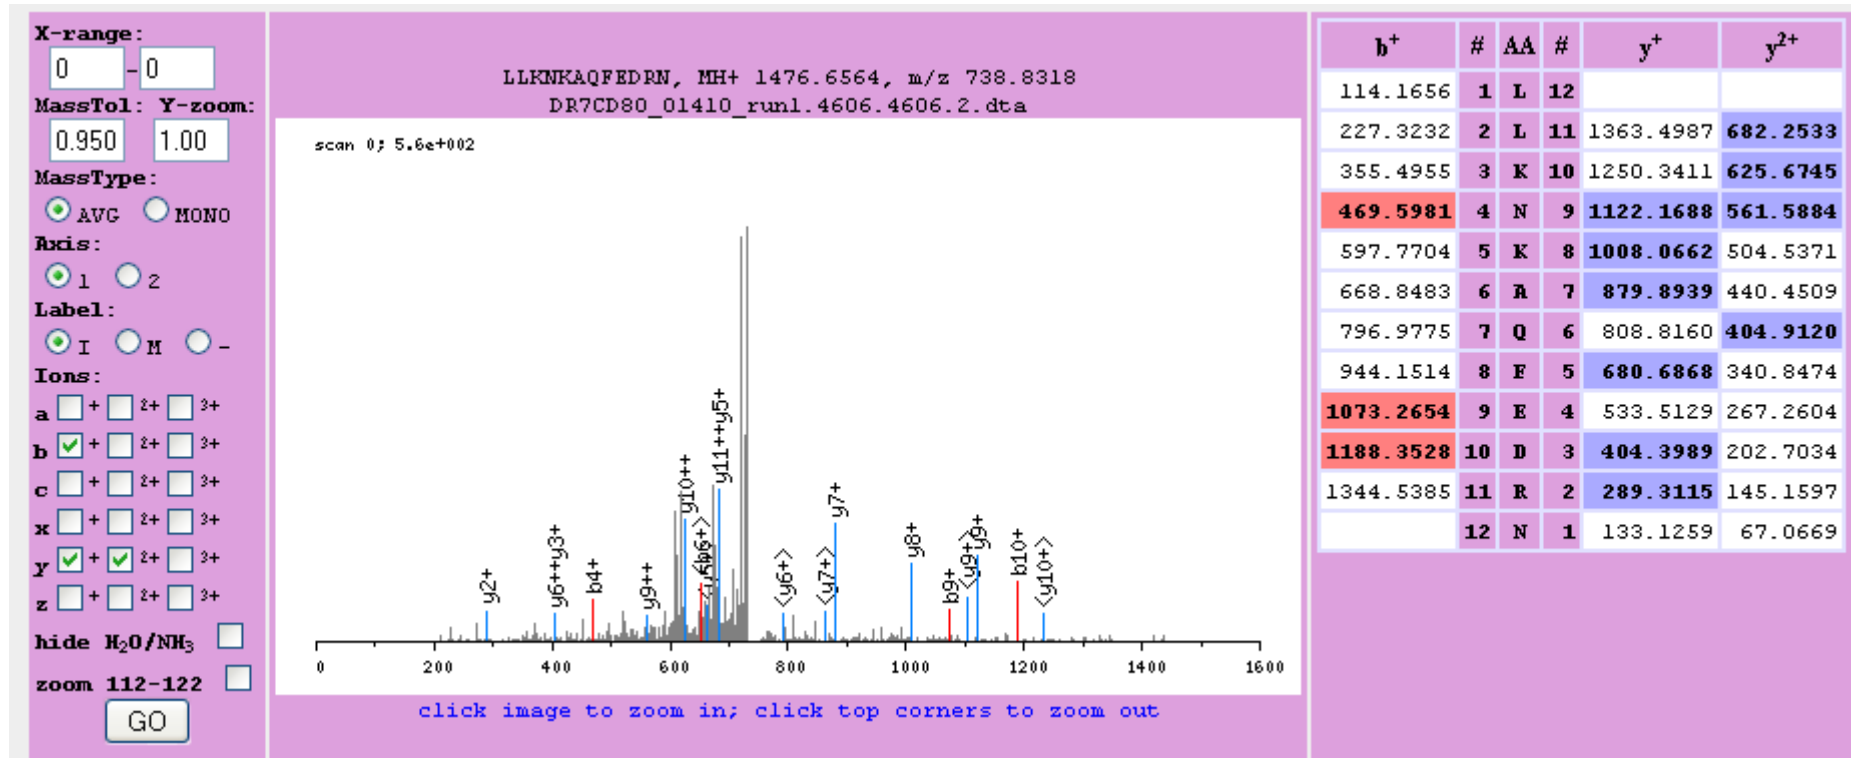

# RTYNRVPLHKPTDWQKKIL

X-range:  -

MassTol:  Y-zoom:

MassType:  AVG  MOMO

Axis:  1  2

Label:  I  M  -

Ions:

a  +  2+  3+

b  +  2+  3+

c  +  2+  3+

x  +  2+  3+

y  +  2+  3+

z  +  2+  3+

hide H<sub>2</sub>O/NH<sub>3</sub>

zoom 112-122

TYNRVPLHKPTDWQKKIL, MH+ 2238.6095, m/z 1119.8084  
DR7Ii\_011210\_run2.6194.6194.2.dta

scan 0: 6.2e+002

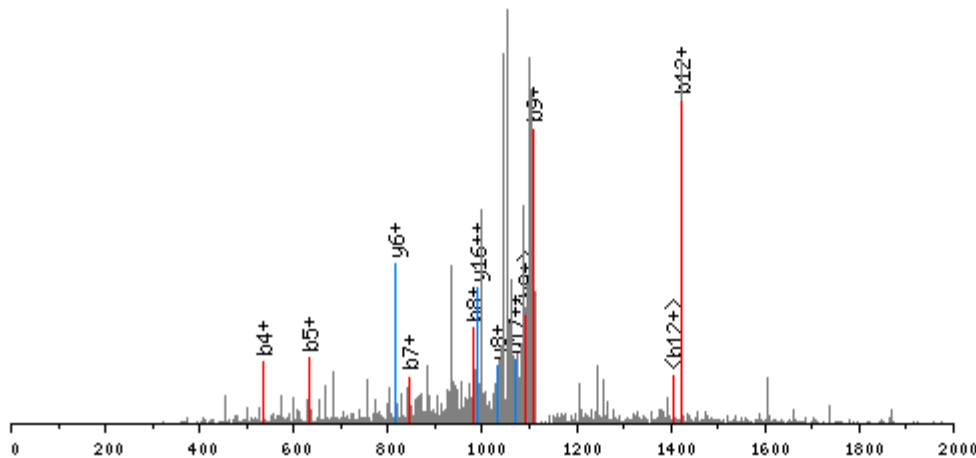

click image to zoom in; click top corners to zoom out

| b <sup>+</sup> | #  | AA | #  | y <sup>+</sup> | y <sup>2+</sup> |
|----------------|----|----|----|----------------|-----------------|
| 102.1118       | 1  | T  | 18 |                |                 |
| 265.2851       | 2  | Y  | 17 | 2137.5057      | 1069.2568       |
| 379.3877       | 3  | N  | 16 | 1974.3324      | 987.6702        |
| 535.5734       | 4  | R  | 15 | 1860.2298      | 930.6188        |
| 634.7045       | 5  | V  | 14 | 1704.0441      | 852.5260        |
| 731.8196       | 6  | P  | 13 | 1604.9130      | 802.9605        |
| 844.9773       | 7  | L  | 12 | 1507.7978      | 754.4029        |
| 982.1166       | 8  | H  | 11 | 1394.6402      | 697.8241        |
| 1110.2888      | 9  | K  | 10 | 1257.5009      | 629.2544        |
| 1207.4040      | 10 | P  | 9  | 1129.3286      | 565.1683        |
| 1308.5079      | 11 | T  | 8  | 1032.2135      | 516.6107        |
| 1423.5953      | 12 | D  | 7  | 931.1096       | 466.0588        |
| 1609.8052      | 13 | W  | 6  | 816.0222       | 408.5151        |
| 1737.9344      | 14 | Q  | 5  | 629.8123       | 315.4101        |
| 1866.1067      | 15 | K  | 4  | 501.6831       | 251.3455        |
| 1994.2790      | 16 | K  | 3  | 373.5108       | 187.2594        |
| 2107.4366      | 17 | I  | 2  | 245.3385       | 123.1732        |
|                | 18 | L  | 1  | 132.1809       | 66.5944         |

# RVAVEAKNPADLPKL

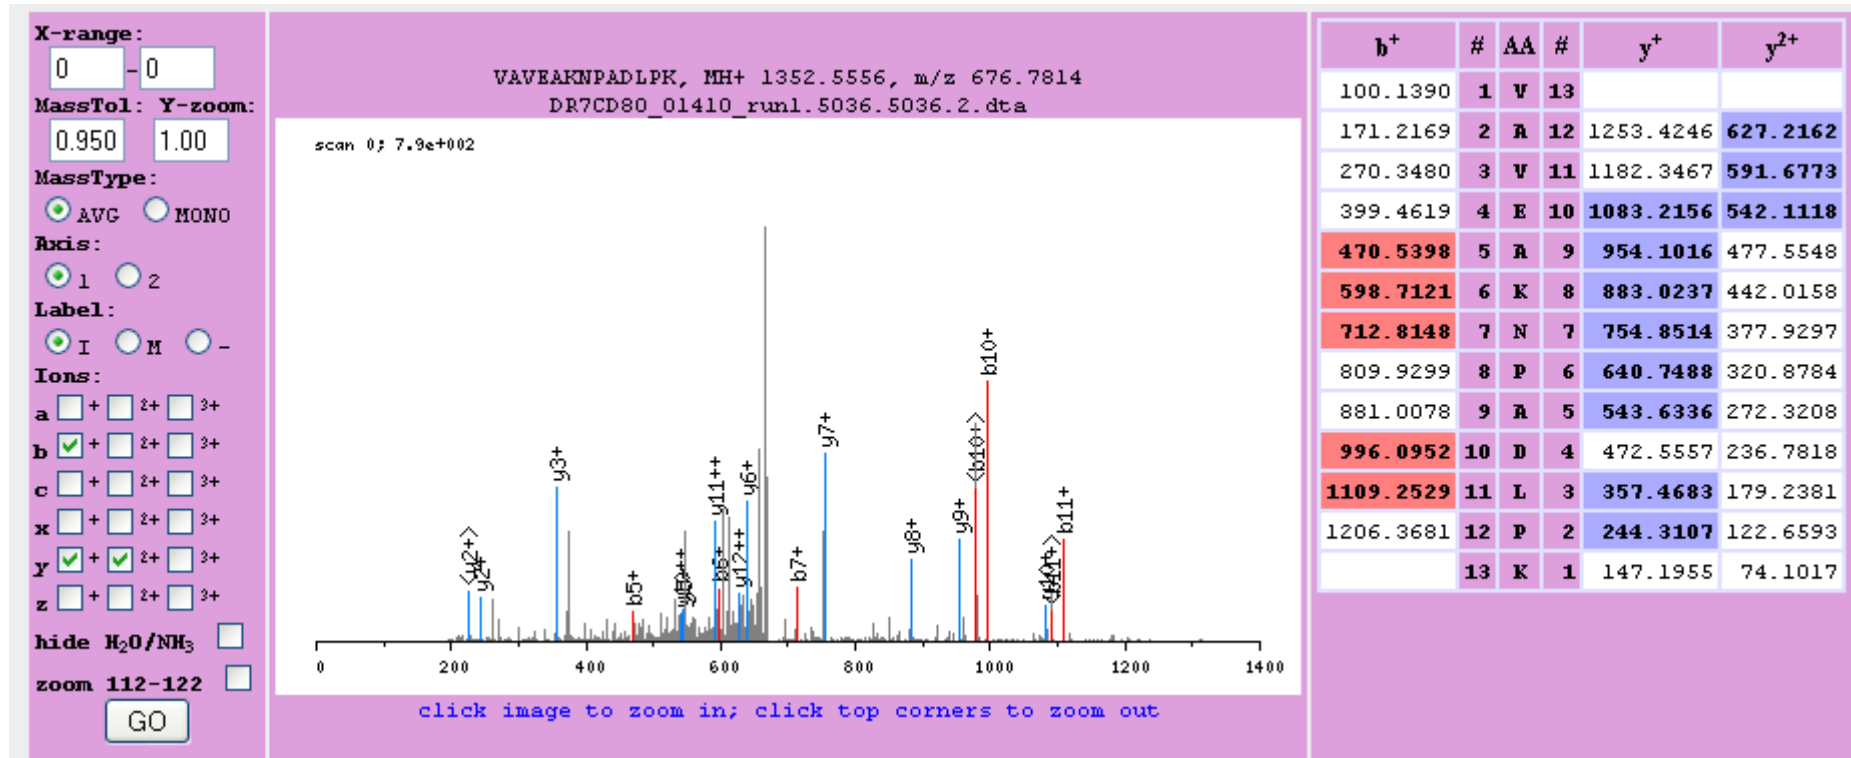

# NVGKLLKGIDRYNPENLA

X-range:  -

MassTol:  Y-zoom:

MassType:  
 AVG  MONO

Axis:  
 1  2

Label:  
 I  M  -

Ions:  
a  +  2+  3+  
b  +  2+  3+  
c  +  2+  3+  
x  +  2+  3+  
y  +  2+  3+  
z  +  2+  3+

hide H<sub>2</sub>O/NH<sub>3</sub>

zoom

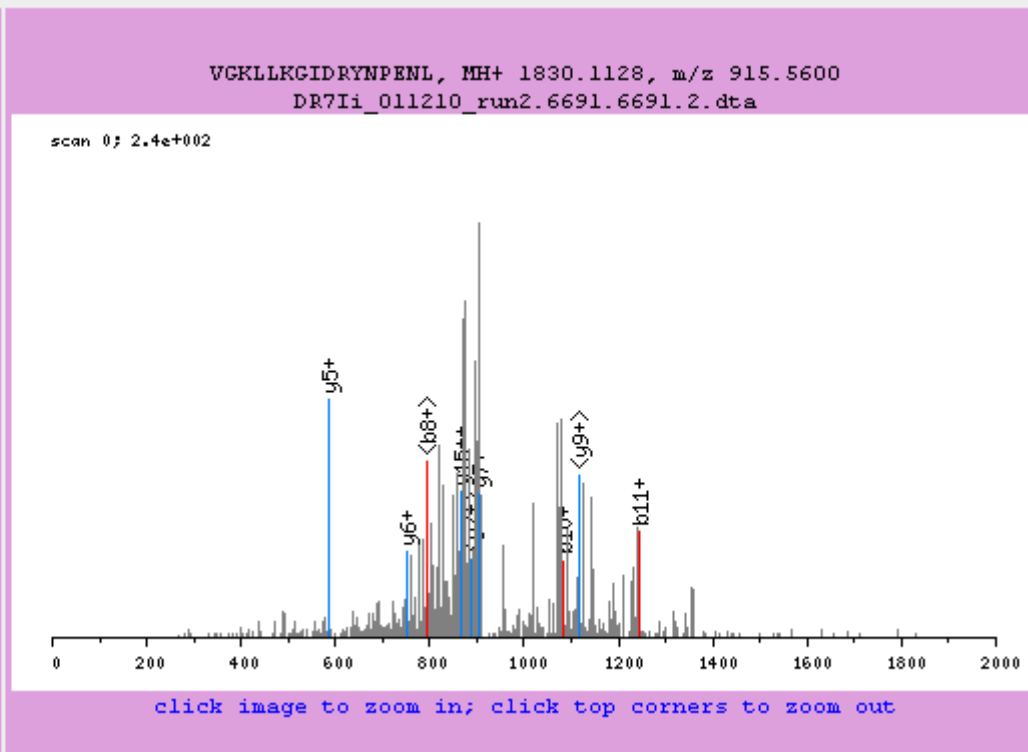

| b <sup>+</sup> | #  | AA | #  | y <sup>+</sup> | y <sup>2+</sup> |
|----------------|----|----|----|----------------|-----------------|
| 100.1390       | 1  | V  | 16 |                |                 |
| 157.1903       | 2  | G  | 15 | 1730.9818      | 865.9949        |
| 285.3626       | 3  | K  | 14 | 1673.9304      | 837.4692        |
| 398.5202       | 4  | L  | 13 | 1545.7582      | 773.3831        |
| 511.6779       | 5  | L  | 12 | 1432.6005      | 716.8042        |
| 639.8502       | 6  | K  | 11 | 1319.4429      | 660.2254        |
| 696.9015       | 7  | G  | 10 | 1191.2706      | 596.1393        |
| 810.0591       | 8  | I  | 9  | 1134.2193      | 567.6136        |
| 925.1465       | 9  | D  | 8  | 1021.0616      | 511.0348        |
| 1081.3322      | 10 | R  | 7  | 905.9742       | 453.4911        |
| 1244.5055      | 11 | Y  | 6  | 749.7886       | 375.3983        |
| 1358.6081      | 12 | N  | 5  | 586.6153       | 293.8116        |
| 1455.7233      | 13 | P  | 4  | 472.5127       | 236.7603        |
| 1584.8373      | 14 | E  | 3  | 375.3975       | 188.2027        |
| 1698.9399      | 15 | N  | 2  | 246.2835       | 123.6457        |
|                | 16 | L  | 1  | 132.1809       | 66.5944         |



# KIKIIAPPKRRKYSV

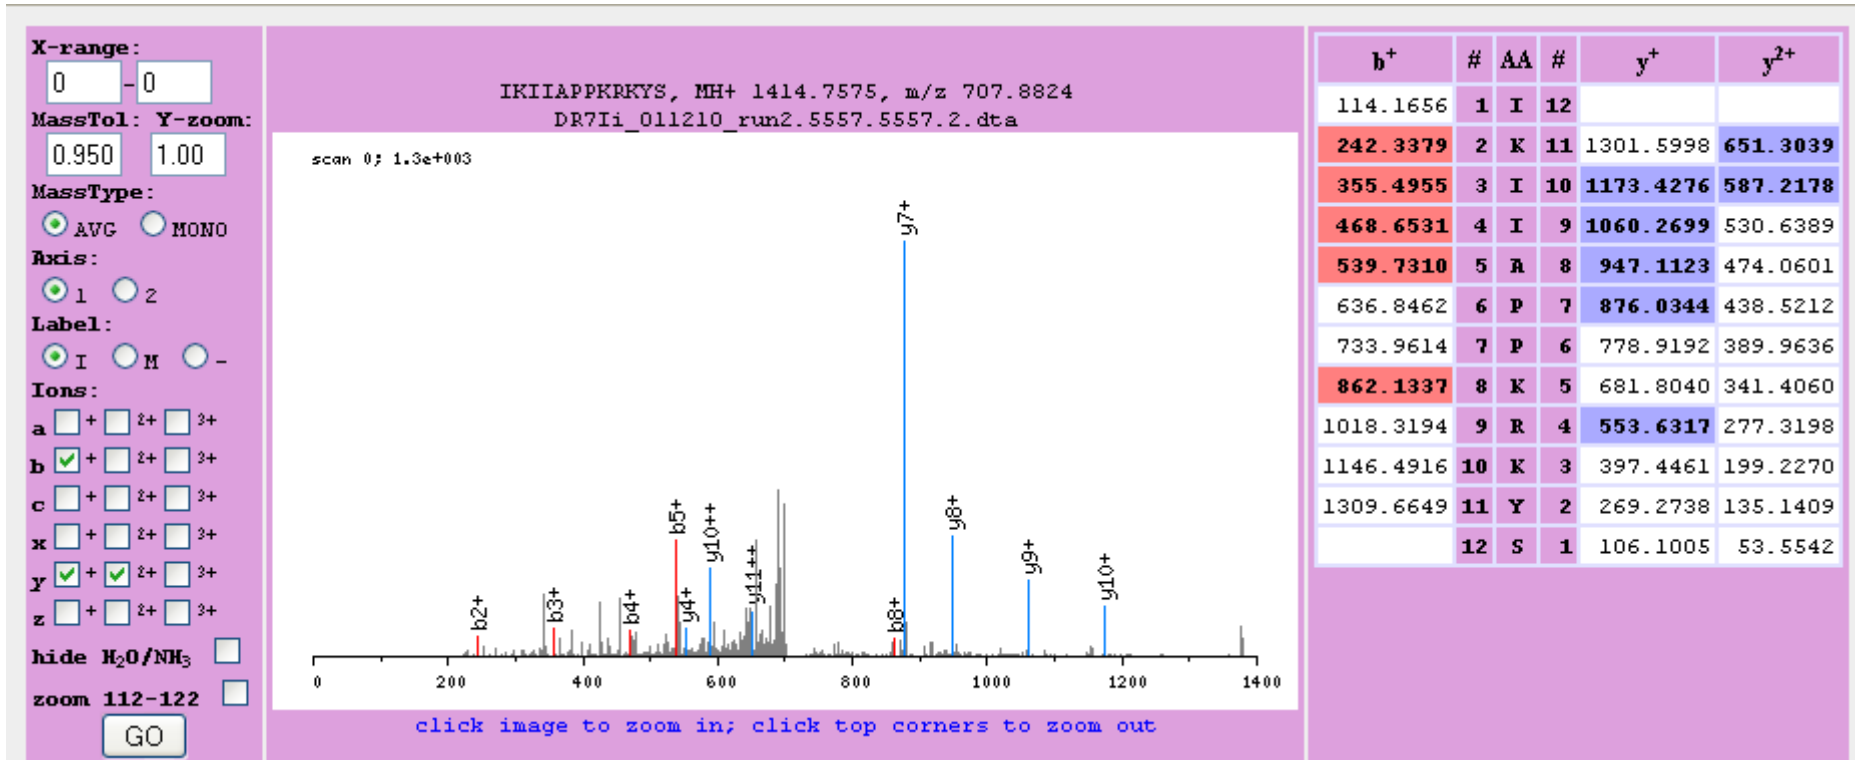

# TPSALAIENANVLARYASICQQNGIVPIV

X-range:  -

MassTol: Y-zoom:

MassType:  AVG  MOMO

Axis:  1  2

Label:  I  M  -

Ions:

a  +  2+  3+

b  +  2+  3+

c  +  2+  3+

x  +  2+  3+

y  +  2+  3+

z  +  2+  3+

hide H<sub>2</sub>O/NH<sub>3</sub>

zoom 112-122

PSALAIENANVLARYASICQQNGIVPI, MH+ 2940.3968, m/z 1470.7020  
DR7Ii\_011210\_run2.6798.6798.2.dta

scan 0; 4.9e+002

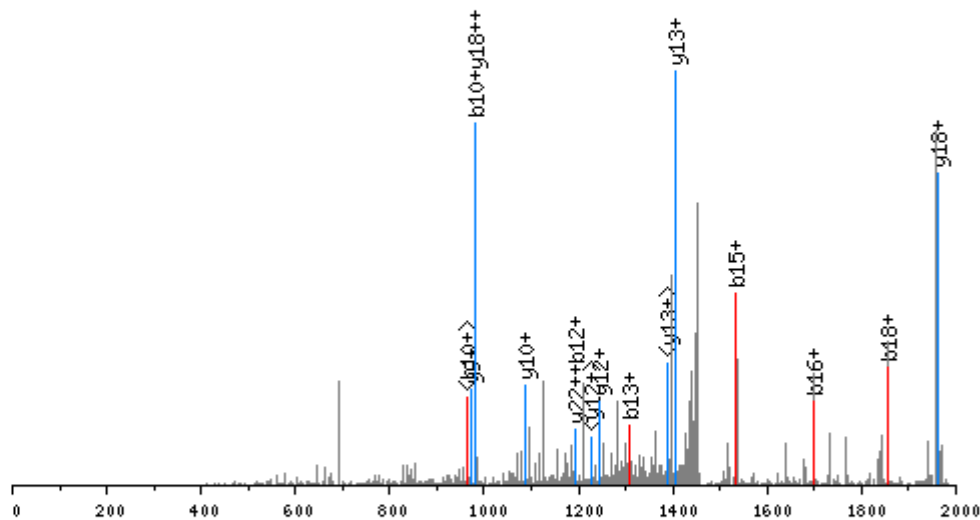

click image to zoom in; click top corners to zoom out

| b <sup>+</sup> | #  | AA | #  | y <sup>+</sup> | y <sup>2+</sup> |
|----------------|----|----|----|----------------|-----------------|
| 98.1231        | 1  | P  | 28 |                |                 |
| 185.2004       | 2  | S  | 27 | 2843.2816      | 1422.1448       |
| 256.2783       | 3  | R  | 26 | 2756.2043      | 1378.6061       |
| 369.4360       | 4  | L  | 25 | 2685.1264      | 1343.0672       |
| 440.5139       | 5  | R  | 24 | 2571.9688      | 1286.4883       |
| 553.6715       | 6  | I  | 23 | 2500.8909      | 1250.9494       |
| 666.8291       | 7  | L  | 22 | 2387.7332      | 1194.3706       |
| 795.9431       | 8  | E  | 21 | 2274.5756      | 1137.7918       |
| 910.0458       | 9  | N  | 20 | 2145.4616      | 1073.2348       |
| 981.1237       | 10 | R  | 19 | 2031.3590      | 1016.1834       |
| 1095.2263      | 11 | N  | 18 | 1960.2811      | 980.6445        |
| 1194.3574      | 12 | V  | 17 | 1846.1784      | 923.5932        |
| 1307.5150      | 13 | L  | 16 | 1747.0474      | 874.0276        |
| 1378.5929      | 14 | R  | 15 | 1633.8897      | 817.4488        |
| 1534.7786      | 15 | R  | 14 | 1562.8118      | 781.9099        |
| 1697.9518      | 16 | Y  | 13 | 1406.6261      | 703.8170        |
| 1769.0297      | 17 | R  | 12 | 1243.4529      | 622.2304        |
| 1856.1070      | 18 | S  | 11 | 1172.3750      | 586.6915        |
| 1969.2647      | 19 | I  | 10 | 1085.2977      | 543.1528        |
| 2072.4076      | 20 | C  | 9  | 972.1400       | 486.5740        |
| 2200.5368      | 21 | Q  | 8  | 868.9971       | 435.0025        |
| 2328.6660      | 22 | Q  | 7  | 740.8679       | 370.9379        |
| 2442.7687      | 23 | N  | 6  | 612.7387       | 306.8733        |
| 2499.8200      | 24 | G  | 5  | 498.6361       | 249.8220        |
| 2612.9776      | 25 | I  | 4  | 441.5847       | 221.2963        |
| 2712.1087      | 26 | V  | 3  | 328.4271       | 164.7175        |
| 2809.2239      | 27 | P  | 2  | 229.2960       | 115.1520        |
|                | 28 | I  | 1  | 132.1809       | 66.5944         |

# YKQPGGITNQFLDSLKHRE

X-range:  -

MassTol:  Y-zoom:

MassType:  AVG  MONO

Axis:  1  2

Label:  I  M  -

Ions:

a  +  2+  3+

b  +  2+  3+

c  +  2+  3+

x  +  2+  3+

y  +  2+  3+

z  +  2+  3+

hide H<sub>2</sub>O/NH<sub>3</sub>

zoom 112-122

KQPGGITNQFLDSLKHRR, MH+ 2053.3446, m/z 1027.1760  
DR7CD80\_012610\_run2.5509.5509.2.dta

scan 0: 2.9e+003

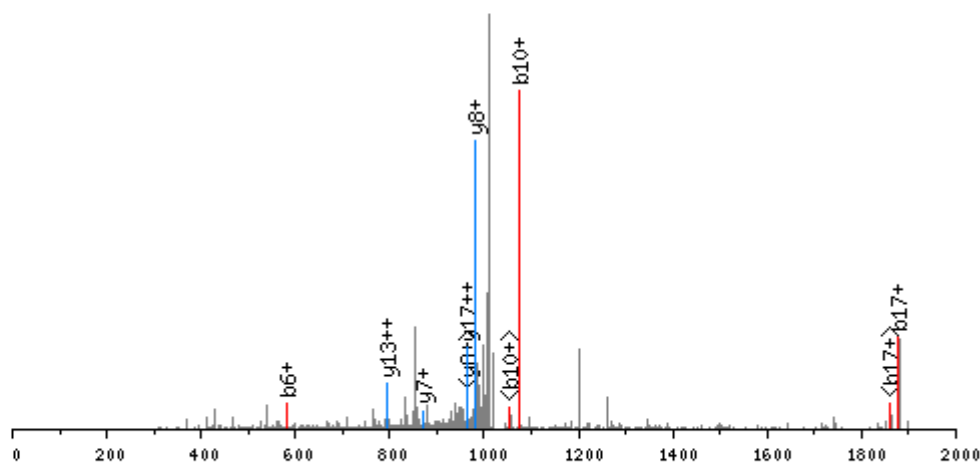

click image to zoom in; click top corners to zoom out

| b <sup>+</sup> | #  | AA | #  | y <sup>+</sup> | y <sup>2+</sup> |
|----------------|----|----|----|----------------|-----------------|
| 129.1802       | 1  | K  | 18 |                |                 |
| 257.3094       | 2  | Q  | 17 | 1925.1724      | 963.0901        |
| 354.4246       | 3  | P  | 16 | 1797.0431      | 899.0255        |
| 411.4759       | 4  | G  | 15 | 1699.9280      | 850.4679        |
| 468.5273       | 5  | G  | 14 | 1642.8766      | 821.9423        |
| 581.6849       | 6  | I  | 13 | 1585.8253      | 793.4166        |
| 682.7888       | 7  | T  | 12 | 1472.6677      | 736.8378        |
| 796.8914       | 8  | N  | 11 | 1371.5638      | 686.2859        |
| 925.0206       | 9  | Q  | 10 | 1257.4612      | 629.2345        |
| 1072.1945      | 10 | F  | 9  | 1129.3319      | 565.1699        |
| 1185.3521      | 11 | L  | 8  | 982.1581       | 491.5830        |
| 1298.5098      | 12 | L  | 7  | 869.0004       | 435.0042        |
| 1413.5972      | 13 | D  | 6  | 755.8428       | 378.4254        |
| 1500.6745      | 14 | S  | 5  | 640.7554       | 320.8817        |
| 1613.8321      | 15 | L  | 4  | 553.6781       | 277.3430        |
| 1742.0044      | 16 | K  | 3  | 440.5205       | 220.7642        |
| 1879.1437      | 17 | H  | 2  | 312.3482       | 156.6781        |
|                | 18 | R  | 1  | 175.2089       | 88.1084         |

# LRVRGEVAPDAKSFV

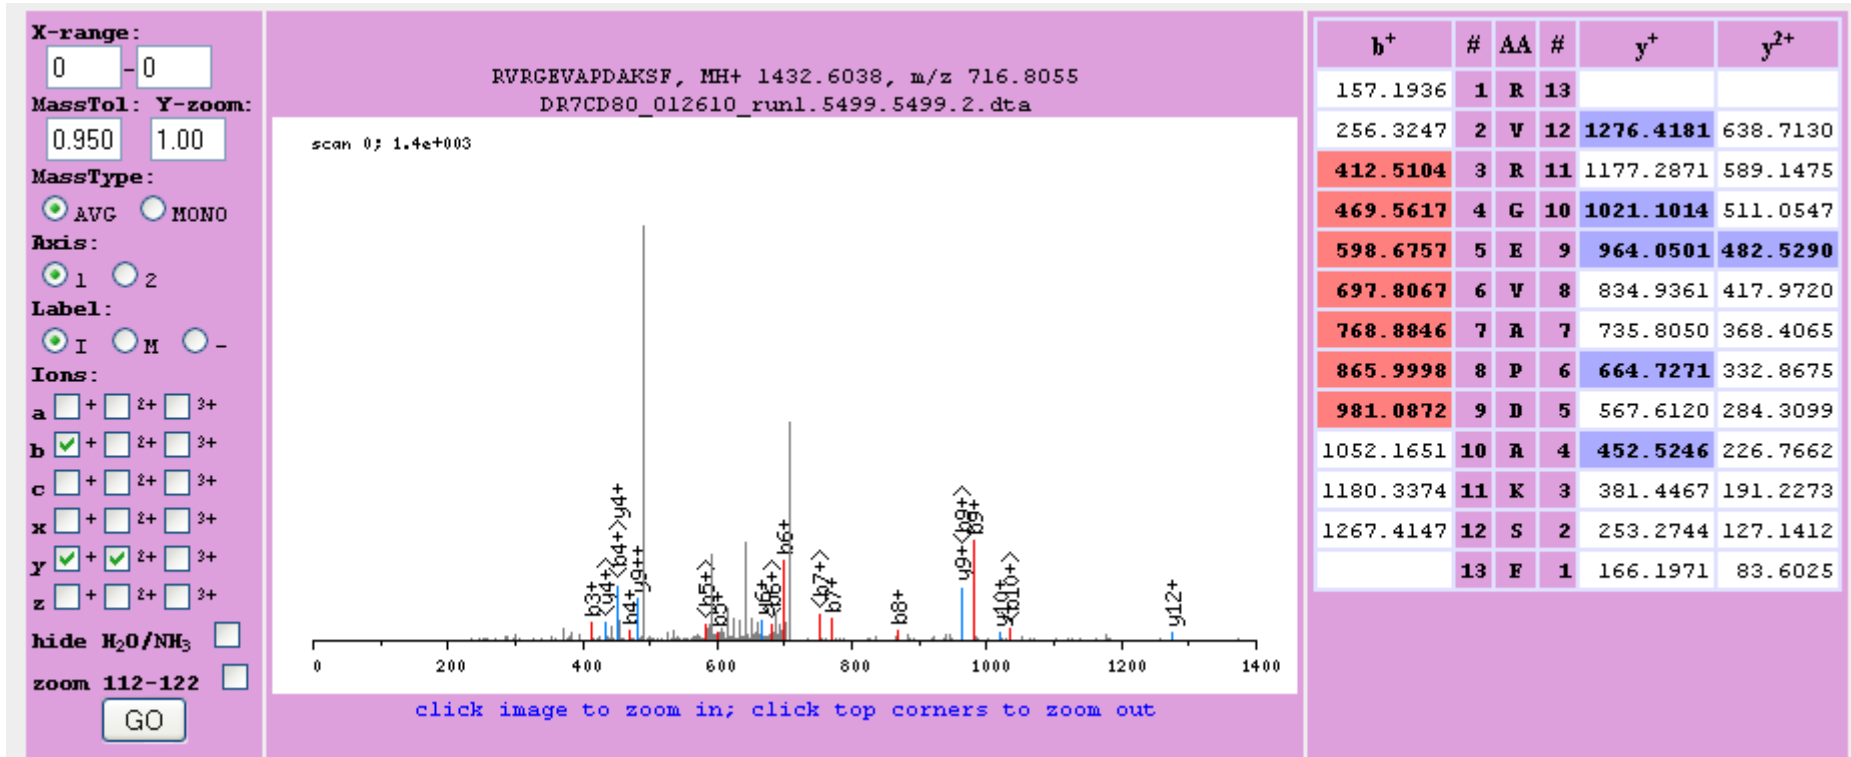

# QWLGSSWPGYVRPLPPAAIESP

**X-range:**  
 -

**MassTol:**  **Y-zoom:**

**MassType:**  
 AVG  MONO

**Axis:**  
 1  2

**Label:**  
 I  M  -

**Ions:**

a  +  2+  3+

b  +  2+  3+

c  +  2+  3+

x  +  2+  3+

y  +  2+  3+

z  +  2+  3+

**hide H<sub>2</sub>O/NH<sub>3</sub>**

**zoom 112-122**

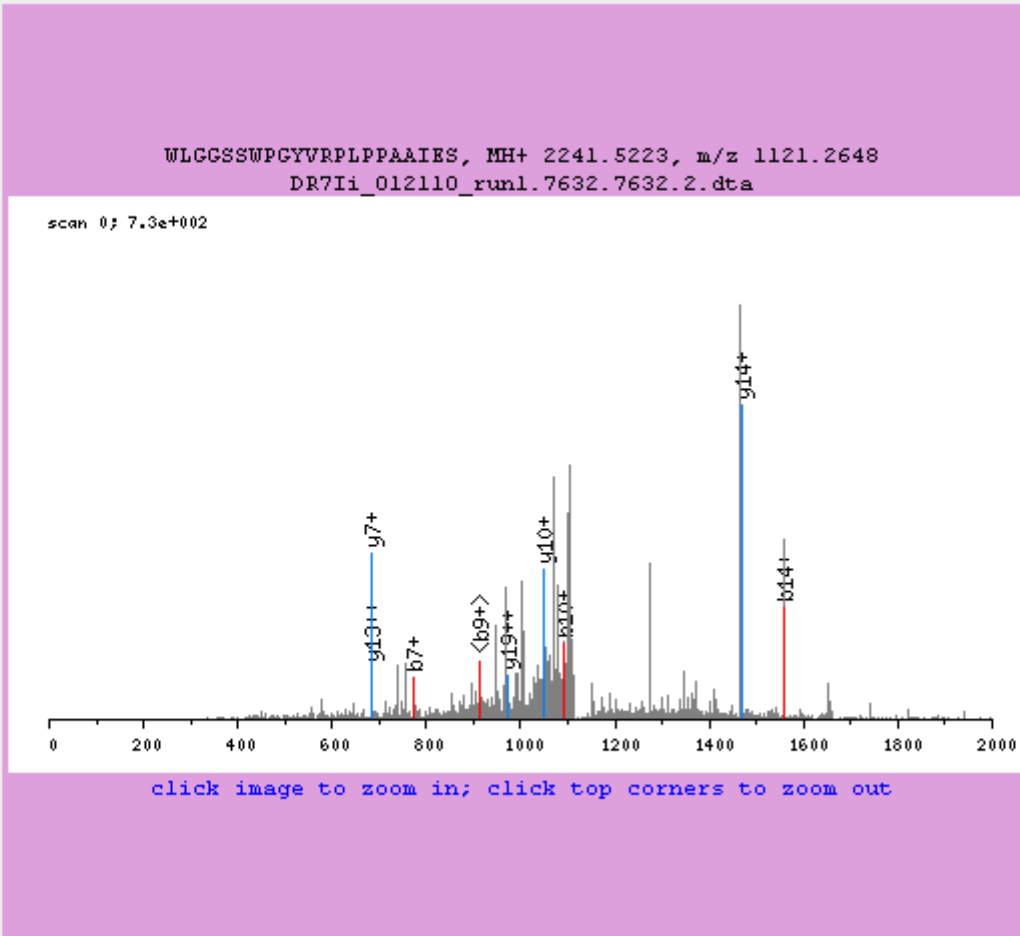

| b <sup>+</sup> | #  | AA | #  | y <sup>+</sup> | y <sup>2+</sup> |
|----------------|----|----|----|----------------|-----------------|
| 187.2178       | 1  | W  | 21 |                |                 |
| 300.3755       | 2  | L  | 20 | 2055.3124      | 1028.1602       |
| 357.4268       | 3  | G  | 19 | 1942.1548      | 971.5813        |
| 414.4781       | 4  | G  | 18 | 1885.1034      | 943.0557        |
| 501.5554       | 5  | S  | 17 | 1828.0521      | 914.5300        |
| 588.6327       | 6  | S  | 16 | 1740.9748      | 870.9914        |
| 774.8426       | 7  | W  | 15 | 1653.8975      | 827.4527        |
| 871.9578       | 8  | P  | 14 | 1467.6876      | 734.3478        |
| 929.0091       | 9  | G  | 13 | 1370.5724      | 685.7902        |
| 1092.1824      | 10 | Y  | 12 | 1313.5211      | 657.2645        |
| 1191.3134      | 11 | V  | 11 | 1150.3479      | 575.6779        |
| 1347.4991      | 12 | R  | 10 | 1051.2168      | 526.1124        |
| 1444.6143      | 13 | P  | 9  | 895.0311       | 448.0195        |
| 1557.7719      | 14 | L  | 8  | 797.9159       | 399.4619        |
| 1654.8871      | 15 | P  | 7  | 684.7583       | 342.8831        |
| 1752.0023      | 16 | P  | 6  | 587.6431       | 294.3255        |
| 1823.0802      | 17 | R  | 5  | 490.5279       | 245.7679        |
| 1894.1581      | 18 | R  | 4  | 419.4500       | 210.2290        |
| 2007.3157      | 19 | I  | 3  | 348.3721       | 174.6900        |
| 2136.4297      | 20 | E  | 2  | 235.2145       | 118.1112        |
|                | 21 | S  | 1  | 106.1005       | 53.5542         |

# LRQKAEADKNDKSVKDLV

**X-range:**  
 -   
**MassTol:**  **Y-zoom:**   
**MassType:**  
 AVG  MONO  
**Axis:**  
 1  2  
**Label:**  
 I  M  -  
**Ions:**  
a  +  2+  3+  
b  +  2+  3+  
c  +  2+  3+  
x  +  2+  3+  
y  +  2+  3+  
z  +  2+  3+  
hide H<sub>2</sub>O/NH<sub>3</sub>   
zoom

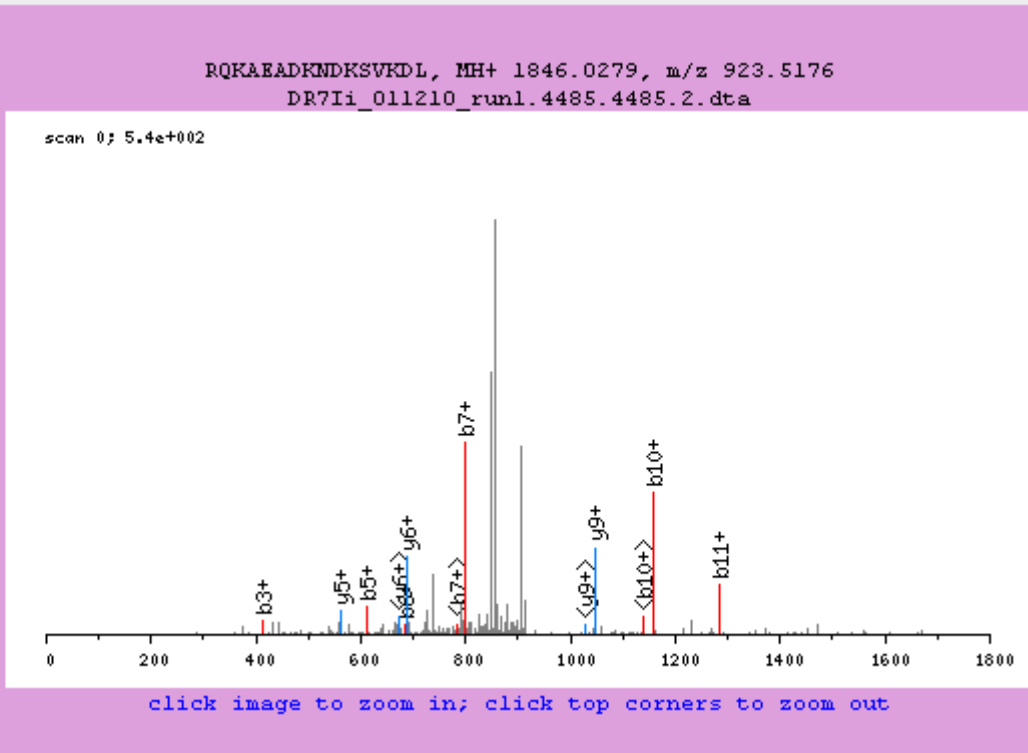

| b <sup>+</sup> | #  | AA | #  | y <sup>+</sup> | y <sup>2+</sup> |
|----------------|----|----|----|----------------|-----------------|
| 157.1936       | 1  | R  | 16 |                |                 |
| 285.3228       | 2  | Q  | 15 | 1689.8422      | 845.4251        |
| 413.4951       | 3  | K  | 14 | 1561.7130      | 781.3604        |
| 484.5730       | 4  | R  | 13 | 1433.5407      | 717.2743        |
| 613.6870       | 5  | E  | 12 | 1362.4628      | 681.7354        |
| 684.7649       | 6  | R  | 11 | 1233.3488      | 617.1784        |
| 799.8523       | 7  | D  | 10 | 1162.2709      | 581.6394        |
| 928.0246       | 8  | K  | 9  | 1047.1835      | 524.0957        |
| 1042.1272      | 9  | N  | 8  | 919.0112       | 460.0096        |
| 1157.2146      | 10 | D  | 7  | 804.9086       | 402.9583        |
| 1285.3869      | 11 | K  | 6  | 689.8212       | 345.4146        |
| 1372.4642      | 12 | S  | 5  | 561.6489       | 281.3284        |
| 1471.5953      | 13 | V  | 4  | 474.5716       | 237.7898        |
| 1599.7675      | 14 | K  | 3  | 375.4405       | 188.2242        |
| 1714.8549      | 15 | D  | 2  | 247.2683       | 124.1381        |
|                | 16 | L  | 1  | 132.1809       | 66.5944         |

# LIGRTWNDPSVQQDIKFLP

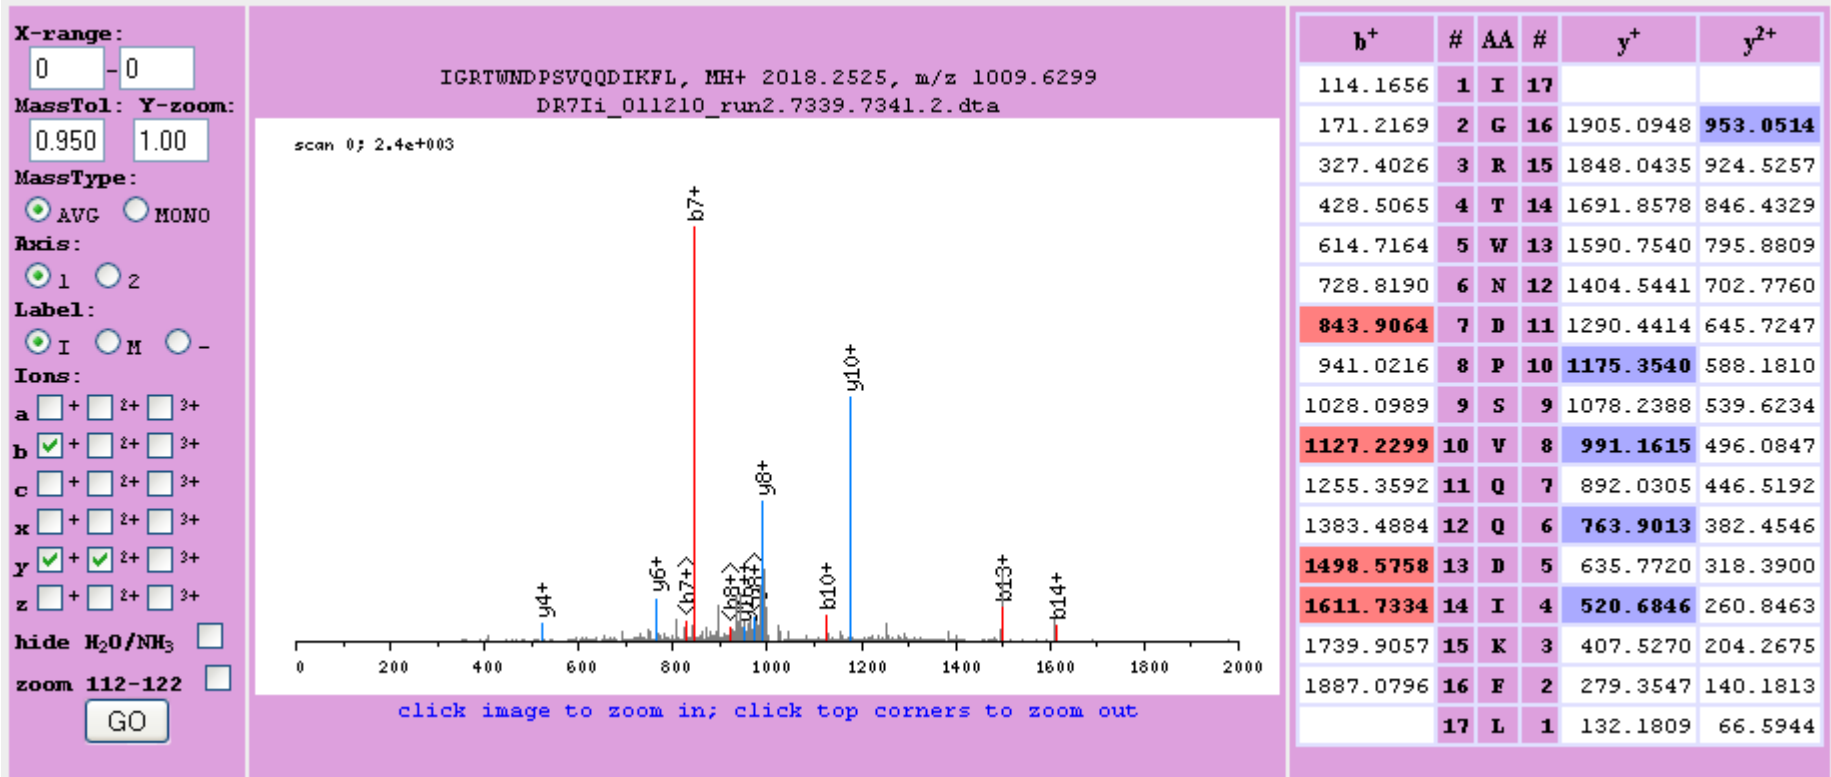

# VSLWTLTSGTSSVNSPTKCIKTV

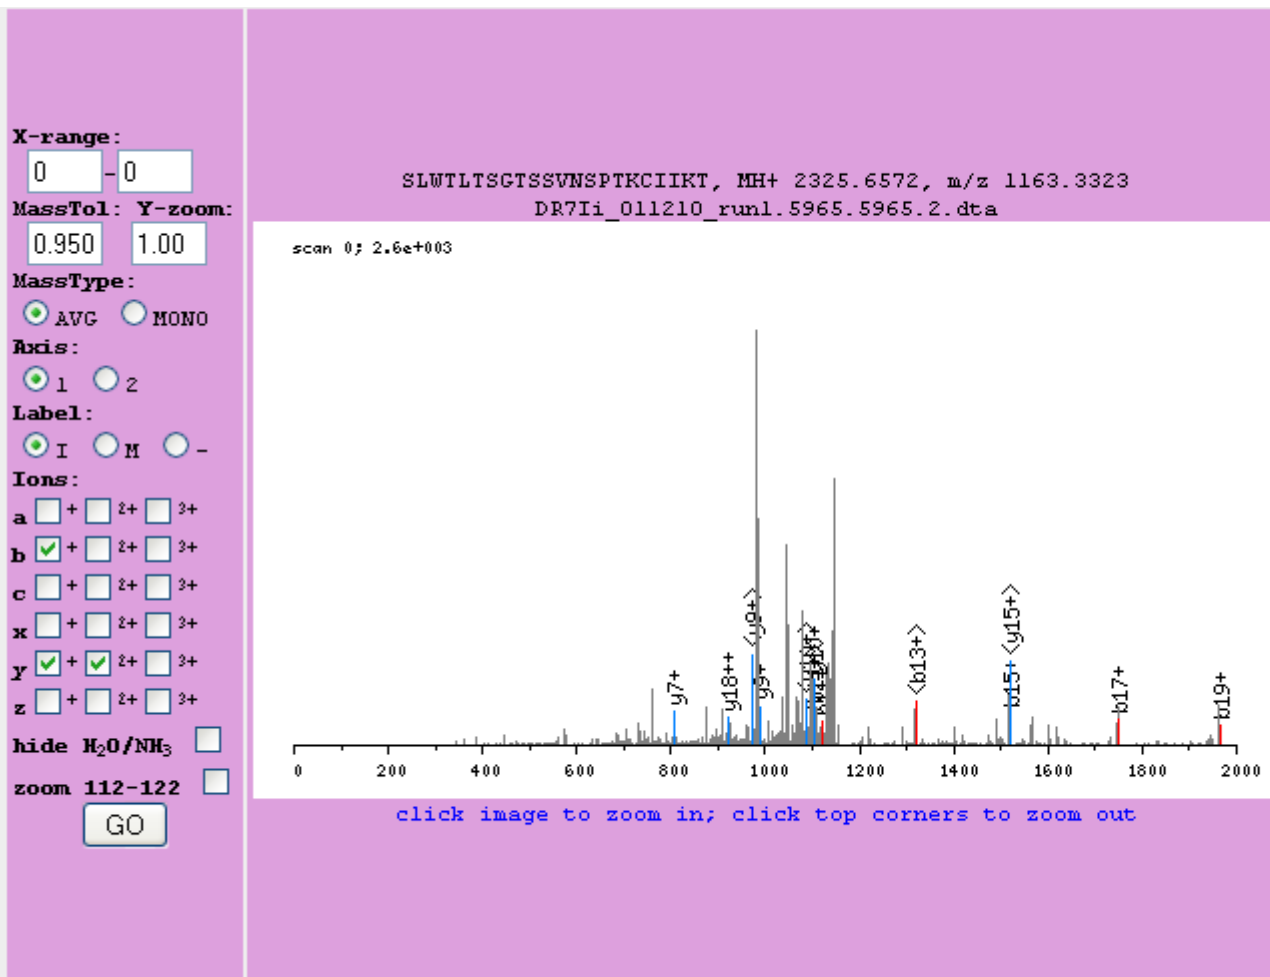

| b <sup>+</sup>   | #  | AA | #  | y <sup>+</sup>   | y <sup>2+</sup> |
|------------------|----|----|----|------------------|-----------------|
| 88.0852          | 1  | S  | 22 |                  |                 |
| 201.2429         | 2  | L  | 21 | 2238.5799        | 1119.7939       |
| 387.4528         | 3  | W  | 20 | 2125.4223        | 1063.2151       |
| 488.5567         | 4  | T  | 19 | 1939.2124        | 970.1102        |
| 601.7143         | 5  | L  | 18 | 1838.1085        | <b>919.5582</b> |
| 702.8182         | 6  | T  | 17 | 1724.9509        | 862.9794        |
| 789.8955         | 7  | S  | 16 | 1623.8470        | 812.4275        |
| 846.9468         | 8  | G  | 15 | 1536.7697        | 768.8888        |
| 948.0507         | 9  | T  | 14 | 1479.7184        | 740.3632        |
| 1035.1280        | 10 | S  | 13 | 1378.6145        | 689.8112        |
| <b>1122.2053</b> | 11 | S  | 12 | 1291.5372        | 646.2726        |
| 1221.3363        | 12 | V  | 11 | 1204.4599        | 602.7339        |
| 1335.4390        | 13 | N  | 10 | <b>1105.3288</b> | 553.1684        |
| 1422.5163        | 14 | S  | 9  | <b>991.2262</b>  | 496.1171        |
| <b>1519.6315</b> | 15 | P  | 8  | 904.1489         | 452.5784        |
| 1620.7353        | 16 | T  | 7  | <b>807.0337</b>  | 404.0208        |
| <b>1748.9076</b> | 17 | K  | 6  | 705.9298         | 353.4689        |
| 1852.0505        | 18 | C  | 5  | 577.7576         | 289.3828        |
| <b>1965.2082</b> | 19 | I  | 4  | 474.6147         | 237.8113        |
| 2078.3658        | 20 | I  | 3  | 361.4570         | 181.2325        |
| 2206.5381        | 21 | K  | 2  | 248.2994         | 124.6537        |
|                  | 22 | T  | 1  | 120.1271         | 60.5675         |



# GRELVVPSLGRQ

**X-range:**  -   
**MassTol:**  **Y-zoom:**   
**MassType:**  
 AVG  MONO  
**Axis:**  
 1  2  
**Label:**  
 I  M  -  
**Ions:**  
a  +  2+  3+  
b  +  2+  3+  
c  +  2+  3+  
x  +  2+  3+  
y  +  2+  3+  
z  +  2+  3+  
hide H<sub>2</sub>O/NH<sub>3</sub>   
zoom

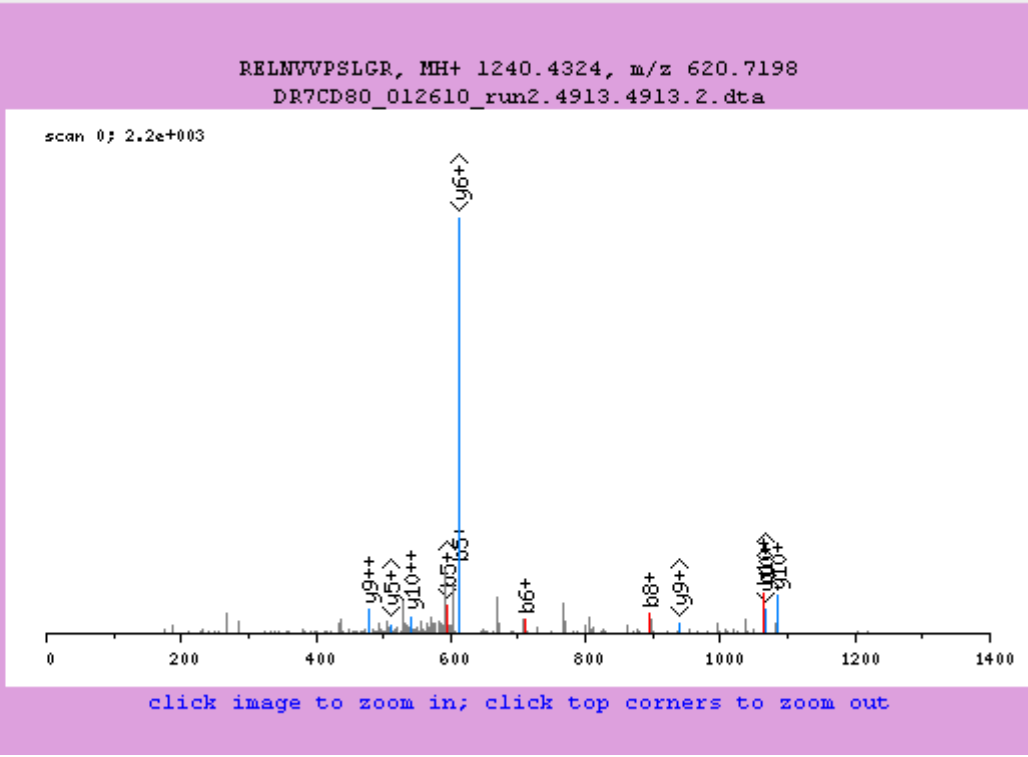

| b <sup>+</sup> | #  | AA | #  | y <sup>+</sup> | y <sup>2+</sup> |
|----------------|----|----|----|----------------|-----------------|
| 157.1936       | 1  | R  | 11 |                |                 |
| 286.3076       | 2  | E  | 10 | 1084.2467      | 542.6273        |
| 399.4652       | 3  | L  | 9  | 955.1327       | 478.0703        |
| 513.5679       | 4  | N  | 8  | 841.9751       | 421.4915        |
| 612.6989       | 5  | V  | 7  | 727.8725       | 364.4402        |
| 711.8300       | 6  | V  | 6  | 628.7414       | 314.8747        |
| 808.9452       | 7  | P  | 5  | 529.6103       | 265.3091        |
| 896.0225       | 8  | S  | 4  | 432.4952       | 216.7516        |
| 1009.1801      | 9  | L  | 3  | 345.4179       | 173.2129        |
| 1066.2314      | 10 | G  | 2  | 232.2602       | 116.6341        |
|                | 11 | R  | 1  | 175.2089       | 88.1084         |

# SESAAAPAFASSSSEVNPAPKFW

**X-range:**  
 -   
**MassTol:**  **Y-zoom:**   
**MassType:**  
 AVG  MONO  
**Axis:**  
 1  2  
**Label:**  
 I  M  -  
**Ions:**  
a  +  2+  3+  
b  +  2+  3+  
c  +  2+  3+  
x  +  2+  3+  
y  +  2+  3+  
z  +  2+  3+  
hide H<sub>2</sub>O/NH<sub>3</sub>   
zoom 112-122

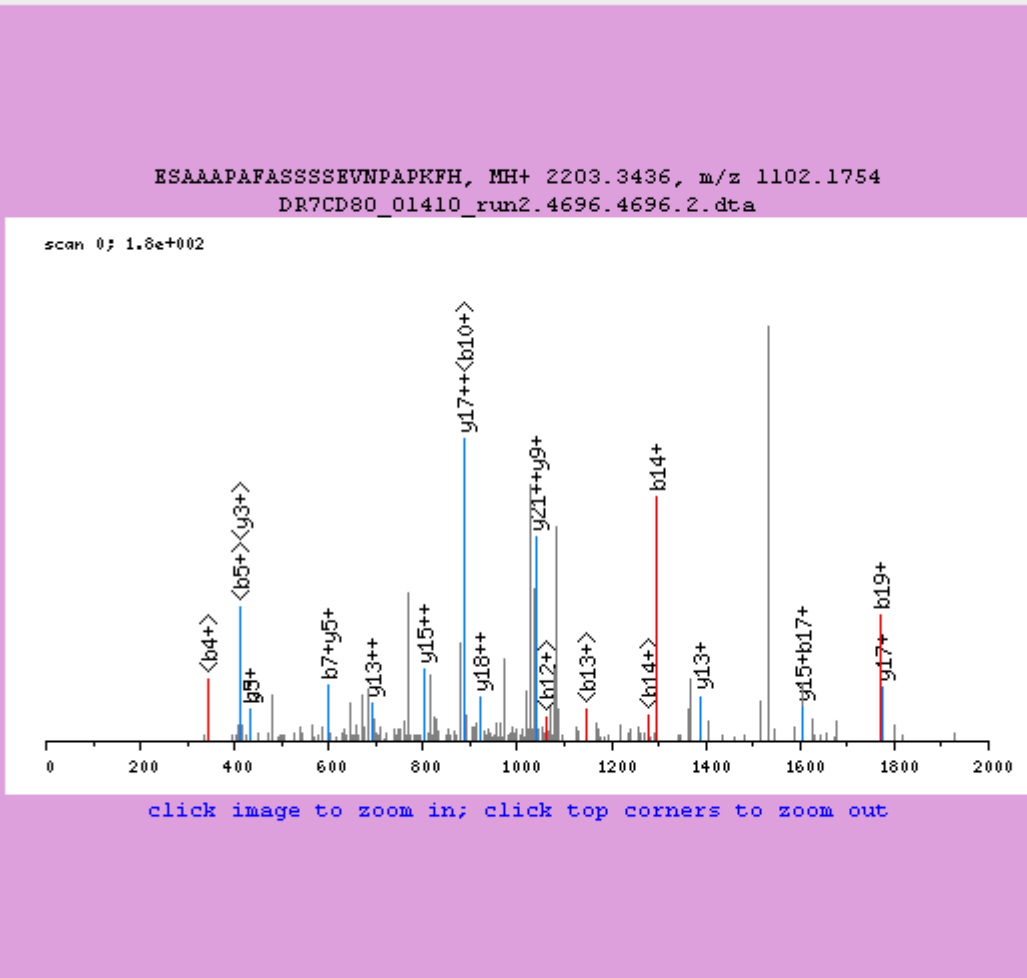

| b <sup>+</sup>   | #  | AA | #  | y <sup>+</sup>   | y <sup>2+</sup>  |
|------------------|----|----|----|------------------|------------------|
| 130.1219         | 1  | E  | 22 |                  |                  |
| 217.1992         | 2  | S  | 21 | 2074.2296        | <b>1037.6188</b> |
| 288.2771         | 3  | R  | 20 | 1987.1523        | 994.0801         |
| 359.3550         | 4  | R  | 19 | 1916.0744        | 958.5412         |
| <b>430.4329</b>  | 5  | R  | 18 | 1844.9965        | <b>923.0022</b>  |
| 527.5481         | 6  | P  | 17 | <b>1773.9186</b> | <b>887.4633</b>  |
| <b>598.6260</b>  | 7  | R  | 16 | 1676.8034        | 838.9057         |
| 745.7999         | 8  | F  | 15 | <b>1605.7255</b> | <b>803.3667</b>  |
| 816.8778         | 9  | R  | 14 | 1458.5517        | 729.7798         |
| 903.9551         | 10 | S  | 13 | <b>1387.4738</b> | <b>694.2409</b>  |
| 991.0324         | 11 | S  | 12 | 1300.3965        | 650.7022         |
| 1078.1097        | 12 | S  | 11 | 1213.3192        | 607.1636         |
| 1165.1870        | 13 | S  | 10 | 1126.2419        | 563.6249         |
| <b>1294.3009</b> | 14 | E  | 9  | <b>1039.1646</b> | 520.0863         |
| 1393.4320        | 15 | V  | 8  | 910.0506         | 455.5293         |
| 1507.5346        | 16 | N  | 7  | 810.9195         | 405.9637         |
| <b>1604.6498</b> | 17 | P  | 6  | 696.8169         | 348.9124         |
| 1675.7277        | 18 | R  | 5  | <b>599.7017</b>  | 300.3548         |
| <b>1772.8429</b> | 19 | P  | 4  | 528.6238         | 264.8159         |
| 1901.0152        | 20 | K  | 3  | <b>431.5086</b>  | 216.2583         |
| 2048.1890        | 21 | F  | 2  | 303.3364         | 152.1721         |
|                  | 22 | H  | 1  | 156.1625         | 78.5852          |

# SEPPKLIPLRT

X-range:  -

MassTol:  Y-zoom:

MassType:  
 AVG  MONO

Axis:  
 1  2

Label:  
 I  M  -

Ions:  
a  +  2+  3+  
b  +  2+  3+  
c  +  2+  3+  
x  +  2+  3+  
y  +  2+  3+  
z  +  2+  3+

hide H<sub>2</sub>O/NH<sub>3</sub>

zoom

EPPKLIPLR, MH+ 1191.4859, m/z 596.2466  
 DR7Ii\_011210\_run1.4075.4075.2.dta

scan 0; 1.0e+003

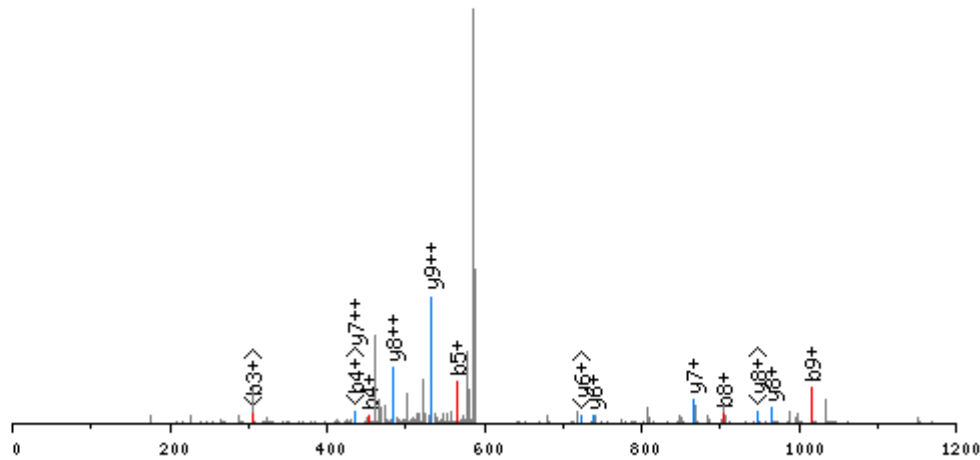

click image to zoom in; click top corners to zoom out

| b <sup>+</sup> | #  | AA | #  | y <sup>+</sup> | y <sup>2+</sup> |
|----------------|----|----|----|----------------|-----------------|
| 130.1219       | 1  | E  | 10 |                |                 |
| 227.2371       | 2  | P  | 9  | 1062.3719      | 531.6899        |
| 324.3523       | 3  | P  | 8  | 965.2567       | 483.1323        |
| 452.5246       | 4  | K  | 7  | 868.1416       | 434.5747        |
| 565.6822       | 5  | L  | 6  | 739.9693       | 370.4886        |
| 693.8545       | 6  | K  | 5  | 626.8116       | 313.9098        |
| 807.0121       | 7  | I  | 4  | 498.6394       | 249.8237        |
| 904.1273       | 8  | P  | 3  | 385.4817       | 193.2448        |
| 1017.2849      | 9  | L  | 2  | 288.3665       | 144.6872        |
|                | 10 | R  | 1  | 175.2089       | 88.1084         |

# FAGGGDLPPAPLSPAGPAAYSPPGP

**X-range:**  
 -

**MassTol:**  **Y-zoom:**

**MassType:**  
 AVG  MONO

**Axis:**  
 1  2

**Label:**  
 I  M  -

**Ions:**

a  +  2+  3+

b  +  2+  3+

c  +  2+  3+

x  +  2+  3+

y  +  2+  3+

z  +  2+  3+

hide H<sub>2</sub>O/NH<sub>3</sub>

zoom 112-122

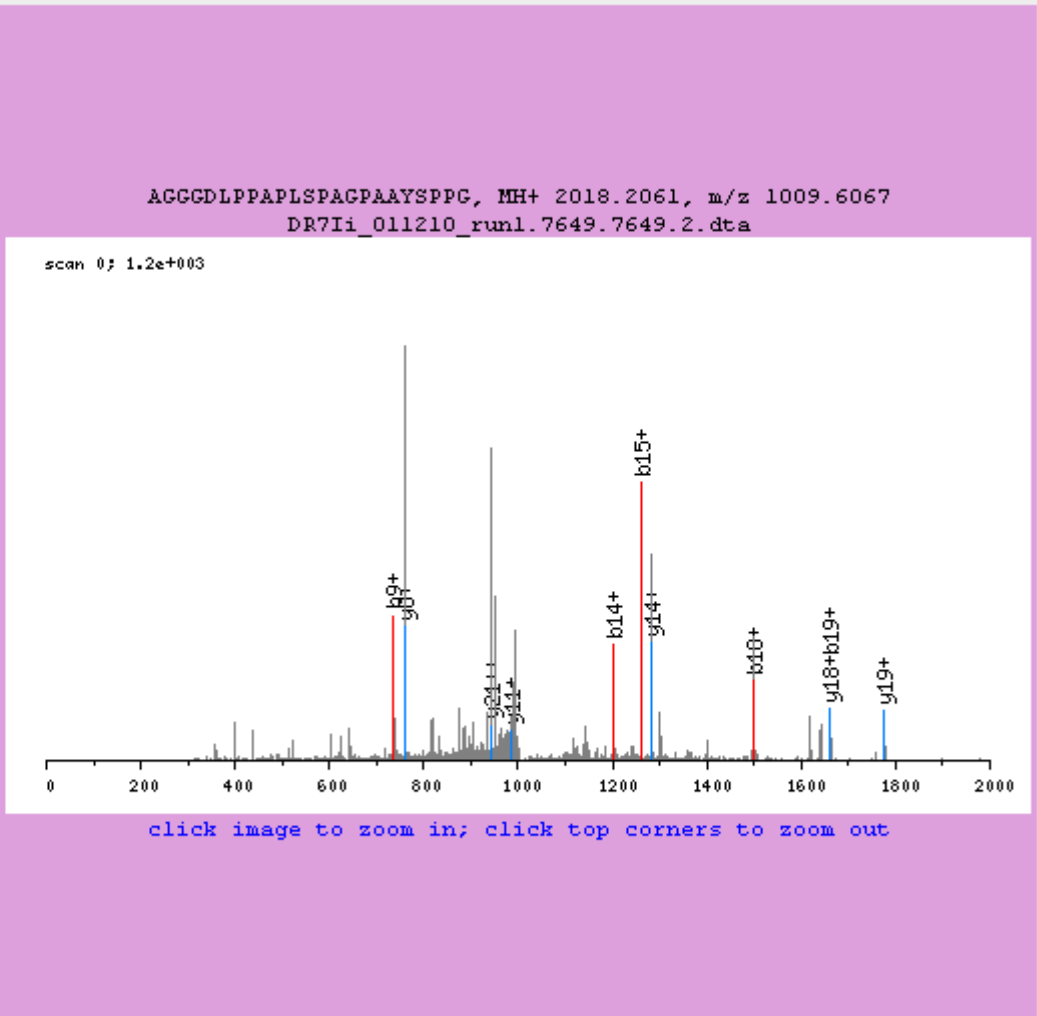

| b <sup>+</sup> | #  | AA | #  | y <sup>+</sup> | y <sup>2+</sup> |
|----------------|----|----|----|----------------|-----------------|
| 72.0858        | 1  | R  | 23 |                |                 |
| 129.1372       | 2  | G  | 22 | 1947.1282      | 974.0681        |
| 186.1885       | 3  | G  | 21 | 1890.0769      | 945.5424        |
| 243.2398       | 4  | G  | 20 | 1833.0256      | 917.0168        |
| 358.3272       | 5  | D  | 19 | 1775.9743      | 888.4911        |
| 471.4848       | 6  | L  | 18 | 1660.8869      | 830.9474        |
| 568.6000       | 7  | P  | 17 | 1547.7292      | 774.3686        |
| 665.7152       | 8  | P  | 16 | 1450.6140      | 725.8110        |
| 736.7931       | 9  | R  | 15 | 1353.4989      | 677.2534        |
| 833.9083       | 10 | P  | 14 | 1282.4210      | 641.7145        |
| 947.0659       | 11 | L  | 13 | 1185.3058      | 593.1569        |
| 1034.1432      | 12 | S  | 12 | 1072.1481      | 536.5780        |
| 1131.2584      | 13 | P  | 11 | 985.0708       | 493.0394        |
| 1202.3363      | 14 | R  | 10 | 887.9557       | 444.4818        |
| 1259.3876      | 15 | G  | 9  | 816.8778       | 408.9429        |
| 1356.5028      | 16 | P  | 8  | 759.8264       | 380.4172        |
| 1427.5807      | 17 | R  | 7  | 662.7113       | 331.8596        |
| 1498.6586      | 18 | R  | 6  | 591.6334       | 296.3207        |
| 1661.8319      | 19 | Y  | 5  | 520.5555       | 260.7817        |
| 1748.9092      | 20 | S  | 4  | 357.3822       | 179.1951        |
| 1846.0243      | 21 | P  | 3  | 270.3049       | 135.6564        |
| 1943.1395      | 22 | P  | 2  | 173.1897       | 87.0988         |
|                | 23 | G  | 1  | 76.0745        | 38.5412         |

# GVLAQIKSQKVQDILAFYL

X-range:  -

MassTol:  Y-zoom:

MassType:  AVG  MONO

Axis:  1  2

Label:  I  M  -

Ions:

a  +  2+  3+

b  +  2+  3+

c  +  2+  3+

x  +  2+  3+

Y  +  2+  3+

z  +  2+  3+

hide H<sub>2</sub>O/NH<sub>3</sub>

zoom 112-122

VLAQIKSQKVQDILAFY, MH+ 1965.3157, m/z 983.1615  
DR7Ii\_012110\_run1.6637.6637.2.dta

scan 0; 5.7e+002

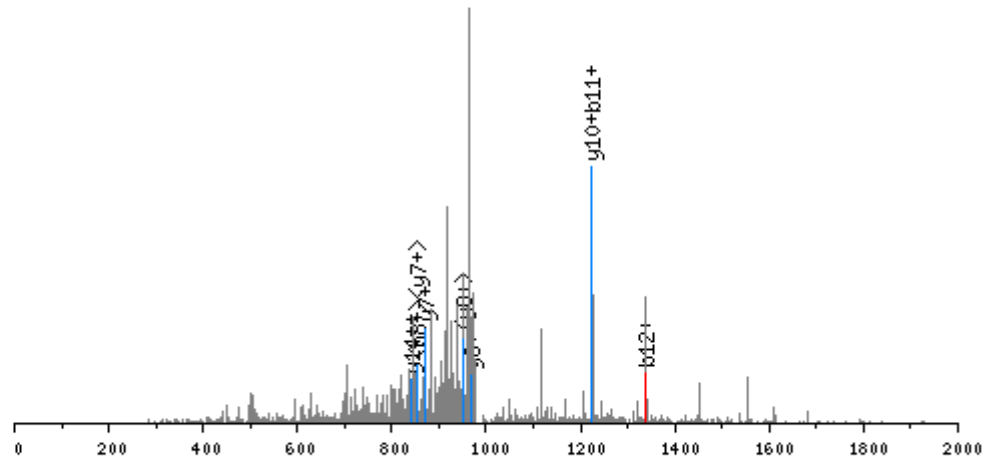

click image to zoom in; click top corners to zoom out

| b <sup>+</sup> | #  | AA | #  | y <sup>+</sup> | y <sup>2+</sup> |
|----------------|----|----|----|----------------|-----------------|
| 100.1390       | 1  | V  | 17 |                |                 |
| 213.2966       | 2  | L  | 16 | 1866.1847      | 933.5963        |
| 284.3745       | 3  | R  | 15 | 1753.0270      | 877.0175        |
| 412.5038       | 4  | Q  | 14 | 1681.9491      | 841.4785        |
| 525.6614       | 5  | I  | 13 | 1553.8199      | 777.4139        |
| 653.8337       | 6  | K  | 12 | 1440.6623      | 720.8351        |
| 740.9110       | 7  | S  | 11 | 1312.4900      | 656.7490        |
| 869.0402       | 8  | Q  | 10 | 1225.4127      | 613.2103        |
| 997.2125       | 9  | K  | 9  | 1097.2835      | 549.1457        |
| 1096.3435      | 10 | V  | 8  | 969.1112       | 485.0596        |
| 1224.4728      | 11 | Q  | 7  | 869.9801       | 435.4940        |
| 1339.5602      | 12 | D  | 6  | 741.8509       | 371.4294        |
| 1452.7178      | 13 | I  | 5  | 626.7635       | 313.8857        |
| 1565.8754      | 14 | L  | 4  | 513.6059       | 257.3069        |
| 1636.9533      | 15 | R  | 3  | 400.4482       | 200.7281        |
| 1784.1272      | 16 | F  | 2  | 329.3703       | 165.1891        |
|                | 17 | Y  | 1  | 182.1965       | 91.6022         |

# SYELPDGQVITIGNERFR

**X-range:**  
 -

**MassTol:**  **Y-zoom:**

**MassType:**  
 AVG  MONO

**Axis:**  
 1  2

**Label:**  
 I  M  -

**Ions:**

a  +  2+  3+

b  +  2+  3+

c  +  2+  3+

x  +  2+  3+

y  +  2+  3+

z  +  2+  3+

hide H<sub>2</sub>O/NH<sub>3</sub>

zoom 112-122

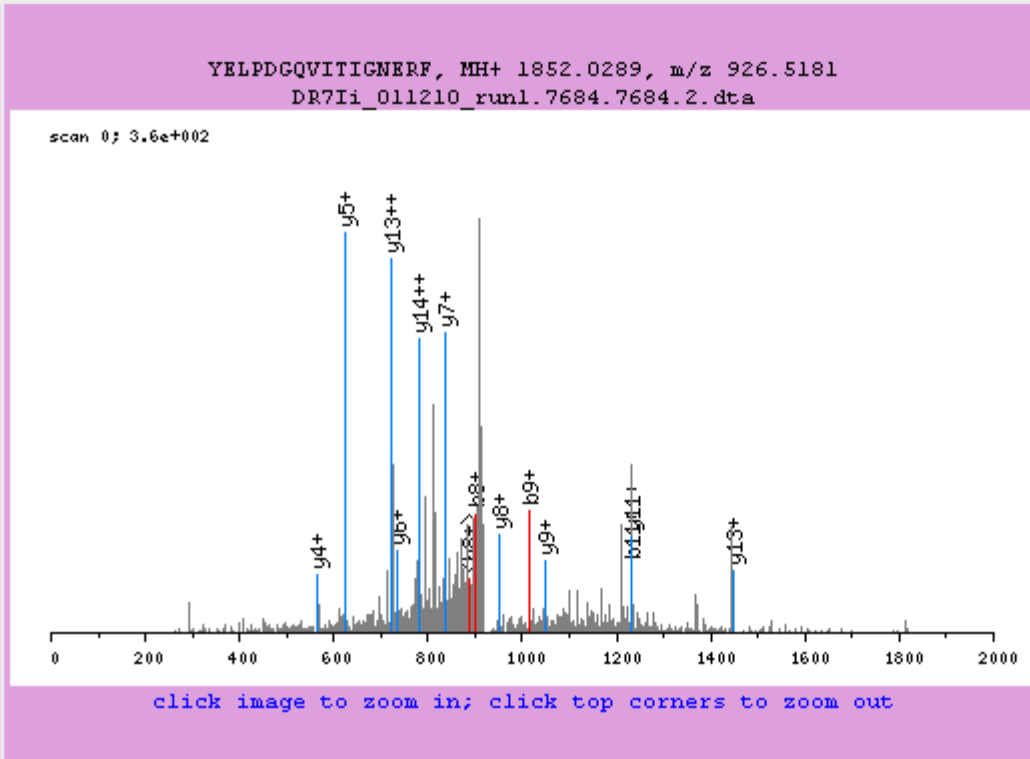

| b <sup>+</sup>   | #  | AA | #  | y <sup>+</sup>   | y <sup>2+</sup> |
|------------------|----|----|----|------------------|-----------------|
| 164.1812         | 1  | Y  | 16 |                  |                 |
| 293.2952         | 2  | E  | 15 | 1688.8557        | 844.9318        |
| 406.4528         | 3  | L  | 14 | 1559.7417        | <b>780.3748</b> |
| 503.5680         | 4  | P  | 13 | <b>1446.5840</b> | <b>723.7960</b> |
| 618.6554         | 5  | D  | 12 | 1349.4689        | 675.2384        |
| 675.7067         | 6  | G  | 11 | <b>1234.3815</b> | 617.6947        |
| 803.8359         | 7  | Q  | 10 | 1177.3301        | 589.1690        |
| <b>902.9670</b>  | 8  | V  | 9  | <b>1049.2009</b> | 525.1044        |
| <b>1016.1246</b> | 9  | I  | 8  | <b>950.0699</b>  | 475.5389        |
| 1117.2285        | 10 | T  | 7  | <b>836.9122</b>  | 418.9601        |
| <b>1230.3862</b> | 11 | I  | 6  | <b>735.8083</b>  | 368.4081        |
| 1287.4375        | 12 | G  | 5  | <b>622.6507</b>  | 311.8293        |
| 1401.5401        | 13 | N  | 4  | <b>565.5994</b>  | 283.3037        |
| 1530.6541        | 14 | E  | 3  | 451.4967         | 226.2523        |
| 1686.8398        | 15 | R  | 2  | 322.3828         | 161.6953        |
|                  | 16 | F  | 1  | 166.1971         | 83.6025         |

# LALYEDGALDSLQLLSSSSSLPGLG

X-range:

0 - 0

MassTol: Y-zoom:

0.950 1.00

MassType:

AVG  MONO

Axis:

1  2

Label:

I  M  -

Ions:

a  +  2+  3+

b  +  2+  3+

c  +  2+  3+

x  +  2+  3+

y  +  2+  3+

z  +  2+  3+

hide H<sub>2</sub>O/NH<sub>3</sub>

zoom 112-122

GO

ALYEDGALDSLQLLSSSSSLPGL, MH+ 2250.4781, m/z 1125.7427  
DR7Ii\_011210\_run2.6919.6919.2.dta

scan 0; 1.7e+003

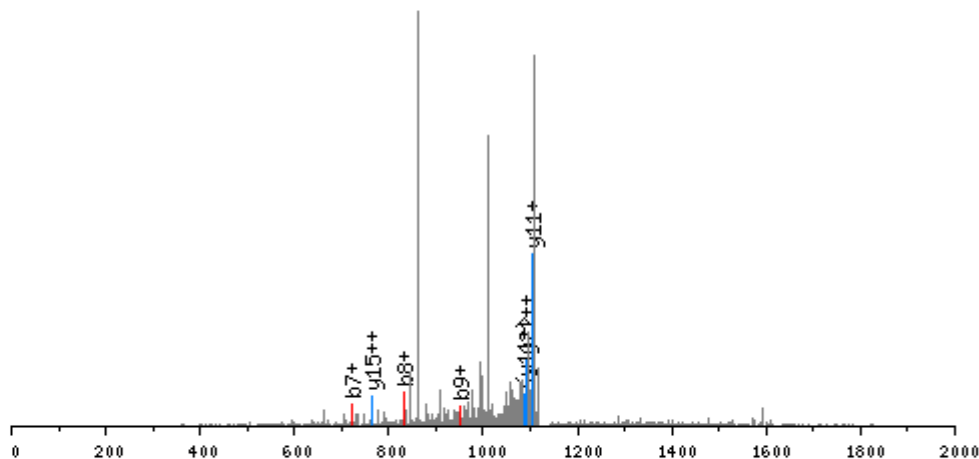

click image to zoom in; click top corners to zoom out

| b <sup>+</sup> | #  | AA | #  | y <sup>+</sup> | y <sup>2+</sup> |
|----------------|----|----|----|----------------|-----------------|
| 72.0858        | 1  | R  | 22 |                |                 |
| 185.2435       | 2  | L  | 21 | 2179.4002      | 1090.2041       |
| 348.4167       | 3  | Y  | 20 | 2066.2425      | 1033.6252       |
| 477.5307       | 4  | E  | 19 | 1903.0693      | 952.0386        |
| 592.6181       | 5  | D  | 18 | 1773.9553      | 887.4816        |
| 649.6694       | 6  | G  | 17 | 1658.8679      | 829.9379        |
| 720.7473       | 7  | R  | 16 | 1601.8166      | 801.4123        |
| 833.9050       | 8  | L  | 15 | 1530.7387      | 765.8733        |
| 948.9924       | 9  | D  | 14 | 1417.5810      | 709.2945        |
| 1036.0697      | 10 | S  | 13 | 1302.4936      | 651.7508        |
| 1149.2273      | 11 | L  | 12 | 1215.4163      | 608.2121        |
| 1277.3565      | 12 | Q  | 11 | 1102.2587      | 551.6333        |
| 1390.5142      | 13 | L  | 10 | 974.1295       | 487.5687        |
| 1503.6718      | 14 | L  | 9  | 860.9718       | 430.9899        |
| 1590.7491      | 15 | S  | 8  | 747.8142       | 374.4111        |
| 1677.8264      | 16 | S  | 7  | 660.7369       | 330.8724        |
| 1764.9037      | 17 | S  | 6  | 573.6596       | 287.3338        |
| 1851.9810      | 18 | S  | 5  | 486.5823       | 243.7951        |
| 1965.1387      | 19 | L  | 4  | 399.5050       | 200.2565        |
| 2062.2538      | 20 | P  | 3  | 286.3474       | 143.6776        |
| 2119.3052      | 21 | G  | 2  | 189.2322       | 95.1201         |
|                | 22 | L  | 1  | 132.1809       | 66.5944         |

# QVFKSFYNETYFERHA

**X-range:**  
 -   
**MassTol:**  **Y-zoom:**   
**MassType:**  
 AVG  MONO  
**Axis:**  
 1  2  
**Label:**  
 I  M  -  
**Ions:**  
a  +  2+  3+  
b  +  2+  3+  
c  +  2+  3+  
x  +  2+  3+  
y  +  2+  3+  
z  +  2+  3+  
hide H<sub>2</sub>O/NH<sub>3</sub>   
zoom 112-122

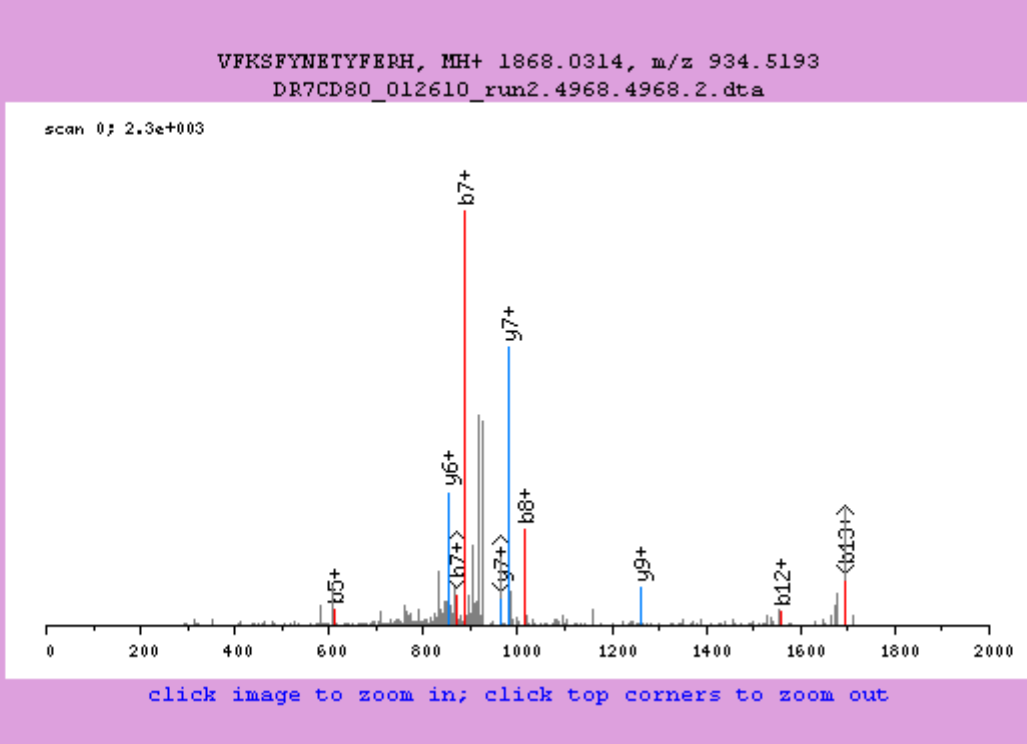

| b <sup>+</sup> | #  | AA | #  | y <sup>+</sup> | y <sup>2+</sup> |
|----------------|----|----|----|----------------|-----------------|
| 100.1390       | 1  | V  | 14 |                |                 |
| 247.3129       | 2  | F  | 13 | 1768.9003      | 884.9541        |
| 375.4851       | 3  | K  | 12 | 1621.7265      | 811.3672        |
| 462.5624       | 4  | S  | 11 | 1493.5542      | 747.2811        |
| 609.7363       | 5  | F  | 10 | 1406.4769      | 703.7424        |
| 772.9096       | 6  | Y  | 9  | 1259.3030      | 630.1555        |
| 887.0122       | 7  | N  | 8  | 1096.1298      | 548.5689        |
| 1016.1262      | 8  | E  | 7  | 982.0271       | 491.5175        |
| 1117.2301      | 9  | T  | 6  | 852.9132       | 426.9606        |
| 1280.4033      | 10 | Y  | 5  | 751.8093       | 376.4086        |
| 1427.5772      | 11 | F  | 4  | 588.6360       | 294.8220        |
| 1556.6912      | 12 | E  | 3  | 441.4622       | 221.2351        |
| 1712.8768      | 13 | R  | 2  | 312.3482       | 156.6781        |
|                | 14 | H  | 1  | 156.1625       | 78.5852         |



# FYLMKGDYY

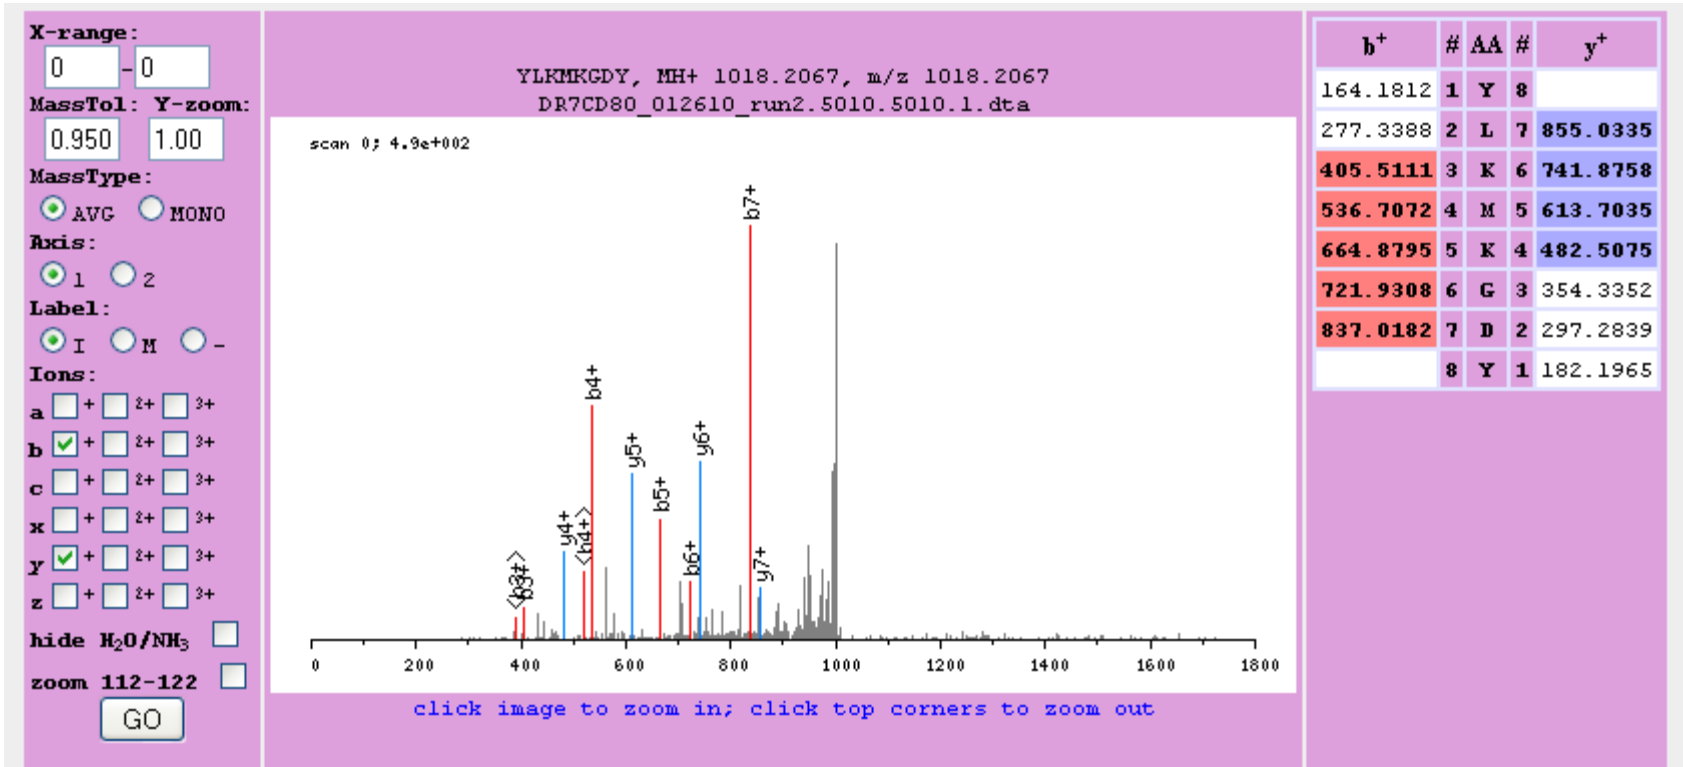

# FTCRSMNEAIPSGKETSIELDVHH

X-range:

0 - 0

MassTol: Y-zoom:

0.950 1.00

MassType:

AVG  MONO

Axis:

1  2

Label:

I  M  -

Ions:

a  +  2+  3+

b  +  2+  3+

c  +  2+  3+

x  +  2+  3+

y  +  2+  3+

z  +  2+  3+

hide H<sub>2</sub>O/NH<sub>3</sub>

zoom 112-122

GO

TCRSMNEAIPSGKETSIELDVH, MH+ 2418.6794, m/z 1209.8434  
DR7Ii\_012110\_run2.6608.6608.2.dta

scan 0: 7.3e+002

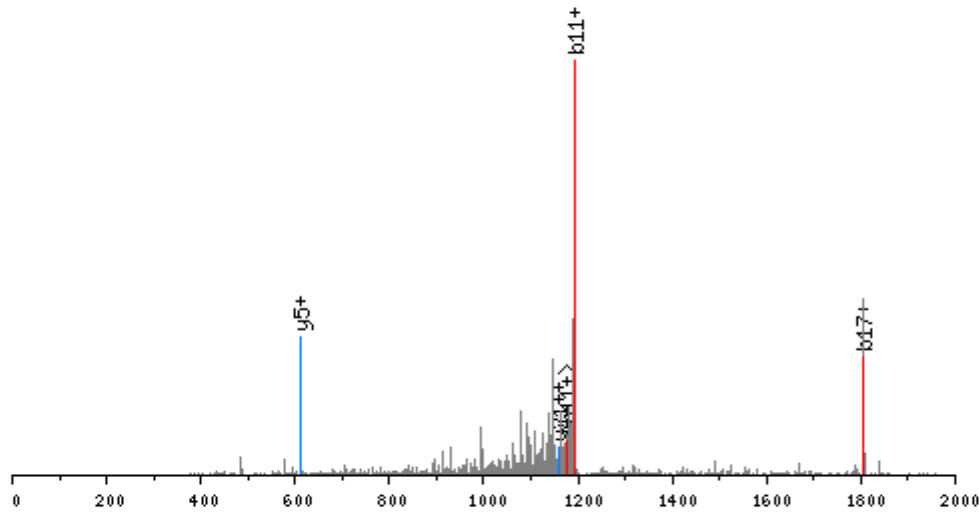

click image to zoom in; click top corners to zoom out

| b <sup>+</sup> | #  | AA | #  | y <sup>+</sup> | y <sup>2+</sup> |
|----------------|----|----|----|----------------|-----------------|
| 102.1118       | 1  | T  | 22 |                |                 |
| 205.2547       | 2  | C  | 21 | 2317.5756      | 1159.2917       |
| 361.4404       | 3  | R  | 20 | 2214.4327      | 1107.7203       |
| 448.5177       | 4  | S  | 19 | 2058.2470      | 1029.6275       |
| 579.7138       | 5  | M  | 18 | 1971.1697      | 986.0888        |
| 693.8164       | 6  | N  | 17 | 1839.9736      | 920.4908        |
| 822.9304       | 7  | E  | 16 | 1725.8710      | 863.4395        |
| 894.0083       | 8  | A  | 15 | 1596.7570      | 798.8825        |
| 1007.1659      | 9  | I  | 14 | 1525.6791      | 763.3435        |
| 1104.2811      | 10 | P  | 13 | 1412.5215      | 706.7647        |
| 1191.3584      | 11 | S  | 12 | 1315.4063      | 658.2071        |
| 1248.4097      | 12 | G  | 11 | 1228.3290      | 614.6685        |
| 1376.5820      | 13 | K  | 10 | 1171.2777      | 586.1428        |
| 1505.6960      | 14 | E  | 9  | 1043.1054      | 522.0567        |
| 1606.7999      | 15 | T  | 8  | 913.9914       | 457.4997        |
| 1693.8772      | 16 | S  | 7  | 812.8875       | 406.9477        |
| 1807.0348      | 17 | I  | 6  | 725.8102       | 363.4091        |
| 1936.1488      | 18 | E  | 5  | 612.6526       | 306.8303        |
| 2049.3064      | 19 | L  | 4  | 483.5386       | 242.2733        |
| 2164.3938      | 20 | D  | 3  | 370.3810       | 185.6944        |
| 2263.5249      | 21 | V  | 2  | 255.2936       | 128.1507        |
|                | 22 | H  | 1  | 156.1625       | 78.5852         |

# AACHRLKLWPELQDNGGDYVSA

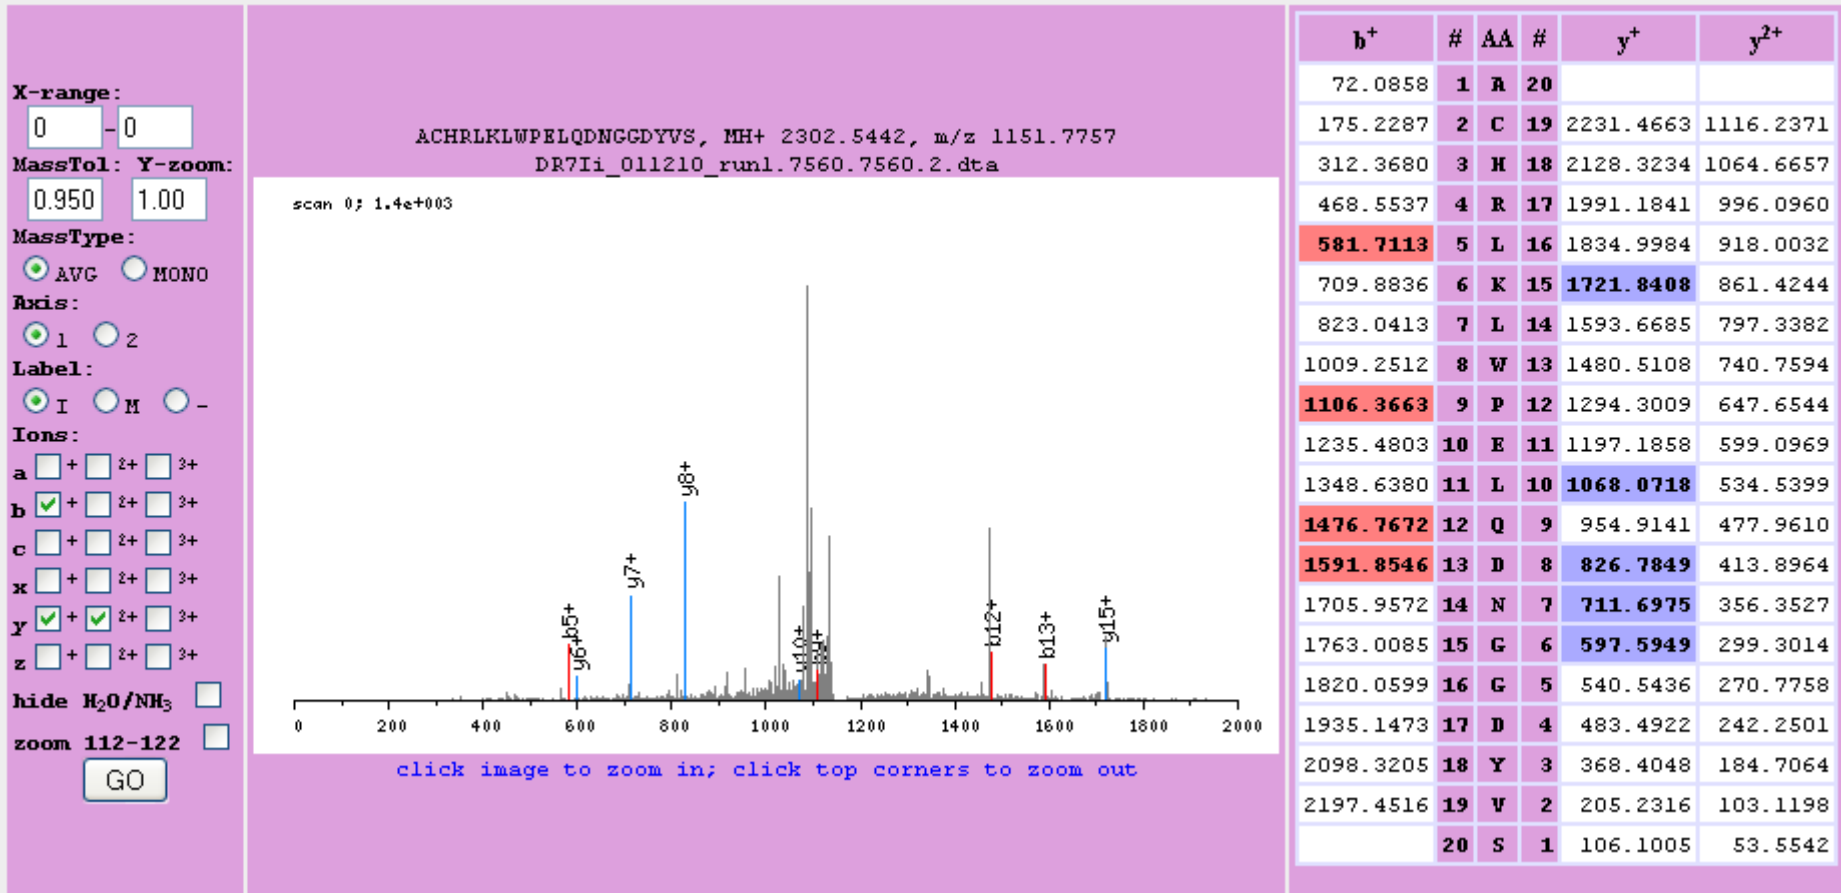

# KSIRDTPAKNAQKS

**X-range:**  
 -

**MassTol:** **Y-zoom:**

**MassType:**  
 AVG  MONO

**Axis:**  
 1  2

**Label:**  
 I  M  -

**Ions:**

a  +  2+  3+

b  +  2+  3+

c  +  2+  3+

x  +  2+  3+

y  +  2+  3+

z  +  2+  3+

hide H<sub>2</sub>O/NH<sub>3</sub>

zoom 112-122

SIRDTPAKNAQK, MH+ 1329.4825, m/z 665.2449  
 DR7CD80\_012610\_run1.4231.4231.2.dta

scan 0; 8.8e+002

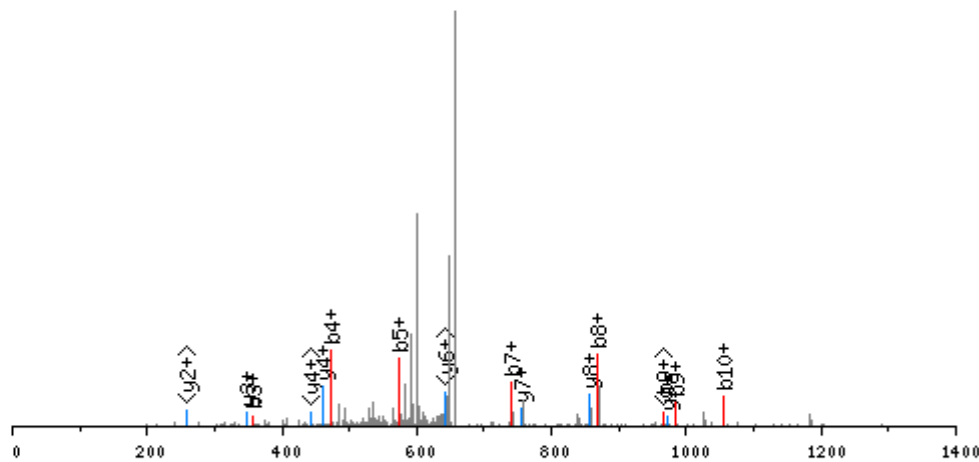

click image to zoom in; click top corners to zoom out

| b <sup>+</sup> | #  | AA | #  | y <sup>+</sup> | y <sup>2+</sup> |
|----------------|----|----|----|----------------|-----------------|
| 88.0852        | 1  | S  | 12 |                |                 |
| 201.2429       | 2  | I  | 11 | 1242.4052      | 621.7066        |
| 357.4286       | 3  | R  | 10 | 1129.2476      | 565.1278        |
| 472.5160       | 4  | D  | 9  | 973.0619       | 487.0349        |
| 573.6198       | 5  | T  | 8  | 857.9745       | 429.4912        |
| 670.7350       | 6  | P  | 7  | 756.8706       | 378.9393        |
| 741.8129       | 7  | R  | 6  | 659.7554       | 330.3817        |
| 869.9852       | 8  | K  | 5  | 588.6775       | 294.8427        |
| 984.0878       | 9  | N  | 4  | 460.5053       | 230.7566        |
| 1055.1657      | 10 | R  | 3  | 346.4026       | 173.7053        |
| 1183.2950      | 11 | Q  | 2  | 275.3247       | 138.1663        |
|                | 12 | K  | 1  | 147.1955       | 74.1017         |

# LHPSSLPLTPPSPSLSPSPLHGIFQV

**X-range:**  
 -   
**MassTol:**  **Y-zoom:**   
**MassType:**  
 AVG  MONO  
**Basis:**  
 1  2  
**Label:**  
 I  M  -  
**Ions:**  
a  +  2+  3+  
b  +  2+  3+  
c  +  2+  3+  
x  +  2+  3+  
y  +  2+  3+  
z  +  2+  3+  
hide H<sub>2</sub>O/NH<sub>3</sub>   
zoom 112-122

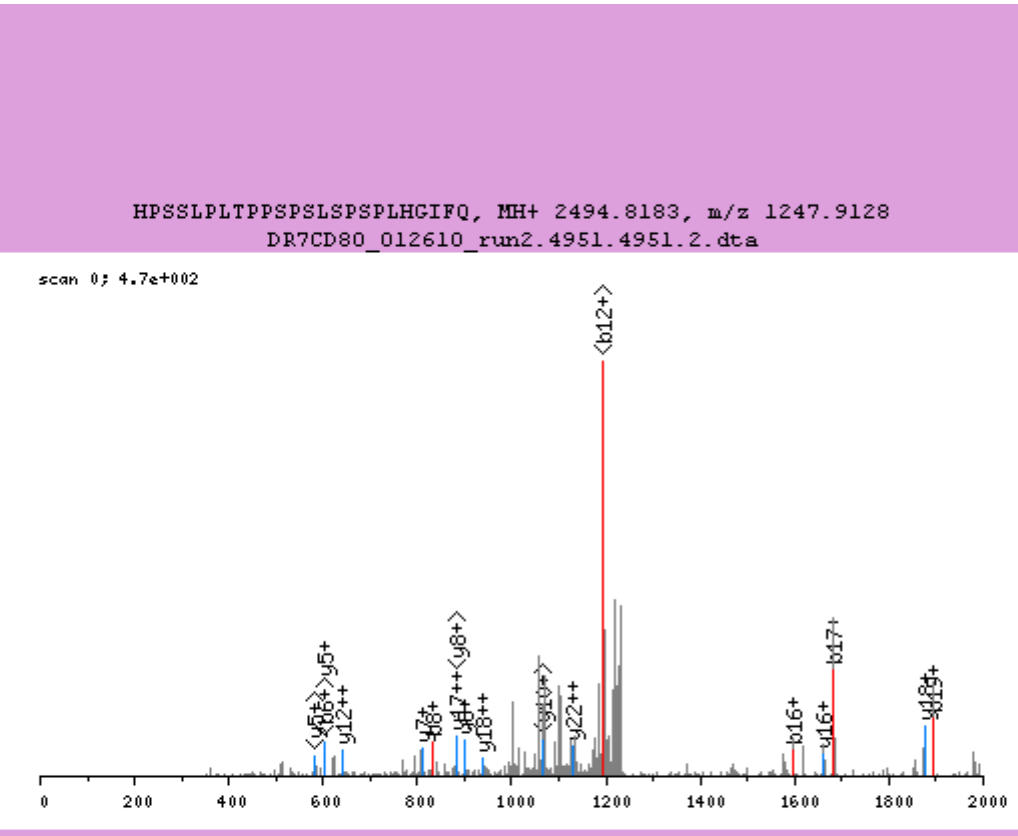

| b <sup>+</sup>   | #  | AA | #  | y <sup>+</sup>   | y <sup>2+</sup>  |
|------------------|----|----|----|------------------|------------------|
| 138.1472         | 1  | H  | 24 |                  |                  |
| 235.2624         | 2  | P  | 23 | 2357.6790        | 1179.3435        |
| 322.3397         | 3  | S  | 22 | 2260.5639        | <b>1130.7859</b> |
| 409.4170         | 4  | S  | 21 | 2173.4866        | 1087.2472        |
| 522.5746         | 5  | L  | 20 | 2086.4093        | 1043.7086        |
| 619.6898         | 6  | P  | 19 | 1973.2516        | 987.1298         |
| 732.8475         | 7  | L  | 18 | <b>1876.1364</b> | <b>938.5722</b>  |
| <b>833.9513</b>  | 8  | T  | 17 | 1762.9788        | <b>881.9934</b>  |
| 931.0665         | 9  | P  | 16 | <b>1661.8749</b> | 831.4414         |
| 1028.1817        | 10 | P  | 15 | 1564.7597        | 782.8838         |
| 1115.2590        | 11 | S  | 14 | 1467.6446        | 734.3262         |
| 1212.3742        | 12 | P  | 13 | 1380.5673        | 690.7876         |
| 1299.4515        | 13 | S  | 12 | 1283.4521        | <b>642.2300</b>  |
| 1412.6091        | 14 | L  | 11 | 1196.3748        | 598.6914         |
| 1499.6864        | 15 | S  | 10 | 1083.2171        | 542.1125         |
| <b>1596.8016</b> | 16 | P  | 9  | 996.1398         | 498.5739         |
| <b>1683.8789</b> | 17 | S  | 8  | <b>899.0247</b>  | 450.0163         |
| 1780.9941        | 18 | P  | 7  | <b>811.9474</b>  | 406.4776         |
| <b>1894.1517</b> | 19 | L  | 6  | 714.8322         | 357.9201         |
| 2031.2910        | 20 | H  | 5  | <b>601.6745</b>  | 301.3412         |
| 2088.3423        | 21 | G  | 4  | 464.5353         | 232.7716         |
| 2201.5000        | 22 | I  | 3  | 407.4839         | 204.2459         |
| 2348.6738        | 23 | F  | 2  | 294.3263         | 147.6671         |
|                  | 24 | Q  | 1  | 147.1524         | 74.0802          |
