# Supplementary material
Source: PubMed Central journal article supplement (PMC3494186)
Supplement: supp_M112.019232_Supplemental_figure_2.pdf [file supp_M112.019232_Supplemental_figure_2.pdf]

**Supplemental Figure 2.** Spectra of proteins from HLA-DR7 and HLA-DR7/Ii<sup>+</sup> cells identified by a single peptide (continued from supplemental figure 4).

# KSLAQAEAEKQKEEAERE

X-range:  -

MassTol:  Y-zoom:

MassType:  
 AVG  MONO

Axis:  
 1  2

Label:  
 I  M  -

Ions:  
a  +  2+  3+  
b  +  2+  3+  
c  +  2+  3+  
x  +  2+  3+  
y  +  2+  3+  
z  +  2+  3+

hide H<sub>2</sub>O/NH<sub>3</sub>

zoom

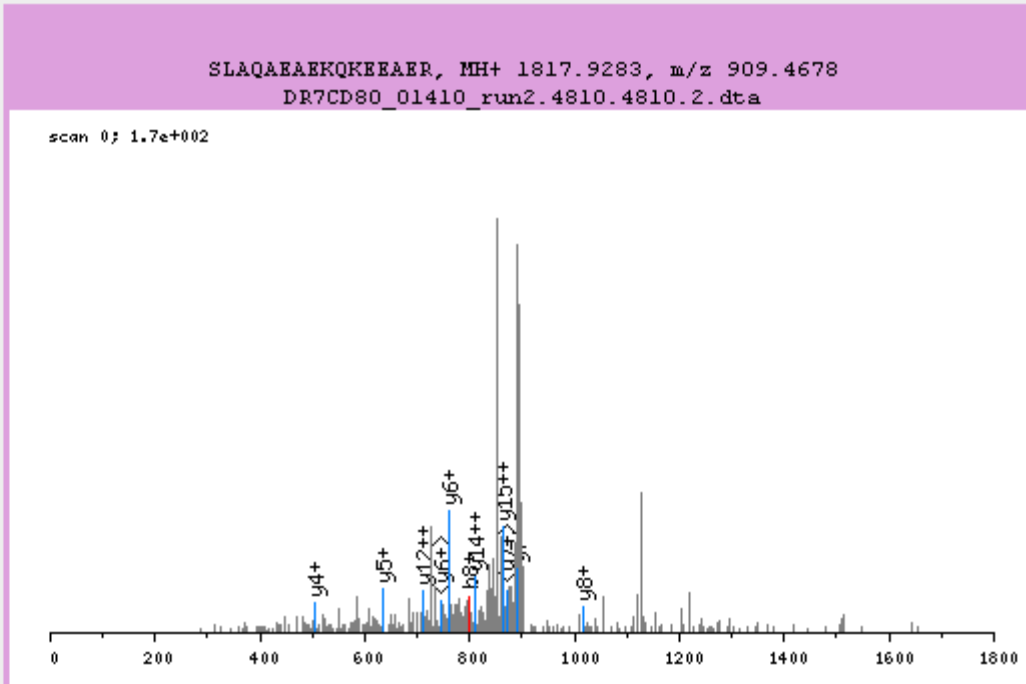

| b <sup>+</sup> | #  | AA | #  | y <sup>+</sup> | y <sup>2+</sup> |
|----------------|----|----|----|----------------|-----------------|
| 88.0852        | 1  | S  | 16 |                |                 |
| 201.2429       | 2  | L  | 15 | 1730.8510      | 865.9295        |
| 272.3208       | 3  | R  | 14 | 1617.6934      | 809.3507        |
| 400.4500       | 4  | Q  | 13 | 1546.6155      | 773.8117        |
| 471.5279       | 5  | R  | 12 | 1418.4863      | 709.7471        |
| 600.6419       | 6  | E  | 11 | 1347.4084      | 674.2082        |
| 671.7198       | 7  | R  | 10 | 1218.2944      | 609.6512        |
| 800.8338       | 8  | E  | 9  | 1147.2165      | 574.1122        |
| 929.0060       | 9  | K  | 8  | 1018.1025      | 509.5552        |
| 1057.1353      | 10 | Q  | 7  | 889.9302       | 445.4691        |
| 1185.3075      | 11 | K  | 6  | 761.8010       | 381.4045        |
| 1314.4215      | 12 | E  | 5  | 633.6287       | 317.3183        |
| 1443.5355      | 13 | E  | 4  | 504.5148       | 252.7614        |
| 1514.6134      | 14 | R  | 3  | 375.4008       | 188.2044        |
| 1643.7274      | 15 | E  | 2  | 304.3229       | 152.6654        |
|                | 16 | R  | 1  | 175.2089       | 88.1084         |

# FSNHKELKTDSSPNQARA

**X-range:**  
 -

**MassTol:**  **Y-zoom:**

**MassType:**  
 AVG  MONO

**Axis:**  
 1  2

**Label:**  
 I  M  -

**Ions:**

a  +  2+  3+

b  +  2+  3+

c  +  2+  3+

x  +  2+  3+

y  +  2+  3+

z  +  2+  3+

hide H<sub>2</sub>O/NH<sub>3</sub>

zoom 112-122

SNHKELKTDSSPNQAR, MH+ 1812.9151, m/z 906.9612  
 DR7Ii\_012110\_run1.3906.3906.2.dta

scan 0; 4.9e+002

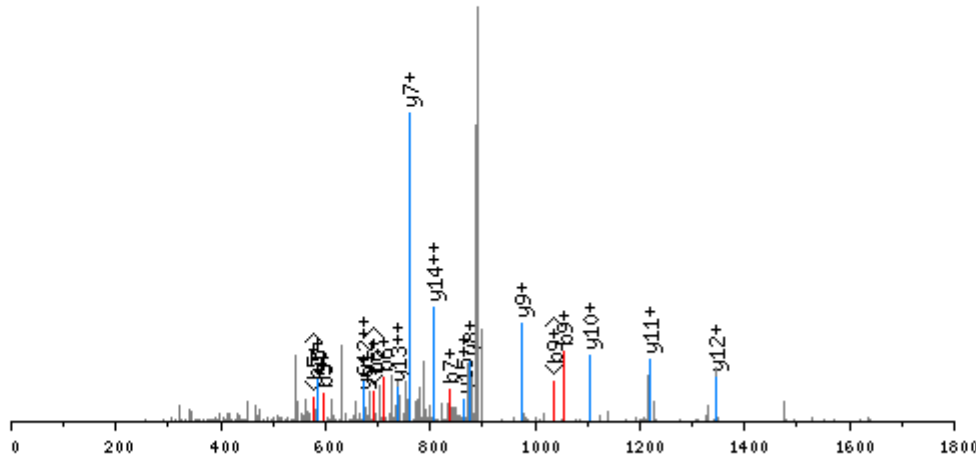

click image to zoom in; click top corners to zoom out

| b <sup>+</sup> | #  | AA | #  | y <sup>+</sup> | y <sup>2+</sup> |
|----------------|----|----|----|----------------|-----------------|
| 88.0852        | 1  | S  | 16 |                |                 |
| 202.1879       | 2  | N  | 15 | 1725.8378      | 863.4229        |
| 339.3272       | 3  | H  | 14 | 1611.7352      | 806.3716        |
| 467.4994       | 4  | K  | 13 | 1474.5959      | 737.8019        |
| 596.6134       | 5  | E  | 12 | 1346.4236      | 673.7158        |
| 709.7711       | 6  | L  | 11 | 1217.3096      | 609.1588        |
| 837.9433       | 7  | K  | 10 | 1104.1520      | 552.5800        |
| 939.0472       | 8  | T  | 9  | 975.9797       | 488.4938        |
| 1054.1346      | 9  | D  | 8  | 874.8758       | 437.9419        |
| 1141.2119      | 10 | S  | 7  | 759.7884       | 380.3982        |
| 1228.2892      | 11 | S  | 6  | 672.7111       | 336.8595        |
| 1325.4044      | 12 | P  | 5  | 585.6338       | 293.3209        |
| 1439.5070      | 13 | N  | 4  | 488.5187       | 244.7633        |
| 1567.6363      | 14 | Q  | 3  | 374.4160       | 187.7120        |
| 1638.7142      | 15 | R  | 2  | 246.2868       | 123.6474        |
|                | 16 | R  | 1  | 175.2089       | 88.1084         |

# WFCPECAAPGVVLAADAGPVS

X-range:

0 - 0

MassTol: Y-zoom:

0.950 1.00

MassType:

AVG  MONO

Axis:

1  2

Label:

I  M  -

Ions:

a  +  2+  3+

b  +  2+  3+

c  +  2+  3+

x  +  2+  3+

y  +  2+  3+

z  +  2+  3+

hide H<sub>2</sub>O/NH<sub>3</sub>

zoom 112-122

GO

FCPECAAPGVVLAADAGPV, MH+ 1788.0728, m/z 894.5400  
DR7Ii\_011210\_run2.5692.5692.2.dta

scan 0; 1.5e+003

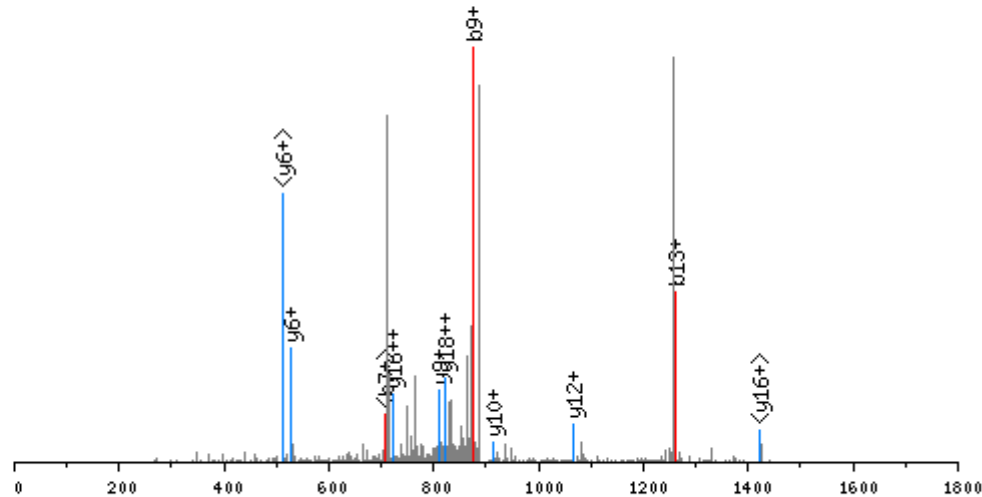

click image to zoom in; click top corners to zoom out

| b <sup>+</sup> | #  | AA | #  | y <sup>+</sup> | y <sup>2+</sup> |
|----------------|----|----|----|----------------|-----------------|
| 148.1818       | 1  | F  | 19 |                |                 |
| 251.3247       | 2  | C  | 18 | 1640.8989      | 820.9534        |
| 348.4399       | 3  | P  | 17 | 1537.7560      | 769.3820        |
| 477.5539       | 4  | E  | 16 | 1440.6408      | 720.8244        |
| 580.6968       | 5  | C  | 15 | 1311.5268      | 656.2674        |
| 651.7747       | 6  | R  | 14 | 1208.3839      | 604.6959        |
| 722.8526       | 7  | R  | 13 | 1137.3060      | 569.1570        |
| 819.9677       | 8  | P  | 12 | 1066.2281      | 533.6180        |
| 877.0191       | 9  | G  | 11 | 969.1130       | 485.0604        |
| 976.1501       | 10 | V  | 10 | 912.0616       | 456.5348        |
| 1075.2812      | 11 | V  | 9  | 812.9306       | 406.9693        |
| 1188.4388      | 12 | L  | 8  | 713.7995       | 357.4037        |
| 1259.5167      | 13 | R  | 7  | 600.6419       | 300.8249        |
| 1330.5946      | 14 | R  | 6  | 529.5640       | 265.2860        |
| 1445.6820      | 15 | D  | 5  | 458.4861       | 229.7470        |
| 1516.7599      | 16 | R  | 4  | 343.3987       | 172.2033        |
| 1573.8112      | 17 | G  | 3  | 272.3208       | 136.6644        |
| 1670.9264      | 18 | P  | 2  | 215.2695       | 108.1387        |
|                | 19 | V  | 1  | 118.1543       | 59.5811         |

# NDALINQKYDEVMATYILLGR

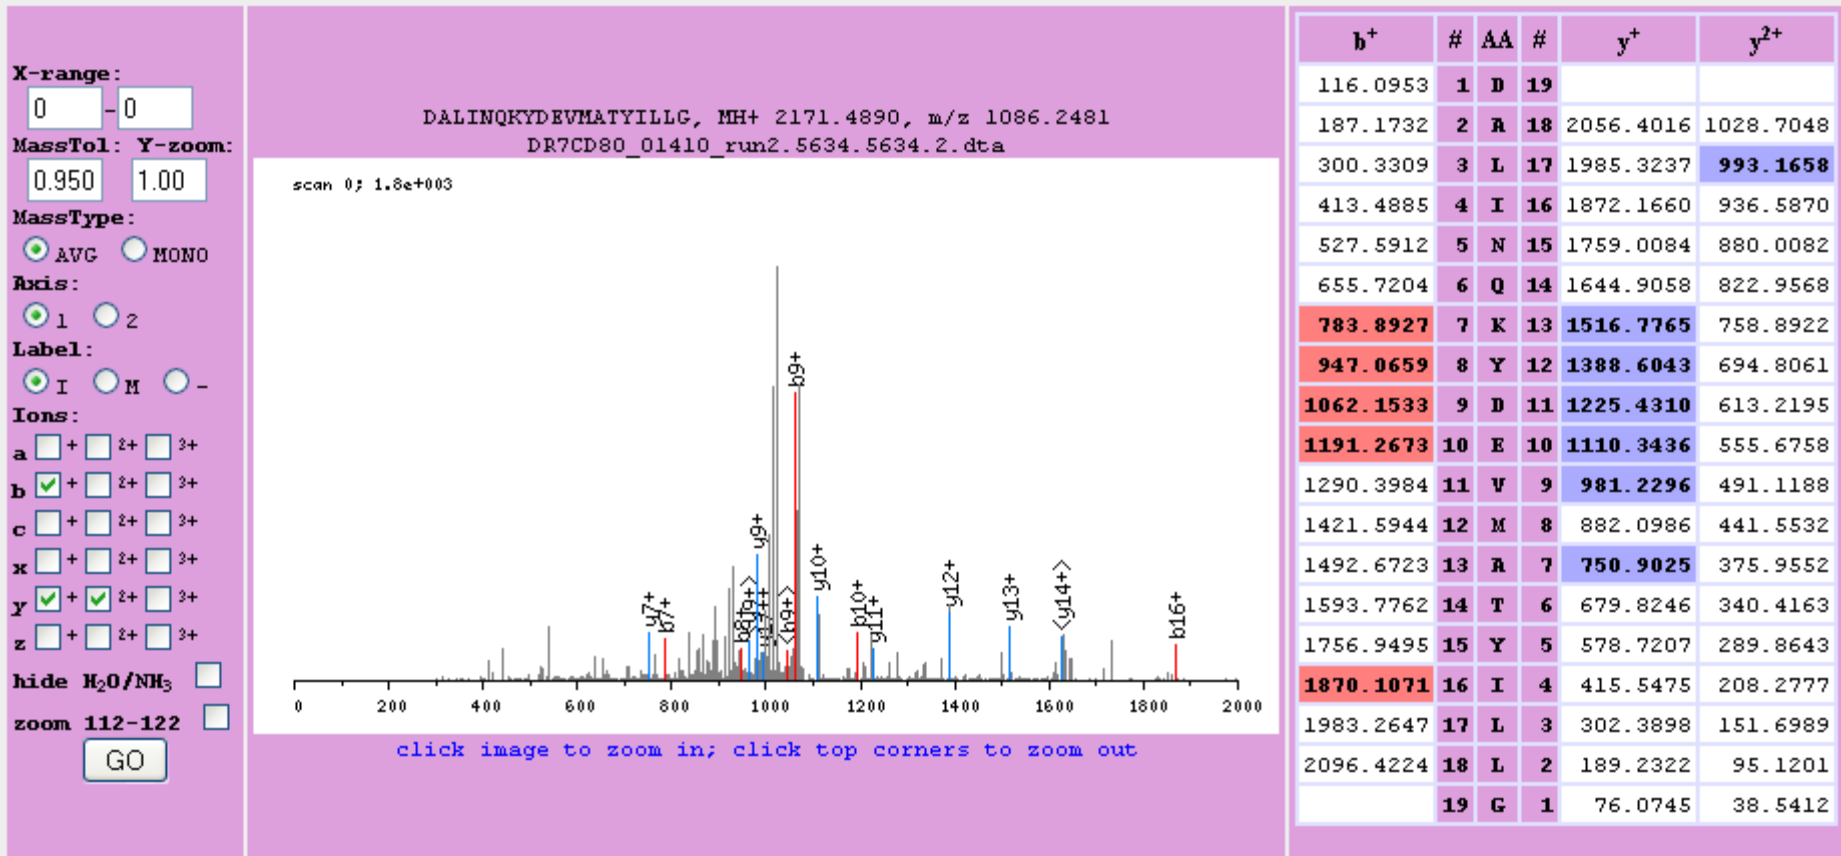

# KDLHPLFDETFEFLVPAEPCRKAGACLLLV

X-range:

0 - 0

MassTol: Y-zoom:

0.950 1.00

MassType:

AVG  MONO

Axis:

1  2

Label:

I  M  -

Ions:

a  +  2+  3+

b  +  2+  3+

c  +  2+  3+

x  +  2+  3+

y  +  2+  3+

z  +  2+  3+

hide H<sub>2</sub>O/NH<sub>3</sub>

zoom 112-122

GO

DLHPLFDETFEFLVPAEPCRKAGACLLLV, MH+ 3247.7598, m/z 1083.2581  
DR7Ii\_011210\_run1.7384.7384.3.dta

scan 0; 1.5e+003

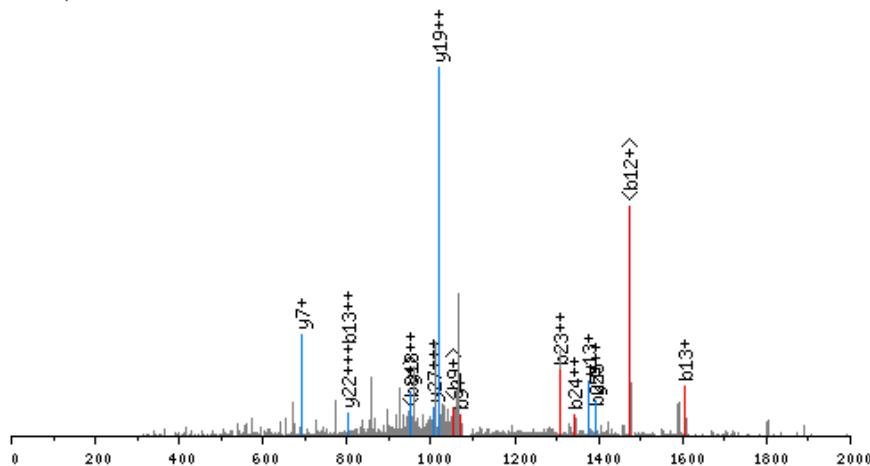

click image to zoom in; click top corners to zoom out

| b <sup>+</sup> | b <sup>2+</sup> | #  | AA | #  | y <sup>+</sup> | y <sup>2+</sup> | y <sup>3+</sup> |
|----------------|-----------------|----|----|----|----------------|-----------------|-----------------|
| 116.0953       | 58.5516         | 1  | D  | 29 |                |                 |                 |
| 229.2530       | 115.1305        | 2  | L  | 28 | 3132.6724      | 1566.8402       | 1044.8961       |
| 366.3923       | 183.7001        | 3  | H  | 27 | 3019.5148      | 1510.2614       | 1007.1769       |
| 463.5074       | 232.2577        | 4  | P  | 26 | 2882.3755      | 1441.6917       | 961.4638        |
| 576.6651       | 288.8365        | 5  | L  | 25 | 2785.2603      | 1393.1341       | 929.0921        |
| 723.8389       | 362.4234        | 6  | F  | 24 | 2672.1027      | 1336.5553       | 891.3728        |
| 838.9263       | 419.9671        | 7  | D  | 23 | 2524.9288      | 1262.9684       | 842.3149        |
| 968.0403       | 484.5241        | 8  | E  | 22 | 2409.8414      | 1205.4247       | 803.9524        |
| 1069.1442      | 535.0761        | 9  | T  | 21 | 2280.7274      | 1140.8677       | 760.9144        |
| 1216.3181      | 608.6630        | 10 | F  | 20 | 2179.6235      | 1090.3157       | 727.2131        |
| 1345.4320      | 673.2200        | 11 | E  | 19 | 2032.4497      | 1016.7288       | 678.1552        |
| 1492.6059      | 746.8069        | 12 | F  | 18 | 1903.3357      | 952.1718        | 635.1172        |
| 1605.7635      | 803.3857        | 13 | L  | 17 | 1756.1618      | 878.5849        | 586.0592        |
| 1704.8946      | 852.9513        | 14 | V  | 16 | 1643.0042      | 822.0061        | 548.3400        |
| 1802.0098      | 901.5089        | 15 | P  | 15 | 1543.8731      | 772.4405        | 515.2963        |
| 1873.0877      | 937.0478        | 16 | R  | 14 | 1446.7580      | 723.8830        | 482.9246        |
| 2002.2017      | 1001.6048       | 17 | E  | 13 | 1375.6801      | 688.3440        | 459.2320        |
| 2099.3168      | 1050.1624       | 18 | P  | 12 | 1246.5661      | 623.7870        | 416.1940        |
| 2202.4597      | 1101.7338       | 19 | C  | 11 | 1149.4509      | 575.2294        | 383.8223        |
| 2358.6454      | 1179.8267       | 20 | R  | 10 | 1046.3080      | 523.6580        | 349.4413        |
| 2486.8177      | 1243.9128       | 21 | K  | 9  | 890.1223       | 445.5651        | 297.3794        |
| 2557.8956      | 1279.4518       | 22 | R  | 8  | 761.9500       | 381.4790        | 254.6553        |
| 2614.9469      | 1307.9774       | 23 | G  | 7  | 690.8721       | 345.9400        | 230.9627        |
| 2686.0248      | 1343.5164       | 24 | R  | 6  | 633.8208       | 317.4144        | 211.9456        |
| 2789.1677      | 1395.0878       | 25 | C  | 5  | 562.7429       | 281.8754        | 188.2529        |
| 2902.3254      | 1451.6666       | 26 | L  | 4  | 459.6000       | 230.3040        | 153.8720        |
| 3015.4830      | 1508.2455       | 27 | L  | 3  | 346.4424       | 173.7252        | 116.1528        |
| 3128.6406      | 1564.8243       | 28 | L  | 2  | 233.2847       | 117.1463        | 78.4335         |
|                |                 | 29 | T  | 1  | 120.1271       | 60.5675         | 40.7143         |

# KSLTPAVPVESKPKPSGKS

**X-range:**  
 -   
**MassTol:** **Y-zoom:**  
   
**MassType:**  
 AVG  MONO  
**Axis:**  
 1  2  
**Label:**  
 I  M  -  
**Ions:**  
a  +  2+  3+  
b  +  2+  3+  
c  +  2+  3+  
x  +  2+  3+  
y  +  2+  3+  
z  +  2+  3+  
hide H<sub>2</sub>O/NH<sub>3</sub>   
zoom 112-122

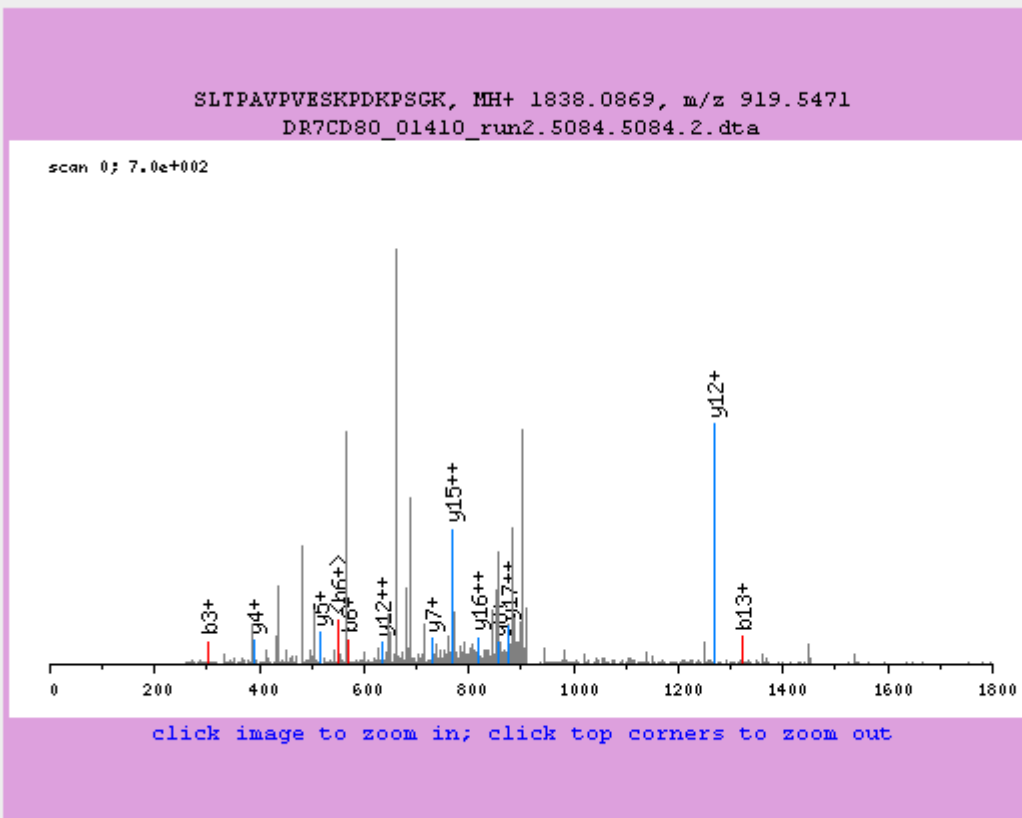

| b <sup>+</sup> | #  | AA | #  | y <sup>+</sup> | y <sup>2+</sup> |
|----------------|----|----|----|----------------|-----------------|
| 88.0852        | 1  | S  | 18 |                |                 |
| 201.2429       | 2  | L  | 17 | 1751.0096      | 876.0088        |
| 302.3468       | 3  | T  | 16 | 1637.8520      | 819.4300        |
| 399.4619       | 4  | P  | 15 | 1536.7481      | 768.8780        |
| 470.5398       | 5  | A  | 14 | 1439.6329      | 720.3204        |
| 569.6709       | 6  | V  | 13 | 1368.5550      | 684.7815        |
| 666.7861       | 7  | P  | 12 | 1269.4240      | 635.2160        |
| 765.9171       | 8  | V  | 11 | 1172.3088      | 586.6584        |
| 895.0311       | 9  | E  | 10 | 1073.1777      | 537.0928        |
| 982.1084       | 10 | S  | 9  | 944.0637       | 472.5358        |
| 1110.2807      | 11 | K  | 8  | 856.9864       | 428.9972        |
| 1207.3959      | 12 | P  | 7  | 728.8142       | 364.9111        |
| 1322.4833      | 13 | D  | 6  | 631.6990       | 316.3535        |
| 1450.6556      | 14 | K  | 5  | 516.6116       | 258.8098        |
| 1547.7707      | 15 | P  | 4  | 388.4393       | 194.7236        |
| 1634.8480      | 16 | S  | 3  | 291.3241       | 146.1660        |
| 1691.8994      | 17 | G  | 2  | 204.2468       | 102.6274        |
|                | 18 | K  | 1  | 147.1955       | 74.1017         |

# LIAKSVRNYTQEASLGALQNL

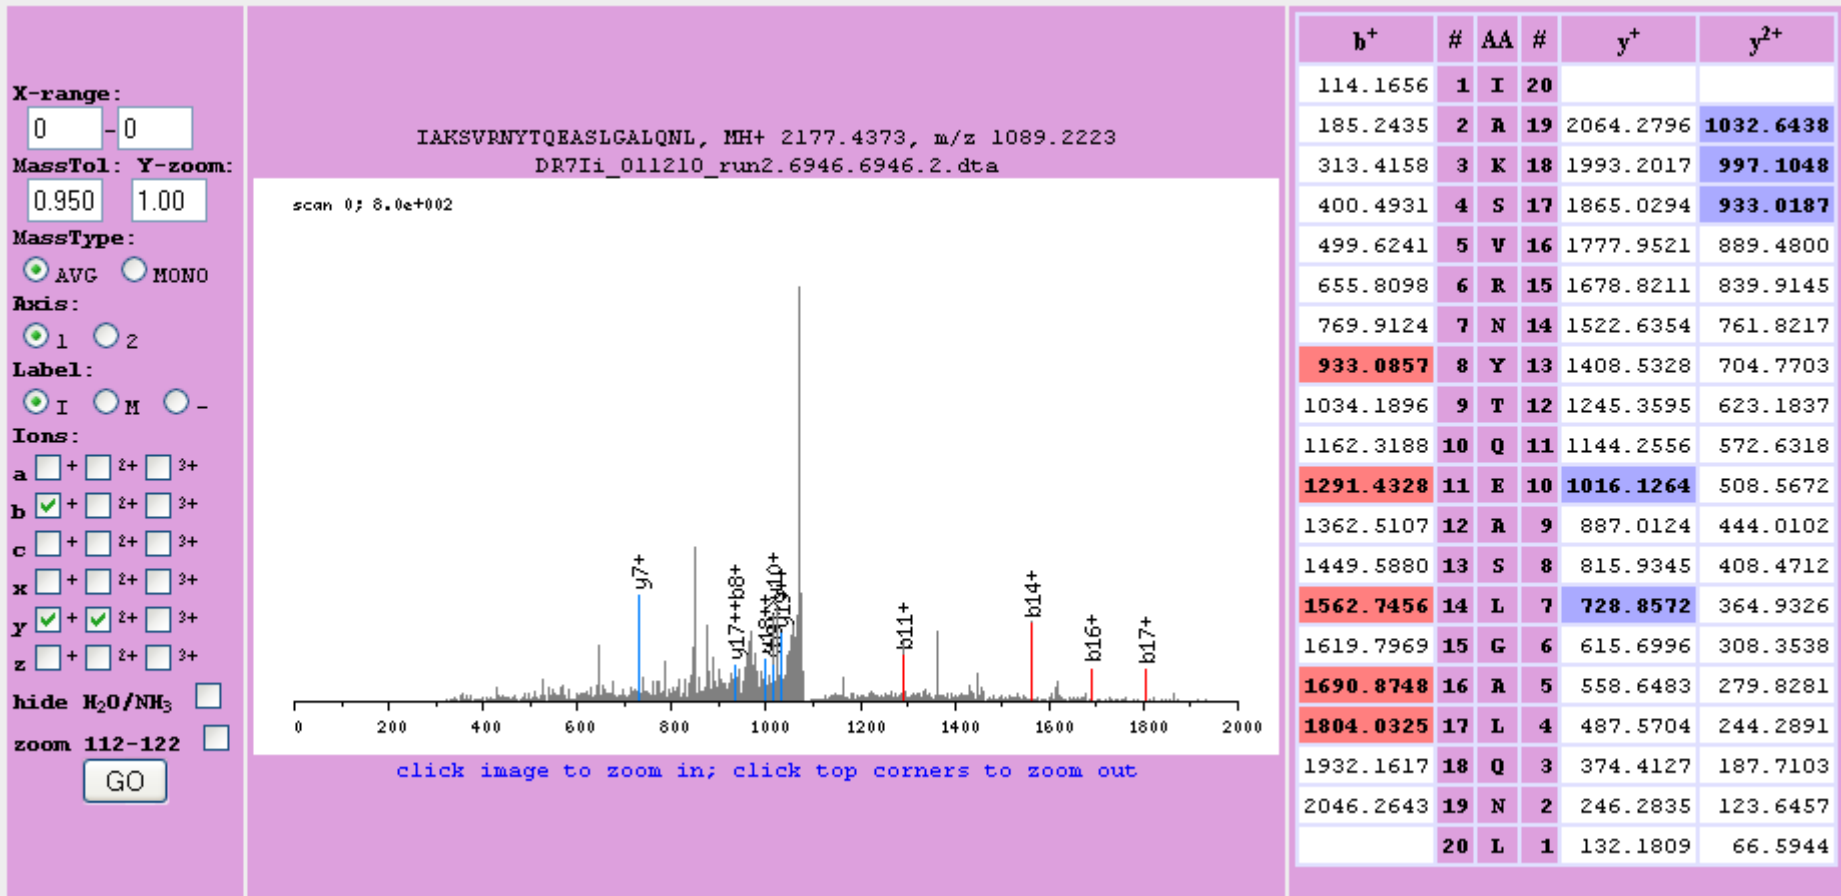



# FFVGGNWKMNNGRKQSLGELI

X-range:

0 - 0

MassTol: Y-zoom:

0.950 1.00

MassType:

AVG  MONO

Axis:

1  2

Label:

I  M  -

Ions:

a  +  2+  3+

b  +  2+  3+

c  +  2+  3+

x  +  2+  3+

y  +  2+  3+

z  +  2+  3+

hide H<sub>2</sub>O/NH<sub>3</sub>

zoom 112-122

GO

FFVGGNWKMNNGRKQSLGEL, MH+ 2022.3107, m/z 1011.6590  
DR7Ii\_011210\_run2.6508.6508.2.dta

scan 0; 1.1e+003

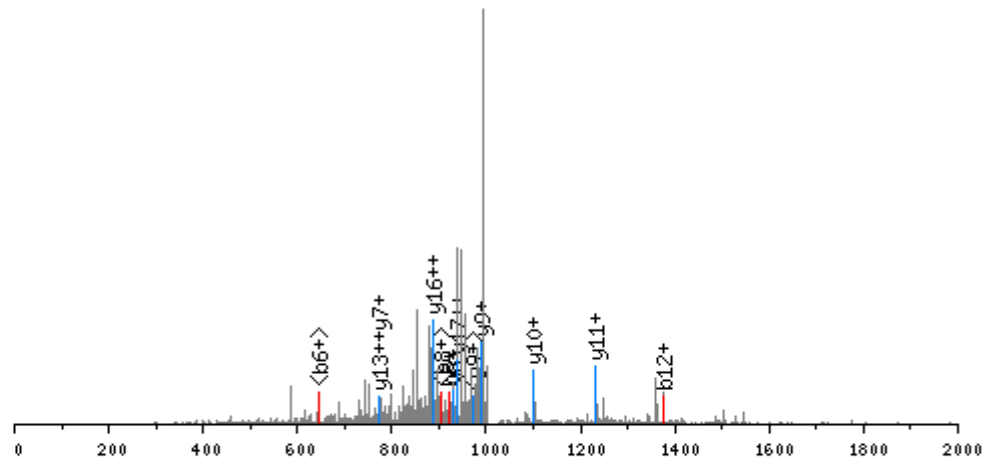

click image to zoom in; click top corners to zoom out

| b <sup>+</sup> | #  | AA | #  | y <sup>+</sup> | y <sup>2+</sup> |
|----------------|----|----|----|----------------|-----------------|
| 148.1818       | 1  | F  | 18 |                |                 |
| 247.3129       | 2  | V  | 17 | 1875.1368      | 938.0724        |
| 304.3642       | 3  | G  | 16 | 1776.0058      | 888.5069        |
| 361.4155       | 4  | G  | 15 | 1718.9544      | 859.9812        |
| 475.5181       | 5  | N  | 14 | 1661.9031      | 831.4555        |
| 661.7280       | 6  | W  | 13 | 1547.8005      | 774.4042        |
| 789.9003       | 7  | K  | 12 | 1361.5906      | 681.2993        |
| 921.0964       | 8  | M  | 11 | 1233.4183      | 617.2131        |
| 1035.1990      | 9  | N  | 10 | 1102.2222      | 551.6151        |
| 1092.2503      | 10 | G  | 9  | 988.1196       | 494.5638        |
| 1248.4360      | 11 | R  | 8  | 931.0683       | 466.0381        |
| 1376.6083      | 12 | K  | 7  | 774.8826       | 387.9453        |
| 1504.7375      | 13 | Q  | 6  | 646.7103       | 323.8591        |
| 1591.8148      | 14 | S  | 5  | 518.5811       | 259.7945        |
| 1704.9725      | 15 | L  | 4  | 431.5038       | 216.2559        |
| 1762.0238      | 16 | G  | 3  | 318.3462       | 159.6771        |
| 1891.1378      | 17 | E  | 2  | 261.2948       | 131.1514        |
|                | 18 | L  | 1  | 132.1809       | 66.5944         |

# NLAHCLQIVCDWTDYDER

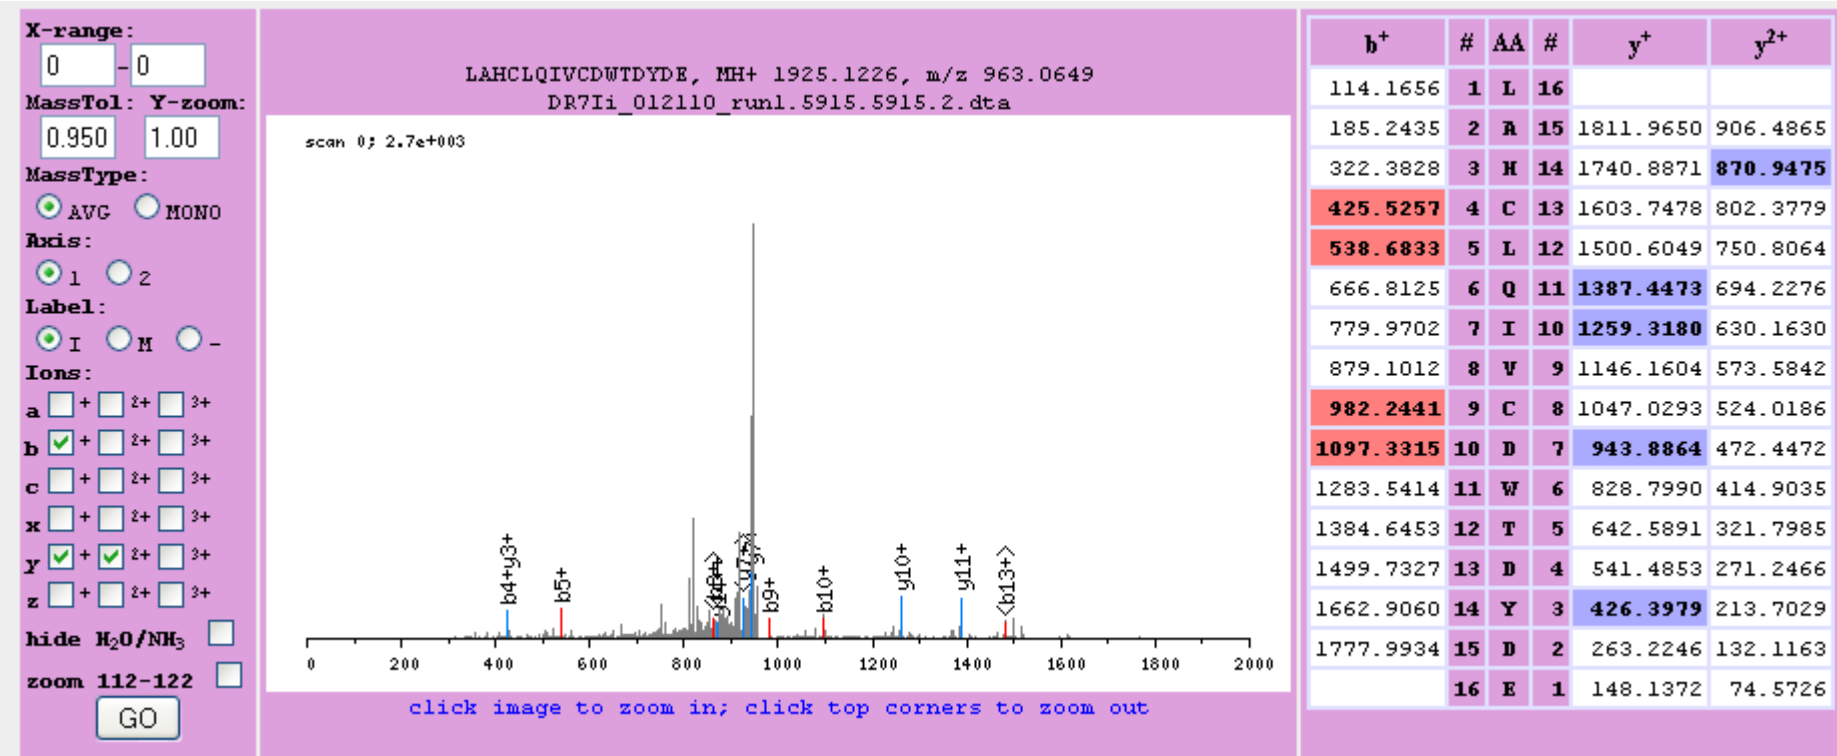

# KEYAIKLLAADAGKPPLNQS

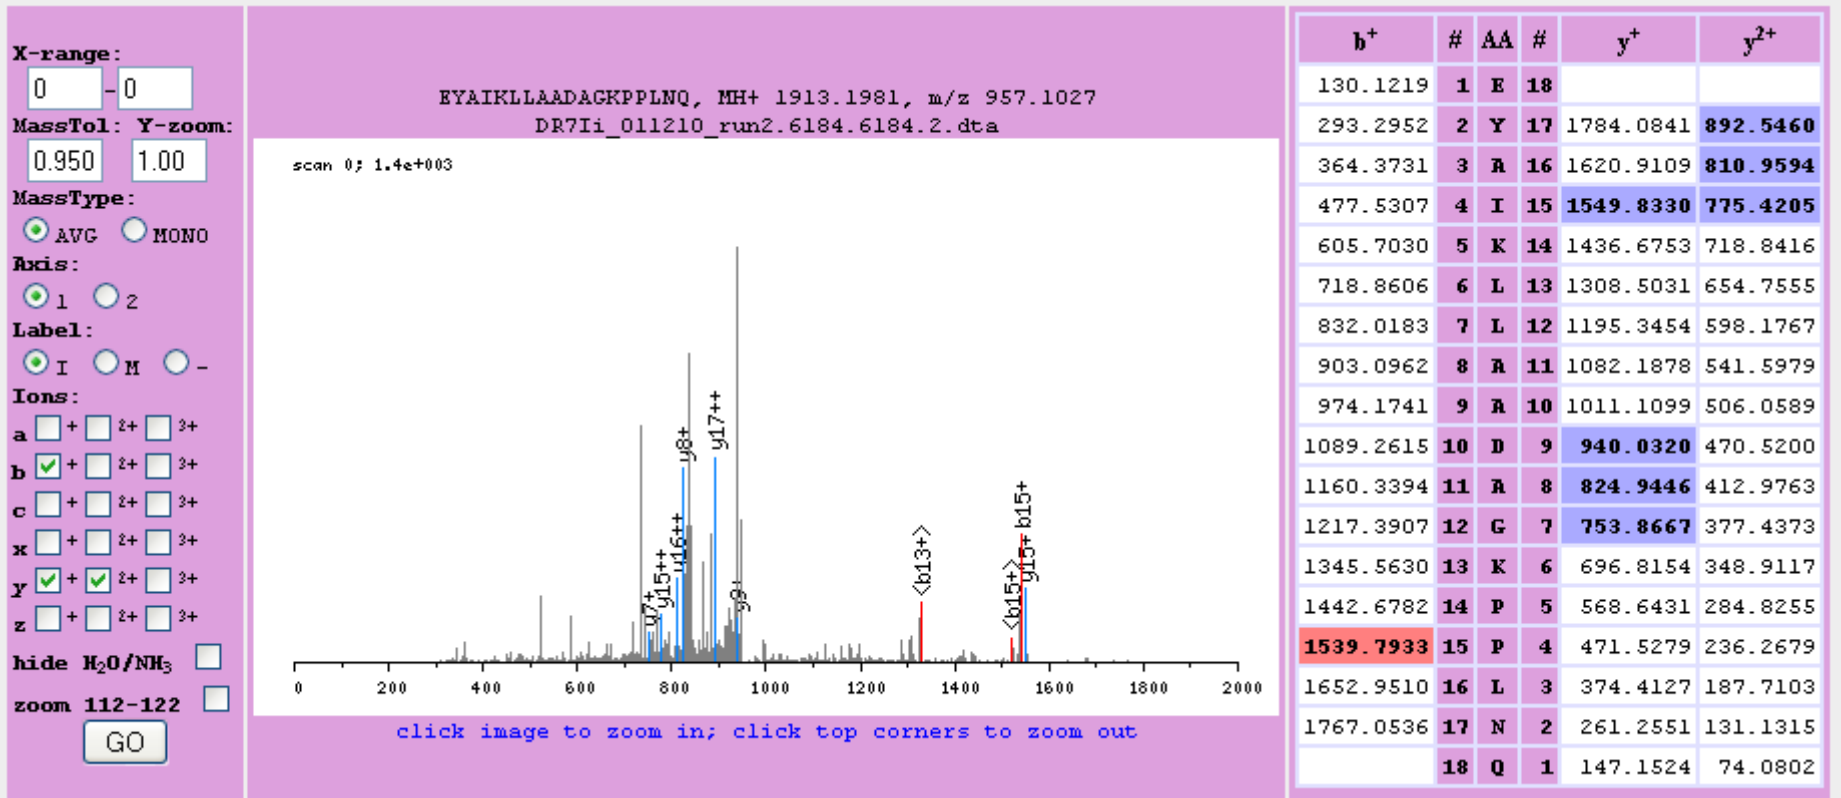

# ALPLQREMKMFLEKLC

X-range:  -

MassTol:  Y-zoom:

MassType:  AVG  MONO

Axis:  1  2

Label:  I  M  -

Ions:  a  +  2+  3+  b  +  2+  3+  c  +  2+  3+  x  +  2+  3+  y  +  2+  3+  z  +  2+  3+  hide H<sub>2</sub>O/NH<sub>3</sub>

zoom

LPLQREMKMFLEKL, MH+ 1777.2224, m/z 889.1148  
DR7Ii\_012110\_run1.5027.5027.2.dta

scan 0; 1.6e+003

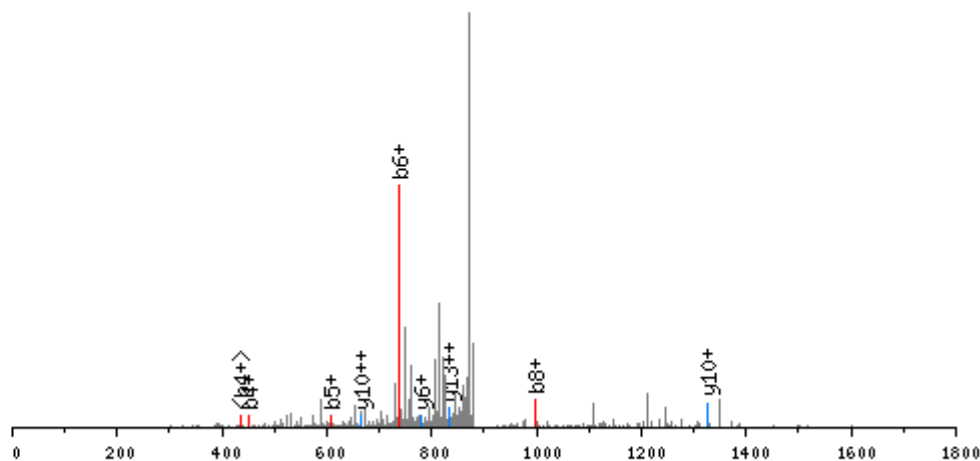

click image to zoom in; click top corners to zoom out

| b <sup>+</sup> | #  | AA | #  | y <sup>+</sup> | y <sup>2+</sup> |
|----------------|----|----|----|----------------|-----------------|
| 114.1656       | 1  | L  | 14 |                |                 |
| 211.2808       | 2  | P  | 13 | 1664.0647      | 832.5363        |
| 324.4384       | 3  | L  | 12 | 1566.9495      | 783.9787        |
| 452.5676       | 4  | Q  | 11 | 1453.7919      | 727.3999        |
| 608.7533       | 5  | R  | 10 | 1325.6627      | 663.3353        |
| 737.8673       | 6  | E  | 9  | 1169.4770      | 585.2425        |
| 869.0633       | 7  | M  | 8  | 1040.3630      | 520.6855        |
| 997.2356       | 8  | K  | 7  | 909.1670       | 455.0874        |
| 1128.4317      | 9  | M  | 6  | 780.9947       | 391.0013        |
| 1275.6055      | 10 | F  | 5  | 649.7986       | 325.4033        |
| 1388.7632      | 11 | L  | 4  | 502.6248       | 251.8163        |
| 1517.8772      | 12 | E  | 3  | 389.4671       | 195.2375        |
| 1646.0494      | 13 | K  | 2  | 260.3531       | 130.6805        |
|                | 14 | L  | 1  | 132.1809       | 66.5944         |

# DFNPKSSKQAKDVSRM

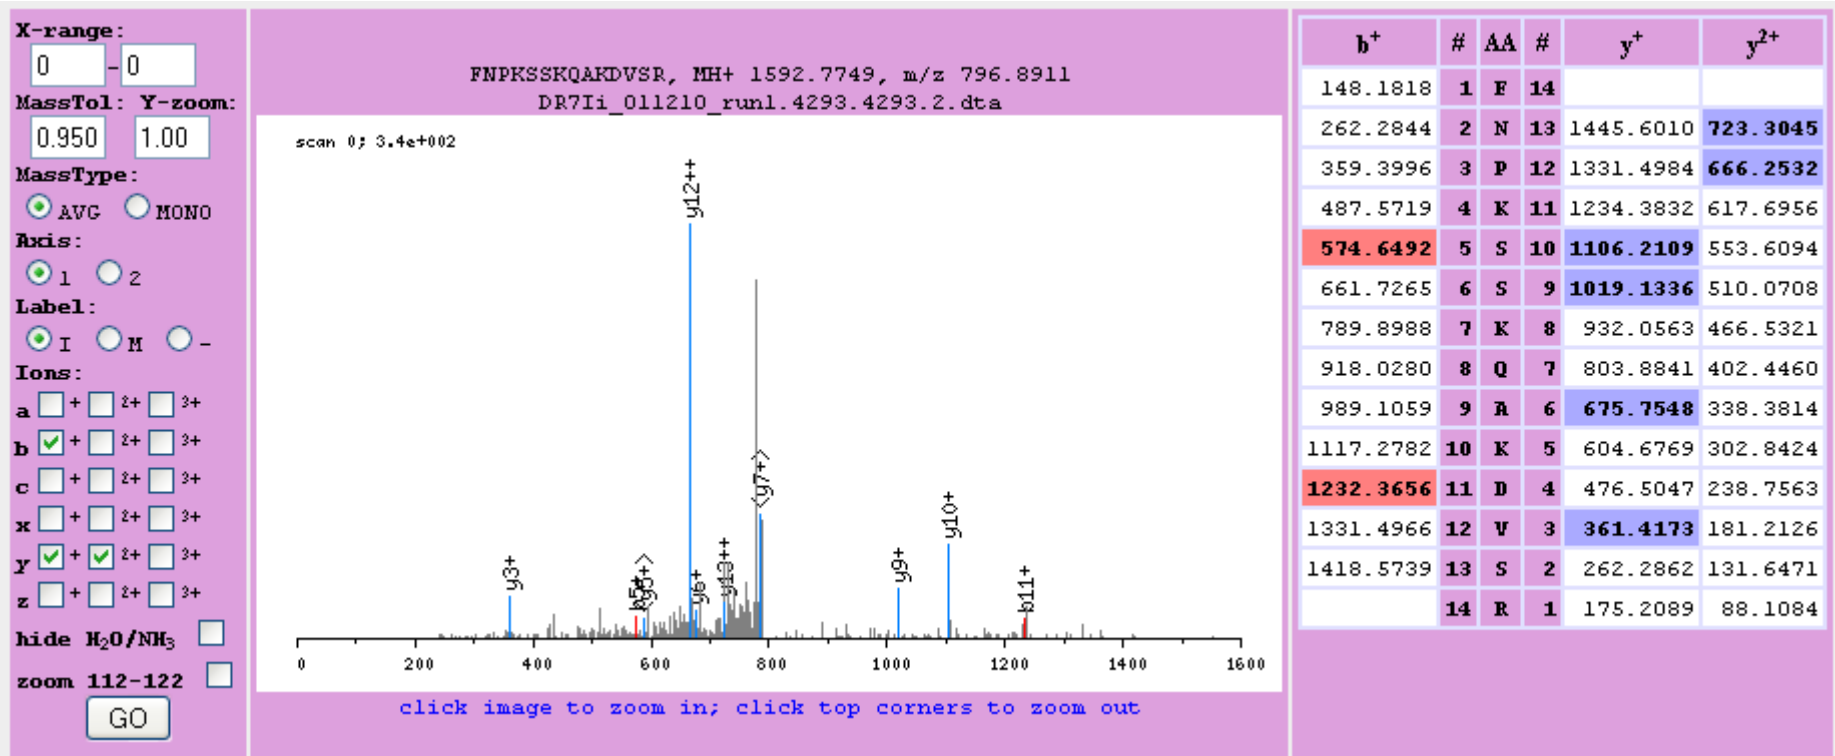

# RKQPPVSPGTALVGSQKEPSEVPTPKR

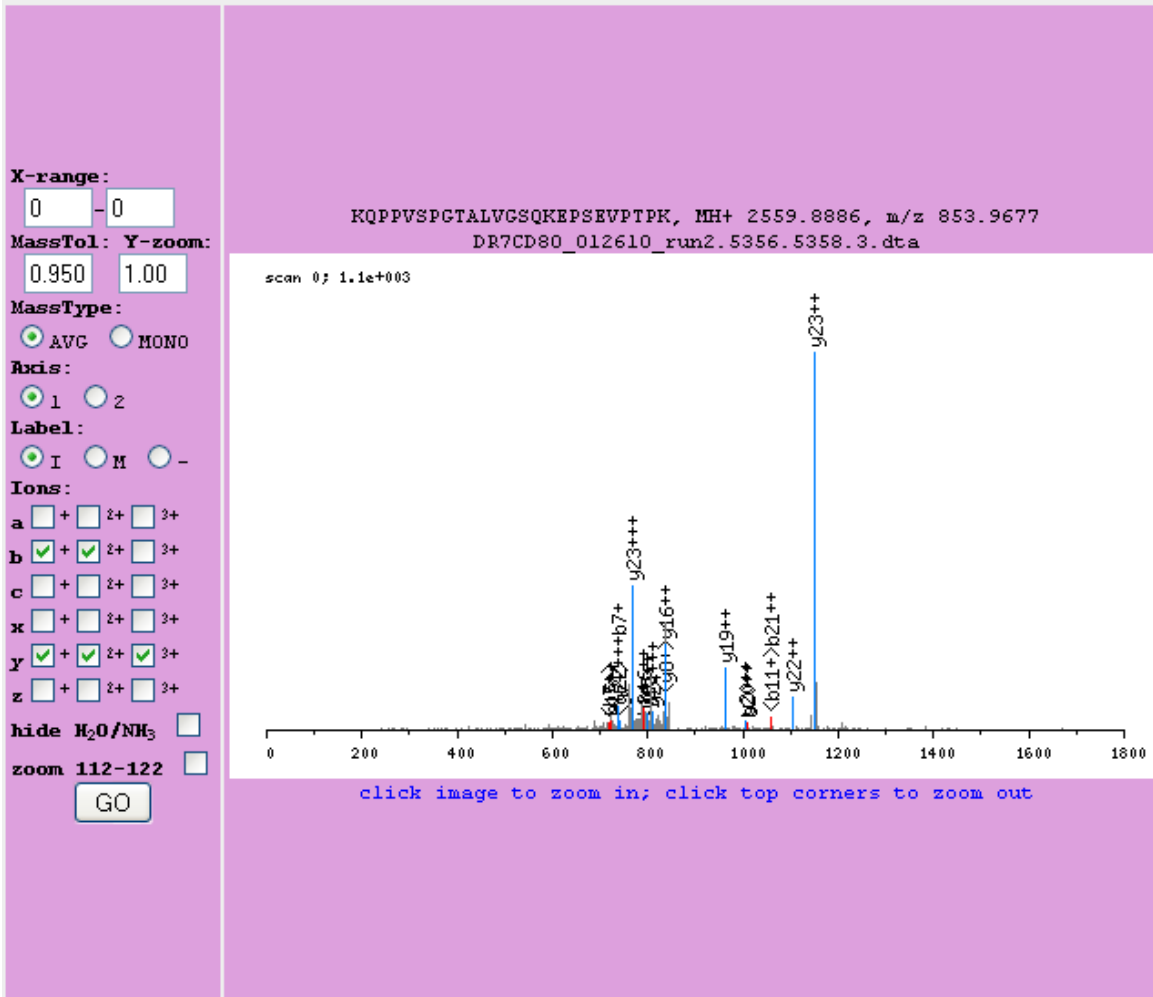

| b <sup>+</sup> | b <sup>2+</sup> | #  | AA | #  | y <sup>+</sup> | y <sup>2+</sup> | y <sup>3+</sup> |
|----------------|-----------------|----|----|----|----------------|-----------------|-----------------|
| 129.1802       | 65.0941         | 1  | K  | 25 |                |                 |                 |
| 257.3094       | 129.1587        | 2  | Q  | 24 | 2431.7163      | 1216.3621       | 811.2441        |
| 354.4246       | 177.7163        | 3  | P  | 23 | 2303.5871      | 1152.2975       | 768.5343        |
| 451.5398       | 226.2739        | 4  | P  | 22 | 2206.4719      | 1103.7399       | 736.1626        |
| 550.6709       | 275.8394        | 5  | V  | 21 | 2109.3567      | 1055.1823       | 703.7909        |
| 637.7482       | 319.3781        | 6  | S  | 20 | 2010.2256      | 1005.6168       | 670.7472        |
| 734.8633       | 367.9356        | 7  | P  | 19 | 1923.1483      | 962.0781        | 641.7214        |
| 791.9147       | 396.4613        | 8  | G  | 18 | 1826.0332      | 913.5206        | 609.3497        |
| 893.0185       | 447.0132        | 9  | T  | 17 | 1768.9818      | 884.9949        | 590.3326        |
| 964.0964       | 482.5522        | 10 | R  | 16 | 1667.8780      | 834.4430        | 556.6313        |
| 1077.2541      | 539.1310        | 11 | L  | 15 | 1596.8001      | 798.9040        | 532.9386        |
| 1176.3851      | 588.6965        | 12 | V  | 14 | 1483.6424      | 742.3252        | 495.2194        |
| 1233.4365      | 617.2222        | 13 | G  | 13 | 1384.5114      | 692.7597        | 462.1757        |
| 1320.5138      | 660.7609        | 14 | S  | 12 | 1327.4600      | 664.2340        | 443.1586        |
| 1448.6430      | 724.8255        | 15 | Q  | 11 | 1240.3827      | 620.6953        | 414.1329        |
| 1576.8153      | 788.9116        | 16 | K  | 10 | 1112.2535      | 556.6307        | 371.4231        |
| 1705.9292      | 853.4686        | 17 | E  | 9  | 984.0812       | 492.5446        | 328.6990        |
| 1803.0444      | 902.0262        | 18 | P  | 8  | 854.9673       | 427.9876        | 285.6610        |
| 1890.1217      | 945.5648        | 19 | S  | 7  | 757.8521       | 379.4300        | 253.2893        |
| 2019.2357      | 1010.1218       | 20 | E  | 6  | 670.7748       | 335.8914        | 224.2636        |
| 2118.3668      | 1059.6874       | 21 | V  | 5  | 541.6608       | 271.3344        | 181.2256        |
| 2215.4819      | 1108.2449       | 22 | P  | 4  | 442.5297       | 221.7688        | 148.1819        |
| 2316.5858      | 1158.7969       | 23 | T  | 3  | 345.4146       | 173.2113        | 115.8101        |
| 2413.7010      | 1207.3545       | 24 | P  | 2  | 244.3107       | 122.6593        | 82.1089         |
|                |                 | 25 | K  | 1  | 147.1955       | 74.1017         | 49.7371         |

# VAKANSLEPEPWFFKNLSR

**X-range:**  
 -   
**MassTol:**  **Y-zoom:**   
**MassType:**  
 AVG  MONO  
**Axis:**  
 1  2  
**Label:**  
 I  M  -  
**Ions:**  
**a**  +  2+  3+  
**b**  +  2+  3+  
**c**  +  2+  3+  
**x**  +  2+  3+  
**y**  +  2+  3+  
**z**  +  2+  3+  
 hide H<sub>2</sub>O/NH<sub>3</sub>  
**zoom** 112-122

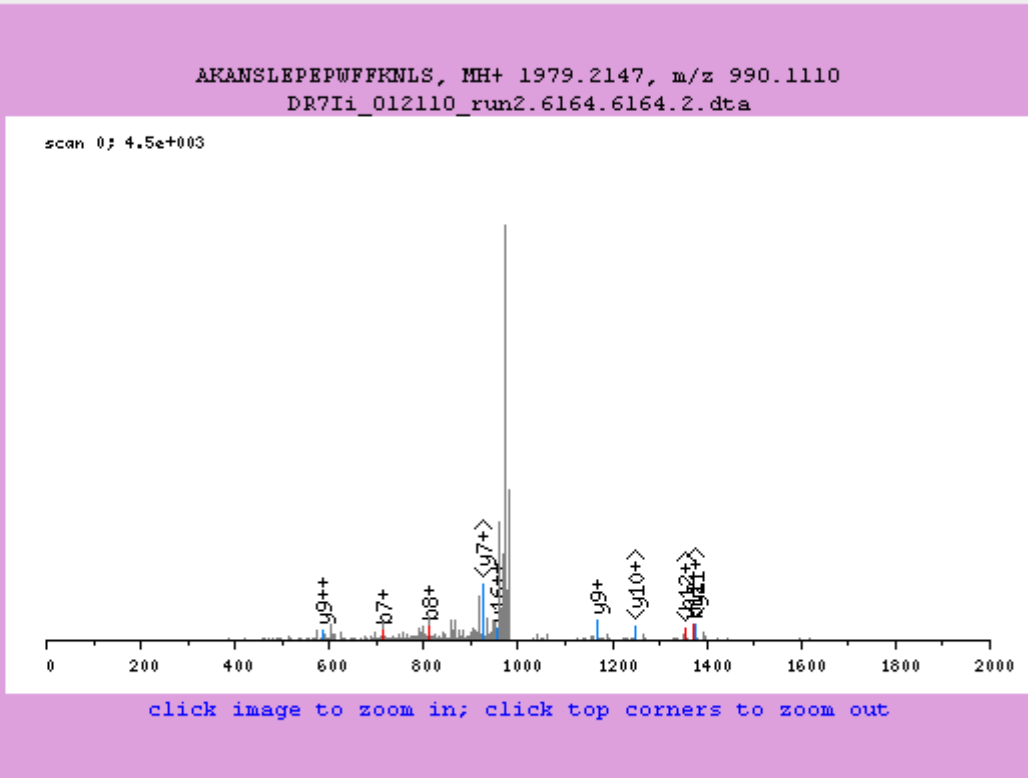

| b <sup>+</sup> | #  | AA | #  | y <sup>+</sup> | y <sup>2+</sup> |
|----------------|----|----|----|----------------|-----------------|
| 72.0858        | 1  | R  | 17 |                |                 |
| 200.2581       | 2  | K  | 16 | 1908.1368      | 954.5724        |
| 271.3360       | 3  | R  | 15 | 1779.9645      | 890.4862        |
| 385.4387       | 4  | N  | 14 | 1708.8866      | 854.9473        |
| 472.5160       | 5  | S  | 13 | 1594.7840      | 797.8959        |
| 585.6736       | 6  | L  | 12 | 1507.7067      | 754.3573        |
| 714.7876       | 7  | E  | 11 | 1394.5490      | 697.7785        |
| 811.9028       | 8  | P  | 10 | 1265.4350      | 633.2215        |
| 941.0167       | 9  | E  | 9  | 1168.3199      | 584.6639        |
| 1038.1319      | 10 | P  | 8  | 1039.2059      | 520.1069        |
| 1224.3418      | 11 | W  | 7  | 942.0907       | 471.5493        |
| 1371.5157      | 12 | F  | 6  | 755.8808       | 378.4444        |
| 1518.6895      | 13 | F  | 5  | 608.7069       | 304.8574        |
| 1646.8618      | 14 | K  | 4  | 461.5331       | 231.2705        |
| 1760.9645      | 15 | N  | 3  | 333.3608       | 167.1844        |
| 1874.1221      | 16 | L  | 2  | 219.2582       | 110.1330        |
|                | 17 | S  | 1  | 106.1005       | 53.5542         |

# WYARQDEQLQKTKANNRAAEAF

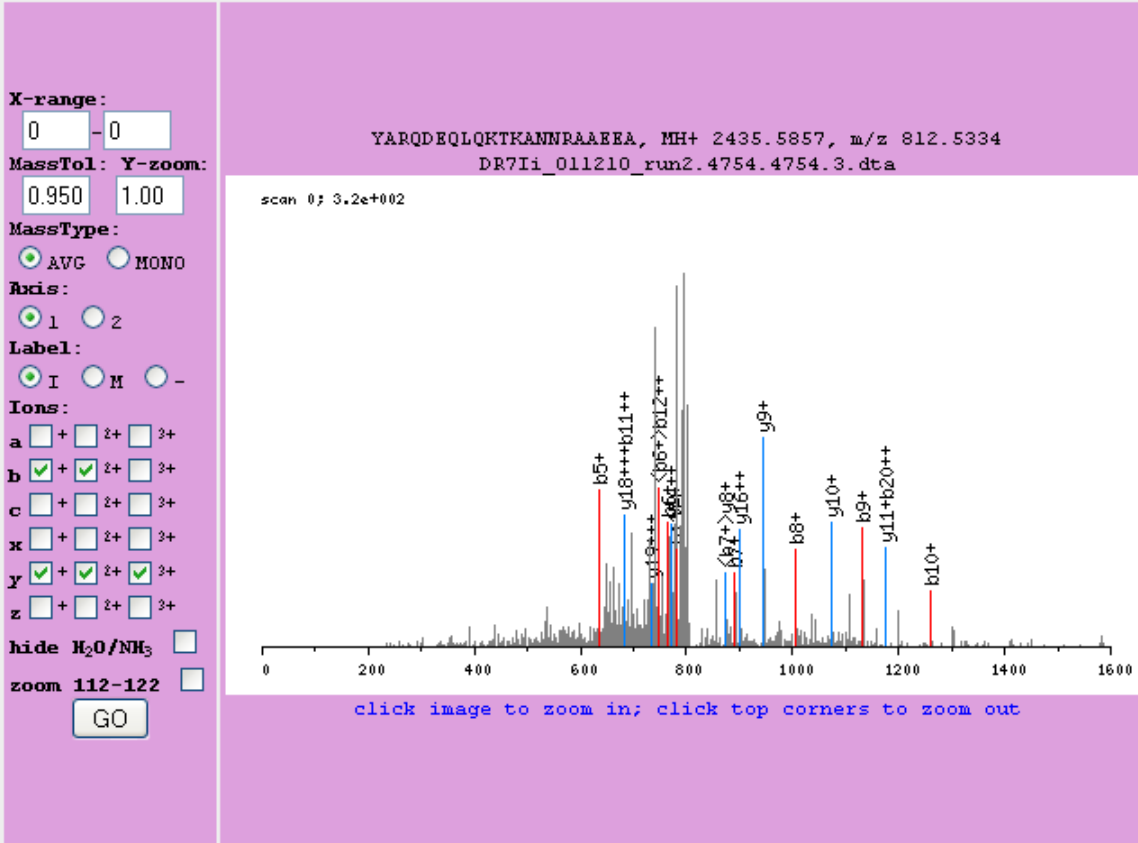

| b <sup>+</sup>   | b <sup>2+</sup>  | #  | AA | #  | y <sup>+</sup>   | y <sup>2+</sup> | y <sup>3+</sup> |
|------------------|------------------|----|----|----|------------------|-----------------|-----------------|
| 164.1812         | 82.5946          | 1  | Y  | 21 |                  |                 |                 |
| 235.2591         | 118.1335         | 2  | R  | 20 | 2272.4124        | 1136.7102       | 758.1428        |
| 391.4448         | 196.2264         | 3  | R  | 19 | 2201.3345        | 1101.1712       | <b>734.4501</b> |
| 519.5740         | 260.2910         | 4  | Q  | 18 | 2045.1489        | 1023.0784       | <b>682.3882</b> |
| <b>634.6614</b>  | 317.8347         | 5  | D  | 17 | 1917.0196        | 959.0138        | 639.6785        |
| <b>763.7754</b>  | 382.3917         | 6  | E  | 16 | 1801.9322        | <b>901.4701</b> | 601.3160        |
| <b>891.9046</b>  | 446.4563         | 7  | Q  | 15 | 1672.8183        | 836.9131        | 558.2780        |
| <b>1005.0622</b> | 503.0351         | 8  | L  | 14 | 1544.6890        | <b>772.8485</b> | 515.5683        |
| <b>1133.1915</b> | 567.0997         | 9  | Q  | 13 | 1431.5314        | 716.2697        | 477.8491        |
| <b>1261.3637</b> | 631.1858         | 10 | K  | 12 | 1303.4022        | 652.2051        | 435.1394        |
| 1362.4676        | <b>681.7378</b>  | 11 | T  | 11 | <b>1175.2299</b> | 588.1189        | 392.4153        |
| 1490.6399        | <b>745.8239</b>  | 12 | K  | 10 | <b>1074.1260</b> | 537.5670        | 358.7140        |
| 1561.7178        | <b>781.3629</b>  | 13 | R  | 9  | <b>945.9537</b>  | 473.4808        | 315.9899        |
| 1675.8204        | 838.4142         | 14 | N  | 8  | <b>874.8758</b>  | 437.9419        | 292.2972        |
| 1789.9231        | 895.4655         | 15 | N  | 7  | 760.7732         | 380.8906        | 254.2630        |
| 1946.1088        | 973.5584         | 16 | R  | 6  | 646.6706         | 323.8393        | 216.2288        |
| 2017.1867        | 1009.0973        | 17 | R  | 5  | 490.4849         | 245.7464        | 164.1669        |
| 2088.2646        | 1044.6363        | 18 | R  | 4  | 419.4070         | 210.2075        | 140.4743        |
| 2217.3785        | 1109.1932        | 19 | E  | 3  | 348.3291         | 174.6685        | 116.7817        |
| 2346.4925        | <b>1173.7502</b> | 20 | E  | 2  | 219.2151         | 110.1115        | 73.7437         |
|                  |                  | 21 | R  | 1  | 90.1011          | 45.5545         | 30.7057         |



# FDKEGNGTVMGAEIRHVLV

**X-range:**  
 -   
**MassTol:**  **Y-zoom:**   
**MassType:**  
 AVG  MONO  
**Axis:**  
 1  2  
**Label:**  
 I  M  -  
**Ions:**  
a  +  2+  3+  
b  +  2+  3+  
c  +  2+  3+  
x  +  2+  3+  
y  +  2+  3+  
z  +  2+  3+  
 hide H<sub>2</sub>O/NH<sub>3</sub>  
**zoom**

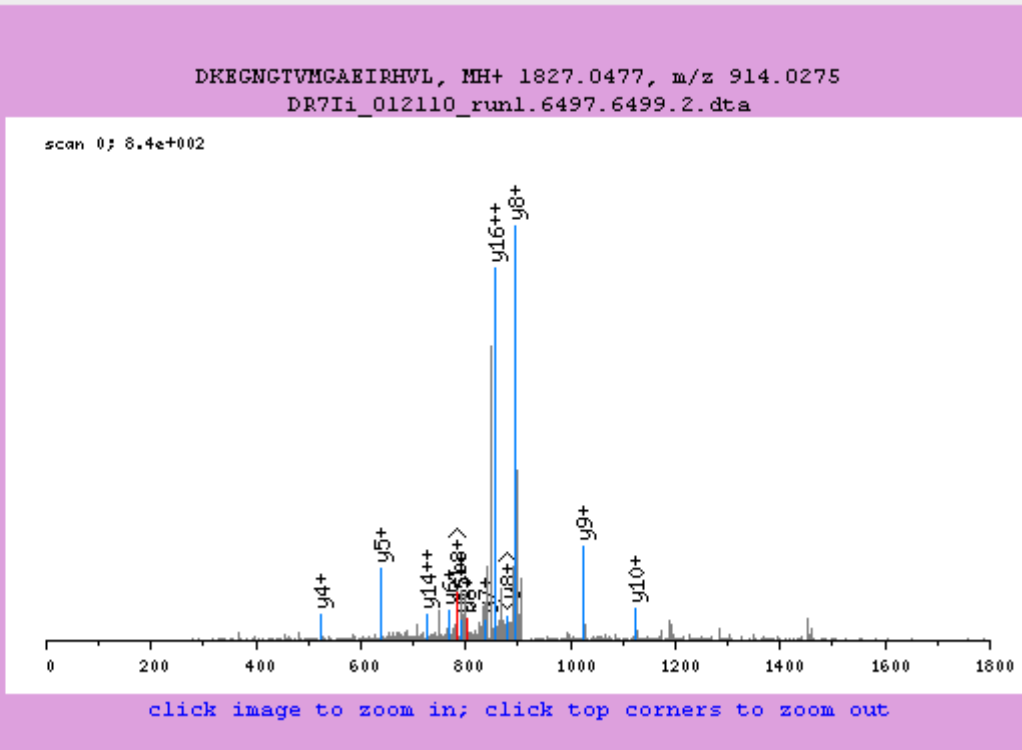

| b <sup>+</sup> | #  | AA | #  | y <sup>+</sup> | y <sup>2+</sup> |
|----------------|----|----|----|----------------|-----------------|
| 116.0953       | 1  | D  | 17 |                |                 |
| 244.2676       | 2  | K  | 16 | 1711.9603      | 856.4841        |
| 373.3816       | 3  | E  | 15 | 1583.7880      | 792.3980        |
| 430.4329       | 4  | G  | 14 | 1454.6740      | 727.8410        |
| 544.5356       | 5  | N  | 13 | 1397.6227      | 699.3153        |
| 601.5869       | 6  | G  | 12 | 1283.5200      | 642.2640        |
| 702.6908       | 7  | T  | 11 | 1226.4687      | 613.7383        |
| 801.8218       | 8  | V  | 10 | 1125.3648      | 563.1864        |
| 933.0179       | 9  | M  | 9  | 1026.2338      | 513.6209        |
| 990.0692       | 10 | G  | 8  | 895.0377       | 448.0228        |
| 1061.1471      | 11 | R  | 7  | 837.9864       | 419.4972        |
| 1190.2611      | 12 | E  | 6  | 766.9085       | 383.9582        |
| 1303.4187      | 13 | I  | 5  | 637.7945       | 319.4012        |
| 1459.6044      | 14 | R  | 4  | 524.6369       | 262.8224        |
| 1596.7437      | 15 | H  | 3  | 368.4512       | 184.7296        |
| 1695.8747      | 16 | V  | 2  | 231.3119       | 116.1599        |
|                | 17 | L  | 1  | 132.1809       | 66.5944         |

# TYRQLLEGESRM

**X-range:**  
 -

**MassTol:**  **Y-zoom:**

**MassType:**  
 AVG  MONO

**Axis:**  
 1  2

**Label:**  
 I  M  -

**Ions:**

a  +  2+  3+

b  +  2+  3+

c  +  2+  3+

x  +  2+  3+

y  +  2+  3+

z  +  2+  3+

hide H<sub>2</sub>O/NH<sub>3</sub>

zoom 112-122

TYRQLLEGESR, MH+ 1380.4829, m/z 690.7451  
 DR7Ii\_012110\_run1.4977.4979.2.dta

scan 0; 1.2e+003

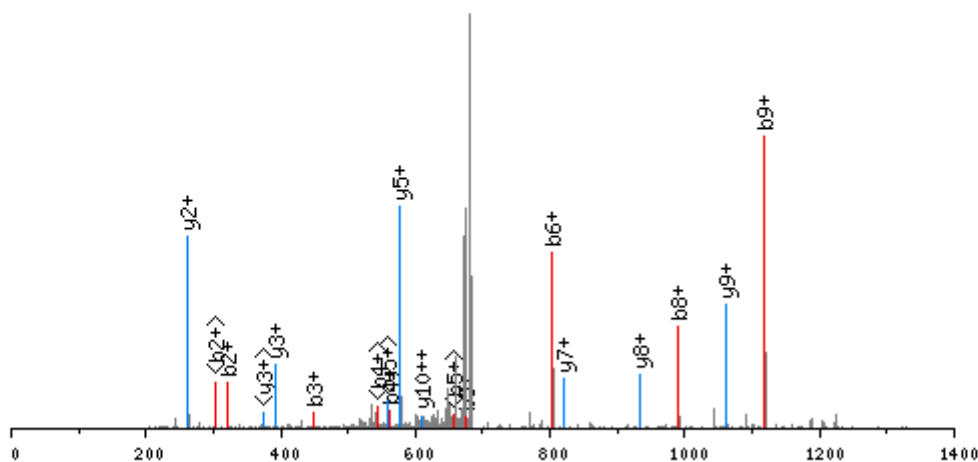

click image to zoom in; click top corners to zoom out

| b <sup>+</sup> | #  | AA | #  | y <sup>+</sup> | y <sup>2+</sup> |
|----------------|----|----|----|----------------|-----------------|
| 164.1812       | 1  | Y  | 11 |                |                 |
| 320.3669       | 2  | R  | 10 | 1217.3096      | 609.1588        |
| 448.4961       | 3  | Q  | 9  | 1061.1240      | 531.0659        |
| 561.6537       | 4  | L  | 8  | 932.9947       | 467.0013        |
| 674.8114       | 5  | L  | 7  | 819.8371       | 410.4225        |
| 803.9254       | 6  | E  | 6  | 706.6795       | 353.8437        |
| 860.9767       | 7  | G  | 5  | 577.5655       | 289.2867        |
| 990.0907       | 8  | E  | 4  | 520.5142       | 260.7610        |
| 1119.2046      | 9  | E  | 3  | 391.4002       | 196.2041        |
| 1206.2819      | 10 | S  | 2  | 262.2862       | 131.6471        |
|                | 11 | R  | 1  | 175.2089       | 88.1084         |

# RATGGGLSSVGGGSSTIKYTTTSSSSRK

X-range:  -

MassTol:  Y-zoom:

MassType:  
 AVG  MONO

Axis:  
 1  2

Label:  
 I  M  -

Ions:  
a  +  2+  3+  
b  +  2+  3+  
c  +  2+  3+  
x  +  2+  3+  
y  +  2+  3+  
z  +  2+  3+

hide H<sub>2</sub>O/NH<sub>3</sub>

zoom

ATGGGLSSVGGGSSTIKYTTTSSSSR, MH+ 2407.5244, m/z 1204.2658  
 DR7CD80\_012610\_run2.5258.5258.2.dta

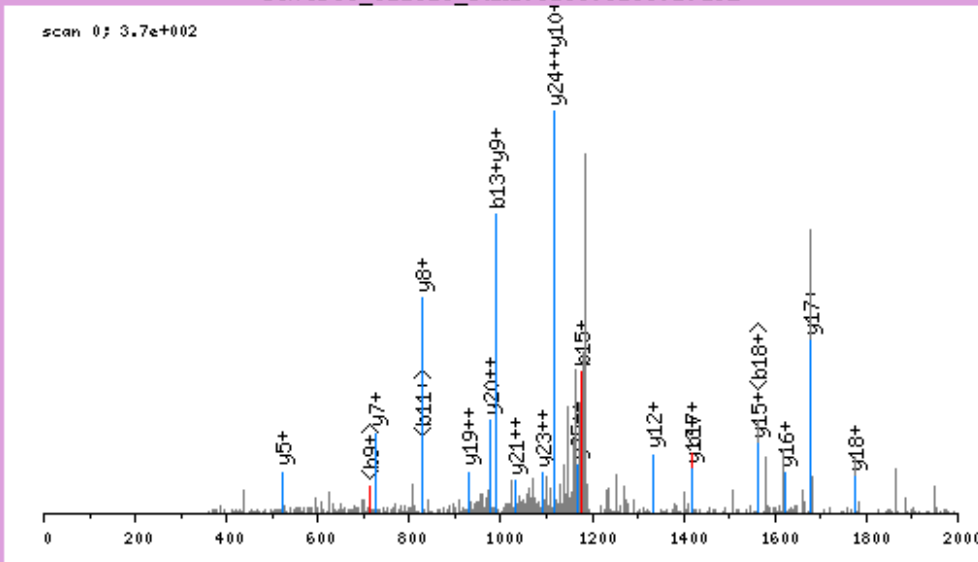

click image to zoom in; click top corners to zoom out

| b <sup>+</sup> | #  | AA | #  | y <sup>+</sup> | y <sup>2+</sup> |
|----------------|----|----|----|----------------|-----------------|
| 72.0858        | 1  | R  | 26 |                |                 |
| 173.1897       | 2  | T  | 25 | 2336.4465      | 1168.7272       |
| 230.2410       | 3  | G  | 24 | 2235.3426      | 1118.1753       |
| 287.2924       | 4  | G  | 23 | 2178.2913      | 1089.6496       |
| 344.3437       | 5  | G  | 22 | 2121.2400      | 1061.1240       |
| 457.5013       | 6  | L  | 21 | 2064.1887      | 1032.5983       |
| 544.5786       | 7  | S  | 20 | 1951.0310      | 976.0195        |
| 631.6559       | 8  | S  | 19 | 1863.9537      | 932.4808        |
| 730.7870       | 9  | V  | 18 | 1776.8764      | 888.9422        |
| 787.8383       | 10 | G  | 17 | 1677.7454      | 839.3767        |
| 844.8896       | 11 | G  | 16 | 1620.6940      | 810.8510        |
| 901.9409       | 12 | G  | 15 | 1563.6427      | 782.3253        |
| 989.0182       | 13 | S  | 14 | 1506.5914      | 753.7997        |
| 1076.0955      | 14 | S  | 13 | 1419.5141      | 710.2610        |
| 1177.1994      | 15 | T  | 12 | 1332.4368      | 666.7224        |
| 1290.3571      | 16 | I  | 11 | 1231.3329      | 616.1704        |
| 1418.5293      | 17 | K  | 10 | 1118.1753      | 559.5916        |
| 1581.7026      | 18 | Y  | 9  | 990.0030       | 495.5055        |
| 1682.8065      | 19 | T  | 8  | 826.8297       | 413.9188        |
| 1783.9104      | 20 | T  | 7  | 725.7259       | 363.3669        |
| 1885.0142      | 21 | T  | 6  | 624.6220       | 312.8150        |
| 1972.0915      | 22 | S  | 5  | 523.5181       | 262.2630        |
| 2059.1688      | 23 | S  | 4  | 436.4408       | 218.7244        |
| 2146.2461      | 24 | S  | 3  | 349.3635       | 175.1857        |
| 2233.3234      | 25 | S  | 2  | 262.2862       | 131.6471        |
|                | 26 | R  | 1  | 175.2089       | 88.1084         |

# ATADILRGLLSNVLCRLCSKY

X-range:

0 - 0

MassTol: Y-zoom:

0.950 1.00

MassType:

AVG  MONO

Axis:

1  2

Label:

I  M  -

Ions:

a  +  2+  3+

b  +  2+  3+

c  +  2+  3+

x  +  2+  3+

y  +  2+  3+

z  +  2+  3+

hide H<sub>2</sub>O/NH<sub>3</sub>

zoom 112-122

GO

TADILRGLLSNVLCRLCSK, MH+ 2076.5073, m/z 692.8406  
DR7CD80\_012610\_run2.5238.5238.3.dta

scan 0: 2.0e+003

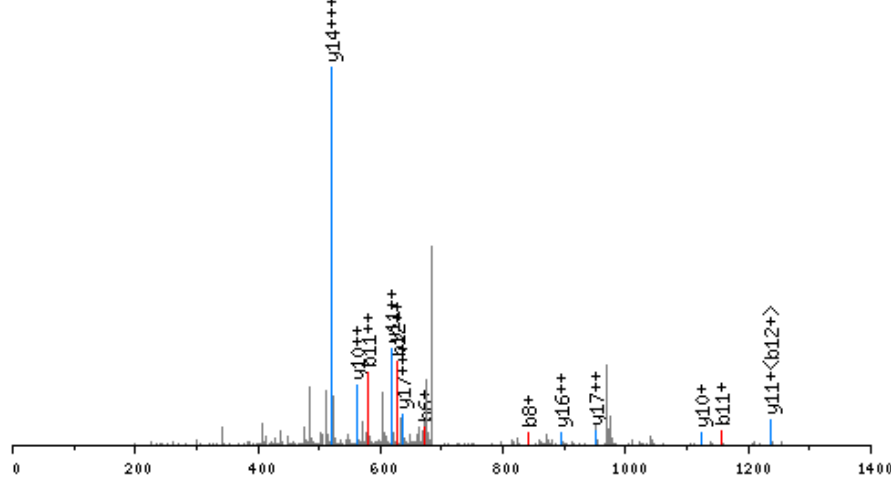

click image to zoom in; click top corners to zoom out

| b <sup>+</sup>   | b <sup>2+</sup> | #  | AA | #  | y <sup>+</sup>   | y <sup>2+</sup> | y <sup>3+</sup> |
|------------------|-----------------|----|----|----|------------------|-----------------|-----------------|
| 102.1118         | 51.5599         | 1  | T  | 19 |                  |                 |                 |
| 173.1897         | 87.0988         | 2  | R  | 18 | 1975.4034        | 988.2057        | 659.1398        |
| 288.2771         | 144.6425        | 3  | D  | 17 | 1904.3255        | <b>952.6667</b> | <b>635.4471</b> |
| 401.4348         | 201.2214        | 4  | I  | 16 | 1789.2381        | <b>895.1230</b> | 597.0847        |
| 514.5924         | 257.8002        | 5  | L  | 15 | 1676.0805        | 838.5442        | 559.3655        |
| <b>670.7781</b>  | 335.8930        | 6  | R  | 14 | 1562.9228        | 781.9654        | <b>521.6462</b> |
| 727.8294         | 364.4187        | 7  | G  | 13 | 1406.7372        | 703.8725        | 469.5843        |
| <b>840.9870</b>  | 420.9975        | 8  | L  | 12 | 1349.6858        | 675.3469        | 450.5672        |
| 954.1447         | 477.5763        | 9  | L  | 11 | <b>1236.5282</b> | <b>618.7681</b> | 412.8480        |
| 1041.2220        | <b>521.1150</b> | 10 | S  | 10 | <b>1123.3706</b> | <b>562.1892</b> | 375.1288        |
| <b>1155.3246</b> | <b>578.1663</b> | 11 | N  | 9  | 1036.2933        | 518.6506        | 346.1030        |
| 1254.4557        | <b>627.7318</b> | 12 | V  | 8  | 922.1906         | 461.5993        | 308.0688        |
| 1367.6133        | 684.3106        | 13 | L  | 7  | 823.0596         | 412.0337        | 275.0251        |
| 1470.7562        | 735.8821        | 14 | C  | 6  | 709.9019         | 355.4549        | 237.3059        |
| 1626.9419        | 813.9749        | 15 | R  | 5  | 606.7590         | 303.8835        | 202.9250        |
| 1740.0995        | 870.5537        | 16 | L  | 4  | 450.5733         | 225.7906        | 150.8631        |
| 1843.2424        | 922.1252        | 17 | C  | 3  | 337.4157         | 169.2118        | 113.1439        |
| 1930.3197        | 965.6638        | 18 | S  | 2  | 234.2728         | 117.6404        | 78.7629         |
|                  |                 | 19 | K  | 1  | 147.1955         | 74.1017         | 49.7371         |

# LVWVPSDKSGFEPASLKEEV

X-range:  -

MassTol:  Y-zoom:

MassType:  
 AVG  MONO

Axis:  
 1  2

Label:  
 I  M  -

Ions:  
a  +  2+  3+  
b  +  2+  3+  
c  +  2+  3+  
x  +  2+  3+  
y  +  2+  3+  
z  +  2+  3+

hide H<sub>2</sub>O/NH<sub>3</sub>

zoom 112-122

VWVPSDKSGFEPASLKEE, MH+ 2006.1921, m/z 1003.5997  
 DR7Ii\_012110\_run1.6517.6517.2.dta

scan 0: 7.7e+02

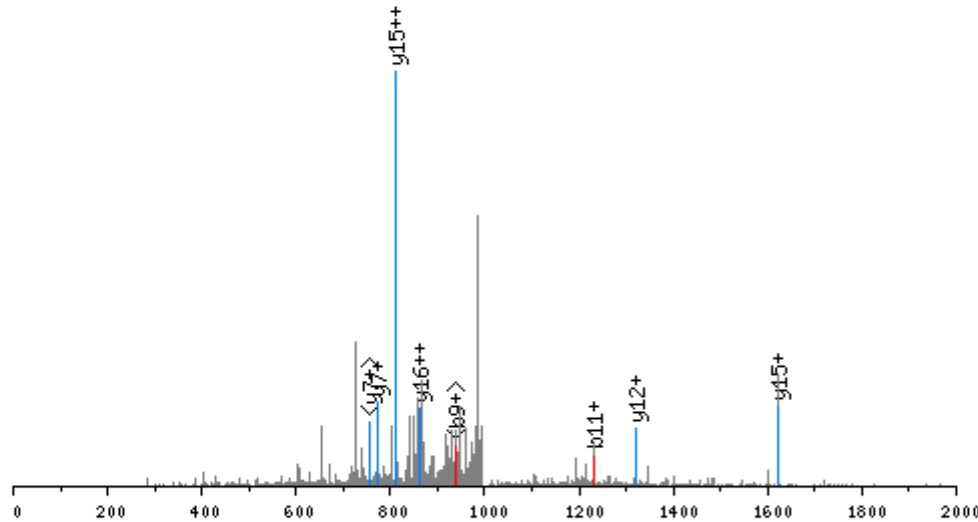

click image to zoom in; click top corners to zoom out

| b <sup>+</sup> | #  | AA | #  | y <sup>+</sup> | y <sup>2+</sup> |
|----------------|----|----|----|----------------|-----------------|
| 100.1390       | 1  | V  | 18 |                |                 |
| 286.3489       | 2  | W  | 17 | 1907.0611      | 954.0345        |
| 385.4800       | 3  | V  | 16 | 1720.8512      | 860.9296        |
| 482.5951       | 4  | P  | 15 | 1621.7201      | 811.3640        |
| 569.6724       | 5  | S  | 14 | 1524.6049      | 762.8064        |
| 684.7598       | 6  | D  | 13 | 1437.5276      | 719.2678        |
| 812.9321       | 7  | K  | 12 | 1322.4402      | 661.7241        |
| 900.0094       | 8  | S  | 11 | 1194.2679      | 597.6379        |
| 957.0607       | 9  | G  | 10 | 1107.1906      | 554.0993        |
| 1104.2346      | 10 | F  | 9  | 1050.1393      | 525.5736        |
| 1233.3486      | 11 | E  | 8  | 902.9655       | 451.9867        |
| 1330.4638      | 12 | P  | 7  | 773.8515       | 387.4297        |
| 1401.5417      | 13 | R  | 6  | 676.7363       | 338.8721        |
| 1488.6190      | 14 | S  | 5  | 605.6584       | 303.3332        |
| 1601.7766      | 15 | L  | 4  | 518.5811       | 259.7945        |
| 1729.9489      | 16 | K  | 3  | 405.4235       | 203.2157        |
| 1859.0629      | 17 | E  | 2  | 277.2512       | 139.1296        |
|                | 18 | E  | 1  | 148.1372       | 74.5726         |

# NYGFSGVMLRGSGIQWDLRKTQPY

X-range:

0 - 0

MassTol: Y-zoom:

0.950 1.00

MassType:

AVG  MONO

Axis:

1  2

Label:

I  M  -

Ions:

a  +  2+  3+

b  +  2+  3+

c  +  2+  3+

x  +  2+  3+

y  +  2+  3+

z  +  2+  3+

hide H<sub>2</sub>O/NH<sub>3</sub>

zoom 112-122

GO

YGFSGVMLRGSGIQWDLRKTQP, MH+ 2497.8487, m/z 1249.4280  
DR7Ii\_011210\_run2.5871.5871.2.dta

scan 0: 1.4e+003

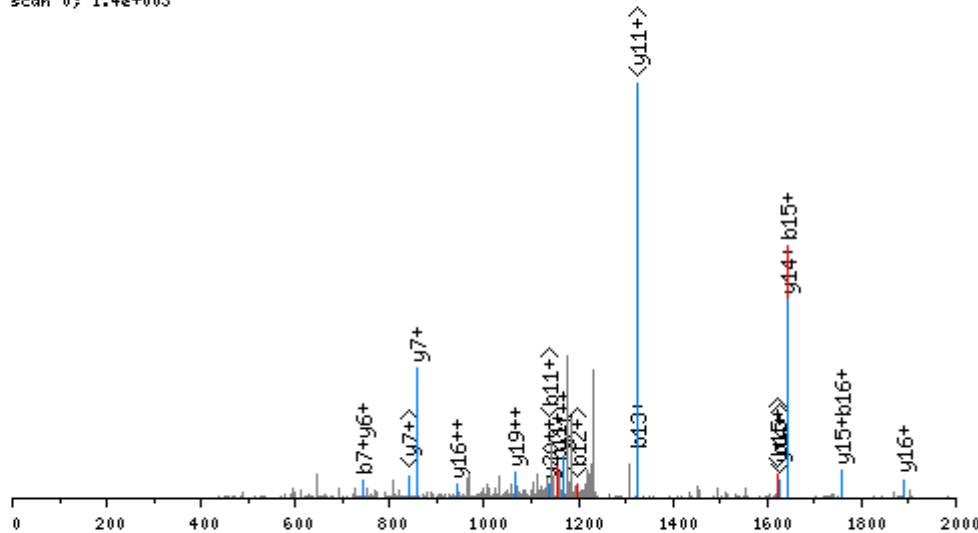

click image to zoom in; click top corners to zoom out

| b <sup>+</sup> | #  | AA | #  | y <sup>+</sup> | y <sup>2+</sup> |
|----------------|----|----|----|----------------|-----------------|
| 164.1812       | 1  | Y  | 22 |                |                 |
| 221.2325       | 2  | G  | 21 | 2334.6754      | 1167.8417       |
| 368.4064       | 3  | F  | 20 | 2277.6241      | 1139.3160       |
| 455.4837       | 4  | S  | 19 | 2130.4503      | 1065.7291       |
| 512.5350       | 5  | G  | 18 | 2043.3730      | 1022.1905       |
| 611.6661       | 6  | V  | 17 | 1986.3216      | 993.6648        |
| 742.8621       | 7  | M  | 16 | 1887.1906      | 944.0993        |
| 856.0198       | 8  | L  | 15 | 1755.9945      | 878.5012        |
| 1012.2054      | 9  | R  | 14 | 1642.8369      | 821.9224        |
| 1069.2568      | 10 | G  | 13 | 1486.6512      | 743.8296        |
| 1156.3341      | 11 | S  | 12 | 1429.5999      | 715.3039        |
| 1213.3854      | 12 | G  | 11 | 1342.5226      | 671.7653        |
| 1326.5430      | 13 | I  | 10 | 1285.4713      | 643.2396        |
| 1454.6722      | 14 | Q  | 9  | 1172.3136      | 586.6608        |
| 1640.8821      | 15 | W  | 8  | 1044.1844      | 522.5962        |
| 1755.9695      | 16 | D  | 7  | 857.9745       | 429.4912        |
| 1869.1272      | 17 | L  | 6  | 742.8871       | 371.9475        |
| 2025.3129      | 18 | R  | 5  | 629.7295       | 315.3687        |
| 2153.4851      | 19 | K  | 4  | 473.5438       | 237.2759        |
| 2254.5890      | 20 | T  | 3  | 345.3715       | 173.1897        |
| 2382.7182      | 21 | Q  | 2  | 244.2676       | 122.6378        |
|                | 22 | P  | 1  | 116.1384       | 58.5732         |

# RRMRLTHCGLQEKHL

X-range:  -

MassTol:  Y-zoom:

MassType:  
 AVG  MONO

Axis:  
 1  2

Label:  
 I  M  -

Ions:  
a  +  2+  3+  
b  +  2+  3+  
c  +  2+  3+  
x  +  2+  3+  
y  +  2+  3+  
z  +  2+  3+

hide H<sub>2</sub>O/NH<sub>3</sub>

zoom

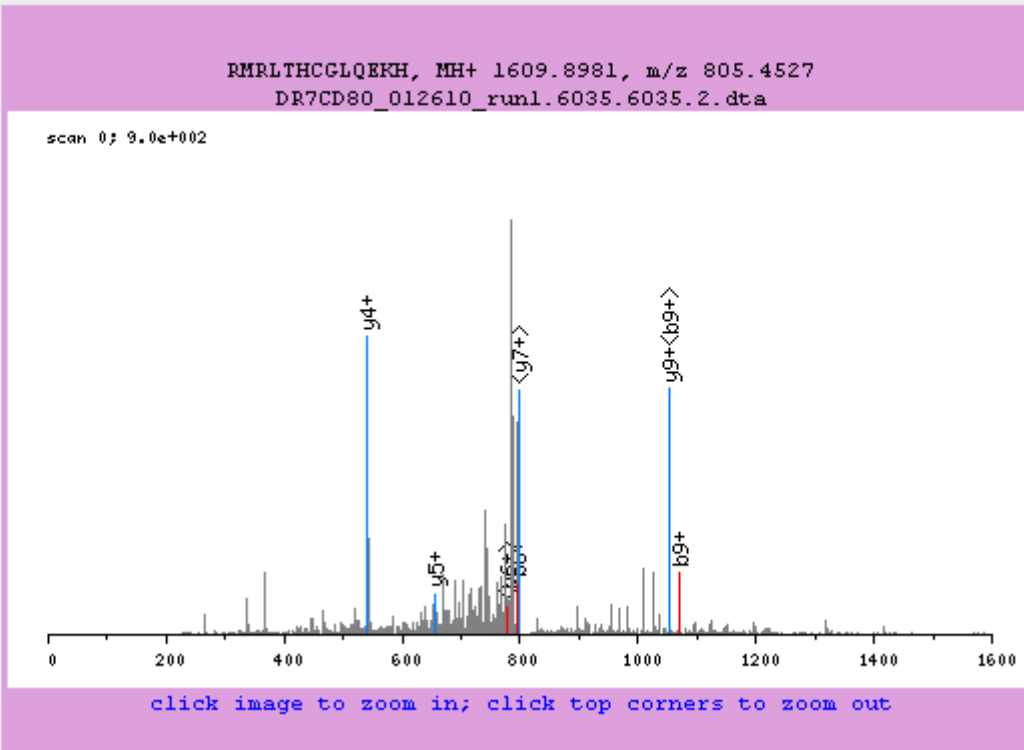

| b <sup>+</sup> | #  | AA | #  | y <sup>+</sup> | y <sup>2+</sup> |
|----------------|----|----|----|----------------|-----------------|
| 157.1936       | 1  | R  | 13 |                |                 |
| 288.3897       | 2  | M  | 12 | 1453.7124      | 727.3602        |
| 444.5754       | 3  | R  | 11 | 1322.5163      | 661.7621        |
| 557.7330       | 4  | L  | 10 | 1166.3306      | 583.6693        |
| 658.8369       | 5  | T  | 9  | 1053.1730      | 527.0905        |
| 795.9762       | 6  | H  | 8  | 952.0691       | 476.5385        |
| 899.1191       | 7  | C  | 7  | 814.9298       | 407.9689        |
| 956.1704       | 8  | G  | 6  | 711.7869       | 356.3974        |
| 1069.3280      | 9  | L  | 5  | 654.7356       | 327.8718        |
| 1197.4572      | 10 | Q  | 4  | 541.5780       | 271.2930        |
| 1326.5712      | 11 | E  | 3  | 413.4488       | 207.2283        |
| 1454.7435      | 12 | K  | 2  | 284.3348       | 142.6714        |
|                | 13 | H  | 1  | 156.1625       | 78.5852         |

# FIAIKPDGVQRGLVGEIIRFE

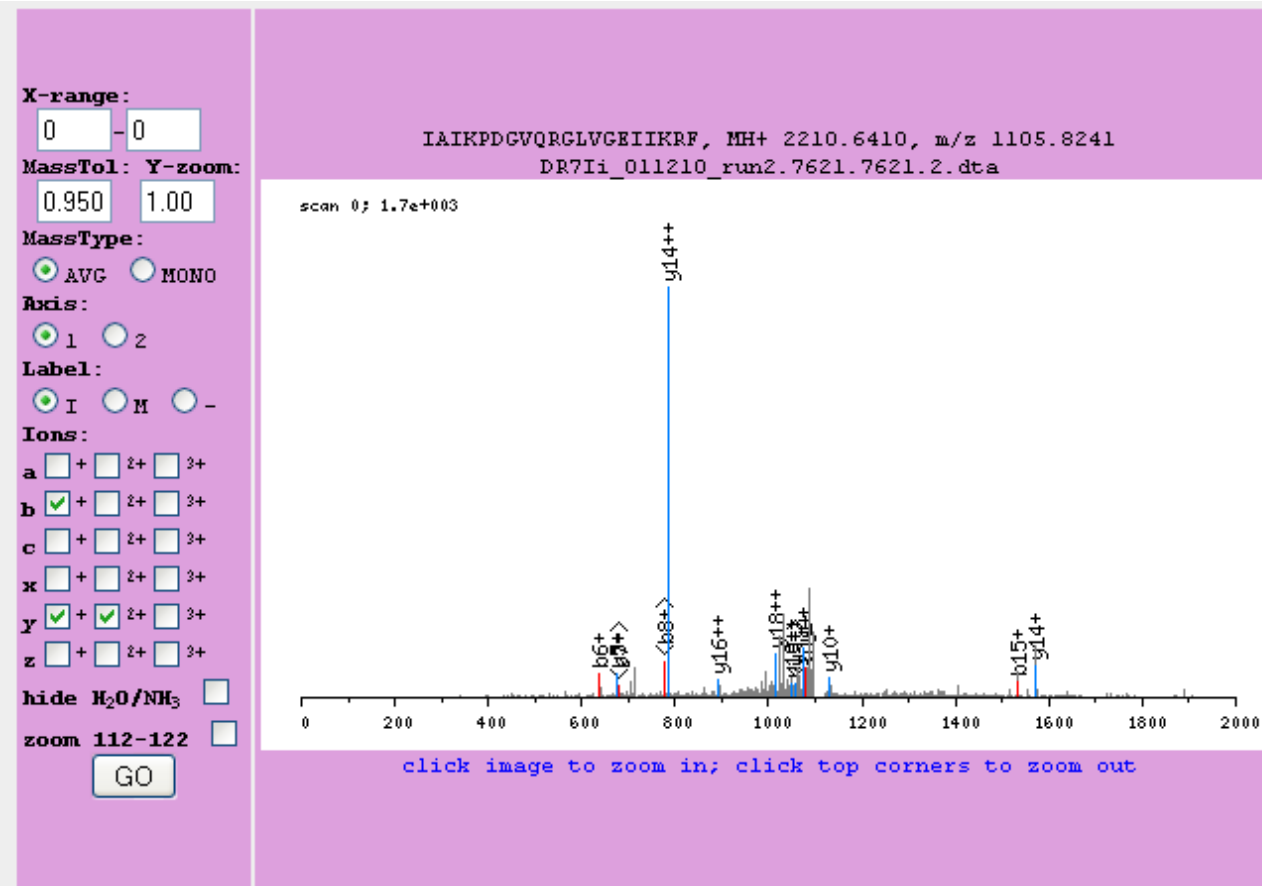

| b <sup>+</sup> | #  | AA | #  | y <sup>+</sup> | y <sup>2+</sup> |
|----------------|----|----|----|----------------|-----------------|
| 114.1656       | 1  | I  | 20 |                |                 |
| 185.2435       | 2  | R  | 19 | 2097.4833      | 1049.2456       |
| 298.4011       | 3  | I  | 18 | 2026.4054      | 1013.7067       |
| 426.5734       | 4  | K  | 17 | 1913.2478      | 957.1279        |
| 523.6886       | 5  | P  | 16 | 1785.0755      | 893.0417        |
| 638.7760       | 6  | D  | 15 | 1687.9603      | 844.4841        |
| 695.8273       | 7  | G  | 14 | 1572.8729      | 786.9404        |
| 794.9584       | 8  | V  | 13 | 1515.8216      | 758.4148        |
| 923.0876       | 9  | Q  | 12 | 1416.6905      | 708.8492        |
| 1079.2733      | 10 | R  | 11 | 1288.5613      | 644.7846        |
| 1136.3246      | 11 | G  | 10 | 1132.3756      | 566.6918        |
| 1249.4822      | 12 | L  | 9  | 1075.3243      | 538.1661        |
| 1348.6133      | 13 | V  | 8  | 962.1667       | 481.5873        |
| 1405.6646      | 14 | G  | 7  | 863.0356       | 432.0218        |
| 1534.7786      | 15 | E  | 6  | 805.9843       | 403.4961        |
| 1647.9362      | 16 | I  | 5  | 676.8703       | 338.9391        |
| 1761.0939      | 17 | I  | 4  | 563.7127       | 282.3603        |
| 1889.2661      | 18 | K  | 3  | 450.5550       | 225.7815        |
| 2045.4518      | 19 | R  | 2  | 322.3828       | 161.6953        |
|                | 20 | F  | 1  | 166.1971       | 83.6025         |



# LFADKVPKTAENFR

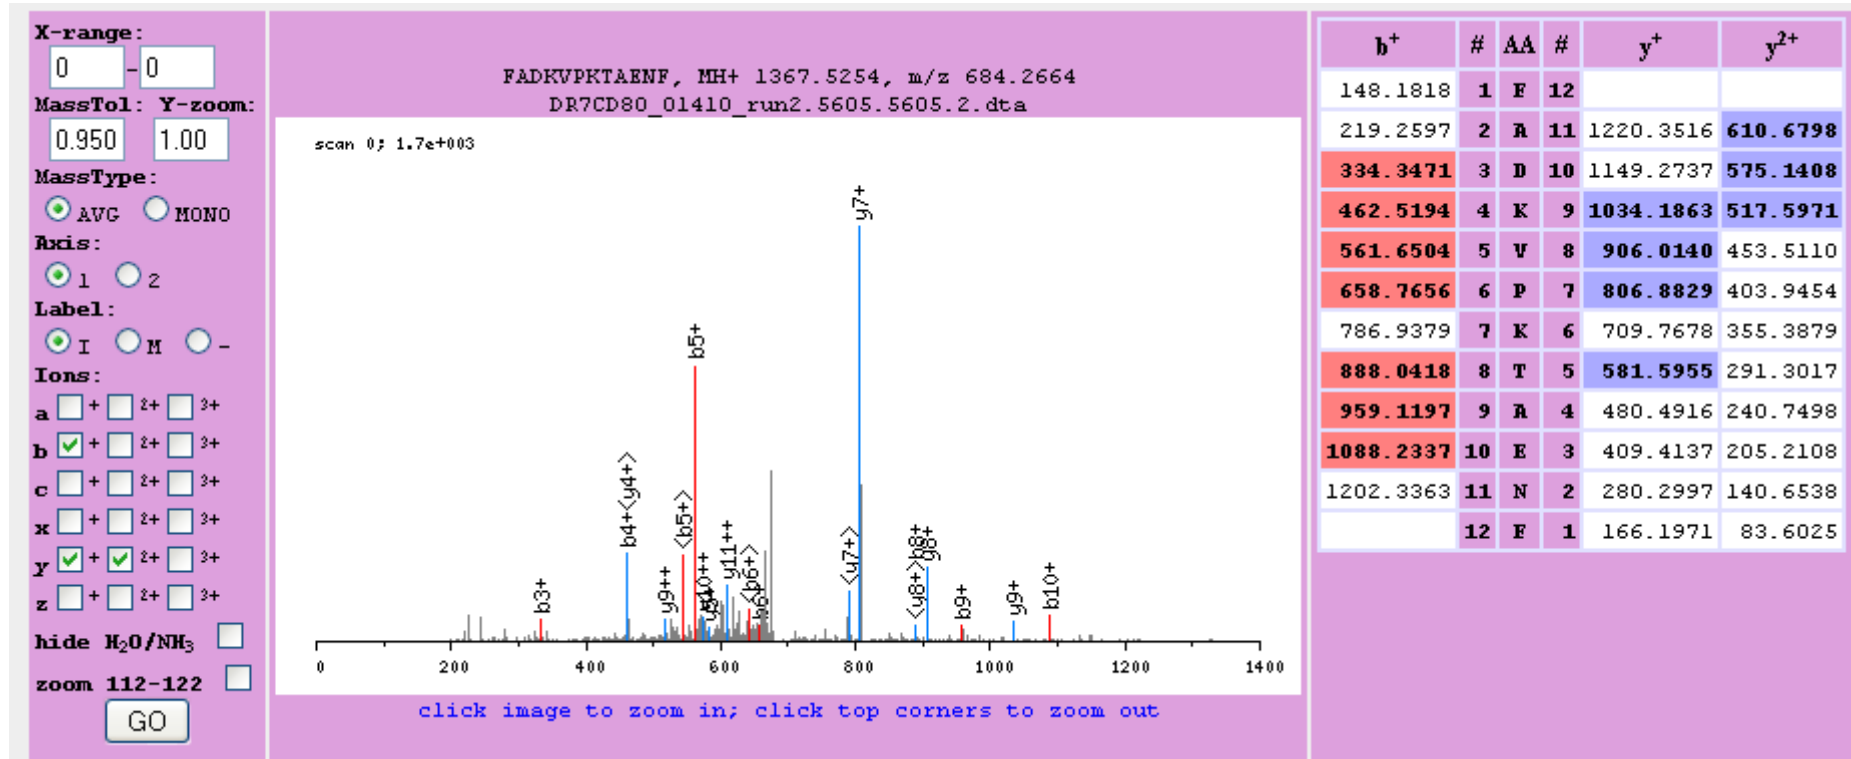

# MLFFLIMNFLEGKDASAFAAKMRG

**X-range:**  
 -   
**MassTol:** **Y-zoom:**  
   
**MassType:**  
 AVG  MONO  
**Axis:**  
 1  2  
**Label:**  
 I  M  -  
**Ions:**  
**a**  +  2+  3+  
**b**  +  2+  3+  
**c**  +  2+  3+  
**x**  +  2+  3+  
**y**  +  2+  3+  
**z**  +  2+  3+  
**hide H<sub>2</sub>O/NH<sub>3</sub>**   
**zoom 112-122**

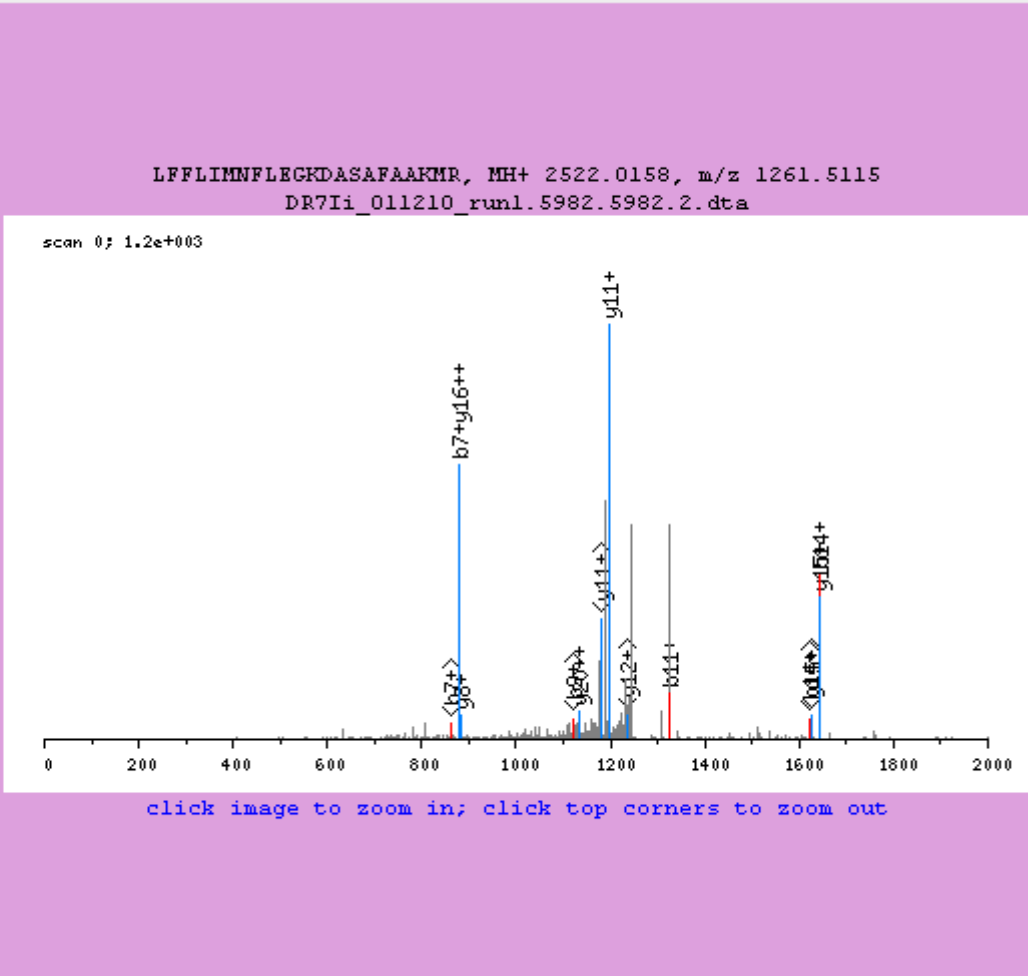

| b <sup>+</sup>   | #  | AA | #  | y <sup>+</sup>   | y <sup>2+</sup>  |
|------------------|----|----|----|------------------|------------------|
| 114.1656         | 1  | L  | 22 |                  |                  |
| 261.3394         | 2  | F  | 21 | 2408.8582        | 1204.9331        |
| 408.5133         | 3  | F  | 20 | 2261.6843        | <b>1131.3461</b> |
| 521.6709         | 4  | L  | 19 | 2114.5105        | 1057.7592        |
| 634.8286         | 5  | I  | 18 | 2001.3528        | 1001.1804        |
| 766.0246         | 6  | M  | 17 | 1888.1952        | 944.6016         |
| <b>880.1273</b>  | 7  | N  | 16 | 1756.9991        | <b>879.0035</b>  |
| 1027.3011        | 8  | F  | 15 | <b>1642.8965</b> | 821.9522         |
| 1140.4588        | 9  | L  | 14 | 1495.7226        | 748.3653         |
| 1269.5728        | 10 | E  | 13 | 1382.5650        | 691.7865         |
| <b>1326.6241</b> | 11 | G  | 12 | 1253.4510        | 627.2295         |
| 1454.7964        | 12 | K  | 11 | <b>1196.3997</b> | 598.7038         |
| 1569.8838        | 13 | D  | 10 | 1068.2274        | 534.6177         |
| <b>1640.9617</b> | 14 | R  | 9  | 953.1400         | 477.0740         |
| 1728.0390        | 15 | S  | 8  | <b>882.0621</b>  | 441.5350         |
| 1799.1169        | 16 | R  | 7  | 794.9848         | 397.9964         |
| 1946.2907        | 17 | F  | 6  | 723.9069         | 362.4574         |
| 2017.3686        | 18 | R  | 5  | 576.7330         | 288.8705         |
| 2088.4465        | 19 | R  | 4  | 505.6551         | 253.3315         |
| 2216.6188        | 20 | K  | 3  | 434.5772         | 217.7926         |
| 2347.8149        | 21 | M  | 2  | 306.4050         | 153.7065         |
|                  | 22 | R  | 1  | 175.2089         | 88.1084          |

# EEEGKGDASGNKVKAEPAKIEAF

X-range:  -

MassTol:  Y-zoom:

MassType:  
 AVG  MONO

Axis:  
 1  2

Label:  
 I  M  -

Ions:  
a  +  2+  3+  
b  +  2+  3+  
c  +  2+  3+  
x  +  2+  3+  
y  +  2+  3+  
z  +  2+  3+

hide H<sub>2</sub>O/NH<sub>3</sub>

zoom 112-122

EEEGKGDASGNKVKAEPAKIEA, MH+ 2257.4773, m/z 1129.2423  
 DR7Ii\_012110\_run1.4440.4440.2.dta

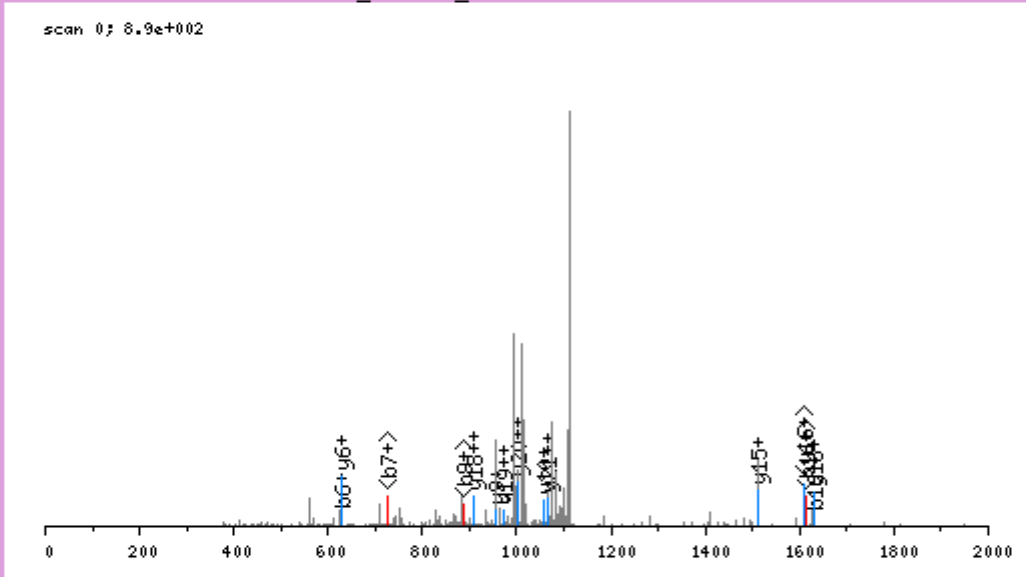

click image to zoom in; click top corners to zoom out

| b <sup>+</sup> | #  | AA | #  | y <sup>+</sup> | y <sup>2+</sup> |
|----------------|----|----|----|----------------|-----------------|
| 130.1219       | 1  | E  | 22 |                |                 |
| 259.2359       | 2  | E  | 21 | 2128.3633      | 1064.6856       |
| 316.2872       | 3  | G  | 20 | 1999.2494      | 1000.1286       |
| 444.4595       | 4  | K  | 19 | 1942.1980      | 971.6030        |
| 501.5108       | 5  | G  | 18 | 1814.0258      | 907.5168        |
| 629.6831       | 6  | K  | 17 | 1756.9744      | 878.9912        |
| 744.7705       | 7  | D  | 16 | 1628.8022      | 814.9050        |
| 815.8484       | 8  | R  | 15 | 1513.7148      | 757.3613        |
| 902.9257       | 9  | S  | 14 | 1442.6369      | 721.8224        |
| 959.9770       | 10 | G  | 13 | 1355.5596      | 678.2837        |
| 1074.0797      | 11 | N  | 12 | 1298.5082      | 649.7581        |
| 1202.2519      | 12 | K  | 11 | 1184.4056      | 592.7068        |
| 1301.3830      | 13 | V  | 10 | 1056.2333      | 528.6206        |
| 1429.5553      | 14 | K  | 9  | 957.1023       | 479.0551        |
| 1500.6332      | 15 | R  | 8  | 828.9300       | 414.9690        |
| 1629.7472      | 16 | E  | 7  | 757.8521       | 379.4300        |
| 1726.8623      | 17 | P  | 6  | 628.7381       | 314.8730        |
| 1797.9402      | 18 | R  | 5  | 531.6229       | 266.3154        |
| 1926.1125      | 19 | K  | 4  | 460.5450       | 230.7765        |
| 2039.2702      | 20 | I  | 3  | 332.3727       | 166.6903        |
| 2168.3841      | 21 | E  | 2  | 219.2151       | 110.1115        |
|                | 22 | R  | 1  | 90.1011        | 45.5545         |

# EDVIINGHSHEDDNPFAEY

**X-range:**  
 -

**MassTol:**  **Y-zoom:**

**MassType:**  
 AVG  MONO

**Axis:**  
 1  2

**Label:**  
 I  M  -

**Ions:**

a  +  2+  3+

b  +  2+  3+

c  +  2+  3+

x  +  2+  3+

Y  +  2+  3+

z  +  2+  3+

hide H<sub>2</sub>O/NH<sub>3</sub>

zoom 112-122

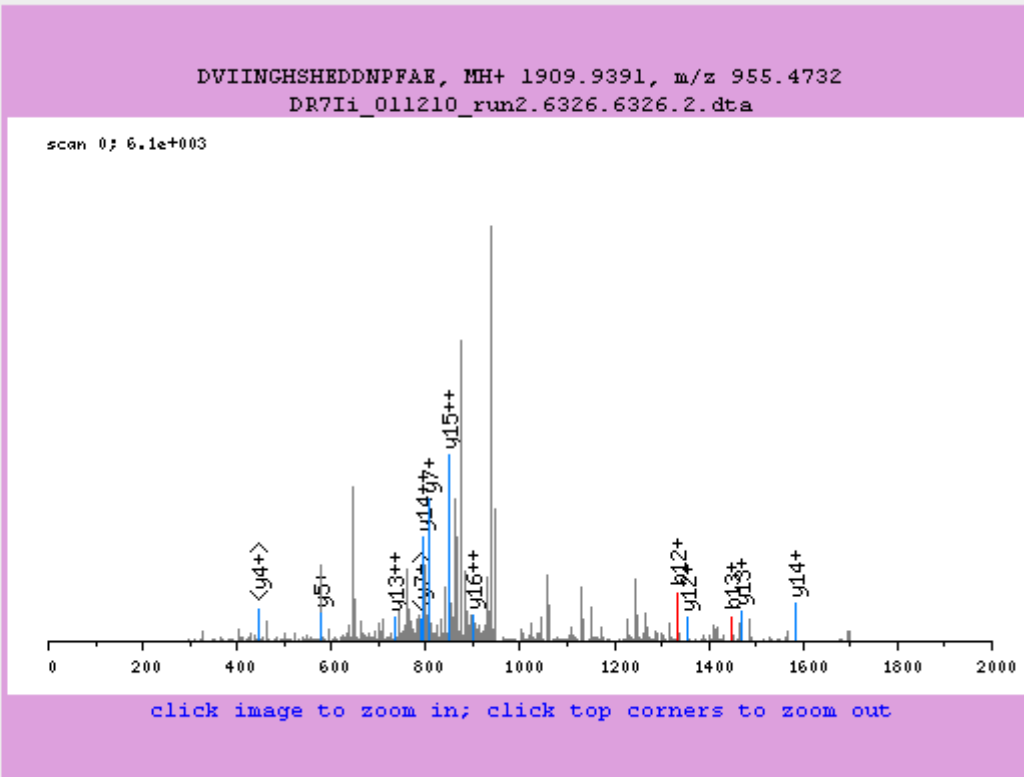

| b <sup>+</sup> | #  | AA | #  | y <sup>+</sup> | y <sup>2+</sup> |
|----------------|----|----|----|----------------|-----------------|
| 116.0953       | 1  | D  | 17 |                |                 |
| 215.2264       | 2  | V  | 16 | 1794.8517      | 897.9298        |
| 328.3840       | 3  | I  | 15 | 1695.7207      | 848.3643        |
| 441.5417       | 4  | I  | 14 | 1582.5630      | 791.7855        |
| 555.6443       | 5  | N  | 13 | 1469.4054      | 735.2067        |
| 612.6956       | 6  | G  | 12 | 1355.3027      | 678.1553        |
| 749.8349       | 7  | H  | 11 | 1298.2514      | 649.6297        |
| 836.9122       | 8  | S  | 10 | 1161.1121      | 581.0600        |
| 974.0515       | 9  | H  | 9  | 1074.0348      | 537.5214        |
| 1103.1655      | 10 | E  | 8  | 936.8956       | 468.9518        |
| 1218.2529      | 11 | D  | 7  | 807.7816       | 404.3948        |
| 1333.3403      | 12 | D  | 6  | 692.6942       | 346.8511        |
| 1447.4429      | 13 | N  | 5  | 577.6068       | 289.3074        |
| 1544.5581      | 14 | P  | 4  | 463.5041       | 232.2560        |
| 1691.7320      | 15 | F  | 3  | 366.3890       | 183.6985        |
| 1762.8099      | 16 | R  | 2  | 219.2151       | 110.1115        |
|                | 17 | E  | 1  | 148.1372       | 74.5726         |

# YIDENQDRYIKKLAKWV

**X-range:**  
 -

**MassTol: Y-zoom:**

**MassType:**  
 AVG  MONO

**Axis:**  
 1  2

**Label:**  
 I  M  -

**Ions:**

a  +  2+  3+

b  +  2+  3+

c  +  2+  3+

x  +  2+  3+

y  +  2+  3+

z  +  2+  3+

hide H<sub>2</sub>O/NH<sub>3</sub>

zoom 112-122

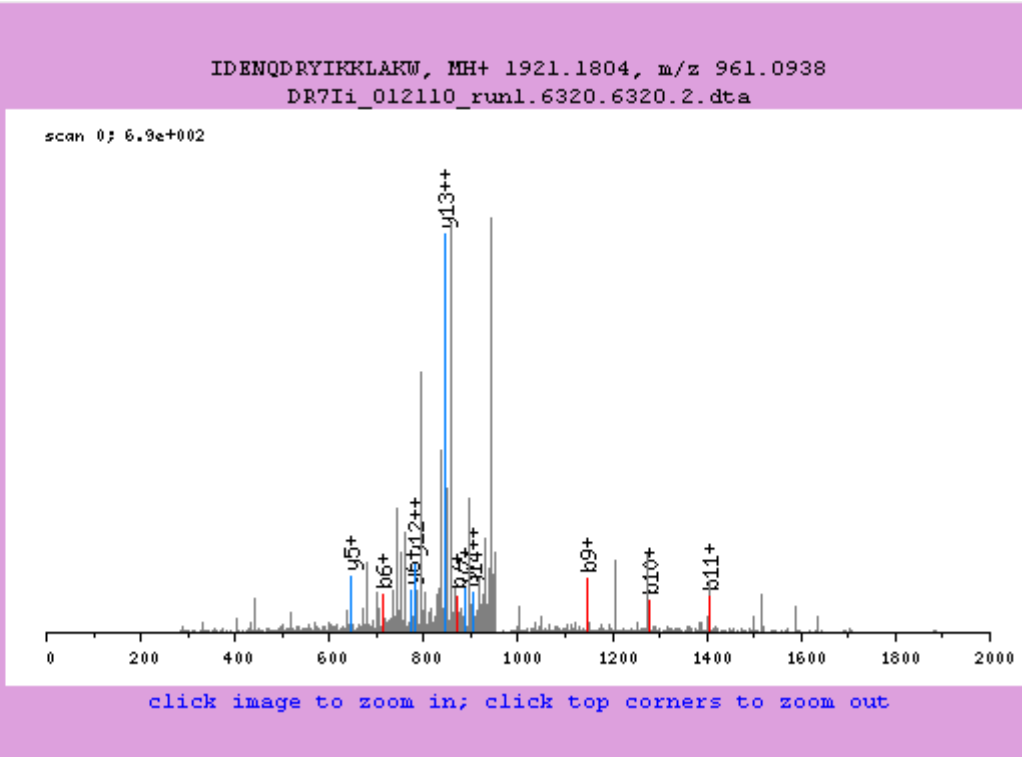

| b <sup>+</sup> | #  | AA | #  | y <sup>+</sup> | y <sup>2+</sup> |
|----------------|----|----|----|----------------|-----------------|
| 114.1656       | 1  | I  | 15 |                |                 |
| 229.2530       | 2  | D  | 14 | 1808.0227      | 904.5153        |
| 358.3670       | 3  | E  | 13 | 1692.9353      | 846.9716        |
| 472.4696       | 4  | N  | 12 | 1563.8213      | 782.4146        |
| 600.5988       | 5  | Q  | 11 | 1449.7187      | 725.3633        |
| 715.6862       | 6  | D  | 10 | 1321.5895      | 661.2987        |
| 871.8719       | 7  | R  | 9  | 1206.5021      | 603.7550        |
| 1035.0452      | 8  | Y  | 8  | 1050.3164      | 525.6622        |
| 1148.2028      | 9  | I  | 7  | 887.1431       | 444.0755        |
| 1276.3751      | 10 | K  | 6  | 773.9855       | 387.4967        |
| 1404.5474      | 11 | K  | 5  | 645.8132       | 323.4106        |
| 1517.7050      | 12 | L  | 4  | 517.6409       | 259.3244        |
| 1588.7829      | 13 | R  | 3  | 404.4833       | 202.7456        |
| 1716.9552      | 14 | K  | 2  | 333.4054       | 167.2067        |
|                | 15 | W  | 1  | 205.2331       | 103.1205        |

# LRTKSTGGAPTFNVTVTKTDKTLV

**X-range:**  
 -   
**MassTol:**  **Y-zoom:**   
**MassType:**  
 AVG  MONO  
**Axis:**  
 1  2  
**Label:**  
 I  M  -  
**Ions:**  
a  +  2+  3+  
b  +  2+  3+  
c  +  2+  3+  
x  +  2+  3+  
y  +  2+  3+  
z  +  2+  3+  
hide H<sub>2</sub>O/NH<sub>3</sub>   
zoom 112-122

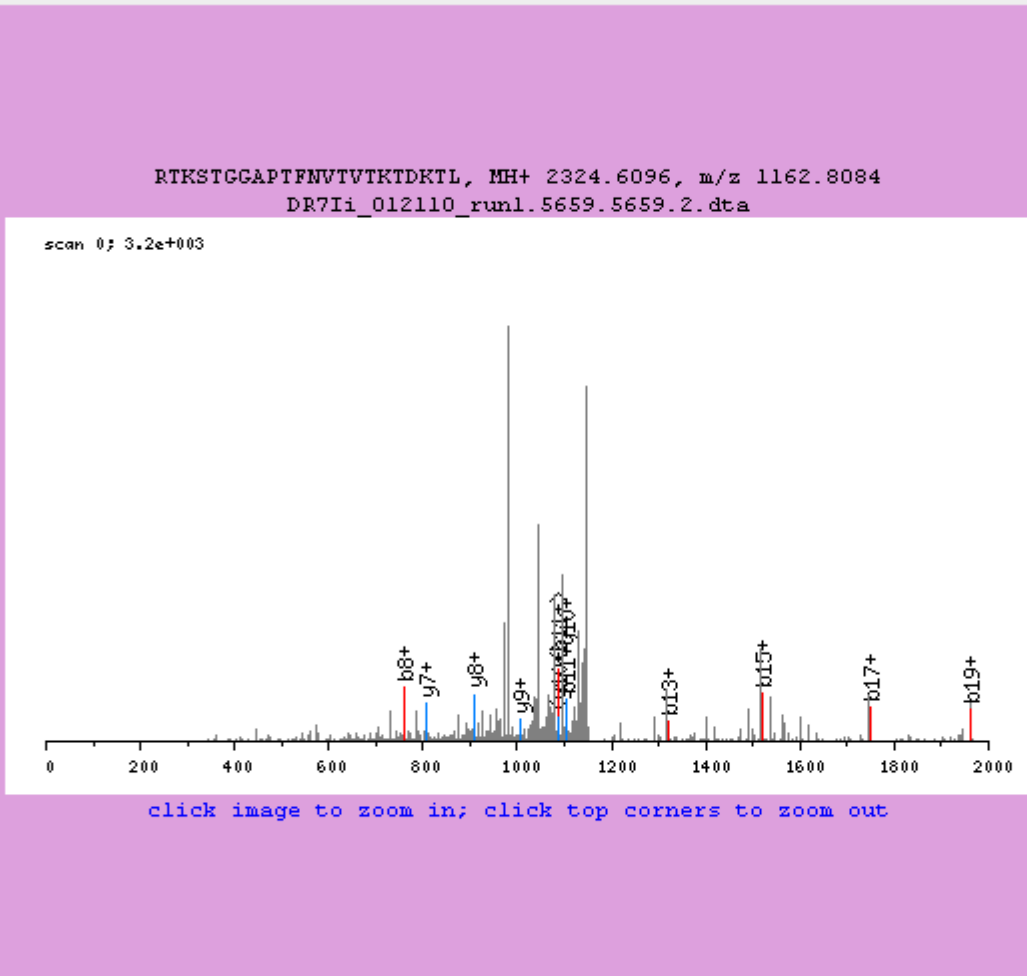

| b <sup>+</sup> | #  | AA | #  | y <sup>+</sup> | y <sup>2+</sup> |
|----------------|----|----|----|----------------|-----------------|
| 157.1936       | 1  | R  | 22 |                |                 |
| 258.2975       | 2  | T  | 21 | 2168.4239      | 1084.7159       |
| 386.4698       | 3  | K  | 20 | 2067.3200      | 1034.1640       |
| 473.5471       | 4  | S  | 19 | 1939.1477      | 970.0778        |
| 574.6510       | 5  | T  | 18 | 1852.0704      | 926.5392        |
| 631.7023       | 6  | G  | 17 | 1750.9666      | 875.9872        |
| 688.7536       | 7  | G  | 16 | 1693.9152      | 847.4616        |
| 759.8315       | 8  | R  | 15 | 1636.8639      | 818.9359        |
| 856.9467       | 9  | P  | 14 | 1565.7860      | 783.3970        |
| 958.0506       | 10 | T  | 13 | 1468.6708      | 734.8394        |
| 1105.2244      | 11 | F  | 12 | 1367.5670      | 684.2874        |
| 1219.3271      | 12 | N  | 11 | 1220.3931      | 610.7005        |
| 1318.4581      | 13 | V  | 10 | 1106.2905      | 553.6492        |
| 1419.5620      | 14 | T  | 9  | 1007.1594      | 504.0837        |
| 1518.6931      | 15 | V  | 8  | 906.0555       | 453.5317        |
| 1619.7969      | 16 | T  | 7  | 806.9245       | 403.9662        |
| 1747.9692      | 17 | K  | 6  | 705.8206       | 353.4143        |
| 1849.0731      | 18 | T  | 5  | 577.6483       | 289.3281        |
| 1964.1605      | 19 | D  | 4  | 476.5444       | 238.7762        |
| 2092.3328      | 20 | K  | 3  | 361.4570       | 181.2325        |
| 2193.4367      | 21 | T  | 2  | 233.2847       | 117.1463        |
|                | 22 | L  | 1  | 132.1809       | 66.5944         |

# LEKIVNPKGEEKPSM

**X-range:**  
 -

**MassTol:** **Y-zoom:**

**MassType:**  
 AVG  MONO

**Axis:**  
 1  2

**Label:**  
 I  M  -

**Ions:**

a  +  2+  3+

b  +  2+  3+

c  +  2+  3+

x  +  2+  3+

Y  +  2+  3+

z  +  2+  3+

**hide H<sub>2</sub>O/NH<sub>3</sub>**

**zoom 112-122**

EKIVNPKGEEKPS, MH+ 1455.6323, m/z 728.3198  
 DR7Ii\_011210\_run1.4477.4477.2.dta

scan 0; 4.6e+002

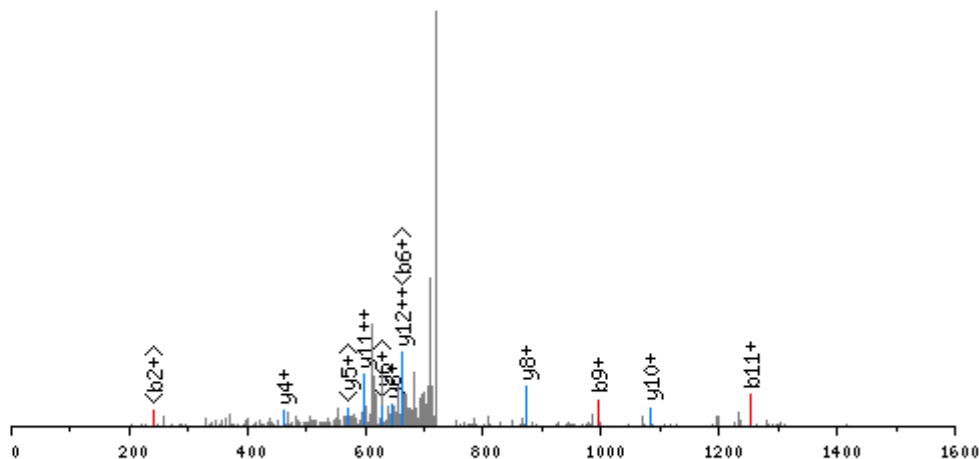

click image to zoom in; click top corners to zoom out

| b <sup>+</sup> | #  | AA | #  | y <sup>+</sup> | y <sup>2+</sup> |
|----------------|----|----|----|----------------|-----------------|
| 130.1219       | 1  | E  | 13 |                |                 |
| 258.2942       | 2  | K  | 12 | 1326.5183      | 663.7631        |
| 371.4518       | 3  | I  | 11 | 1198.3461      | 599.6770        |
| 470.5829       | 4  | V  | 10 | 1085.1884      | 543.0982        |
| 584.6855       | 5  | N  | 9  | 986.0574       | 493.5326        |
| 681.8007       | 6  | P  | 8  | 871.9547       | 436.4813        |
| 809.9730       | 7  | K  | 7  | 774.8395       | 387.9237        |
| 867.0243       | 8  | G  | 6  | 646.6673       | 323.8376        |
| 996.1383       | 9  | E  | 5  | 589.6159       | 295.3119        |
| 1125.2523      | 10 | E  | 4  | 460.5020       | 230.7549        |
| 1253.4246      | 11 | K  | 3  | 331.3880       | 166.1980        |
| 1350.5397      | 12 | P  | 2  | 203.2157       | 102.1118        |
|                | 13 | S  | 1  | 106.1005       | 53.5542         |

# LIGGITGPIAKLIHEQQSSS

X-range:  -

MassTol:  Y-zoom:

MassType:  
 AVG  MONO

Axis:  
 1  2

Label:  
 I  M  -

Ions:  
a  +  2+  3+  
b  +  2+  3+  
c  +  2+  3+  
x  +  2+  3+  
y  +  2+  3+  
z  +  2+  3+

hide H<sub>2</sub>O/NH<sub>3</sub>

zoom 112-122

IGGITGPIAKLIHEQQSSS, MH+ 2194.4214, m/z 1097.7143  
 DR7Ii\_011210\_run1.7572.7572.2.dta

scan 0; 6.8e+002

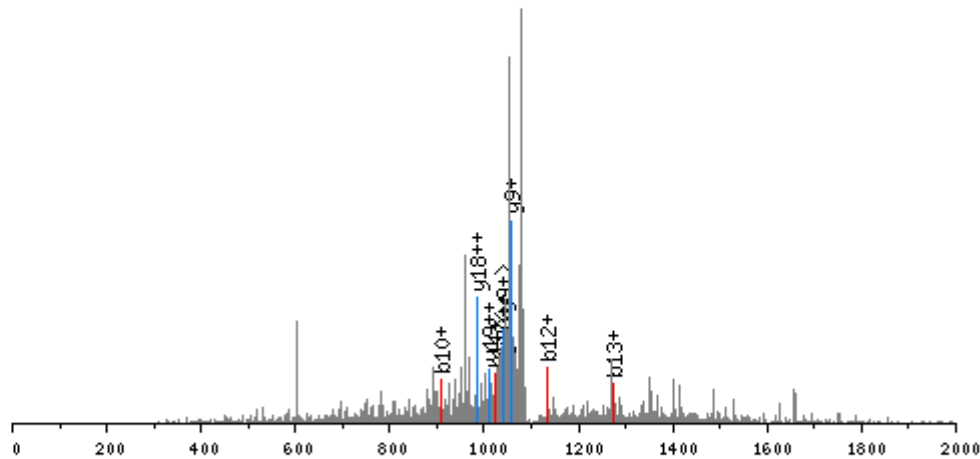

click image to zoom in; click top corners to zoom out

| b <sup>+</sup> | #  | AA | #  | y <sup>+</sup> | y <sup>2+</sup> |
|----------------|----|----|----|----------------|-----------------|
| 114.1656       | 1  | I  | 21 |                |                 |
| 171.2169       | 2  | G  | 20 | 2081.2638      | 1041.1359       |
| 228.2682       | 3  | G  | 19 | 2024.2125      | 1012.6102       |
| 341.4259       | 4  | I  | 18 | 1967.1611      | 984.0845        |
| 442.5297       | 5  | T  | 17 | 1854.0035      | 927.5057        |
| 499.5811       | 6  | G  | 16 | 1752.8996      | 876.9538        |
| 596.6962       | 7  | P  | 15 | 1695.8483      | 848.4281        |
| 709.8539       | 8  | I  | 14 | 1598.7331      | 799.8705        |
| 780.9318       | 9  | R  | 13 | 1485.5755      | 743.2917        |
| 909.1041       | 10 | K  | 12 | 1414.4976      | 707.7528        |
| 1022.2617      | 11 | L  | 11 | 1286.3253      | 643.6666        |
| 1135.4193      | 12 | I  | 10 | 1173.1677      | 587.0878        |
| 1272.5586      | 13 | H  | 9  | 1060.0100      | 530.5090        |
| 1401.6726      | 14 | E  | 8  | 922.8707       | 461.9393        |
| 1529.8018      | 15 | Q  | 7  | 793.7568       | 397.3824        |
| 1658.9158      | 16 | E  | 6  | 665.6275       | 333.3177        |
| 1787.0450      | 17 | Q  | 5  | 536.5136       | 268.7608        |
| 1915.1742      | 18 | Q  | 4  | 408.3843       | 204.6961        |
| 2002.2515      | 19 | S  | 3  | 280.2551       | 140.6315        |
| 2089.3288      | 20 | S  | 2  | 193.1778       | 97.0929         |
|                | 21 | S  | 1  | 106.1005       | 53.5542         |



# FSRYSGSEGSTQTLTKGELKVL

X-range:

0 - 0

MassTol: Y-zoom:

0.950 1.00

MassType:

AVG  MONO

Axis:

1  2

Label:

I  M  -

Ions:

a  +  2+  3+

b  +  2+  3+

c  +  2+  3+

x  +  2+  3+

y  +  2+  3+

z  +  2+  3+

hide H<sub>2</sub>O/NH<sub>3</sub>

zoom 112-122

GO

FSRYSGSEGSTQTLTKGELKVL, MH+ 2242.4627, m/z 1121.7350  
DR7Ii\_011210\_run1.6331.6331.2.dta

scan 0; 1.7e+003

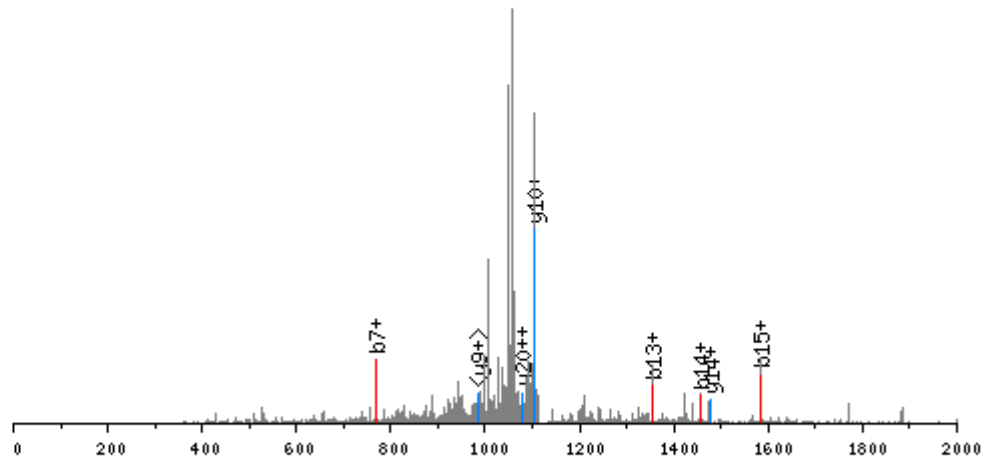

click image to zoom in; click top corners to zoom out

| b <sup>+</sup> | #  | AA | #  | y <sup>+</sup> | y <sup>2+</sup> |
|----------------|----|----|----|----------------|-----------------|
| 88.0852        | 1  | S  | 21 |                |                 |
| 244.2709       | 2  | R  | 20 | 2155.3854      | 1078.1967       |
| 407.4442       | 3  | Y  | 19 | 1999.1997      | 1000.1038       |
| 494.5215       | 4  | S  | 18 | 1836.0264      | 918.5172        |
| 551.5728       | 5  | G  | 17 | 1748.9491      | 874.9785        |
| 638.6501       | 6  | S  | 16 | 1691.8978      | 846.4529        |
| 767.7641       | 7  | E  | 15 | 1604.8205      | 802.9142        |
| 824.8154       | 8  | G  | 14 | 1475.7065      | 738.3572        |
| 911.8927       | 9  | S  | 13 | 1418.6552      | 709.8316        |
| 1012.9966      | 10 | T  | 12 | 1331.5779      | 666.2929        |
| 1141.1258      | 11 | Q  | 11 | 1230.4740      | 615.7410        |
| 1242.2297      | 12 | T  | 10 | 1102.3448      | 551.6764        |
| 1355.3873      | 13 | L  | 9  | 1001.2409      | 501.1244        |
| 1456.4912      | 14 | T  | 8  | 888.0833       | 444.5456        |
| 1584.6635      | 15 | K  | 7  | 786.9794       | 393.9937        |
| 1641.7148      | 16 | G  | 6  | 658.8071       | 329.9075        |
| 1770.8288      | 17 | E  | 5  | 601.7558       | 301.3819        |
| 1883.9864      | 18 | L  | 4  | 472.6418       | 236.8249        |
| 2012.1587      | 19 | K  | 3  | 359.4842       | 180.2461        |
| 2111.2898      | 20 | V  | 2  | 231.3119       | 116.1599        |
|                | 21 | L  | 1  | 132.1809       | 66.5944         |

# KAVVSTSDKKMPNGILEEQEQQRSRIPAHWR

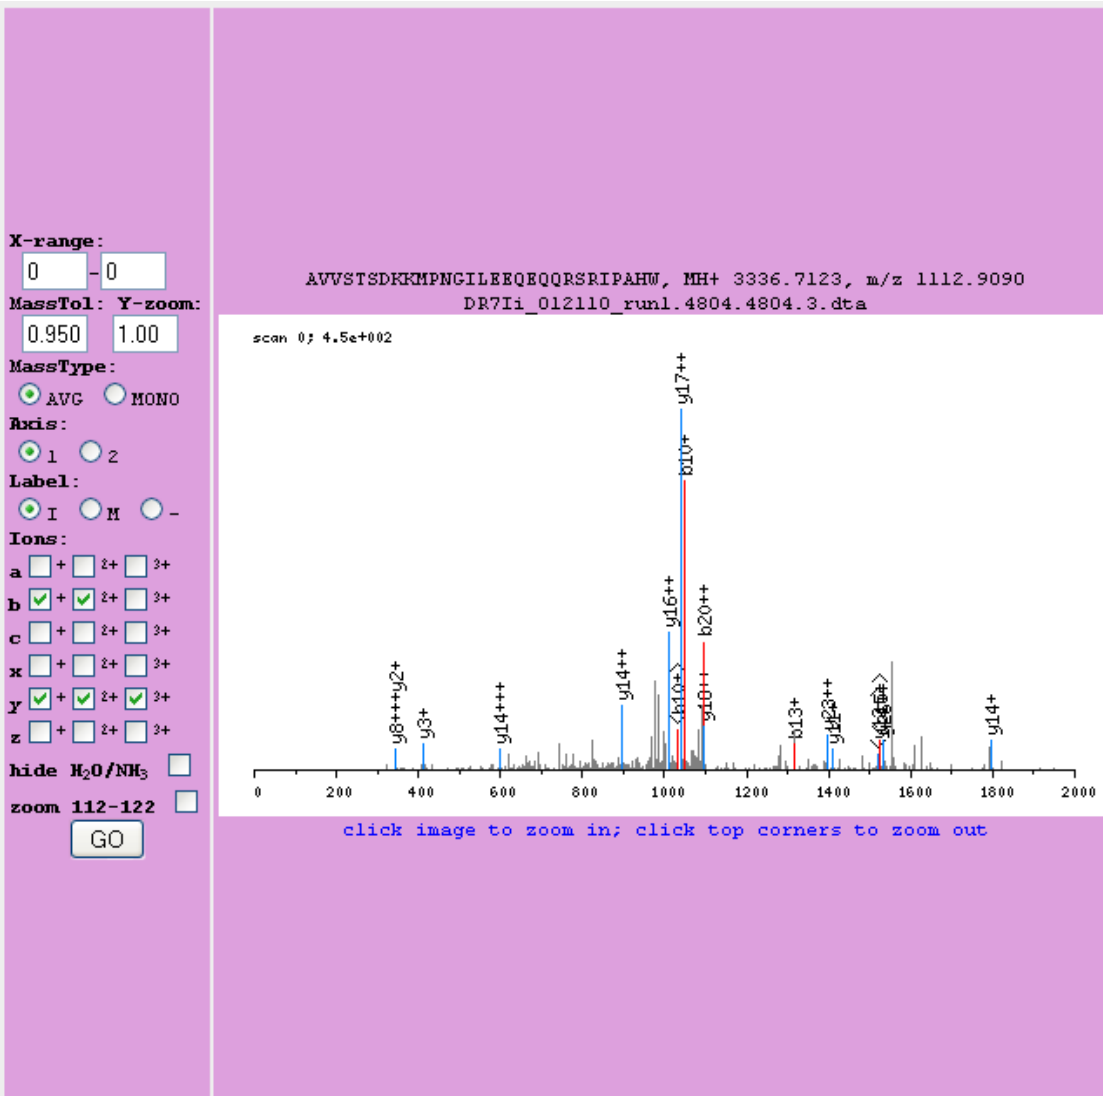

| b <sup>+</sup> | b <sup>2+</sup> | #  | AA | #  | y <sup>+</sup> | y <sup>2+</sup> | y <sup>3+</sup> |
|----------------|-----------------|----|----|----|----------------|-----------------|-----------------|
| 72.0858        | 36.5469         | 1  | R  | 29 |                |                 |                 |
| 171.2169       | 86.1124         | 2  | V  | 28 | 3265.6344      | 1633.3212       | 1089.2168       |
| 270.3480       | 135.6780        | 3  | V  | 27 | 3166.5034      | 1583.7556       | 1056.1731       |
| 357.4253       | 179.2166        | 4  | S  | 26 | 3067.3723      | 1534.1901       | 1023.1294       |
| 458.5291       | 229.7685        | 5  | T  | 25 | 2980.2950      | 1490.6515       | 994.1036        |
| 545.6064       | 273.3072        | 6  | S  | 24 | 2879.1911      | 1440.0995       | 960.4023        |
| 660.6938       | 330.8509        | 7  | D  | 23 | 2792.1138      | 1396.5609       | 931.3766        |
| 788.8661       | 394.9370        | 8  | K  | 22 | 2677.0264      | 1339.0172       | 893.0141        |
| 917.0384       | 459.0232        | 9  | K  | 21 | 2548.8541      | 1274.9310       | 850.2900        |
| 1048.2345      | 524.6212        | 10 | M  | 20 | 2420.6819      | 1210.8449       | 807.5659        |
| 1145.3496      | 573.1788        | 11 | P  | 19 | 2289.4858      | 1145.2469       | 763.8339        |
| 1259.4523      | 630.2301        | 12 | N  | 18 | 2192.3706      | 1096.6893       | 731.4622        |
| 1316.5036      | 658.7558        | 13 | G  | 17 | 2078.2680      | 1039.6380       | 693.4280        |
| 1429.6612      | 715.3346        | 14 | I  | 16 | 2021.2167      | 1011.1123       | 674.4108        |
| 1542.8189      | 771.9134        | 15 | L  | 15 | 1908.0590      | 954.5335        | 636.6916        |
| 1671.9329      | 836.4704        | 16 | E  | 14 | 1794.9014      | 897.9547        | 598.9724        |
| 1801.0468      | 901.0274        | 17 | E  | 13 | 1665.7874      | 833.3977        | 555.9344        |
| 1929.1761      | 965.0920        | 18 | Q  | 12 | 1536.6734      | 768.8407        | 512.8964        |
| 2058.2900      | 1029.6490       | 19 | E  | 11 | 1408.5442      | 704.7761        | 470.1867        |
| 2186.4193      | 1093.7136       | 20 | Q  | 10 | 1279.4302      | 640.2191        | 427.1487        |
| 2314.5485      | 1157.7782       | 21 | Q  | 9  | 1151.3010      | 576.1545        | 384.4390        |
| 2470.7342      | 1235.8711       | 22 | R  | 8  | 1023.1718      | 512.0899        | 341.7292        |
| 2557.8115      | 1279.4097       | 23 | S  | 7  | 866.9861       | 433.9970        | 289.6673        |
| 2713.9971      | 1357.5025       | 24 | R  | 6  | 779.9088       | 390.4584        | 260.6416        |
| 2827.1548      | 1414.0814       | 25 | I  | 5  | 623.7231       | 312.3655        | 208.5797        |
| 2924.2700      | 1462.6389       | 26 | P  | 4  | 510.5655       | 255.7867        | 170.8605        |
| 2995.3479      | 1498.1779       | 27 | R  | 3  | 413.4503       | 207.2291        | 138.4887        |
| 3132.4871      | 1566.7475       | 28 | H  | 2  | 342.3724       | 171.6902        | 114.7961        |
|                |                 | 29 | W  | 1  | 205.2331       | 103.1205        | 69.0830         |

# PPCVGGVPG

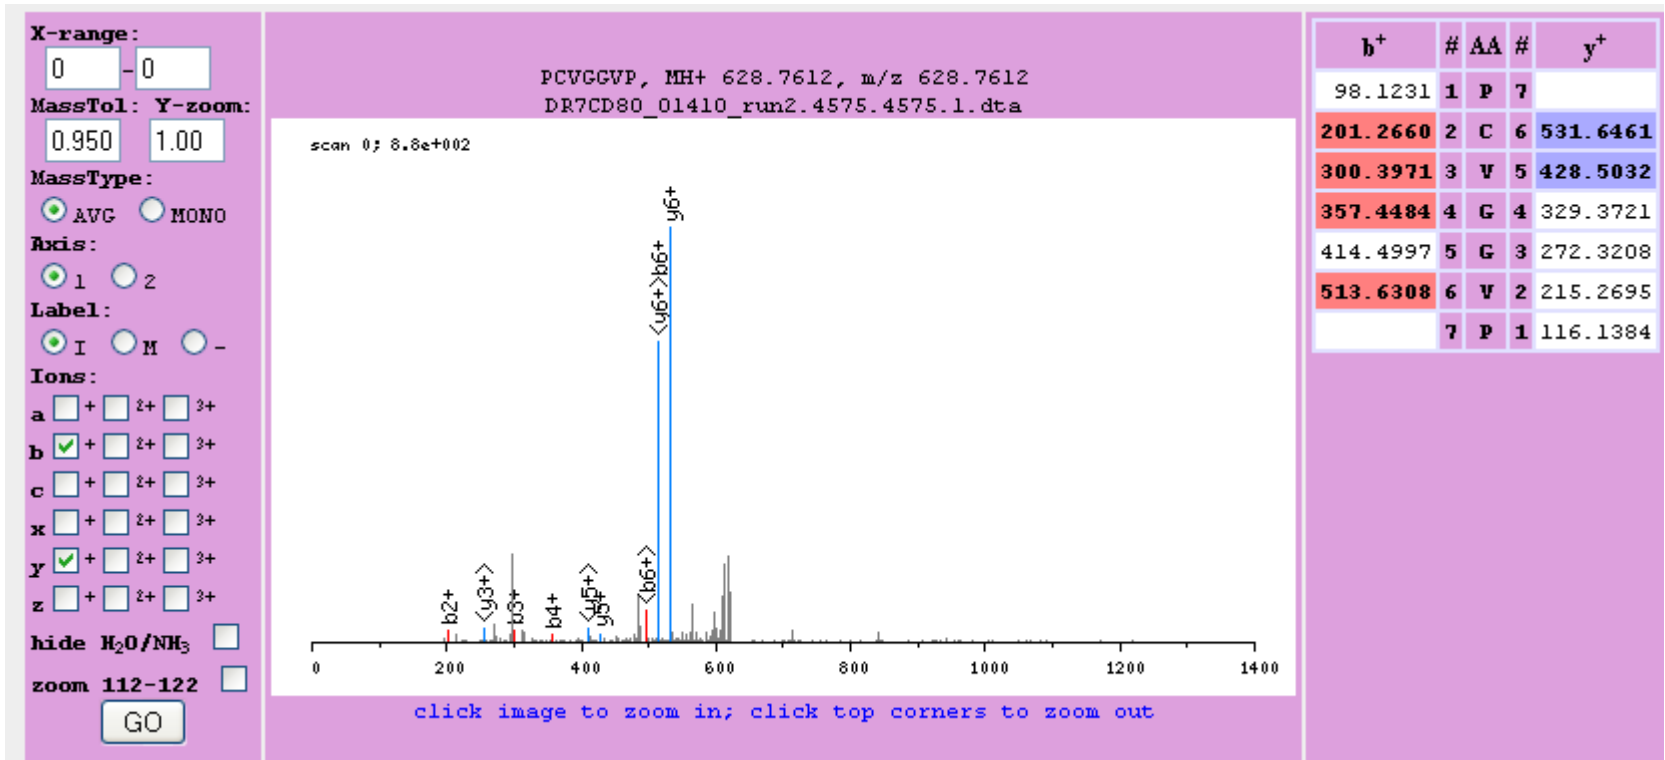

# HMMKKLDLTSDGQLDF

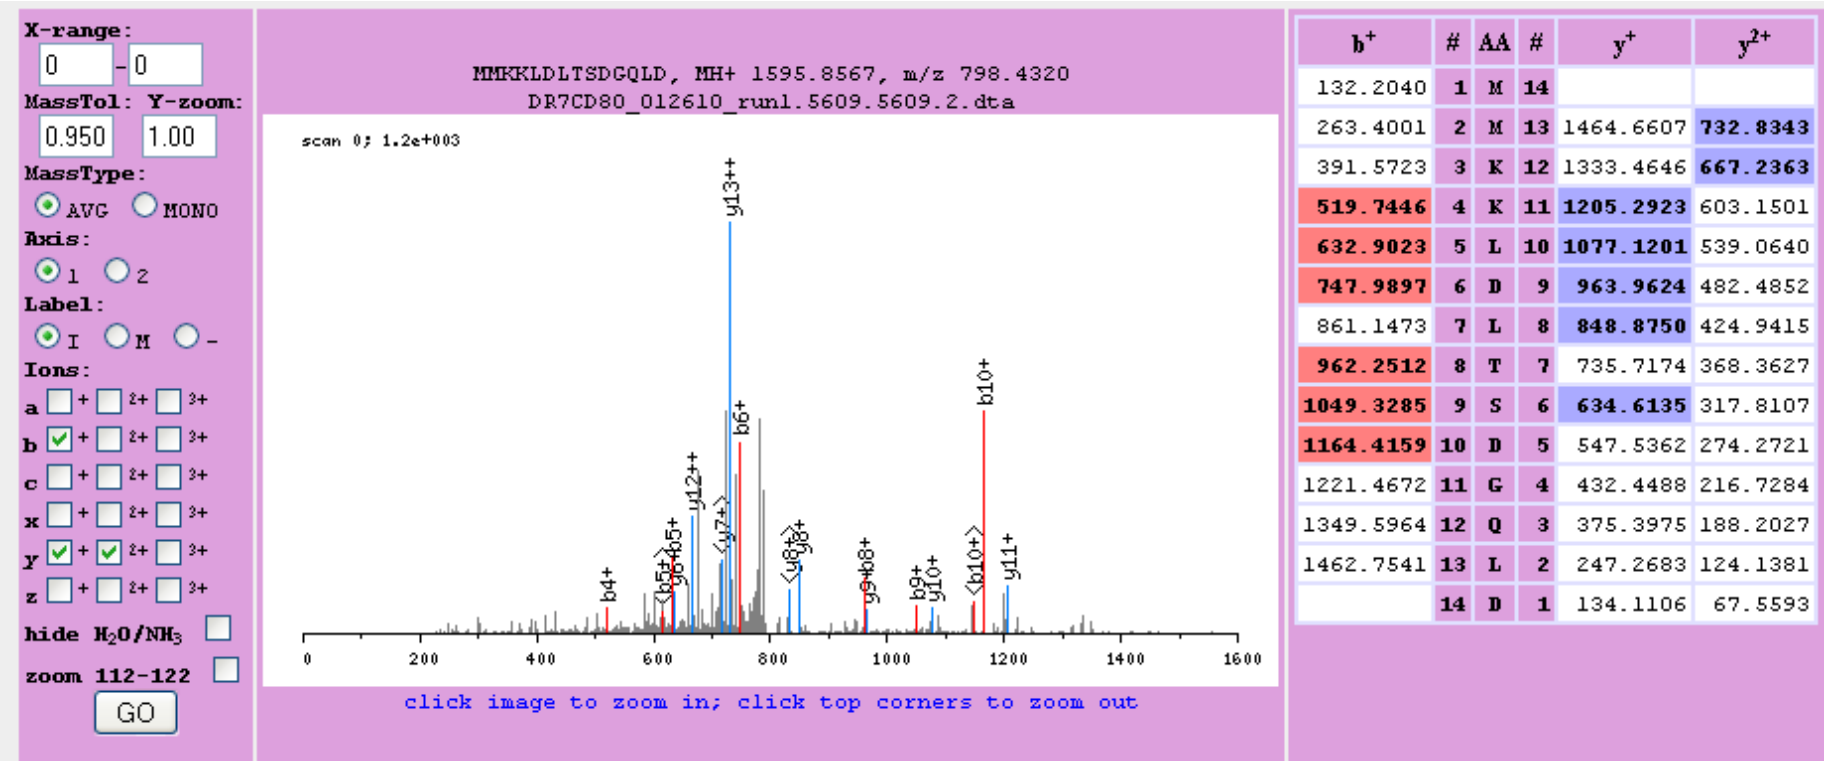

# DAEQRGELAIKDANAKLSELE

X-range:

0 - 0

MassTol: Y-zoom:

0.950 1.00

MassType:

AVG  MONO

Axis:

1  2

Label:

I  M  -

Ions:

a  +  2+  3+

b  +  2+  3+

c  +  2+  3+

x  +  2+  3+

y  +  2+  3+

z  +  2+  3+

hide H<sub>2</sub>O/NH<sub>3</sub>

zoom 112-122

GO

AEQRGELAIKDANAKLSEL, MH+ 2057.2854, m/z 1029.1464  
DR7Ii\_012110\_run1.6356.6356.2.dta

scan 0; 1.0e+003

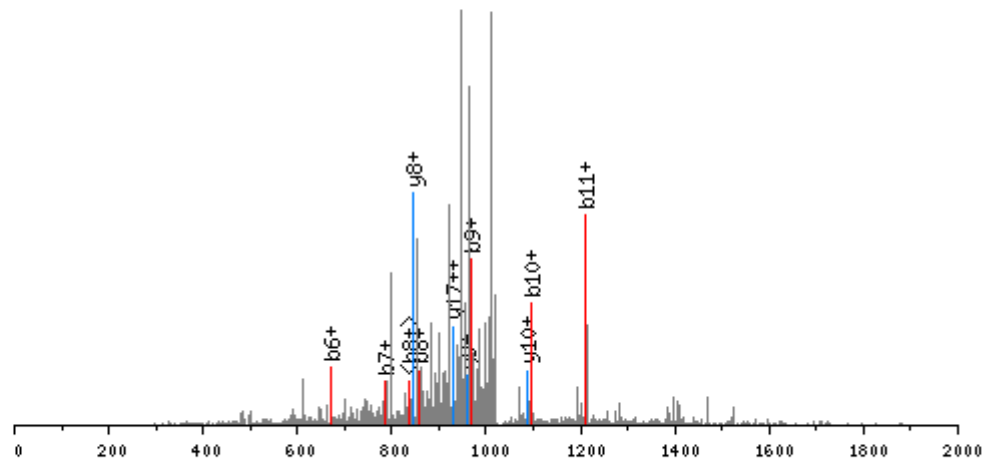

click image to zoom in; click top corners to zoom out

| b <sup>+</sup>   | #  | AA | #  | y <sup>+</sup>   | y <sup>2+</sup> |
|------------------|----|----|----|------------------|-----------------|
| 72.0858          | 1  | R  | 19 |                  |                 |
| 201.1998         | 2  | E  | 18 | 1986.2075        | 993.6077        |
| 329.3290         | 3  | Q  | 17 | 1857.0936        | <b>929.0507</b> |
| 485.5147         | 4  | R  | 16 | 1728.9643        | 864.9861        |
| 542.5660         | 5  | G  | 15 | 1572.7787        | 786.8933        |
| <b>671.6800</b>  | 6  | E  | 14 | 1515.7273        | 758.3676        |
| <b>784.8377</b>  | 7  | L  | 13 | 1386.6134        | 693.8106        |
| <b>855.9156</b>  | 8  | R  | 12 | 1273.4557        | 637.2318        |
| <b>969.0732</b>  | 9  | I  | 11 | 1202.3778        | 601.6929        |
| <b>1097.2455</b> | 10 | K  | 10 | <b>1089.2202</b> | 545.1141        |
| <b>1212.3329</b> | 11 | D  | 9  | <b>961.0479</b>  | 481.0279        |
| 1283.4108        | 12 | R  | 8  | <b>845.9605</b>  | 423.4842        |
| 1397.5134        | 13 | N  | 7  | 774.8826         | 387.9453        |
| 1468.5913        | 14 | R  | 6  | 660.7800         | 330.8940        |
| 1596.7636        | 15 | K  | 5  | 589.7021         | 295.3550        |
| 1709.9212        | 16 | L  | 4  | 461.5298         | 231.2689        |
| 1796.9985        | 17 | S  | 3  | 348.3721         | 174.6900        |
| 1926.1125        | 18 | E  | 2  | 261.2948         | 131.1514        |
|                  | 19 | L  | 1  | 132.1809         | 66.5944         |

# FILKHTGPGILSMANAGPNTNGSQFF

X-range:  -

MassTo1:  Y-zoom:

MassType:  
 AVG  MONO

Axis:  
 1  2

Label:  
 I  M  -

Ions:  
a  +  2+  3+  
b  +  2+  3+  
c  +  2+  3+  
x  +  2+  3+  
y  +  2+  3+  
z  +  2+  3+

hide H<sub>2</sub>O/NH<sub>3</sub>

zoom 112-122

ILKHTGPGILSMANAGPNTNGSQF, MH+ 2426.7262, m/z 1213.8667  
 DR7Ii\_011210\_run1.6911.6911.2.dta

scan 0; 1.2e+003

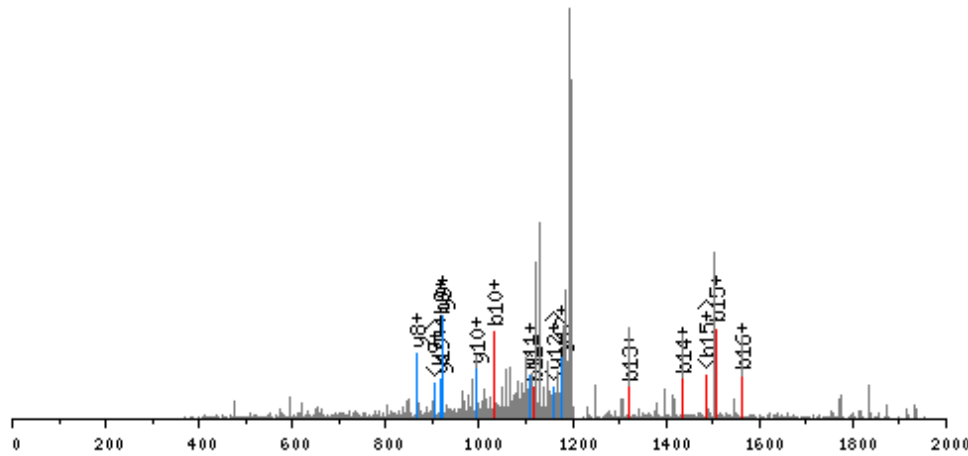

click image to zoom in; click top corners to zoom out

| b <sup>+</sup> | #  | AA | #  | y <sup>+</sup> | y <sup>2+</sup> |
|----------------|----|----|----|----------------|-----------------|
| 114.1656       | 1  | I  | 24 |                |                 |
| 227.3232       | 2  | L  | 23 | 2313.5686      | 1157.2883       |
| 355.4955       | 3  | K  | 22 | 2200.4109      | 1100.7094       |
| 492.6348       | 4  | H  | 21 | 2072.2386      | 1036.6233       |
| 593.7387       | 5  | T  | 20 | 1935.0994      | 968.0537        |
| 650.7900       | 6  | G  | 19 | 1833.9955      | 917.5017        |
| 747.9052       | 7  | P  | 18 | 1776.9442      | 888.9761        |
| 804.9565       | 8  | G  | 17 | 1679.8290      | 840.4185        |
| 918.1141       | 9  | I  | 16 | 1622.7777      | 811.8928        |
| 1031.2718      | 10 | L  | 15 | 1509.6200      | 755.3140        |
| 1118.3491      | 11 | S  | 14 | 1396.4624      | 698.7352        |
| 1249.5451      | 12 | M  | 13 | 1309.3851      | 655.1965        |
| 1320.6230      | 13 | A  | 12 | 1178.1890      | 589.5985        |
| 1434.7257      | 14 | N  | 11 | 1107.1111      | 554.0595        |
| 1505.8036      | 15 | A  | 10 | 993.0085       | 497.0082        |
| 1562.8549      | 16 | G  | 9  | 921.9306       | 461.4693        |
| 1659.9701      | 17 | P  | 8  | 864.8793       | 432.9436        |
| 1774.0727      | 18 | N  | 7  | 767.7641       | 384.3860        |
| 1875.1766      | 19 | T  | 6  | 653.6614       | 327.3347        |
| 1989.2792      | 20 | N  | 5  | 552.5576       | 276.7828        |
| 2046.3305      | 21 | G  | 4  | 438.4549       | 219.7314        |
| 2133.4078      | 22 | S  | 3  | 381.4036       | 191.2058        |
| 2261.5371      | 23 | Q  | 2  | 294.3263       | 147.6671        |
|                | 24 | F  | 1  | 166.1971       | 83.6025         |

# QSNPSPQLRSVMKVESSENVPSPKH

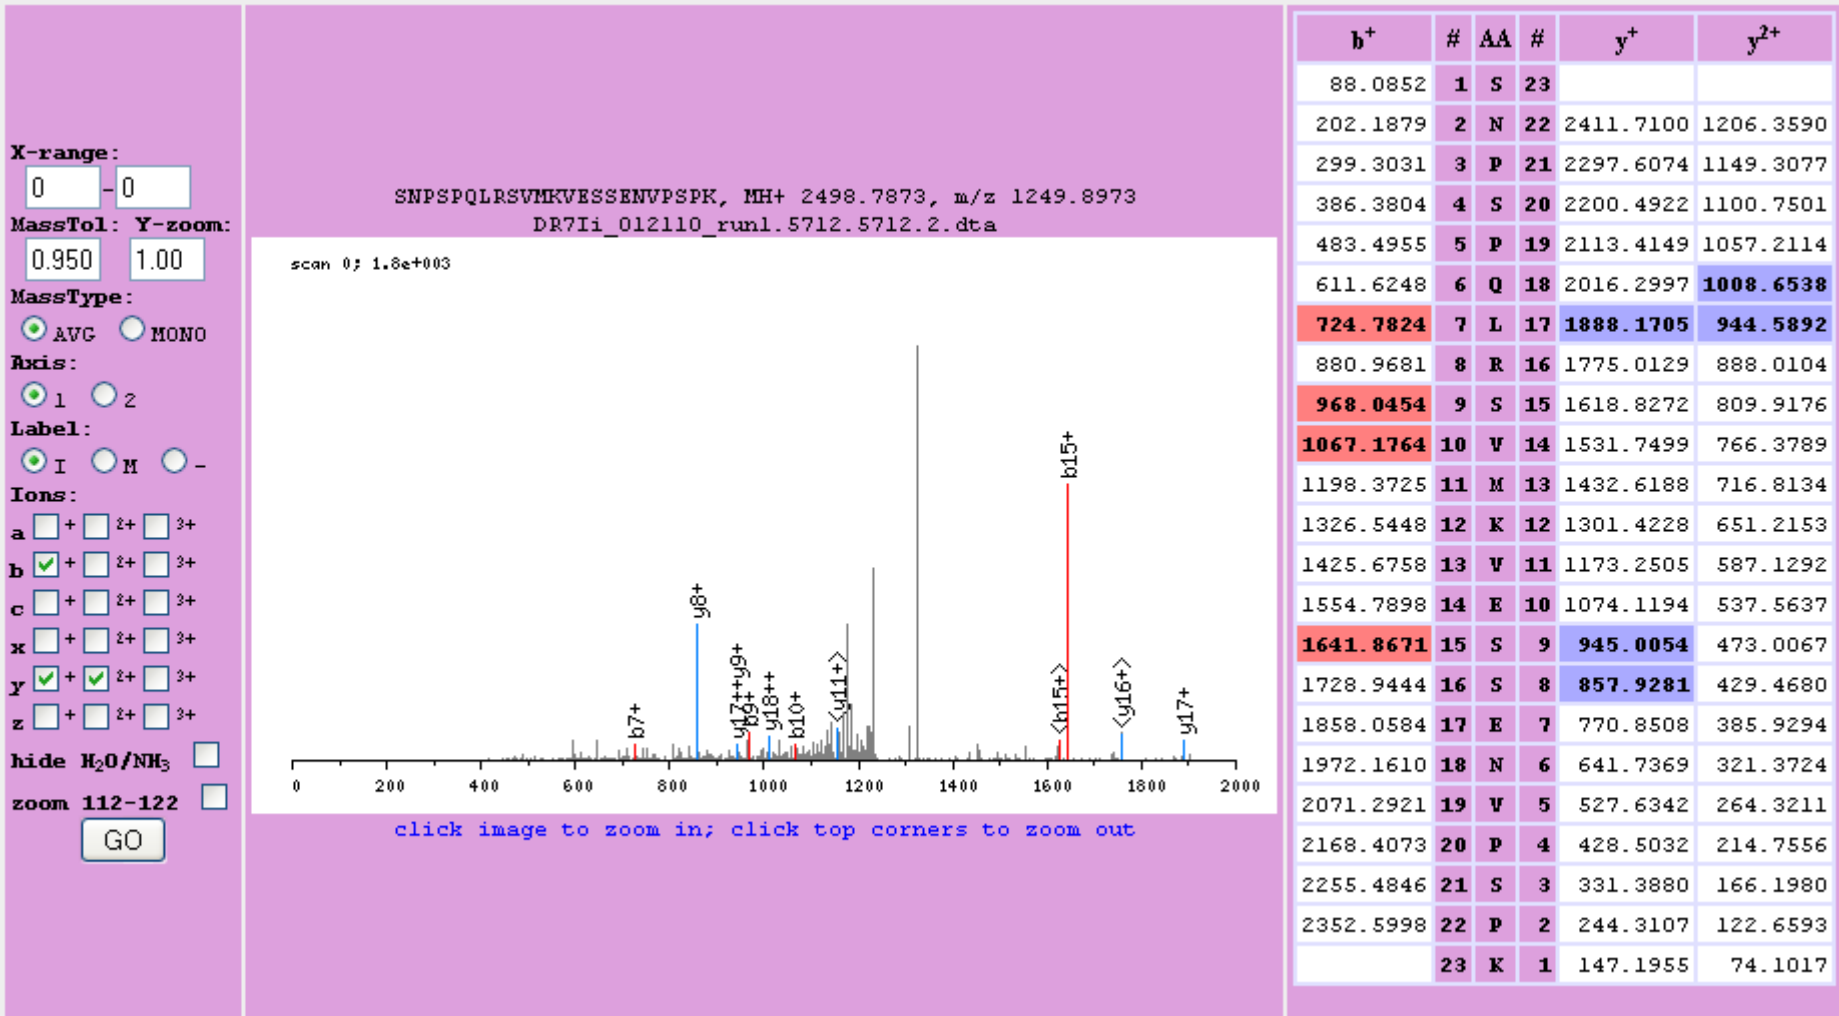

# RLREKDKHIEEVRKN

**X-range:**  
 -

**MassTol:**  **Y-zoom:**

**MassType:**  
 AVG  MONO

**Axis:**  
 1  2

**Label:**  
 I  M  -

**Ions:**

a  +  2+  3+

b  +  2+  3+

c  +  2+  3+

x  +  2+  3+

y  +  2+  3+

z  +  2+  3+

hide H<sub>2</sub>O/NH<sub>3</sub>

zoom 112-122

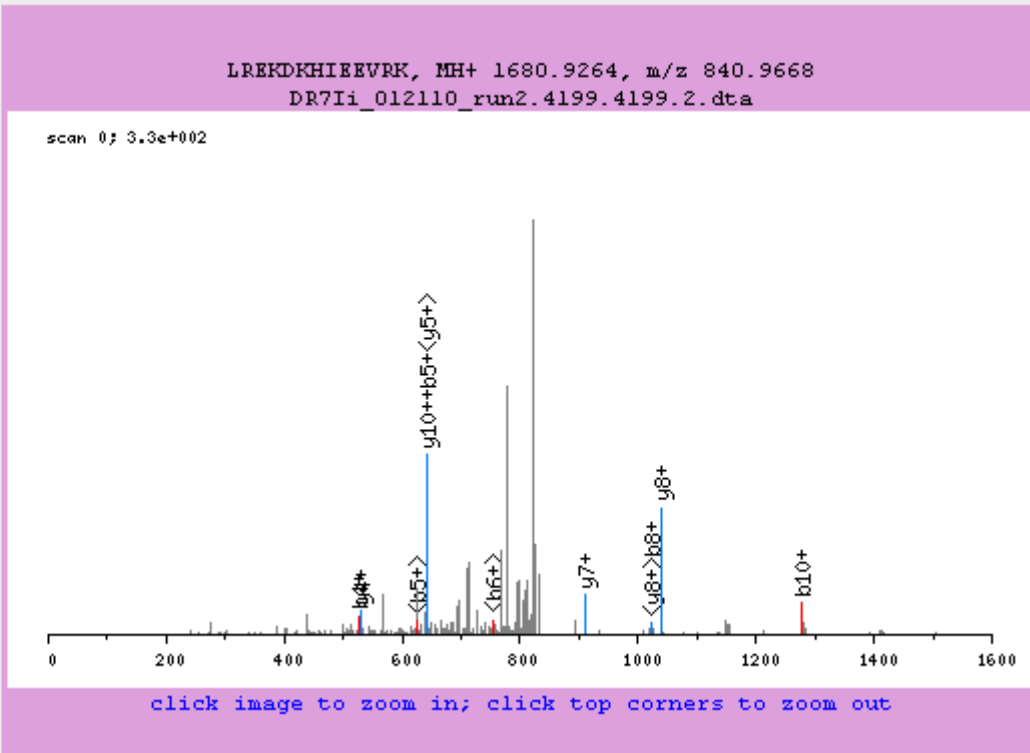

| b <sup>+</sup> | #  | AA | #  | y <sup>+</sup> | y <sup>2+</sup> |
|----------------|----|----|----|----------------|-----------------|
| 114.1656       | 1  | L  | 13 |                |                 |
| 270.3513       | 2  | R  | 12 | 1567.7687      | 784.3883        |
| 399.4652       | 3  | E  | 11 | 1411.5831      | 706.2955        |
| 527.6375       | 4  | K  | 10 | 1282.4691      | 641.7385        |
| 642.7249       | 5  | D  | 9  | 1154.2968      | 577.6524        |
| 770.8972       | 6  | K  | 8  | 1039.2094      | 520.1087        |
| 908.0365       | 7  | H  | 7  | 911.0371       | 456.0225        |
| 1021.1941      | 8  | I  | 6  | 773.8978       | 387.4529        |
| 1150.3081      | 9  | E  | 5  | 660.7402       | 330.8741        |
| 1279.4221      | 10 | E  | 4  | 531.6262       | 266.3171        |
| 1378.5531      | 11 | V  | 3  | 402.5122       | 201.7601        |
| 1534.7388      | 12 | R  | 2  | 303.3812       | 152.1946        |
|                | 13 | K  | 1  | 147.1955       | 74.1017         |



# ELEEALANASDAELCDIAAILGMHTLM

X-range:

0 - 0

MassTol: Y-zoom:

0.950 1.00

MassType:

AVG  MONO

Basis:

1  2

Label:

I  M  -

Ions:

a  +  2+  3+

b  +  2+  3+

c  +  2+  3+

x  +  2+  3+

y  +  2+  3+

z  +  2+  3+

hide H<sub>2</sub>O/NH<sub>3</sub>

zoom 112-122

GO

ELEEALANASDAELCDIAAILGMHTL, MH+ 2585.9242, m/z 1293.4657  
DR7CD80\_012610\_run1.6369.6369.2.dta

scan 0: 5.2e+002

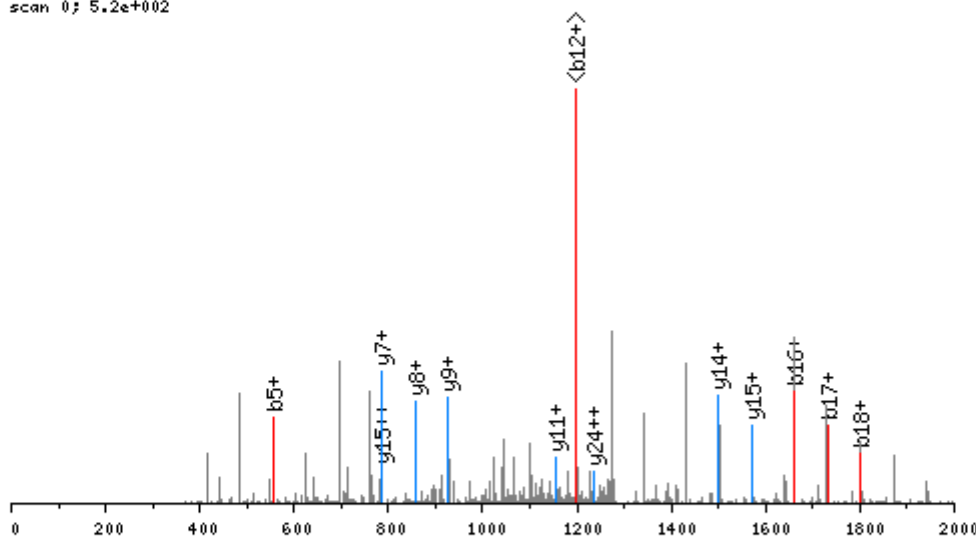

click image to zoom in; click top corners to zoom out

| $b^+$     | #  | AA | #  | $y^+$     | $y^{2+}$  |
|-----------|----|----|----|-----------|-----------|
| 114.1656  | 1  | L  | 25 |           |           |
| 243.2796  | 2  | E  | 24 | 2472.7666 | 1236.8873 |
| 372.3935  | 3  | E  | 23 | 2343.6526 | 1172.3303 |
| 443.4714  | 4  | R  | 22 | 2214.5386 | 1107.7733 |
| 556.6291  | 5  | L  | 21 | 2143.4607 | 1072.2343 |
| 627.7070  | 6  | R  | 20 | 2030.3031 | 1015.6555 |
| 741.8096  | 7  | N  | 19 | 1959.2252 | 980.1166  |
| 812.8875  | 8  | R  | 18 | 1845.1225 | 923.0652  |
| 899.9648  | 9  | S  | 17 | 1774.0446 | 887.5263  |
| 1015.0522 | 10 | D  | 16 | 1686.9673 | 843.9876  |
| 1086.1301 | 11 | R  | 15 | 1571.8799 | 786.4439  |
| 1215.2441 | 12 | E  | 14 | 1500.8020 | 750.9050  |
| 1328.4017 | 13 | L  | 13 | 1371.6881 | 686.3480  |
| 1431.5446 | 14 | C  | 12 | 1258.5304 | 629.7692  |
| 1546.6320 | 15 | D  | 11 | 1155.3875 | 578.1977  |
| 1659.7897 | 16 | I  | 10 | 1040.3001 | 520.6540  |
| 1730.8676 | 17 | R  | 9  | 927.1425  | 464.0752  |
| 1801.9455 | 18 | R  | 8  | 856.0646  | 428.5363  |
| 1915.1031 | 19 | I  | 7  | 784.9867  | 392.9973  |
| 2028.2608 | 20 | L  | 6  | 671.8290  | 336.4185  |
| 2085.3121 | 21 | G  | 5  | 558.6714  | 279.8397  |
| 2216.5081 | 22 | M  | 4  | 501.6201  | 251.3140  |
| 2353.6474 | 23 | H  | 3  | 370.4240  | 185.7160  |
| 2454.7513 | 24 | T  | 2  | 233.2847  | 117.1463  |
|           | 25 | L  | 1  | 132.1809  | 66.5944   |

# LFKRISQFT

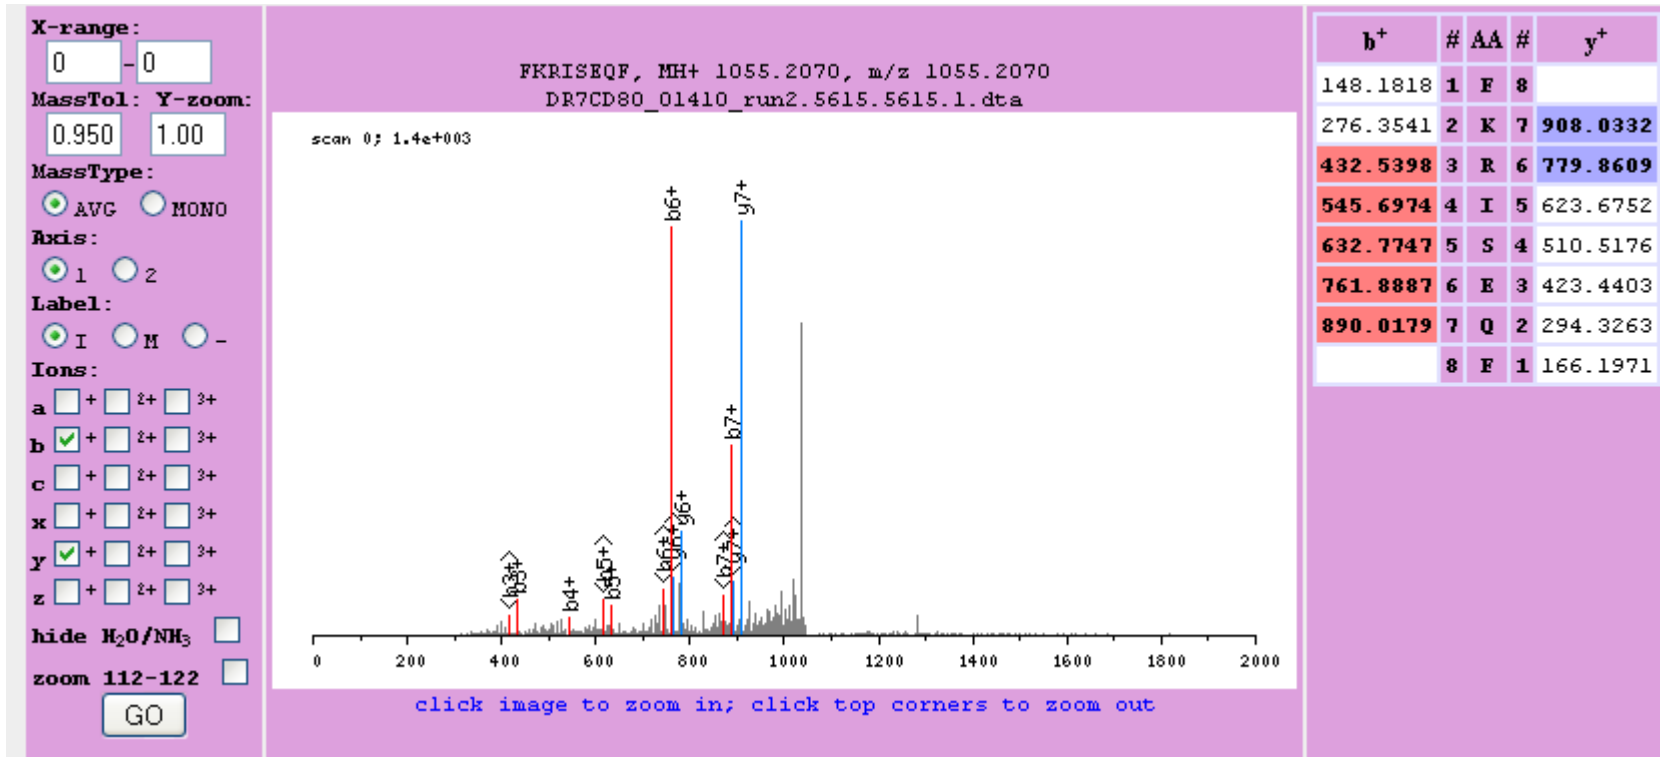

# LPVISAENWKPATKTDQVIQSLI

**X-range:**  
 -   
**MassTol:**    
**MassType:**  
 AVG  MONO  
**Axis:**  
 1  2  
**Label:**  
 I  M  -  
**Ions:**  
 a  +  2+  3+  
 b  +  2+  3+  
 c  +  2+  3+  
 x  +  2+  3+  
 y  +  2+  3+  
 z  +  2+  3+  
 hide H<sub>2</sub>O/NH<sub>3</sub>   
 zoom

PVISAENWKPATKTDQVIQSL, MH+ 2326.6237, m/z 1163.8155  
 DR7Ii\_012110\_run1.6971.6971.2.dta

scan 0; 8.3e+002

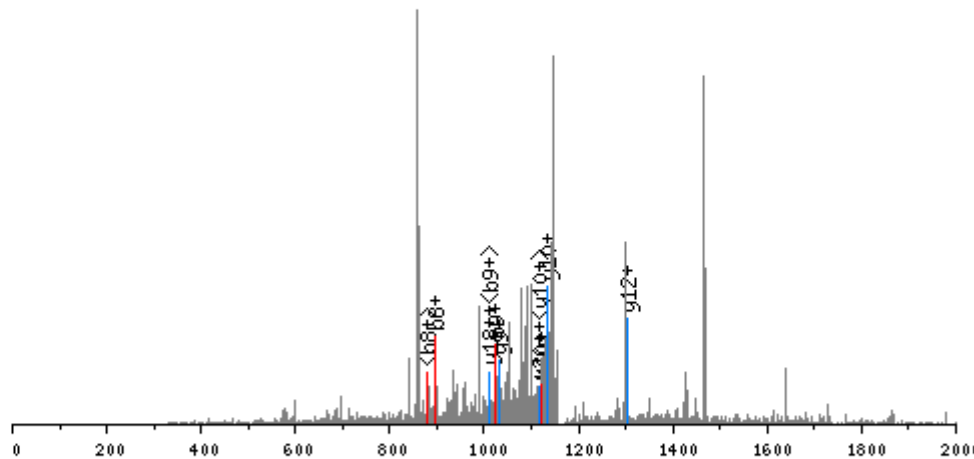

click image to zoom in; click top corners to zoom out

| b <sup>+</sup> | #  | AA | #  | y <sup>+</sup> | y <sup>2+</sup> |
|----------------|----|----|----|----------------|-----------------|
| 98.1231        | 1  | P  | 21 |                |                 |
| 197.2542       | 2  | V  | 20 | 2229.5085      | 1115.2582       |
| 310.4118       | 3  | I  | 19 | 2130.3775      | 1065.6927       |
| 397.4891       | 4  | S  | 18 | 2017.2198      | 1009.1139       |
| 468.5670       | 5  | R  | 17 | 1930.1425      | 965.5752        |
| 597.6810       | 6  | E  | 16 | 1859.0646      | 930.0363        |
| 711.7836       | 7  | N  | 15 | 1729.9506      | 865.4793        |
| 897.9935       | 8  | W  | 14 | 1615.8480      | 808.4280        |
| 1026.1658      | 9  | K  | 13 | 1429.6381      | 715.3230        |
| 1123.2810      | 10 | P  | 12 | 1301.4658      | 651.2369        |
| 1194.3589      | 11 | R  | 11 | 1204.3506      | 602.6793        |
| 1295.4628      | 12 | T  | 10 | 1133.2727      | 567.1403        |
| 1423.6351      | 13 | K  | 9  | 1032.1689      | 516.5884        |
| 1524.7389      | 14 | T  | 8  | 903.9966       | 452.5023        |
| 1639.8263      | 15 | D  | 7  | 802.8927       | 401.9503        |
| 1767.9556      | 16 | Q  | 6  | 687.8053       | 344.4066        |
| 1867.0866      | 17 | V  | 5  | 559.6761       | 280.3420        |
| 1980.2443      | 18 | I  | 4  | 460.5450       | 230.7765        |
| 2108.3735      | 19 | Q  | 3  | 347.3874       | 174.1977        |
| 2195.4508      | 20 | S  | 2  | 219.2582       | 110.1330        |
|                | 21 | L  | 1  | 132.1809       | 66.5944         |

# QVINETSQHDDLE

**X-range:**  
 -

**MassTol:** **Y-zoom:**

**MassType:**  
 AVG  MONO

**Axis:**  
 1  2

**Label:**  
 I  M  -

**Ions:**

a  +  2+  3+

b  +  2+  3+

c  +  2+  3+

x  +  2+  3+

y  +  2+  3+

z  +  2+  3+

hide H<sub>2</sub>O/NH<sub>3</sub>

zoom 112-122

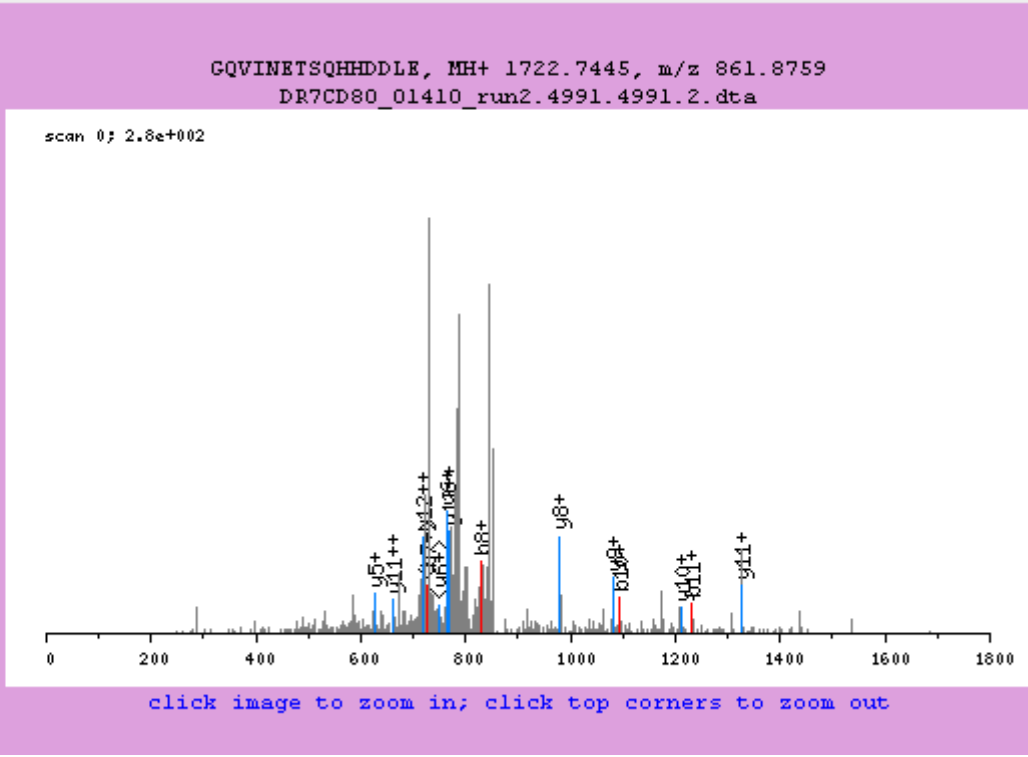

| b <sup>+</sup> | #  | AA | #  | y <sup>+</sup> | y <sup>2+</sup> |
|----------------|----|----|----|----------------|-----------------|
| 58.0593        | 1  | G  | 15 |                |                 |
| 186.1885       | 2  | Q  | 14 | 1665.6931      | 833.3505        |
| 285.3195       | 3  | V  | 13 | 1537.5639      | 769.2859        |
| 398.4772       | 4  | I  | 12 | 1438.4329      | 719.7204        |
| 512.5798       | 5  | N  | 11 | 1325.2752      | 663.1416        |
| 641.6938       | 6  | E  | 10 | 1211.1726      | 606.0903        |
| 742.7977       | 7  | T  | 9  | 1082.0586      | 541.5333        |
| 829.8750       | 8  | S  | 8  | 980.9547       | 490.9813        |
| 958.0042       | 9  | Q  | 7  | 893.8774       | 447.4427        |
| 1095.1435      | 10 | H  | 6  | 765.7482       | 383.3781        |
| 1232.2828      | 11 | H  | 5  | 628.6089       | 314.8084        |
| 1347.3702      | 12 | D  | 4  | 491.4696       | 246.2388        |
| 1462.4576      | 13 | D  | 3  | 376.3822       | 188.6951        |
| 1575.6152      | 14 | L  | 2  | 261.2948       | 131.1514        |
|                | 15 | E  | 1  | 148.1372       | 74.5726         |

# YKCSDCGKAFTTKSGLNVHQRK

**X-range:**  
 -

**MassTol:** **Y-zoom:**

**MassType:**  
 AVG  MONO

**Axis:**  
 1  2

**Label:**  
 I  M  -

**Ions:**

a  +  2+  3+

b  +  2+  3+

c  +  2+  3+

x  +  2+  3+

y  +  2+  3+

z  +  2+  3+

hide H<sub>2</sub>O/NH<sub>3</sub>

zoom

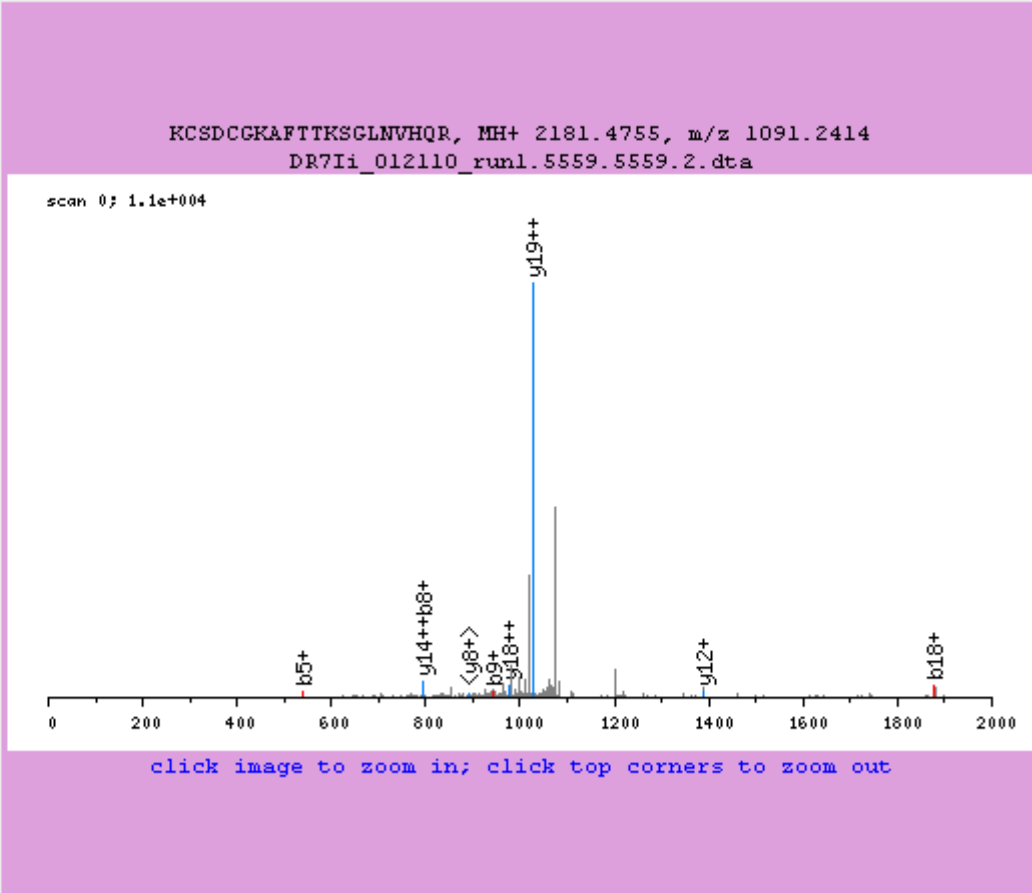

| b <sup>+</sup> | #  | AA | #  | y <sup>+</sup> | y <sup>2+</sup> |
|----------------|----|----|----|----------------|-----------------|
| 129.1802       | 1  | K  | 20 |                |                 |
| 232.3231       | 2  | C  | 19 | 2053.3033      | 1027.1556       |
| 319.4004       | 3  | S  | 18 | 1950.1604      | 975.5841        |
| 434.4878       | 4  | D  | 17 | 1863.0831      | 932.0455        |
| 537.6307       | 5  | C  | 16 | 1747.9957      | 874.5018        |
| 594.6820       | 6  | G  | 15 | 1644.8528      | 822.9303        |
| 722.8543       | 7  | K  | 14 | 1587.8014      | 794.4047        |
| 793.9322       | 8  | R  | 13 | 1459.6292      | 730.3185        |
| 941.1061       | 9  | F  | 12 | 1388.5513      | 694.7796        |
| 1042.2100      | 10 | T  | 11 | 1241.3774      | 621.1927        |
| 1143.3138      | 11 | T  | 10 | 1140.2735      | 570.6407        |
| 1271.4861      | 12 | K  | 9  | 1039.1696      | 520.0888        |
| 1358.5634      | 13 | S  | 8  | 910.9974       | 456.0026        |
| 1415.6147      | 14 | G  | 7  | 823.9201       | 412.4640        |
| 1528.7724      | 15 | L  | 6  | 766.8687       | 383.9383        |
| 1642.8750      | 16 | N  | 5  | 653.7111       | 327.3595        |
| 1742.0061      | 17 | V  | 4  | 539.6085       | 270.3082        |
| 1879.1454      | 18 | H  | 3  | 440.4774       | 220.7427        |
| 2007.2746      | 19 | Q  | 2  | 303.3381       | 152.1730        |
|                | 20 | R  | 1  | 175.2089       | 88.1084         |
