# Supplementary material
Source: PubMed Central journal article supplement (PMC3494186)
Supplement: supp_M112.019232_Supplemental_figure_3.pdf [file supp_M112.019232_Supplemental_figure_3.pdf]

**Supplemental Figure 3.** Spectra of proteins from CIITA and CIITA/i<sup>-</sup> siRNA cells identified by a single peptide.

# TGHMGKLVPLKETIKGF

**X-range:**  
 -

**MassTol:**  **Y-zoom:**

**MassType:**  
 AVG  MONO

**Axis:**  
 1  2

**Label:**  
 I  M  -

**Ions:**

a  +  2+  3+

b  +  2+  3+

c  +  2+  3+

x  +  2+  3+

y  +  2+  3+

z  +  2+  3+

**hide H<sub>2</sub>O/NH<sub>3</sub>**

**zoom 112-122**

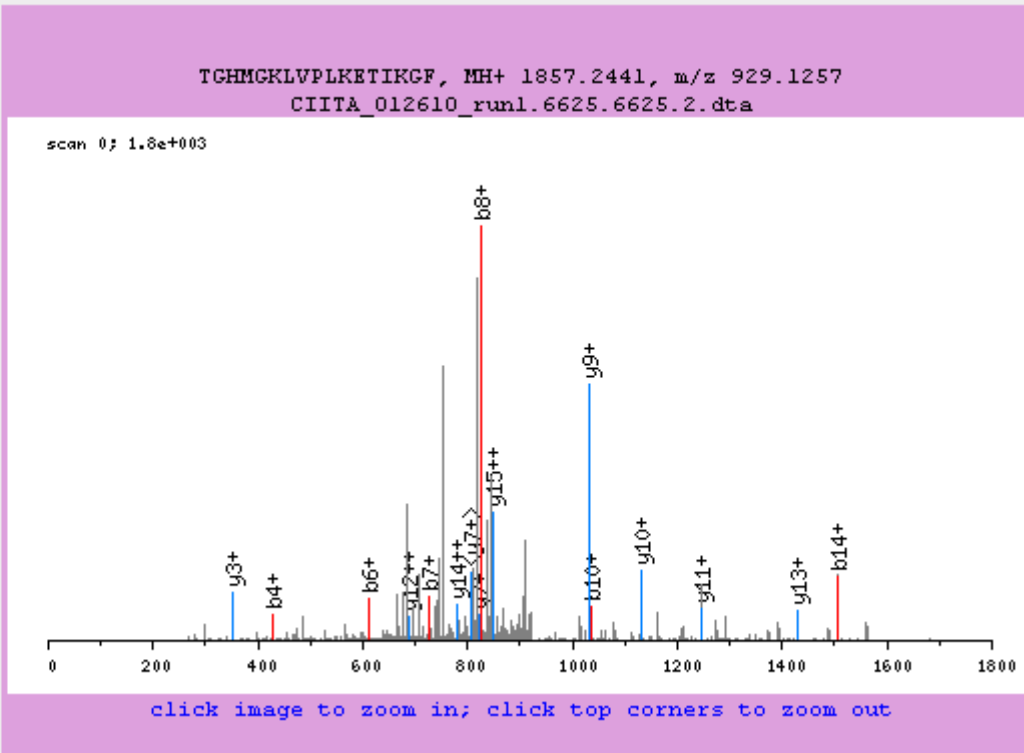

| b <sup>+</sup> | #  | AA | #  | y <sup>+</sup> | y <sup>2+</sup> |
|----------------|----|----|----|----------------|-----------------|
| 102.1118       | 1  | T  | 17 |                |                 |
| 159.1631       | 2  | G  | 16 | 1756.1402      | 878.5741        |
| 296.3024       | 3  | H  | 15 | 1699.0889      | 850.0484        |
| 427.4985       | 4  | M  | 14 | 1561.9496      | 781.4788        |
| 484.5498       | 5  | G  | 13 | 1430.7536      | 715.8808        |
| 612.7221       | 6  | K  | 12 | 1373.7023      | 687.3551        |
| 725.8797       | 7  | L  | 11 | 1245.5300      | 623.2690        |
| 825.0108       | 8  | V  | 10 | 1132.3723      | 566.6901        |
| 922.1260       | 9  | P  | 9  | 1033.2413      | 517.1246        |
| 1035.2836      | 10 | L  | 8  | 936.1261       | 468.5670        |
| 1163.4559      | 11 | K  | 7  | 822.9685       | 411.9882        |
| 1292.5699      | 12 | E  | 6  | 694.7962       | 347.9021        |
| 1393.6737      | 13 | T  | 5  | 565.6822       | 283.3451        |
| 1506.8314      | 14 | I  | 4  | 464.5783       | 232.7931        |
| 1635.0037      | 15 | K  | 3  | 351.4207       | 176.2143        |
| 1692.0550      | 16 | G  | 2  | 223.2484       | 112.1282        |
|                | 17 | F  | 1  | 166.1971       | 83.6025         |

# YVRPLPPAAIESPAVAAPAYSRA

X-range:

0 - 0

MassTol: Y-zoom:

0.950 1.00

MassType:

AVG  MONO

Axis:

1  2

Label:

I  H  -

Ions:

a  +  2+  3+

b  +  2+  3+

c  +  2+  3+

x  +  2+  3+

y  +  2+  3+

z  +  2+  3+

hide H<sub>2</sub>O/NH<sub>3</sub>

zoom 112-122

GO

WLGSSWPQYVRPLPPAAIESPAVAAPAYSRA, MH+ 3225.6316, m/z 1075.8820  
CIITA\_122309\_run1.7600.7600.3.dta

scan 0; 7.8e+02

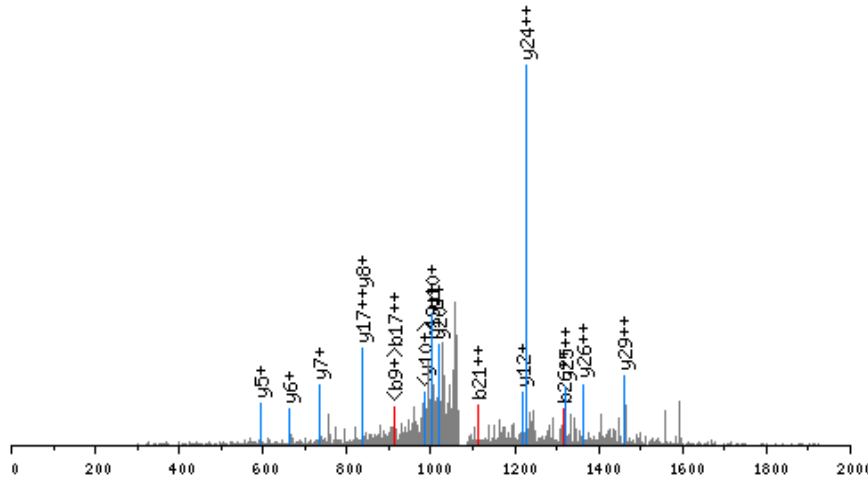

click image to zoom in; click top corners to zoom out

| b <sup>+</sup> | b <sup>2+</sup> | #  | AA | #  | y <sup>+</sup> | y <sup>2+</sup> | y <sup>3+</sup> |
|----------------|-----------------|----|----|----|----------------|-----------------|-----------------|
| 187.2178       | 94.1129         | 1  | W  | 31 |                |                 |                 |
| 300.3755       | 150.6917        | 2  | L  | 30 | 3039.4217      | 1520.2148       | 1013.8125       |
| 357.4268       | 179.2174        | 3  | G  | 29 | 2926.2640      | 1463.6360       | 976.0933        |
| 414.4781       | 207.7430        | 4  | G  | 28 | 2869.2127      | 1435.1103       | 957.0762        |
| 501.5554       | 251.2817        | 5  | S  | 27 | 2812.1614      | 1406.5847       | 938.0591        |
| 588.6327       | 294.8203        | 6  | S  | 26 | 2725.0841      | 1363.0460       | 909.0333        |
| 774.8426       | 387.9253        | 7  | W  | 25 | 2638.0068      | 1319.5074       | 880.0076        |
| 871.9578       | 436.4829        | 8  | P  | 24 | 2451.7969      | 1226.4024       | 817.9376        |
| 929.0091       | 465.0085        | 9  | G  | 23 | 2354.6817      | 1177.8448       | 785.5659        |
| 1092.1824      | 546.5952        | 10 | Y  | 22 | 2297.6304      | 1149.3192       | 766.5488        |
| 1191.3134      | 596.1607        | 11 | V  | 21 | 2134.4571      | 1067.7325       | 712.1577        |
| 1347.4991      | 674.2535        | 12 | R  | 20 | 2035.3261      | 1018.1670       | 679.1140        |
| 1444.6143      | 722.8111        | 13 | P  | 19 | 1879.1404      | 940.0742        | 627.0521        |
| 1557.7719      | 779.3899        | 14 | L  | 18 | 1782.0252      | 891.5166        | 594.6804        |
| 1654.8871      | 827.9475        | 15 | P  | 17 | 1668.8676      | 834.9378        | 556.9611        |
| 1752.0023      | 876.5051        | 16 | P  | 16 | 1571.7524      | 786.3802        | 524.5894        |
| 1823.0802      | 912.0441        | 17 | R  | 15 | 1474.6372      | 737.8226        | 492.2177        |
| 1894.1581      | 947.5830        | 18 | R  | 14 | 1403.5593      | 702.2836        | 468.5251        |
| 2007.3157      | 1004.1618       | 19 | I  | 13 | 1332.4814      | 666.7447        | 444.8324        |
| 2136.4297      | 1068.7188       | 20 | E  | 12 | 1219.3238      | 610.1659        | 407.1132        |
| 2223.5070      | 1112.2575       | 21 | S  | 11 | 1090.2098      | 545.6089        | 364.0752        |
| 2320.6222      | 1160.8151       | 22 | P  | 10 | 1003.1325      | 502.0702        | 335.0495        |
| 2391.7001      | 1196.3540       | 23 | R  | 9  | 906.0173       | 453.5126        | 302.6777        |
| 2490.8312      | 1245.9195       | 24 | V  | 8  | 834.9394       | 417.9737        | 278.9851        |
| 2561.9091      | 1281.4585       | 25 | R  | 7  | 735.8083       | 368.4081        | 245.9414        |
| 2632.9870      | 1316.9974       | 26 | R  | 6  | 664.7304       | 332.8692        | 222.2488        |
| 2730.1021      | 1365.5550       | 27 | P  | 5  | 593.6525       | 297.3302        | 198.5561        |
| 2801.1800      | 1401.0940       | 28 | R  | 4  | 496.5374       | 248.7727        | 166.1844        |
| 2964.3533      | 1482.6806       | 29 | Y  | 3  | 425.4595       | 213.2337        | 142.4918        |
| 3051.4306      | 1526.2193       | 30 | S  | 2  | 262.2862       | 131.6471        | 88.1007         |
|                |                 | 31 | R  | 1  | 175.2089       | 88.1084         | 59.0749         |

# LKVTKAAGTKKQFQKF

**X-range:**  
 -

**MassTol:** **Y-zoom:**

**MassType:**  
 AVG  MONO

**Axis:**  
 1  2

**Label:**  
 I  M  -

**Ions:**  
 a  +  2+  3+  
 b  +  2+  3+  
 c  +  2+  3+  
 x  +  2+  3+  
 y  +  2+  3+  
 z  +  2+  3+

hide H<sub>2</sub>O/NH<sub>3</sub>

zoom 112-122

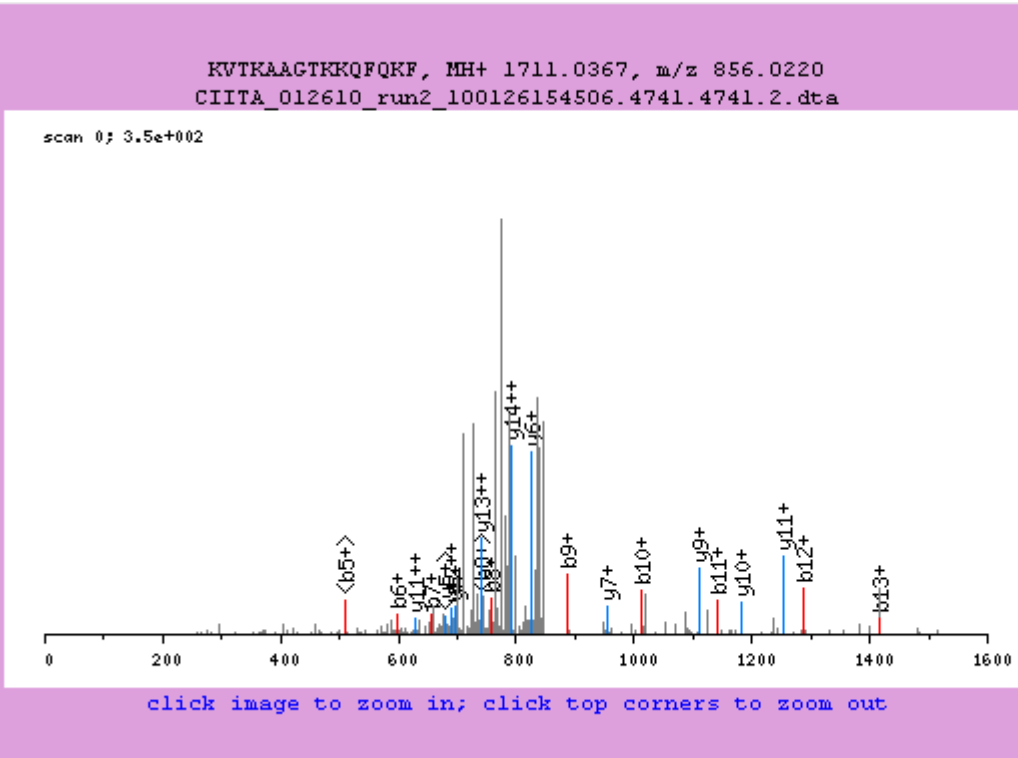

| b <sup>+</sup> | #  | AA | #  | y <sup>+</sup> | y <sup>2+</sup> |
|----------------|----|----|----|----------------|-----------------|
| 129.1802       | 1  | K  | 15 |                |                 |
| 228.3113       | 2  | V  | 14 | 1582.8644      | 791.9362        |
| 329.4152       | 3  | T  | 13 | 1483.7334      | 742.3707        |
| 457.5874       | 4  | K  | 12 | 1382.6295      | 691.8187        |
| 528.6653       | 5  | A  | 11 | 1254.4572      | 627.7326        |
| 599.7432       | 6  | A  | 10 | 1183.3793      | 592.1936        |
| 656.7946       | 7  | G  | 9  | 1112.3014      | 556.6547        |
| 757.8984       | 8  | T  | 8  | 1055.2501      | 528.1290        |
| 886.0707       | 9  | K  | 7  | 954.1462       | 477.5771        |
| 1014.2430      | 10 | K  | 6  | 825.9739       | 413.4909        |
| 1142.3722      | 11 | Q  | 5  | 697.8017       | 349.4048        |
| 1289.5461      | 12 | F  | 4  | 569.6724       | 285.3402        |
| 1417.6753      | 13 | Q  | 3  | 422.4986       | 211.7533        |
| 1545.8476      | 14 | K  | 2  | 294.3694       | 147.6886        |
|                | 15 | F  | 1  | 166.1971       | 83.6025         |

# LRDSHGVAQVRF

**X-range:**  
 -

**MassTol:**  **Y-zoom:**

**MassType:**  
 AVG  MONO

**Axis:**  
 1  2

**Label:**  
 I  M  -

**Ions:**

a  +  2+  3+

b  +  2+  3+

c  +  2+  3+

x  +  2+  3+

y  +  2+  3+

z  +  2+  3+

hide H<sub>2</sub>O/NH<sub>3</sub>

zoom 112-122

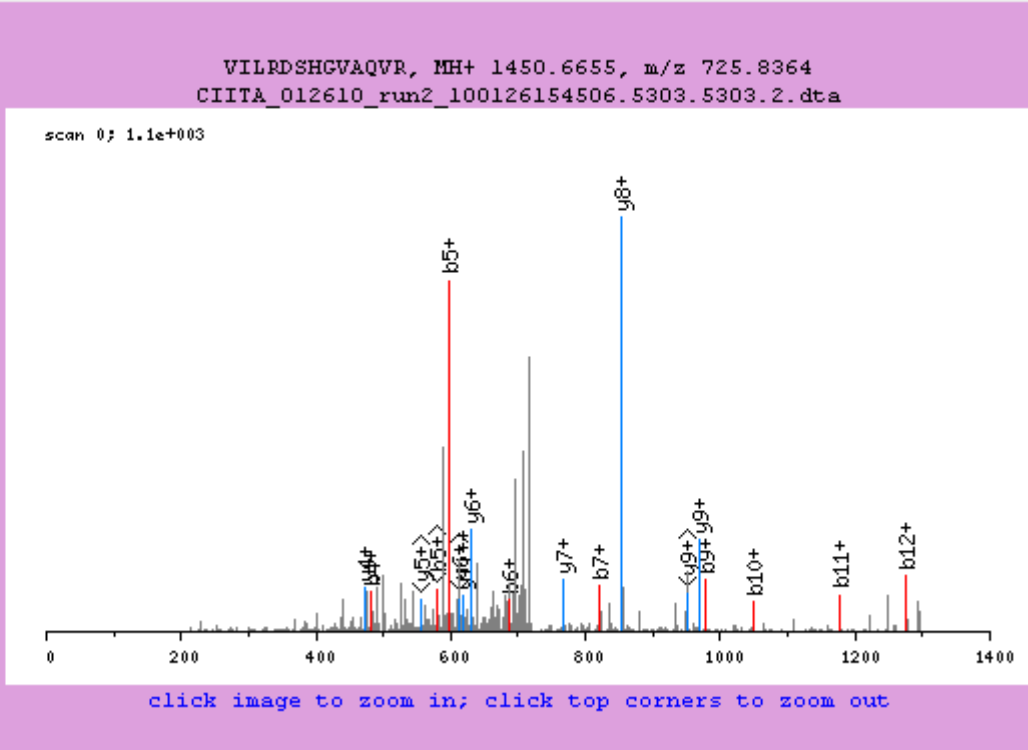

| b <sup>+</sup> | #  | AA | #  | y <sup>+</sup> | y <sup>2+</sup> |
|----------------|----|----|----|----------------|-----------------|
| 100.1390       | 1  | V  | 13 |                |                 |
| 213.2966       | 2  | I  | 12 | 1351.5344      | 676.2712        |
| 326.4543       | 3  | L  | 11 | 1238.3768      | 619.6924        |
| 482.6400       | 4  | R  | 10 | 1125.2191      | 563.1135        |
| 597.7274       | 5  | D  | 9  | 969.0334       | 485.0207        |
| 684.8047       | 6  | S  | 8  | 853.9460       | 427.4770        |
| 821.9439       | 7  | H  | 7  | 766.8687       | 383.9383        |
| 878.9953       | 8  | G  | 6  | 629.7295       | 315.3687        |
| 978.1263       | 9  | V  | 5  | 572.6781       | 286.8430        |
| 1049.2042      | 10 | R  | 4  | 473.5471       | 237.2775        |
| 1177.3334      | 11 | Q  | 3  | 402.4692       | 201.7386        |
| 1276.4645      | 12 | V  | 2  | 274.3400       | 137.6740        |
|                | 13 | R  | 1  | 175.2089       | 88.1084         |

# MPGVTVKDVENQEF

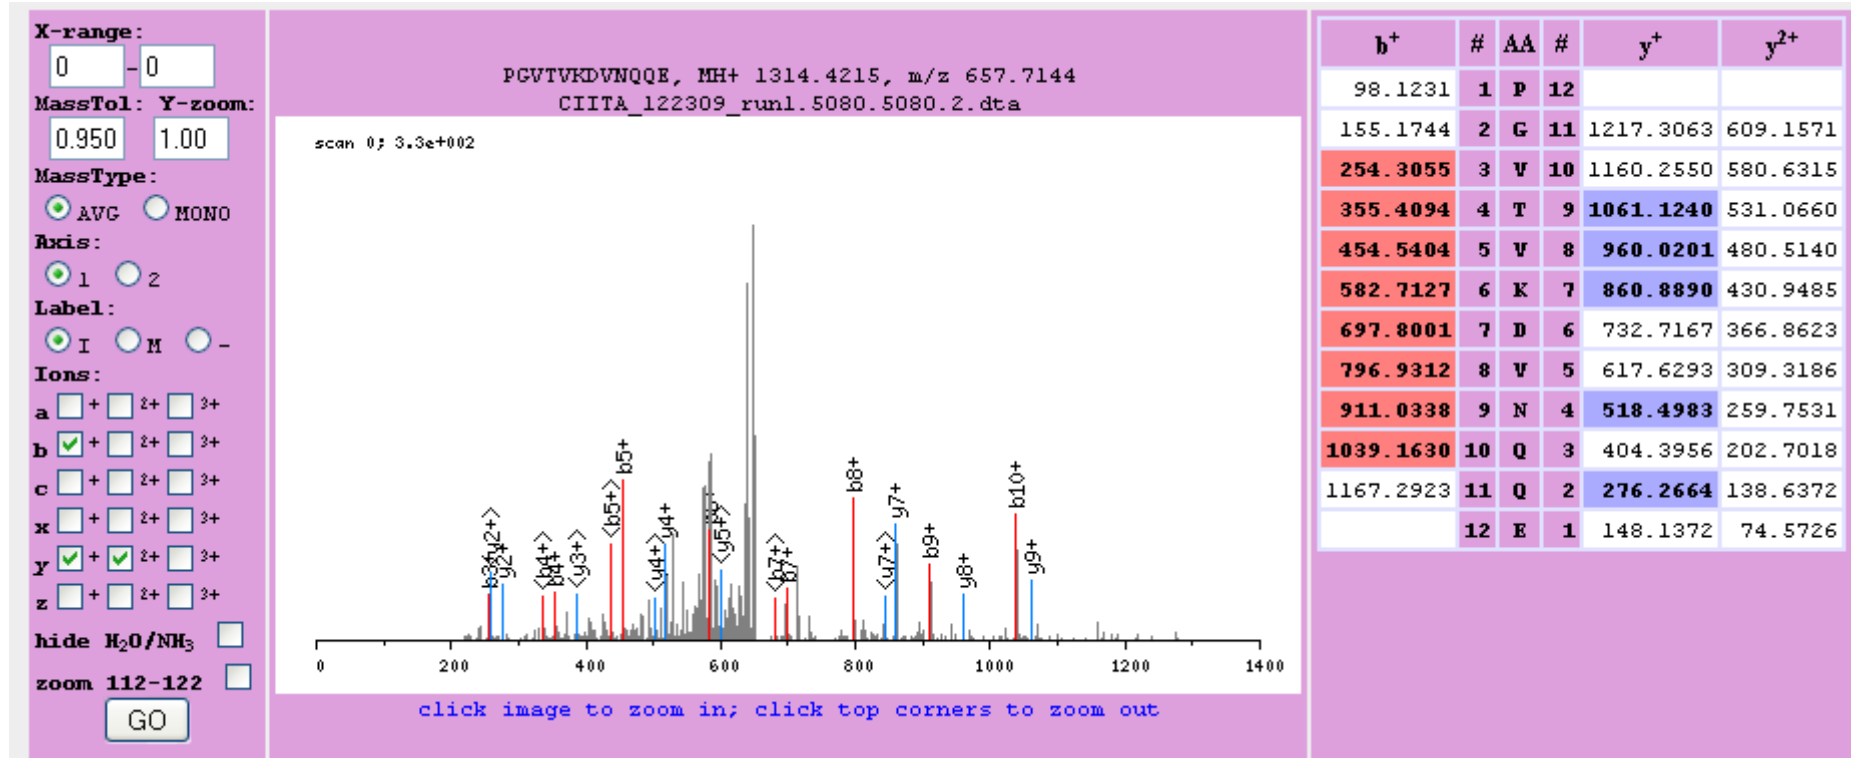

# FTKSPYQEFTDHLVKTHTRV

X-range:

0 - 0

MassTol: Y-zoom:

0.950 1.00

MassType:

AVG  MONO

Axis:

1  2

Label:

I  M  -

Ions:

a  +  2+  3+

b  +  2+  3+

c  +  2+  3+

x  +  2+  3+

y  +  2+  3+

z  +  2+  3+

hide H<sub>2</sub>O/NH<sub>3</sub>

zoom 112-122

GO

TKSPYQEFTDHLVKTHTR, MH+ 2189.4064, m/z 1095.2069  
CIITA\_012610\_run1.6578.6580.2.dta

scan 0; 2.8e+003

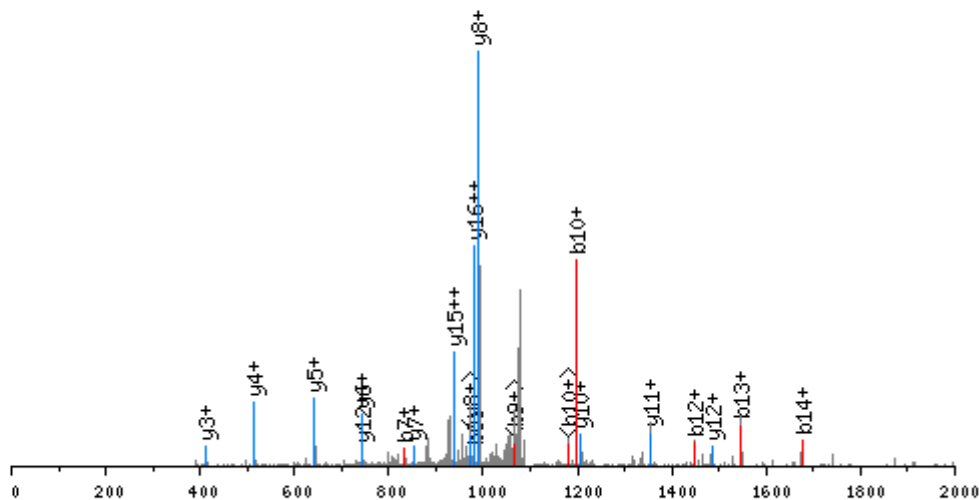

click image to zoom in; click top corners to zoom out

| b <sup>+</sup> | #  | AA | #  | y <sup>+</sup> | y <sup>2+</sup> |
|----------------|----|----|----|----------------|-----------------|
| 102.1118       | 1  | T  | 18 |                |                 |
| 230.2841       | 2  | K  | 17 | 2088.3026      | 1044.6552       |
| 317.3614       | 3  | S  | 16 | 1960.1303      | 980.5691        |
| 414.4766       | 4  | P  | 15 | 1873.0530      | 937.0305        |
| 577.6498       | 5  | Y  | 14 | 1775.9378      | 888.4729        |
| 705.7791       | 6  | Q  | 13 | 1612.7645      | 806.8862        |
| 834.8930       | 7  | E  | 12 | 1484.6353      | 742.8216        |
| 982.0669       | 8  | F  | 11 | 1355.5213      | 678.2646        |
| 1083.1708      | 9  | T  | 10 | 1208.3475      | 604.6777        |
| 1198.2582      | 10 | D  | 9  | 1107.2436      | 554.1258        |
| 1335.3975      | 11 | H  | 8  | 992.1562       | 496.5821        |
| 1448.5551      | 12 | L  | 7  | 855.0169       | 428.0124        |
| 1547.6862      | 13 | V  | 6  | 741.8593       | 371.4336        |
| 1675.8584      | 14 | K  | 5  | 642.7282       | 321.8681        |
| 1776.9623      | 15 | T  | 4  | 514.5559       | 257.7819        |
| 1914.1016      | 16 | H  | 3  | 413.4521       | 207.2300        |
| 2015.2055      | 17 | T  | 2  | 276.3128       | 138.6604        |
|                | 18 | R  | 1  | 175.2089       | 88.1084         |

# LVSKHRAQVIYTRNTKGGDAPAAGEDA

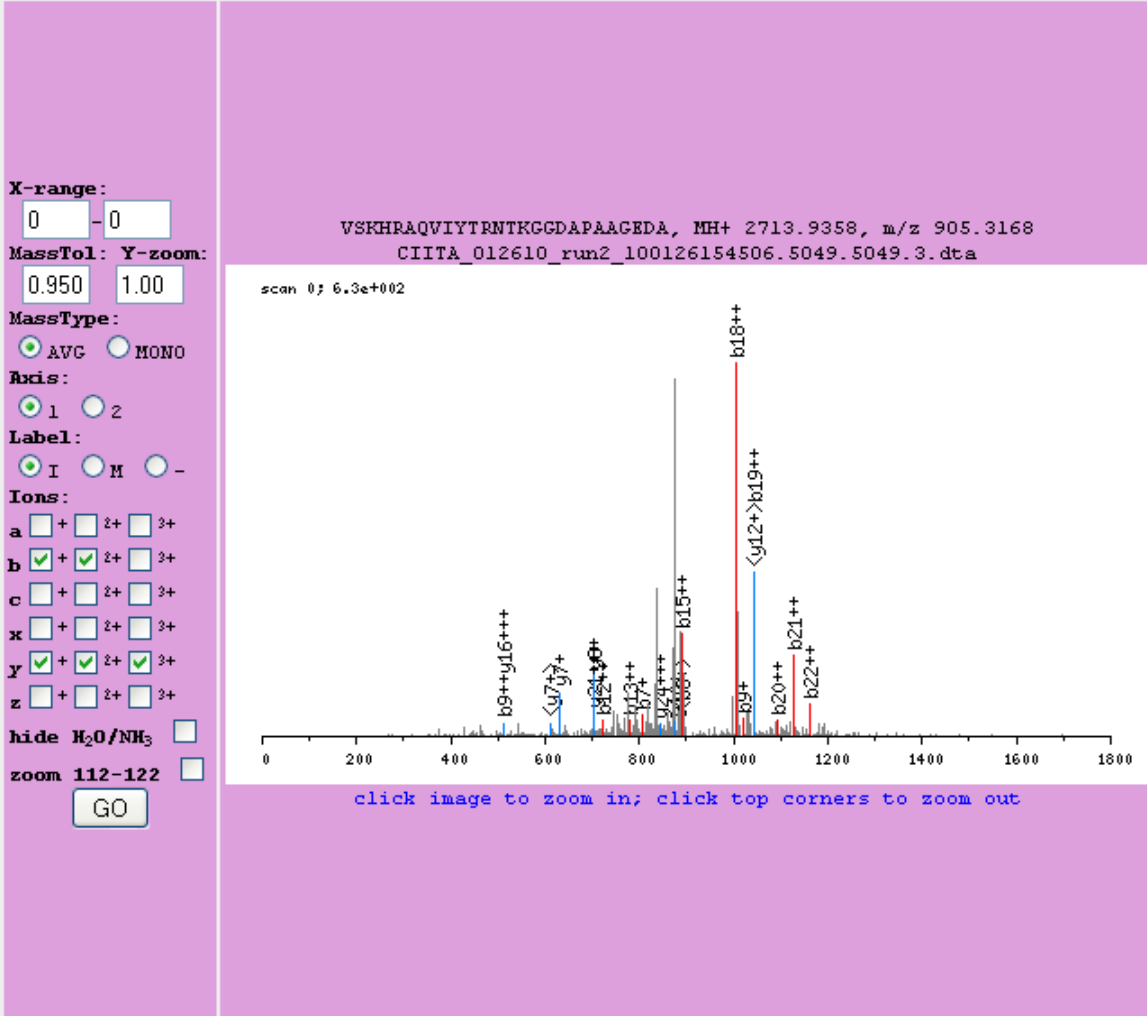

| b <sup>+</sup> | b <sup>2+</sup> | #  | AA | #  | y <sup>+</sup> | y <sup>2+</sup> | y <sup>3+</sup> |
|----------------|-----------------|----|----|----|----------------|-----------------|-----------------|
| 100.1390       | 50.5735         | 1  | V  | 26 |                |                 |                 |
| 187.2163       | 94.1121         | 2  | S  | 25 | 2614.8047      | 1307.9063       | 872.2735        |
| 315.3886       | 158.1983        | 3  | K  | 24 | 2527.7274      | 1264.3677       | 843.2478        |
| 452.5279       | 226.7679        | 4  | H  | 23 | 2399.5551      | 1200.2815       | 800.5237        |
| 608.7135       | 304.8607        | 5  | R  | 22 | 2262.4159      | 1131.7119       | 754.8106        |
| 679.7914       | 340.3997        | 6  | R  | 21 | 2106.2302      | 1053.6191       | 702.7487        |
| 807.9207       | 404.4643        | 7  | Q  | 20 | 2035.1523      | 1018.0801       | 679.0561        |
| 907.0517       | 454.0298        | 8  | V  | 19 | 1907.0231      | 954.0155        | 636.3463        |
| 1020.2094      | 510.6087        | 9  | I  | 18 | 1807.8920      | 904.4500        | 603.3026        |
| 1183.3826      | 592.1953        | 10 | Y  | 17 | 1694.7344      | 847.8712        | 565.5834        |
| 1284.4865      | 642.7472        | 11 | T  | 16 | 1531.5611      | 766.2845        | 511.1923        |
| 1440.6722      | 720.8401        | 12 | R  | 15 | 1430.4572      | 715.7326        | 477.4910        |
| 1554.7748      | 777.8914        | 13 | N  | 14 | 1274.2715      | 637.6397        | 425.4291        |
| 1655.8787      | 828.4433        | 14 | T  | 13 | 1160.1689      | 580.5884        | 387.3949        |
| 1784.0510      | 892.5295        | 15 | K  | 12 | 1059.0650      | 530.0365        | 353.6936        |
| 1841.1023      | 921.0551        | 16 | G  | 11 | 930.8927       | 465.9503        | 310.9695        |
| 1898.1536      | 949.5808        | 17 | G  | 10 | 873.8414       | 437.4247        | 291.9524        |
| 2013.2410      | 1007.1245       | 18 | D  | 9  | 816.7901       | 408.8990        | 272.9353        |
| 2084.3189      | 1042.6634       | 19 | R  | 8  | 701.7027       | 351.3553        | 234.5729        |
| 2181.4341      | 1091.2210       | 20 | P  | 7  | 630.6248       | 315.8164        | 210.8802        |
| 2252.5120      | 1126.7600       | 21 | R  | 6  | 533.5096       | 267.2588        | 178.5085        |
| 2323.5899      | 1162.2989       | 22 | R  | 5  | 462.4317       | 231.7198        | 154.8159        |
| 2380.6412      | 1190.8246       | 23 | G  | 4  | 391.3538       | 196.1809        | 131.1232        |
| 2509.7552      | 1255.3816       | 24 | E  | 3  | 334.3025       | 167.6552        | 112.1061        |
| 2624.8426      | 1312.9253       | 25 | D  | 2  | 205.1885       | 103.0982        | 69.0681         |
|                |                 | 26 | R  | 1  | 90.1011        | 45.5545         | 30.7057         |



# AIINSGPREDSTRI

**X-range:**  
 -

**MassTol:**  **Y-zoom:**

**MassType:**  
 AVG  MONO

**Axis:**  
 1  2

**Label:**  
 I  M  -

**Ions:**

a  +  2+  3+

b  +  2+  3+

c  +  2+  3+

x  +  2+  3+

y  +  2+  3+

z  +  2+  3+

hide H<sub>2</sub>O/NH<sub>3</sub>

zoom 112-122

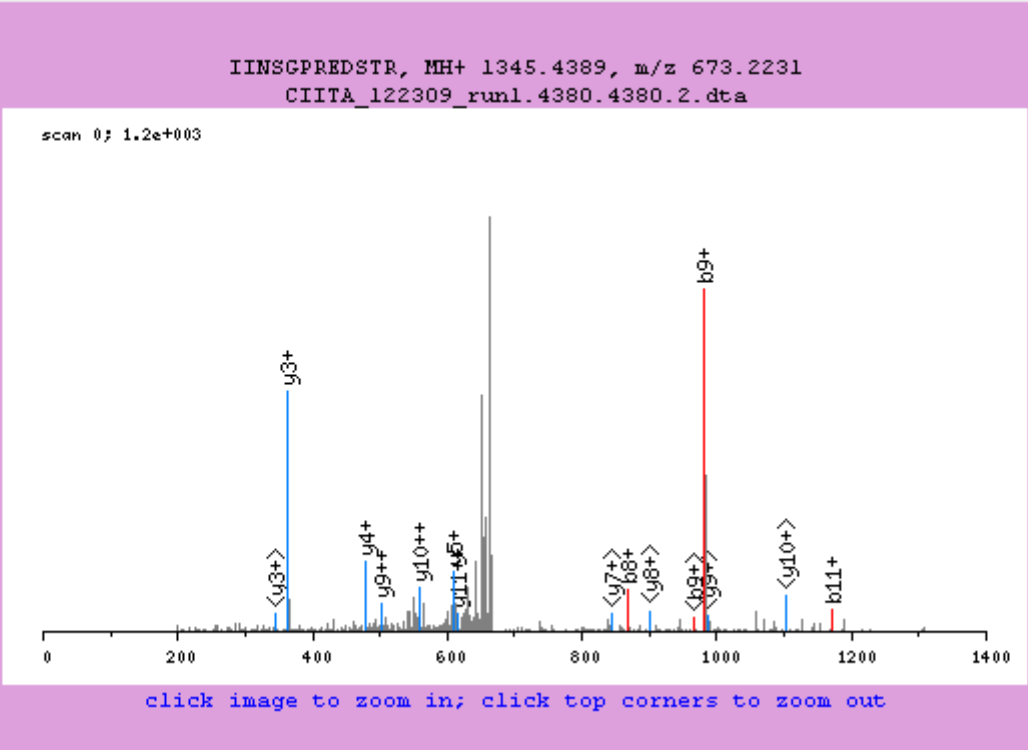

| b <sup>+</sup> | #  | AA | #  | y <sup>+</sup> | y <sup>2+</sup> |
|----------------|----|----|----|----------------|-----------------|
| 114.1656       | 1  | I  | 12 |                |                 |
| 227.3232       | 2  | I  | 11 | 1232.2812      | 616.6446        |
| 341.4259       | 3  | N  | 10 | 1119.1236      | 560.0658        |
| 428.5032       | 4  | S  | 9  | 1005.0209      | 503.0144        |
| 485.5545       | 5  | G  | 8  | 917.9436       | 459.4758        |
| 582.6697       | 6  | P  | 7  | 860.8923       | 430.9501        |
| 738.8553       | 7  | R  | 6  | 763.7771       | 382.3925        |
| 867.9693       | 8  | E  | 5  | 607.5915       | 304.2997        |
| 983.0567       | 9  | D  | 4  | 478.4775       | 239.7427        |
| 1070.1340      | 10 | S  | 3  | 363.3901       | 182.1990        |
| 1171.2379      | 11 | T  | 2  | 276.3128       | 138.6604        |
|                | 12 | R  | 1  | 175.2089       | 88.1084         |

# KVAPAPAVVKKQEAKK

**X-range:**  -

**MassTol:**  **Y-zoom:**

**MassType:**  
 AVG  MONO

**Axis:**  
 1  2

**Label:**  
 I  M  -

**Ions:**

a  +  2+  3+

b  +  2+  3+

c  +  2+  3+

x  +  2+  3+

y  +  2+  3+

z  +  2+  3+

hide H<sub>2</sub>O/NH<sub>3</sub>

zoom

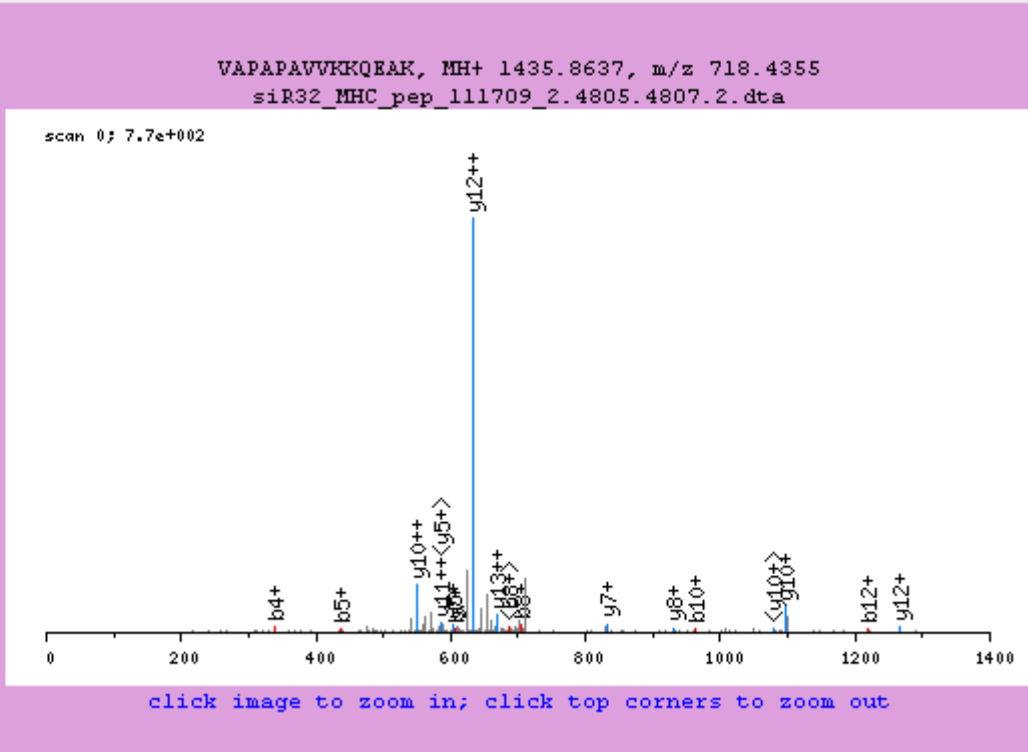

| b <sup>+</sup> | #  | AA | #  | y <sup>+</sup> | y <sup>2+</sup> |
|----------------|----|----|----|----------------|-----------------|
| 100.0762       | 1  | V  | 14 |                |                 |
| 171.1134       | 2  | R  | 13 | 1336.7953      | 668.9015        |
| 268.1661       | 3  | P  | 12 | 1265.7581      | 633.3830        |
| 339.2032       | 4  | R  | 11 | 1168.7054      | 584.8566        |
| 436.2560       | 5  | P  | 10 | 1097.6683      | 549.3380        |
| 507.2931       | 6  | R  | 9  | 1000.6155      | 500.8117        |
| 606.3615       | 7  | V  | 8  | 929.5784       | 465.2931        |
| 705.4299       | 8  | V  | 7  | 830.5100       | 415.7589        |
| 833.5249       | 9  | K  | 6  | 731.4416       | 366.2247        |
| 961.6199       | 10 | K  | 5  | 603.3466       | 302.1772        |
| 1089.6784      | 11 | Q  | 4  | 475.2516       | 238.1297        |
| 1218.7210      | 12 | E  | 3  | 347.1931       | 174.1004        |
| 1289.7581      | 13 | R  | 2  | 218.1505       | 109.5791        |
|                | 14 | K  | 1  | 147.1134       | 74.0606         |

# KHAVSEGTKAVTQYTSSKI

**X-range:**  
 -   
**MassTol:**  **Y-zoom:**   
**MassType:**  
 AVG  MONO  
**Axis:**  
 1  2  
**Label:**  
 I  M  -  
**Ions:**  
a  +  2+  3+  
b  +  2+  3+  
c  +  2+  3+  
x  +  2+  3+  
Y  +  2+  3+  
z  +  2+  3+  
 hide H<sub>2</sub>O/NH<sub>3</sub>  
**zoom** 112-122

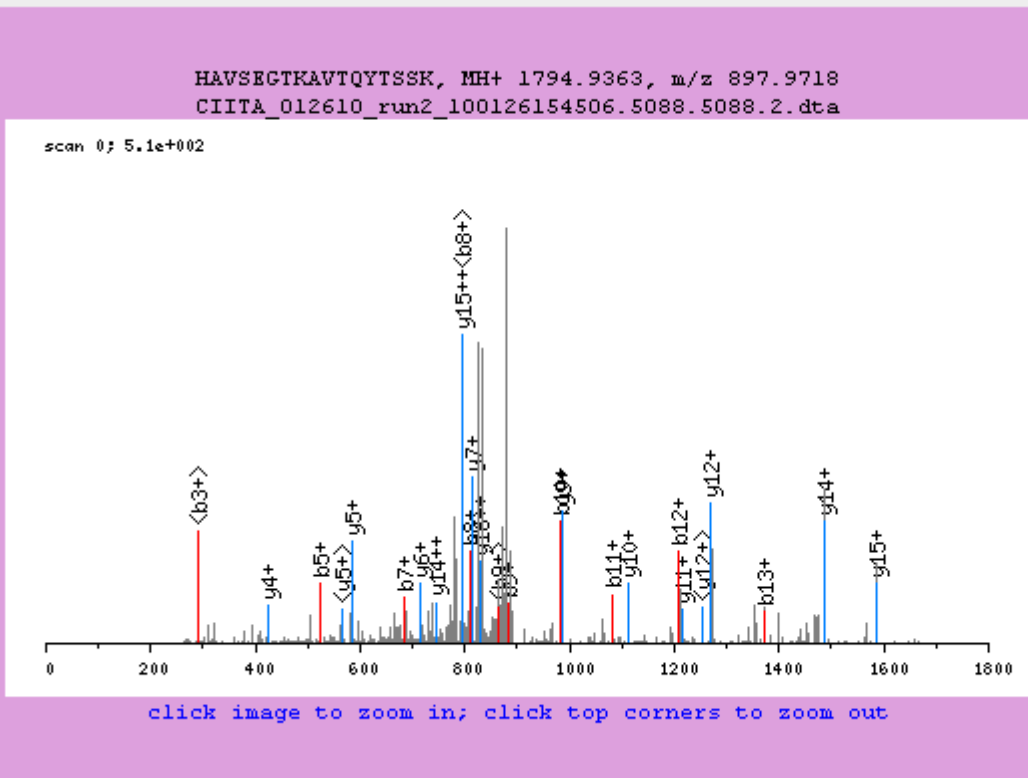

| b <sup>+</sup> | #  | AA | #  | y <sup>+</sup> | y <sup>2+</sup> |
|----------------|----|----|----|----------------|-----------------|
| 138.1472       | 1  | H  | 17 |                |                 |
| 209.2251       | 2  | R  | 16 | 1657.7970      | 829.4025        |
| 308.3562       | 3  | V  | 15 | 1586.7191      | 793.8635        |
| 395.4335       | 4  | S  | 14 | 1487.5881      | 744.2980        |
| 524.5475       | 5  | E  | 13 | 1400.5108      | 700.7594        |
| 581.5988       | 6  | G  | 12 | 1271.3968      | 636.2024        |
| 682.7027       | 7  | T  | 11 | 1214.3455      | 607.6767        |
| 810.8749       | 8  | K  | 10 | 1113.2416      | 557.1248        |
| 881.9528       | 9  | R  | 9  | 985.0693       | 493.0386        |
| 981.0839       | 10 | V  | 8  | 913.9914       | 457.4997        |
| 1082.1878      | 11 | T  | 7  | 814.8603       | 407.9341        |
| 1210.3170      | 12 | Q  | 6  | 713.7565       | 357.3822        |
| 1373.4903      | 13 | Y  | 5  | 585.6272       | 293.3176        |
| 1474.5941      | 14 | T  | 4  | 422.4540       | 211.7310        |
| 1561.6714      | 15 | S  | 3  | 321.3501       | 161.1790        |
| 1648.7487      | 16 | S  | 2  | 234.2728       | 117.6404        |
|                | 17 | K  | 1  | 147.1955       | 74.1017         |

# LRQKAEADKNDKAVKDLV

**X-range:**  
 -

**MassTol:** **Y-zoom:**

**MassType:**  
 AVG  MONO

**Axis:**  
 1  2

**Label:**  
 I  M  -

**Ions:**

a  +  2+  3+

b  +  2+  3+

c  +  2+  3+

x  +  2+  3+

y  +  2+  3+

z  +  2+  3+

hide H<sub>2</sub>O/NH<sub>3</sub>

zoom 112-122

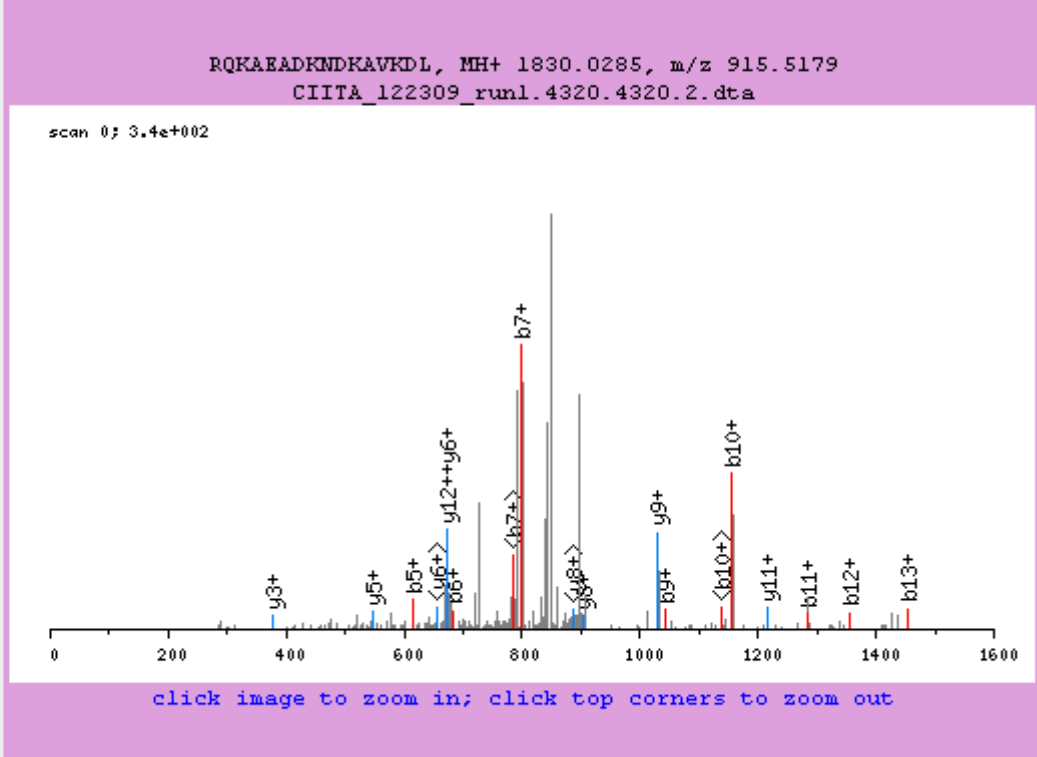

| b <sup>+</sup> | #  | AA | #  | y <sup>+</sup> | y <sup>2+</sup> |
|----------------|----|----|----|----------------|-----------------|
| 157.1936       | 1  | R  | 16 |                |                 |
| 285.3228       | 2  | Q  | 15 | 1673.8428      | 837.4254        |
| 413.4951       | 3  | K  | 14 | 1545.7136      | 773.3607        |
| 484.5730       | 4  | R  | 13 | 1417.5413      | 709.2746        |
| 613.6870       | 5  | E  | 12 | 1346.4634      | 673.7357        |
| 684.7649       | 6  | R  | 11 | 1217.3494      | 609.1787        |
| 799.8523       | 7  | D  | 10 | 1146.2715      | 573.6397        |
| 928.0246       | 8  | K  | 9  | 1031.1841      | 516.0960        |
| 1042.1272      | 9  | N  | 8  | 903.0118       | 452.0099        |
| 1157.2146      | 10 | D  | 7  | 788.9092       | 394.9586        |
| 1285.3869      | 11 | K  | 6  | 673.8218       | 337.4149        |
| 1356.4648      | 12 | R  | 5  | 545.6495       | 273.3287        |
| 1455.5959      | 13 | V  | 4  | 474.5716       | 237.7898        |
| 1583.7681      | 14 | K  | 3  | 375.4405       | 188.2242        |
| 1698.8555      | 15 | D  | 2  | 247.2683       | 124.1381        |
|                | 16 | L  | 1  | 132.1809       | 66.5944         |

# NWDDMEKIWHHTFY

**X-range:**  
 -

**MassTol: Y-zoom:**

**MassType:**  
 AVG  MONO

**Axis:**  
 1  2

**Label:**  
 I  M  -

**Ions:**

a  +  2+  3+

b  +  2+  3+

c  +  2+  3+

x  +  2+  3+

Y  +  2+  3+

z  +  2+  3+

hide H<sub>2</sub>O/NH<sub>3</sub>

zoom 112-122

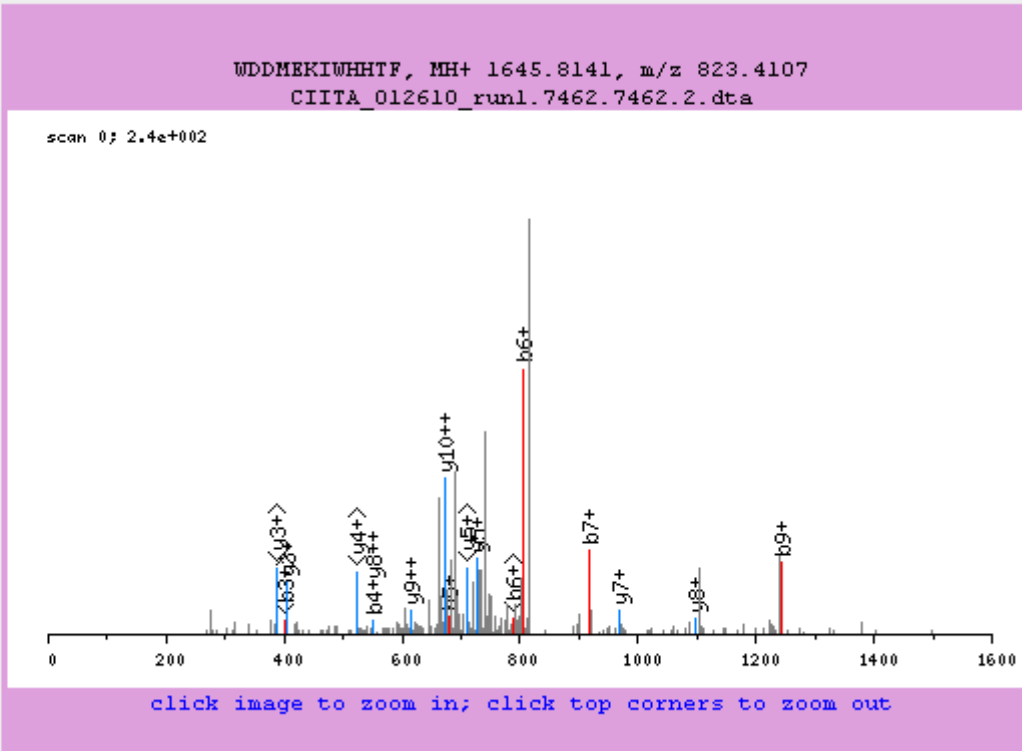

| b <sup>+</sup> | #  | AA | #  | y <sup>+</sup> | y <sup>2+</sup> |
|----------------|----|----|----|----------------|-----------------|
| 187.2178       | 1  | W  | 12 |                |                 |
| 302.3052       | 2  | D  | 11 | 1459.6042      | 730.3061        |
| 417.3926       | 3  | D  | 10 | 1344.5168      | 672.7624        |
| 548.5887       | 4  | M  | 9  | 1229.4294      | 615.2187        |
| 677.7027       | 5  | E  | 8  | 1098.2333      | 549.6206        |
| 805.8750       | 6  | K  | 7  | 969.1193       | 485.0636        |
| 919.0326       | 7  | I  | 6  | 840.9471       | 420.9775        |
| 1105.2425      | 8  | W  | 5  | 727.7894       | 364.3987        |
| 1242.3818      | 9  | H  | 4  | 541.5795       | 271.2937        |
| 1379.5211      | 10 | H  | 3  | 404.4402       | 202.7241        |
| 1480.6249      | 11 | T  | 2  | 267.3010       | 134.1545        |
|                | 12 | F  | 1  | 166.1971       | 83.6025         |

# FNVINGGSHAGNKLAMQEFM

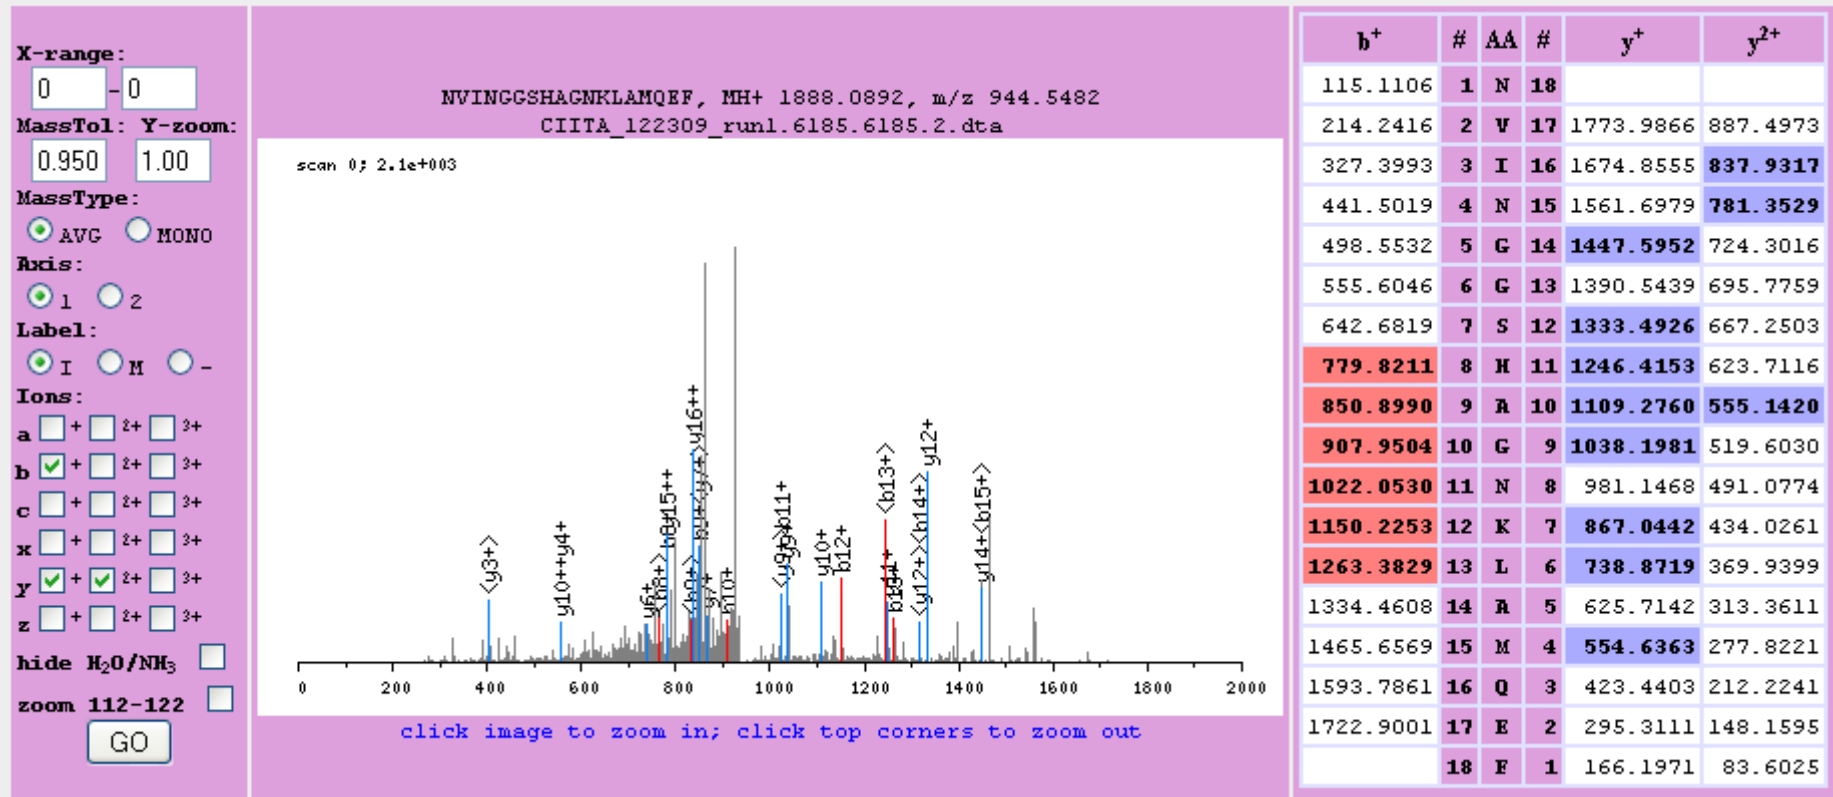

# EFKANAECTSGSNVKIVKVKKE

X-range:

0 - 0

MassTol: Y-zoom:

0.950 1.00

MassType:

AVG  MONO

Axis:

1  2

Label:

I  M  -

Ions:

a  +  2+  3+

b  +  2+  3+

c  +  2+  3+

x  +  2+  3+

y  +  2+  3+

z  +  2+  3+

hide H<sub>2</sub>O/NH<sub>3</sub>

zoom 112-122

GO

EFKANAECTSGSNVKIVKVKKE, MH+ 2306.6804, m/z 1153.8438  
 CIITA\_122309\_run2.4923.4923.2.dta

scan 0; 8.7e+002

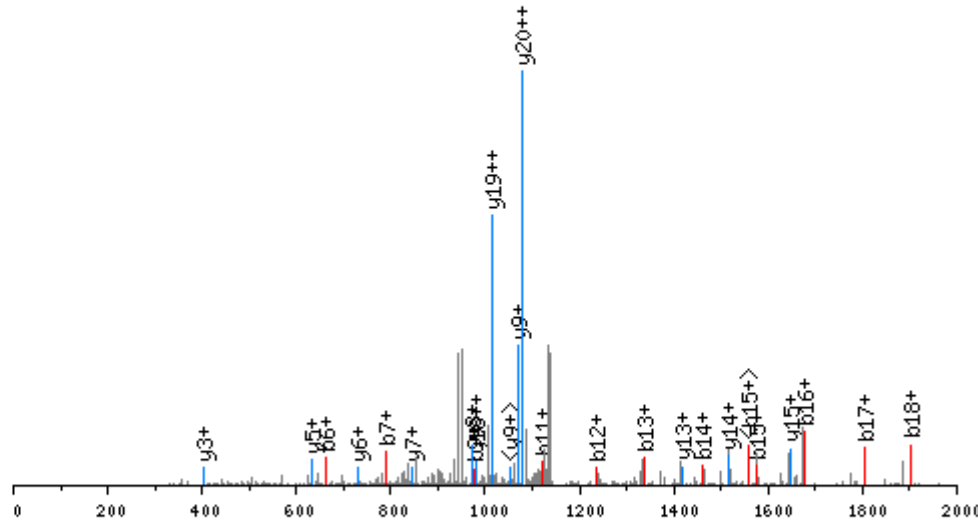

click image to zoom in; click top corners to zoom out

| b <sup>+</sup> | #  | AA | #  | y <sup>+</sup> | y <sup>2+</sup> |
|----------------|----|----|----|----------------|-----------------|
| 148.1818       | 1  | F  | 21 |                |                 |
| 276.3541       | 2  | K  | 20 | 2159.5066      | 1080.2572       |
| 347.4320       | 3  | R  | 19 | 2031.3343      | 1016.1711       |
| 461.5346       | 4  | N  | 18 | 1960.2564      | 980.6322        |
| 532.6125       | 5  | R  | 17 | 1846.1537      | 923.5808        |
| 661.7265       | 6  | E  | 16 | 1775.0758      | 888.0419        |
| 789.8988       | 7  | K  | 15 | 1645.9619      | 823.4849        |
| 891.0027       | 8  | T  | 14 | 1517.7896      | 759.3988        |
| 978.0800       | 9  | S  | 13 | 1416.6857      | 708.8468        |
| 1035.1313      | 10 | G  | 12 | 1329.6084      | 665.3082        |
| 1122.2086      | 11 | S  | 11 | 1272.5571      | 636.7825        |
| 1236.3112      | 12 | N  | 10 | 1185.4798      | 593.2439        |
| 1335.4423      | 13 | V  | 9  | 1071.3771      | 536.1925        |
| 1463.6146      | 14 | K  | 8  | 972.2461       | 486.6270        |
| 1576.7722      | 15 | I  | 7  | 844.0738       | 422.5409        |
| 1675.9033      | 16 | V  | 6  | 730.9162       | 365.9620        |
| 1804.0755      | 17 | K  | 5  | 631.7851       | 316.3965        |
| 1903.2066      | 18 | V  | 4  | 503.6128       | 252.3104        |
| 2031.3789      | 19 | K  | 3  | 404.4818       | 202.7448        |
| 2159.5512      | 20 | K  | 2  | 276.3095       | 138.6587        |
|                | 21 | E  | 1  | 148.1372       | 74.5726         |

# KVKSLNDITAKERFSPLTTNLI

X-range:

0 - 0

MassTol: Y-zoom:

0.950 1.00

MassType:

AVG  MOMO

Axis:

1  2

Label:

I  M  -

Ions:

a  +  2+  3+

b  +  2+  3+

c  +  2+  3+

x  +  2+  3+

y  +  2+  3+

z  +  2+  3+

hide H<sub>2</sub>O/NH<sub>3</sub>

zoom 112-122

GO

KVKSLNDITAKERFSPLTTNL, MH+ 2248.5549, m/z 1124.7811  
CIITA\_012610\_run1.6988.6988.2.dta

scan 0; 1.6e+003

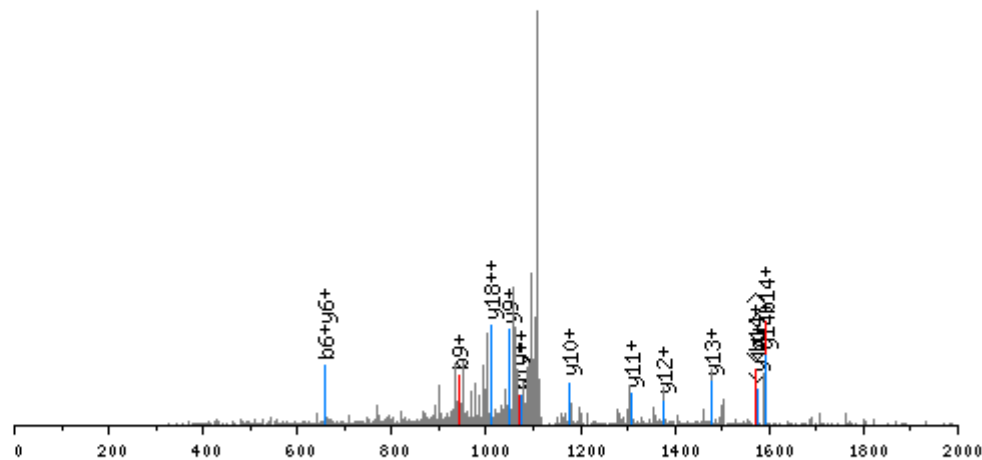

click image to zoom in; click top corners to zoom out

| b <sup>+</sup> | #  | AA | #  | y <sup>+</sup> | y <sup>2+</sup> |
|----------------|----|----|----|----------------|-----------------|
| 100.1390       | 1  | V  | 20 |                |                 |
| 228.3113       | 2  | K  | 19 | 2149.4239      | 1075.2159       |
| 315.3886       | 3  | S  | 18 | 2021.2516      | 1011.1298       |
| 428.5462       | 4  | L  | 17 | 1934.1743      | 967.5911        |
| 542.6489       | 5  | N  | 16 | 1821.0166      | 911.0123        |
| 657.7363       | 6  | D  | 15 | 1706.9140      | 853.9610        |
| 770.8939       | 7  | I  | 14 | 1591.8266      | 796.4173        |
| 871.9978       | 8  | T  | 13 | 1478.6690      | 739.8384        |
| 943.0757       | 9  | R  | 12 | 1377.5651      | 689.2865        |
| 1071.2480      | 10 | K  | 11 | 1306.4872      | 653.7476        |
| 1200.3619      | 11 | E  | 10 | 1178.3149      | 589.6614        |
| 1356.5476      | 12 | R  | 9  | 1049.2009      | 525.1044        |
| 1503.7215      | 13 | F  | 8  | 893.0152       | 447.0116        |
| 1590.7988      | 14 | S  | 7  | 745.8414       | 373.4247        |
| 1687.9140      | 15 | P  | 6  | 658.7641       | 329.8860        |
| 1801.0716      | 16 | L  | 5  | 561.6489       | 281.3284        |
| 1902.1755      | 17 | T  | 4  | 448.4913       | 224.7496        |
| 2003.2794      | 18 | T  | 3  | 347.3874       | 174.1977        |
| 2117.3820      | 19 | N  | 2  | 246.2835       | 123.6457        |
|                | 20 | L  | 1  | 132.1809       | 66.5944         |



# LIKEGDIVKRTGAIVDVPVGEELL

X-range:  -

MassTol:  Y-zoom:

MassType:  AVG  MONO

Axis:  1  2

Label:  I  M  -

Ions:

a  +  2+  3+

b  +  2+  3+

c  +  2+  3+

x  +  2+  3+

y  +  2+  3+

z  +  2+  3+

hide H<sub>2</sub>O/NH<sub>3</sub>

zoom 112-122

LIKEGDIVKRTGAIVDVPVGEEL, MH+ 2338.6759, m/z 1169.8416  
 CIITA\_012610\_run1.7121.7121.2.dta

scan #: 3.7e+002

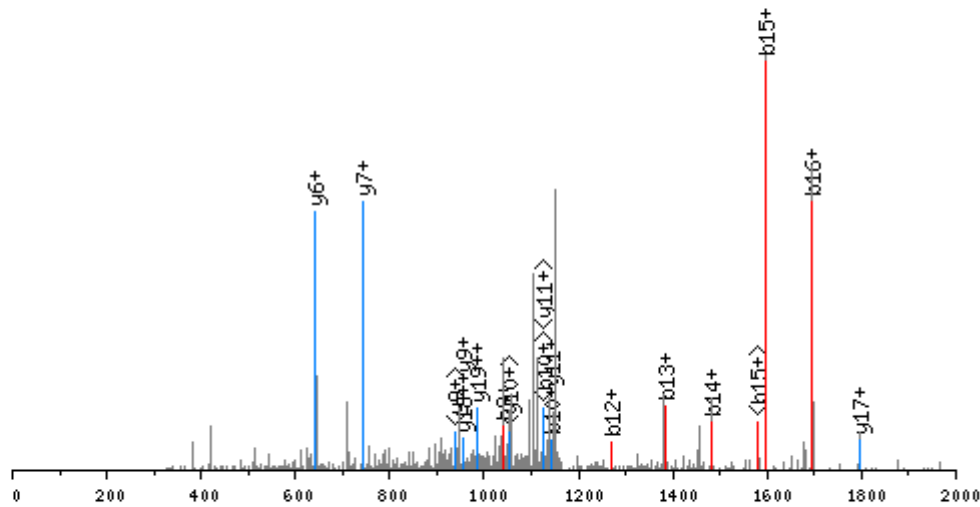

click image to zoom in; click top corners to zoom out

| b <sup>+</sup> | #  | AA | #  | y <sup>+</sup> | y <sup>2+</sup> |
|----------------|----|----|----|----------------|-----------------|
| 114.1656       | 1  | I  | 22 |                |                 |
| 242.3379       | 2  | K  | 21 | 2225.5183      | 1113.2631       |
| 371.4518       | 3  | E  | 20 | 2097.3460      | 1049.1770       |
| 428.5032       | 4  | G  | 19 | 1968.2320      | 984.6200        |
| 543.5906       | 5  | D  | 18 | 1911.1807      | 956.0943        |
| 656.7482       | 6  | I  | 17 | 1796.0933      | 898.5506        |
| 755.8793       | 7  | V  | 16 | 1682.9357      | 841.9718        |
| 884.0515       | 8  | K  | 15 | 1583.8046      | 792.4063        |
| 1040.2372      | 9  | R  | 14 | 1455.6323      | 728.3201        |
| 1141.3411      | 10 | T  | 13 | 1299.4466      | 650.2273        |
| 1198.3924      | 11 | G  | 12 | 1198.3428      | 599.6753        |
| 1269.4703      | 12 | R  | 11 | 1141.2914      | 571.1497        |
| 1382.6280      | 13 | I  | 10 | 1070.2135      | 535.6107        |
| 1481.7590      | 14 | V  | 9  | 957.0559       | 479.0319        |
| 1596.8464      | 15 | D  | 8  | 857.9248       | 429.4664        |
| 1695.9775      | 16 | V  | 7  | 742.8374       | 371.9227        |
| 1793.0927      | 17 | P  | 6  | 643.7064       | 322.3572        |
| 1892.2237      | 18 | V  | 5  | 546.5912       | 273.7996        |
| 1949.2750      | 19 | G  | 4  | 447.4601       | 224.2340        |
| 2078.3890      | 20 | E  | 3  | 390.4088       | 195.7084        |
| 2207.5030      | 21 | E  | 2  | 261.2948       | 131.1514        |
|                | 22 | L  | 1  | 132.1809       | 66.5944         |

# YGNKADIISTVEFNH

**X-range:**  -   
**MassTol:**  **Y-zoom:**   
**MassType:**  
 AVG  MONO  
**Axis:**  
 1  2  
**Label:**  
 I  M  -  
**Ions:**  
a  +  2+  3+  
b  +  2+  3+  
c  +  2+  3+  
x  +  2+  3+  
y  +  2+  3+  
z  +  2+  3+  
hide H<sub>2</sub>O/NH<sub>3</sub>   
zoom

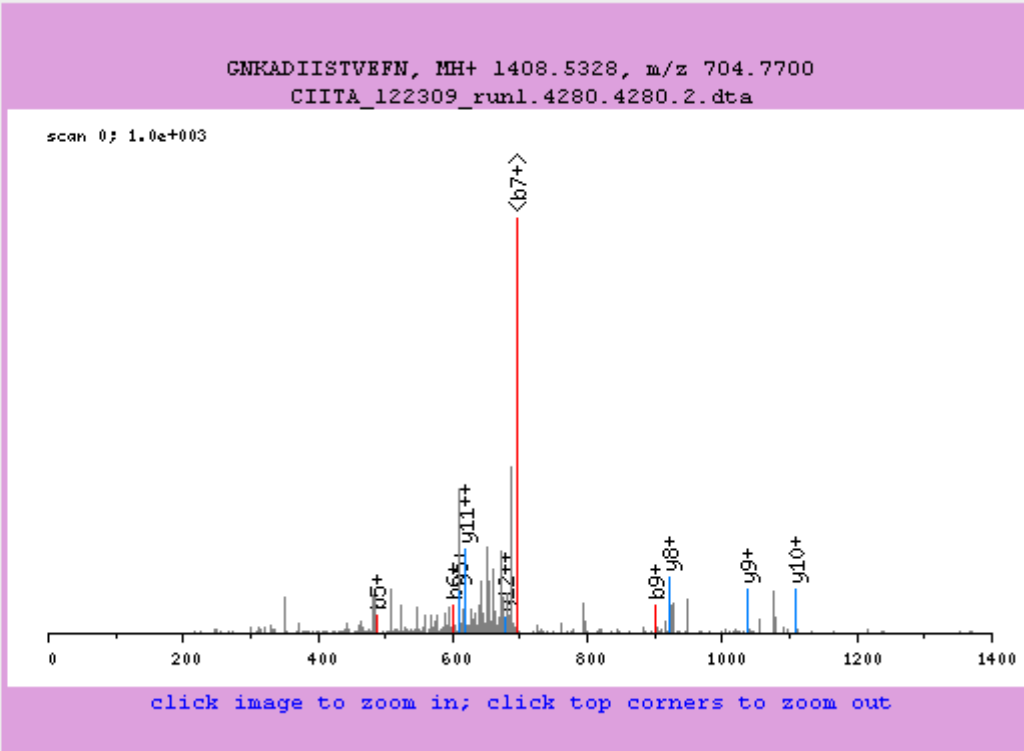

| b <sup>+</sup> | #  | AA | #  | y <sup>+</sup> | y <sup>2+</sup> |
|----------------|----|----|----|----------------|-----------------|
| 58.0593        | 1  | G  | 13 |                |                 |
| 172.1619       | 2  | N  | 12 | 1351.4814      | 676.2447        |
| 300.3342       | 3  | K  | 11 | 1237.3788      | 619.1934        |
| 371.4121       | 4  | R  | 10 | 1109.2065      | 555.1072        |
| 486.4995       | 5  | D  | 9  | 1038.1286      | 519.5683        |
| 599.6571       | 6  | I  | 8  | 923.0412       | 462.0246        |
| 712.8148       | 7  | I  | 7  | 809.8836       | 405.4458        |
| 799.8921       | 8  | S  | 6  | 696.7259       | 348.8669        |
| 900.9959       | 9  | T  | 5  | 609.6486       | 305.3283        |
| 1000.1270      | 10 | V  | 4  | 508.5448       | 254.7763        |
| 1129.2410      | 11 | E  | 3  | 409.4137       | 205.2108        |
| 1276.4148      | 12 | F  | 2  | 280.2997       | 140.6538        |
|                | 13 | N  | 1  | 133.1259       | 67.0669         |

# EPKTTDSFLEIELAHLANGTLNPPYCVLW

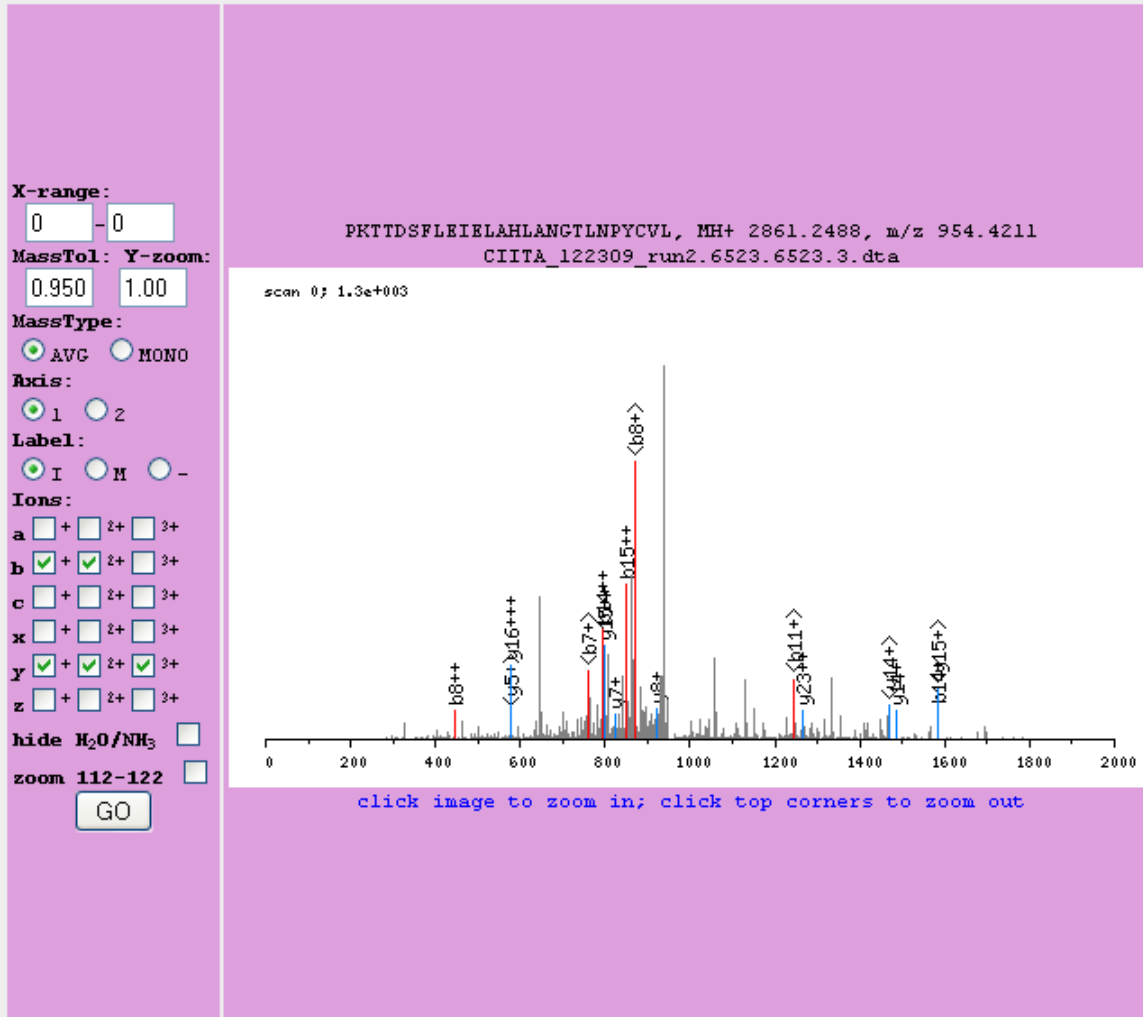

| b <sup>+</sup> | b <sup>2+</sup> | #  | AA | #  | y <sup>+</sup> | y <sup>2+</sup> | y <sup>3+</sup> |
|----------------|-----------------|----|----|----|----------------|-----------------|-----------------|
| 98.1231        | 49.5655         | 1  | P  | 26 |                |                 |                 |
| 226.2954       | 113.6517        | 2  | K  | 25 | 2764.1336      | 1382.5708       | 922.0498        |
| 327.3993       | 164.2036        | 3  | T  | 24 | 2635.9613      | 1318.4846       | 879.3257        |
| 428.5032       | 214.7556        | 4  | T  | 23 | 2534.8574      | 1267.9327       | 845.6244        |
| 543.5906       | 272.2992        | 5  | D  | 22 | 2433.7535      | 1217.3807       | 811.9231        |
| 630.6679       | 315.8379        | 6  | S  | 21 | 2318.6661      | 1159.8370       | 773.5607        |
| 777.8417       | 389.4248        | 7  | F  | 20 | 2231.5888      | 1116.2984       | 744.5349        |
| 890.9994       | 446.0036        | 8  | L  | 19 | 2084.4150      | 1042.7115       | 695.4770        |
| 1020.1133      | 510.5606        | 9  | E  | 18 | 1971.2573      | 986.1326        | 657.7577        |
| 1133.2710      | 567.1395        | 10 | I  | 17 | 1842.1434      | 921.5757        | 614.7197        |
| 1262.3850      | 631.6965        | 11 | E  | 16 | 1728.9857      | 864.9968        | 577.0005        |
| 1375.5426      | 688.2753        | 12 | L  | 15 | 1599.8717      | 800.4398        | 533.9625        |
| 1446.6205      | 723.8142        | 13 | A  | 14 | 1486.7141      | 743.8610        | 496.2433        |
| 1583.7598      | 792.3839        | 14 | H  | 13 | 1415.6362      | 708.3221        | 472.5507        |
| 1696.9174      | 848.9627        | 15 | L  | 12 | 1278.4969      | 639.7524        | 426.8376        |
| 1767.9953      | 884.5016        | 16 | A  | 11 | 1165.3393      | 583.1736        | 389.1184        |
| 1882.0980      | 941.5530        | 17 | N  | 10 | 1094.2614      | 547.6347        | 365.4258        |
| 1939.1493      | 970.0786        | 18 | G  | 9  | 980.1587       | 490.5833        | 327.3915        |
| 2040.2532      | 1020.6306       | 19 | T  | 8  | 923.1074       | 462.0577        | 308.3744        |
| 2153.4108      | 1077.2094       | 20 | L  | 7  | 822.0035       | 411.5057        | 274.6731        |
| 2267.5134      | 1134.2607       | 21 | N  | 6  | 708.8459       | 354.9269        | 236.9539        |
| 2364.6286      | 1182.8183       | 22 | P  | 5  | 594.7433       | 297.8756        | 198.9197        |
| 2527.8019      | 1264.4049       | 23 | Y  | 4  | 497.6281       | 249.3180        | 166.5480        |
| 2630.9448      | 1315.9764       | 24 | C  | 3  | 334.4548       | 167.7314        | 112.1569        |
| 2730.0758      | 1365.5419       | 25 | V  | 2  | 231.3119       | 116.1599        | 77.7759         |
|                |                 | 26 | L  | 1  | 132.1809       | 66.5944         | 44.7322         |

# RTYAGGTASATKVSASSGATSKS

**X-range:**  
 -   
**MassTol:**  **Y-zoom:**   
**MassType:**  
 AVG  MONO  
**Axis:**  
 1  2  
**Label:**  
 I  M  -  
**Ions:**  
a  +  2+  3+  
b  +  2+  3+  
c  +  2+  3+  
x  +  2+  3+  
y  +  2+  3+  
z  +  2+  3+  
hide H<sub>2</sub>O/NH<sub>3</sub>   
zoom 112-122

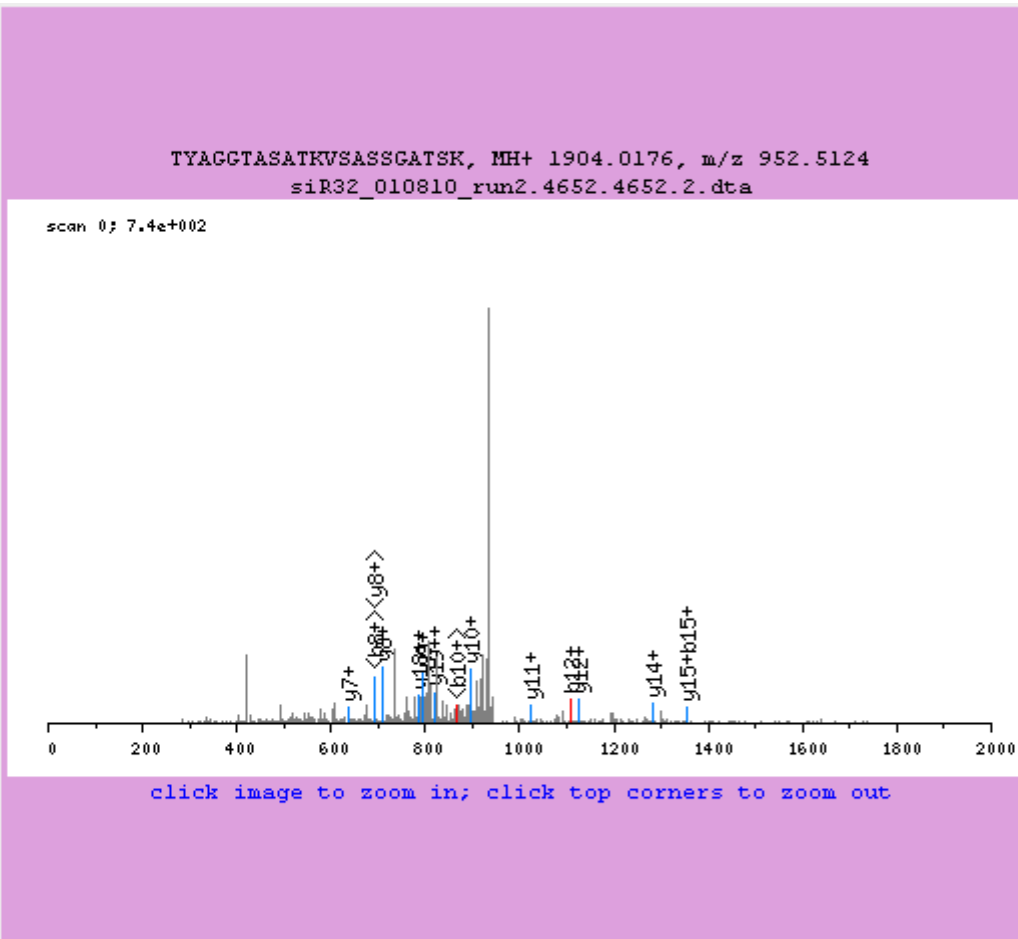

| b <sup>+</sup> | #  | AA | #  | y <sup>+</sup> | y <sup>2+</sup> |
|----------------|----|----|----|----------------|-----------------|
| 102.1118       | 1  | T  | 21 |                |                 |
| 265.2851       | 2  | Y  | 20 | 1802.9137      | 901.9608        |
| 336.3630       | 3  | R  | 19 | 1639.7404      | 820.3742        |
| 393.4143       | 4  | G  | 18 | 1568.6625      | 784.8352        |
| 450.4656       | 5  | G  | 17 | 1511.6112      | 756.3096        |
| 551.5695       | 6  | T  | 16 | 1454.5599      | 727.7839        |
| 622.6474       | 7  | R  | 15 | 1353.4560      | 677.2320        |
| 709.7247       | 8  | S  | 14 | 1282.3781      | 641.6930        |
| 780.8026       | 9  | R  | 13 | 1195.3008      | 598.1544        |
| 881.9065       | 10 | T  | 12 | 1124.2229      | 562.6154        |
| 1010.0788      | 11 | K  | 11 | 1023.1190      | 512.0635        |
| 1109.2098      | 12 | V  | 10 | 894.9468       | 447.9773        |
| 1196.2871      | 13 | S  | 9  | 795.8157       | 398.4118        |
| 1267.3650      | 14 | R  | 8  | 708.7384       | 354.8732        |
| 1354.4423      | 15 | S  | 7  | 637.6605       | 319.3342        |
| 1441.5196      | 16 | S  | 6  | 550.5832       | 275.7956        |
| 1498.5709      | 17 | G  | 5  | 463.5059       | 232.2569        |
| 1569.6488      | 18 | R  | 4  | 406.4546       | 203.7313        |
| 1670.7527      | 19 | T  | 3  | 335.3767       | 168.1923        |
| 1757.8300      | 20 | S  | 2  | 234.2728       | 117.6404        |
|                | 21 | K  | 1  | 147.1955       | 74.1017         |

# RRLRPGTGCCHPSLPF

**X-range:**  
 -

**MassTol:**  **Y-zoom:**

**MassType:**  
 AVG  MONO

**Axis:**  
 1  2

**Label:**  
 I  M  -

**Ions:**

a  +  2+  3+

b  +  2+  3+

c  +  2+  3+

x  +  2+  3+

y  +  2+  3+

z  +  2+  3+

hide H<sub>2</sub>O/NH<sub>3</sub>

zoom 112-122

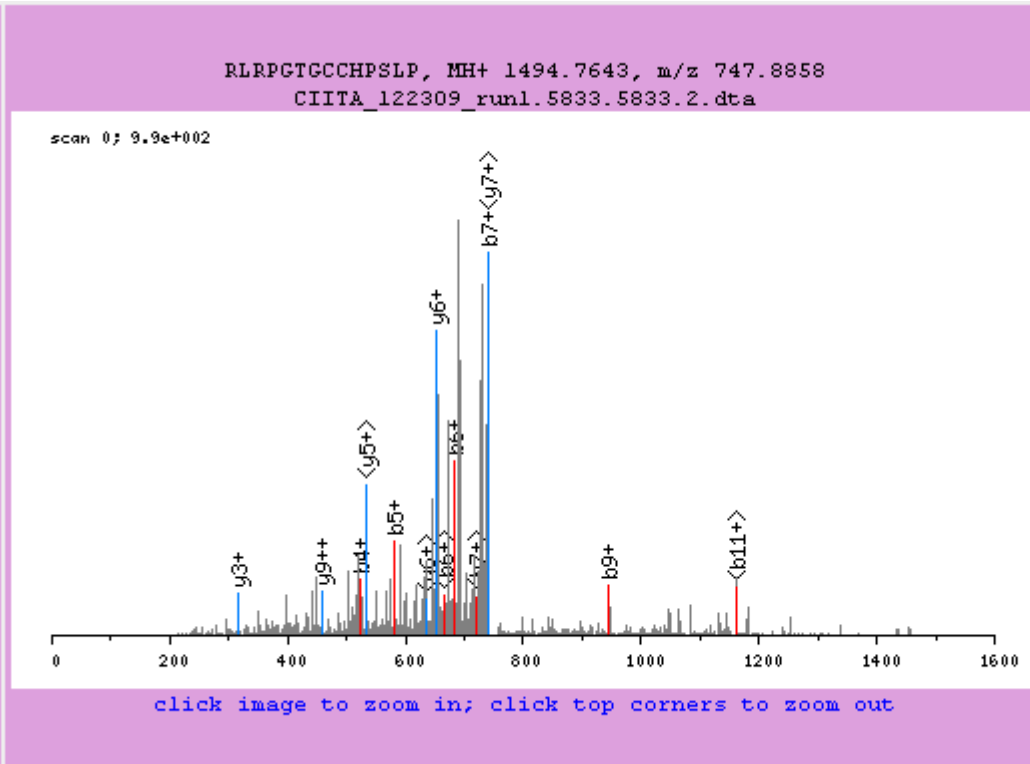

| b <sup>+</sup> | #  | AA | #  | y <sup>+</sup> | y <sup>2+</sup> |
|----------------|----|----|----|----------------|-----------------|
| 157.1936       | 1  | R  | 14 |                |                 |
| 270.3513       | 2  | L  | 13 | 1338.5786      | 669.7933        |
| 426.5369       | 3  | R  | 12 | 1225.4210      | 613.2145        |
| 523.6521       | 4  | P  | 11 | 1069.2353      | 535.1216        |
| 580.7034       | 5  | G  | 10 | 972.1201       | 486.5640        |
| 681.8073       | 6  | T  | 9  | 915.0688       | 458.0384        |
| 738.8586       | 7  | G  | 8  | 813.9649       | 407.4864        |
| 842.0015       | 8  | C  | 7  | 756.9136       | 378.9608        |
| 945.1444       | 9  | C  | 6  | 653.7707       | 327.3893        |
| 1082.2837      | 10 | H  | 5  | 550.6278       | 275.8179        |
| 1179.3989      | 11 | P  | 4  | 413.4885       | 207.2482        |
| 1266.4762      | 12 | S  | 3  | 316.3733       | 158.6906        |
| 1379.6338      | 13 | L  | 2  | 229.2960       | 115.1520        |
|                | 14 | P  | 1  | 116.1384       | 58.5732         |

# YLKSHHGEHERPEFI

X-range:  -

MassTol:  Y-zoom:

MassType:  AVG  MONO

Axis:  1  2

Label:  I  M  -

Ions:

a  +  2+  3+

b  +  2+  3+

c  +  2+  3+

x  +  2+  3+

y  +  2+  3+

z  +  2+  3+

hide H<sub>2</sub>O/NH<sub>3</sub>

zoom 112-122

LKSHHGEHERPEF, MH+ 1603.7163, m/z 802.3618  
 CIITA\_012610\_run1.4936.4936.2.dta

scan 0; 6.1e+002

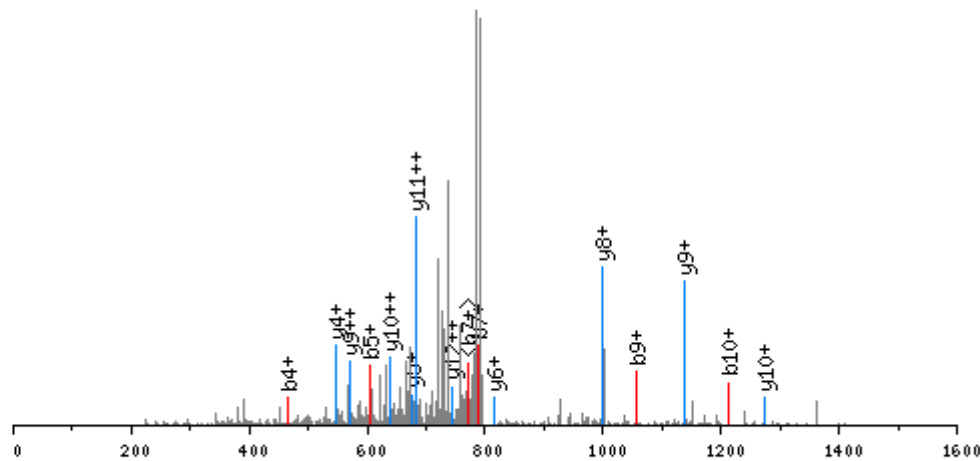

click image to zoom in; click top corners to zoom out

| b <sup>+</sup> | #  | AA | #  | y <sup>+</sup> | y <sup>2+</sup> |
|----------------|----|----|----|----------------|-----------------|
| 114.1656       | 1  | L  | 13 |                |                 |
| 242.3379       | 2  | K  | 12 | 1490.5586      | 745.7833        |
| 329.4152       | 3  | S  | 11 | 1362.3863      | 681.6971        |
| 466.5544       | 4  | H  | 10 | 1275.3090      | 638.1585        |
| 603.6937       | 5  | H  | 9  | 1138.1698      | 569.5889        |
| 660.7450       | 6  | G  | 8  | 1001.0305      | 501.0192        |
| 789.8590       | 7  | E  | 7  | 943.9792       | 472.4936        |
| 926.9983       | 8  | H  | 6  | 814.8652       | 407.9366        |
| 1056.1123      | 9  | E  | 5  | 677.7259       | 339.3669        |
| 1212.2980      | 10 | R  | 4  | 548.6119       | 274.8099        |
| 1309.4131      | 11 | P  | 3  | 392.4262       | 196.7171        |
| 1438.5271      | 12 | E  | 2  | 295.3111       | 148.1595        |
|                | 13 | F  | 1  | 166.1971       | 83.6025         |

# KENLDPSNLMPPPNT

X-range:  -

MassTol:  Y-zoom:

MassType:  AVG  MONO

Axis:  1  2

Label:  I  M  -

Ions:

a  +  2+  3+

b  +  2+  3+

c  +  2+  3+

x  +  2+  3+

y  +  2+  3+

z  +  2+  3+

hide H<sub>2</sub>O/NH<sub>3</sub>

zoom 112-122

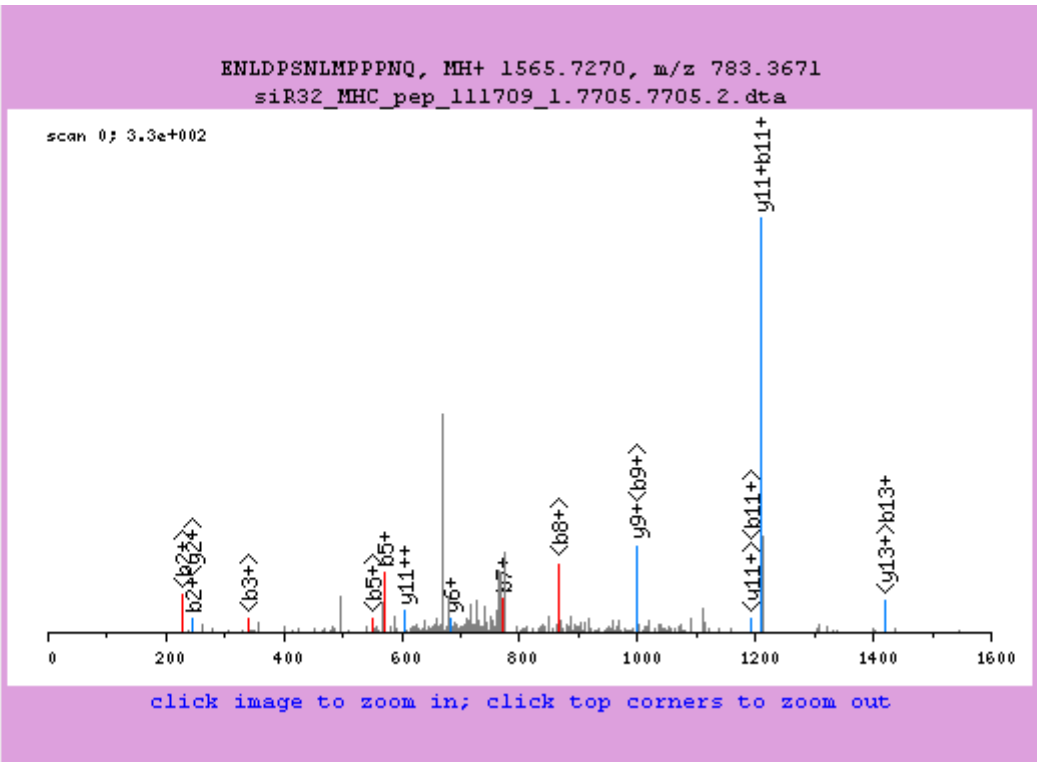

| b <sup>+</sup> | #  | AA | #  | y <sup>+</sup> | y <sup>2+</sup> |
|----------------|----|----|----|----------------|-----------------|
| 130.0504       | 1  | E  | 14 |                |                 |
| 244.0933       | 2  | N  | 13 | 1436.6844      | 718.8461        |
| 357.1774       | 3  | L  | 12 | 1322.6415      | 661.8246        |
| 472.2044       | 4  | D  | 11 | 1209.5574      | 605.2826        |
| 569.2571       | 5  | P  | 10 | 1094.5305      | 547.7691        |
| 656.2891       | 6  | S  | 9  | 997.4777       | 499.2428        |
| 770.3321       | 7  | N  | 8  | 910.4457       | 455.7267        |
| 883.4161       | 8  | L  | 7  | 796.4027       | 398.7053        |
| 1014.4566      | 9  | M  | 6  | 683.3187       | 342.1632        |
| 1111.5094      | 10 | P  | 5  | 552.2782       | 276.6430        |
| 1208.5621      | 11 | P  | 4  | 455.2254       | 228.1166        |
| 1305.6149      | 12 | P  | 3  | 358.1727       | 179.5902        |
| 1419.6578      | 13 | N  | 2  | 261.1199       | 131.0639        |
|                | 14 | Q  | 1  | 147.0770       | 74.0424         |

# FMVIEGKKAQRHETLT

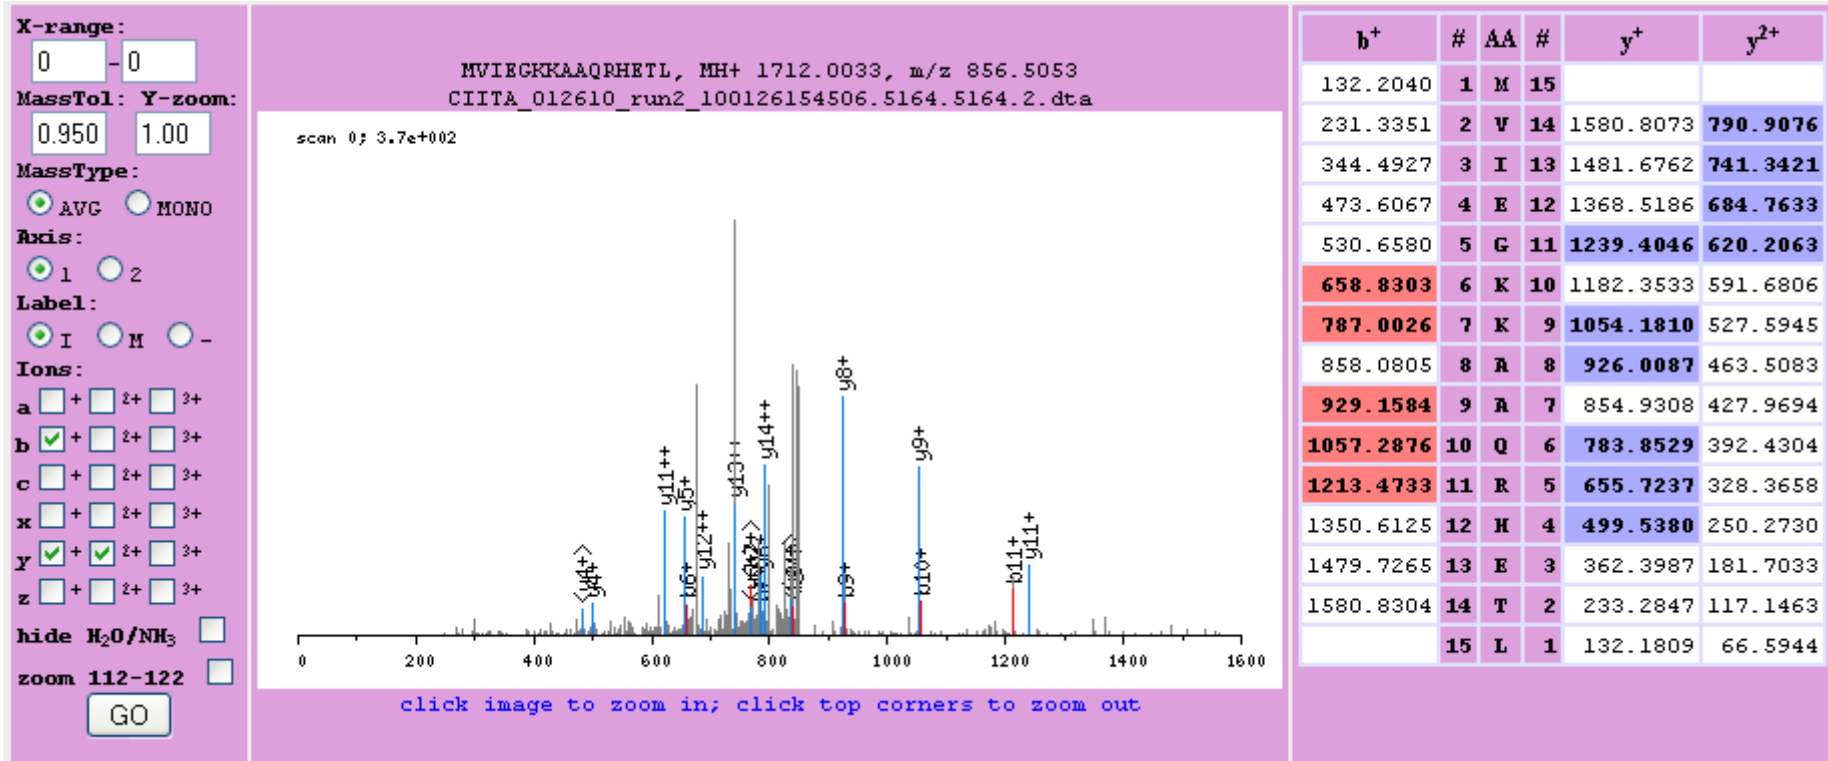



# RTIEKFEKEAAEMGKG

**X-range:**  
 -

**MassTol:**  **Y-zoom:**

**MassType:**  
 AVG  MONO

**Axis:**  
 1  2

**Label:**  
 I  M  -

**Ions:**

a  +  2+  3+

b  +  2+  3+

c  +  2+  3+

x  +  2+  3+

y  +  2+  3+

z  +  2+  3+

hide H<sub>2</sub>O/NH<sub>3</sub>

zoom 112-122

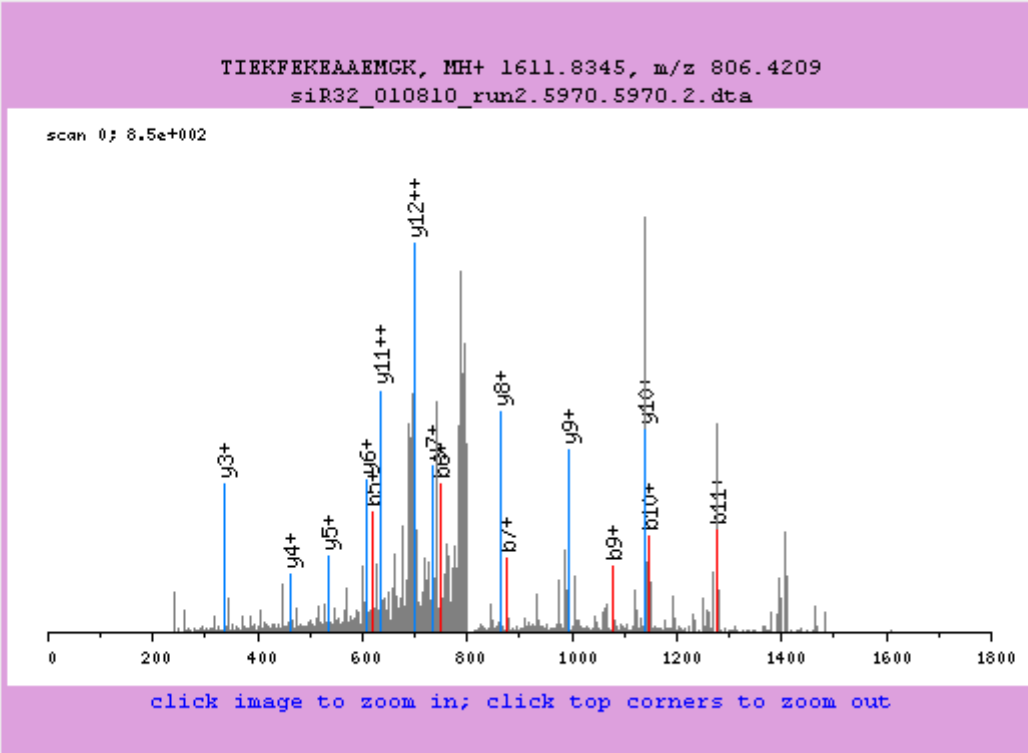

| b <sup>+</sup>   | #  | AA | #  | y <sup>+</sup>   | y <sup>2+</sup> |
|------------------|----|----|----|------------------|-----------------|
| 102.1118         | 1  | T  | 14 |                  |                 |
| 215.2695         | 2  | I  | 13 | 1510.7307        | 755.8693        |
| 344.3834         | 3  | E  | 12 | 1397.5730        | <b>699.2905</b> |
| 472.5557         | 4  | K  | 11 | 1268.4590        | <b>634.7335</b> |
| <b>619.7296</b>  | 5  | F  | 10 | <b>1140.2868</b> | 570.6474        |
| <b>748.8436</b>  | 6  | E  | 9  | <b>993.1129</b>  | 497.0604        |
| <b>877.0158</b>  | 7  | K  | 8  | <b>863.9989</b>  | 432.5034        |
| 1006.1298        | 8  | E  | 7  | <b>735.8266</b>  | 368.4173        |
| <b>1077.2077</b> | 9  | R  | 6  | <b>606.7127</b>  | 303.8603        |
| <b>1148.2856</b> | 10 | R  | 5  | <b>535.6348</b>  | 268.3214        |
| <b>1277.3996</b> | 11 | E  | 4  | <b>464.5569</b>  | 232.7824        |
| 1408.5957        | 12 | M  | 3  | <b>335.4429</b>  | 168.2254        |
| 1465.6470        | 13 | G  | 2  | 204.2468         | 102.6274        |
|                  | 14 | K  | 1  | 147.1955         | 74.1017         |

# LPVGAANFR

**X-range:**  
 -

**MassTol:** **Y-zoom:**

**MassType:**  
 AVG  MONO

**Axis:**  
 1  2

**Label:**  
 I  H  -

**Ions:**

a  +  2+  3+

b  +  2+  3+

c  +  2+  3+

x  +  2+  3+

y  +  2+  3+

z  +  2+  3+

hide H<sub>2</sub>O/NH<sub>3</sub>

zoom 112-122

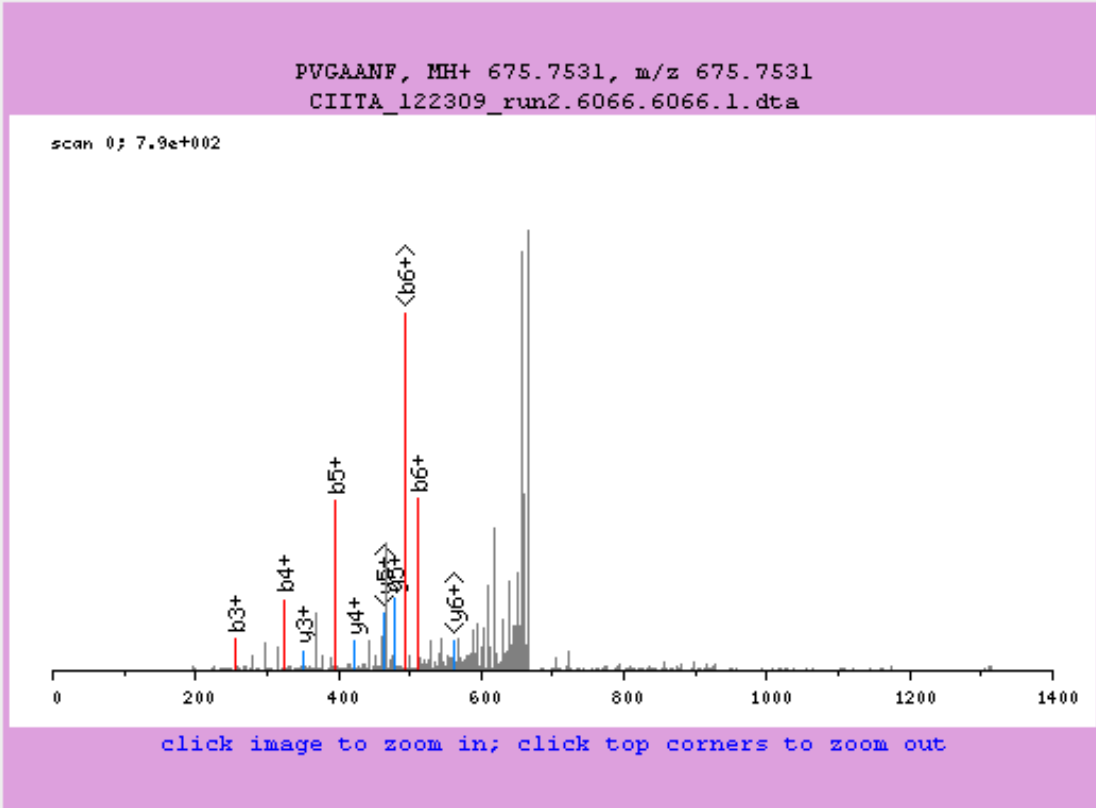

| b <sup>+</sup> | # | AA | # | y <sup>+</sup> |
|----------------|---|----|---|----------------|
| 98.1231        | 1 | P  | 7 |                |
| 197.2542       | 2 | V  | 6 | 578.6379       |
| 254.3055       | 3 | G  | 5 | 479.5068       |
| 325.3834       | 4 | R  | 4 | 422.4555       |
| 396.4613       | 5 | R  | 3 | 351.3776       |
| 510.5639       | 6 | N  | 2 | 280.2997       |
|                | 7 | F  | 1 | 166.1971       |

# FITKMDYPKQTQVSVLPEGGETPLFKQFF

X-range:

0 - 0

MassTol: Y-zoom:

0.950 1.00

MassType:

AVG  MONO

Axis:

1  2

Label:

I  M  -

Ions:

a  +  2+  3+

b  +  2+  3+

c  +  2+  3+

x  +  2+  3+

y  +  2+  3+

z  +  2+  3+

hide H<sub>2</sub>O/NH<sub>3</sub>

zoom 112-122

GO

ITKMDYPKQTQVSVLPEGGETPLFKQF, MH+ 3083.5323, m/z 1028.5156  
CIITA\_012610\_run1.7358.7360.3.dta

scan 0; 1.1e+003

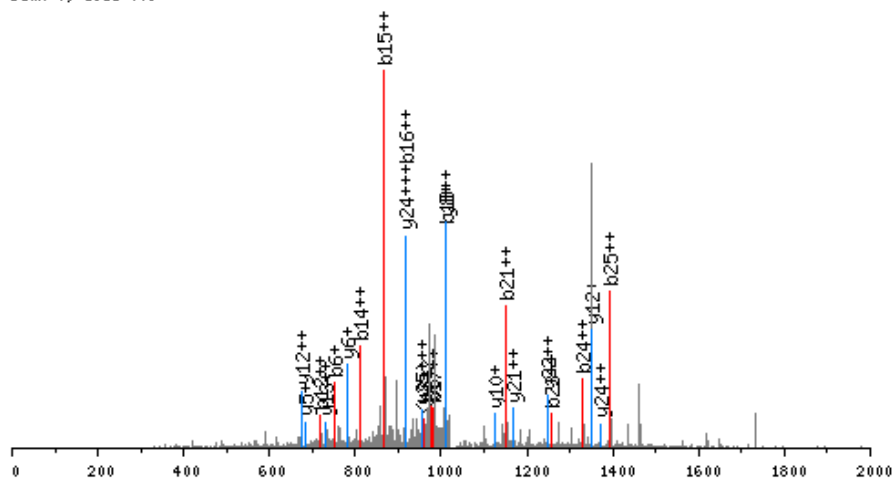

click image to zoom in; click top corners to zoom out

| b <sup>+</sup>  | b <sup>2+</sup>  | #  | AA | #  | y <sup>+</sup>   | y <sup>2+</sup>  | y <sup>3+</sup> |
|-----------------|------------------|----|----|----|------------------|------------------|-----------------|
| 114.1656        | 57.5868          | 1  | I  | 27 |                  |                  |                 |
| 215.2695        | 108.1387         | 2  | T  | 26 | 2970.3746        | 1485.6913        | 990.7968        |
| 343.4417        | 172.2248         | 3  | K  | 25 | 2869.2708        | 1435.1393        | <b>957.0955</b> |
| 474.6378        | 237.8229         | 4  | M  | 24 | 2741.0985        | <b>1371.0532</b> | <b>914.3715</b> |
| 589.7252        | 295.3666         | 5  | D  | 23 | 2609.9024        | 1305.4552        | 870.6394        |
| <b>752.8985</b> | 376.9532         | 6  | Y  | 22 | 2494.8150        | <b>1247.9115</b> | 832.2770        |
| 850.0136        | 425.5108         | 7  | P  | 21 | 2331.6418        | <b>1166.3248</b> | 777.8859        |
| <b>978.1859</b> | 489.5969         | 8  | K  | 20 | 2234.5266        | 1117.7673        | 745.5142        |
| 1106.3151       | 553.6615         | 9  | Q  | 19 | 2106.3543        | 1053.6811        | 702.7901        |
| 1207.4190       | 604.2135         | 10 | T  | 18 | 1978.2251        | 989.6165         | 660.0803        |
| 1335.5482       | 668.2781         | 11 | Q  | 17 | 1877.1212        | 939.0646         | 626.3790        |
| 1434.6793       | <b>717.8436</b>  | 12 | V  | 16 | 1748.9920        | 875.0000         | 583.6693        |
| 1521.7566       | 761.3823         | 13 | S  | 15 | 1649.8609        | 825.4344         | 550.6256        |
| 1620.8877       | <b>810.9478</b>  | 14 | V  | 14 | 1562.7836        | 781.8958         | 521.5998        |
| 1734.0453       | <b>867.5266</b>  | 15 | L  | 13 | 1463.6526        | <b>732.3303</b>  | 488.5561        |
| 1831.1605       | <b>916.0842</b>  | 16 | P  | 12 | <b>1350.4949</b> | <b>675.7514</b>  | 450.8369        |
| 1960.2745       | <b>980.6412</b>  | 17 | E  | 11 | 1253.3797        | 627.1938         | 418.4652        |
| 2017.3258       | <b>1009.1669</b> | 18 | G  | 10 | <b>1124.2658</b> | 562.6369         | 375.4272        |
| 2074.3771       | 1037.6925        | 19 | G  | 9  | 1067.2144        | 534.1112         | 356.4101        |
| 2203.4911       | 1102.2495        | 20 | E  | 8  | <b>1010.1631</b> | 505.5855         | 337.3930        |
| 2304.5950       | <b>1152.8014</b> | 21 | T  | 7  | 881.0491         | 441.0285         | 294.3550        |
| 2401.7101       | 1201.3590        | 22 | P  | 6  | <b>779.9453</b>  | 390.4766         | 260.6537        |
| 2514.8678       | <b>1257.9379</b> | 23 | L  | 5  | <b>682.8301</b>  | 341.9190         | 228.2820        |
| 2662.0416       | <b>1331.5248</b> | 24 | F  | 4  | 569.6724         | 285.3402         | 190.5628        |
| 2790.2139       | <b>1395.6109</b> | 25 | K  | 3  | 422.4986         | 211.7533         | 141.5048        |
| 2918.3431       | 1459.6755        | 26 | Q  | 2  | 294.3263         | 147.6671         | 98.7807         |
|                 |                  | 27 | F  | 1  | 166.1971         | 83.6025          | 56.0710         |

# QWLGSSWPGYVRPLPPAAIESPAVAAPAYSRA

X-range:

0 - 0

MassTol: Y-zoom:

0.950 1.00

MassType:

AVG  MONO

Axis:

1  2

Label:

I  M  -

Ions:

a  +  2+  3+

b  +  2+  3+

c  +  2+  3+

x  +  2+  3+

y  +  2+  3+

z  +  2+  3+

hide H<sub>2</sub>O/NH<sub>3</sub>

zoom 112-122

GO

WLGSSWPGYVRPLPPAAIESPAVAAPAYSRA, MH+ 3225.6316, m/z 1075.8820  
 sir32\_010810\_run1\_100127172200.7639.7639.3.dta

scan 0; 5.4e+002

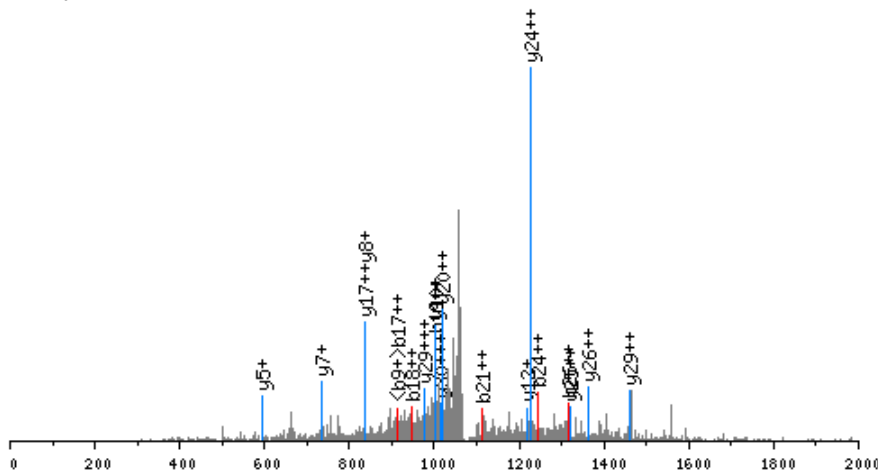

click image to zoom in; click top corners to zoom out

| b <sup>+</sup> | b <sup>2+</sup> | #  | AA | #  | y <sup>+</sup> | y <sup>2+</sup> | y <sup>3+</sup> |
|----------------|-----------------|----|----|----|----------------|-----------------|-----------------|
| 187.2178       | 94.1129         | 1  | W  | 31 |                |                 |                 |
| 300.3755       | 150.6917        | 2  | L  | 30 | 3039.4217      | 1520.2148       | 1013.8125       |
| 357.4268       | 179.2174        | 3  | G  | 29 | 2926.2640      | 1463.6360       | 976.0933        |
| 414.4781       | 207.7430        | 4  | G  | 28 | 2869.2127      | 1435.1103       | 957.0762        |
| 501.5554       | 251.2817        | 5  | S  | 27 | 2812.1614      | 1406.5847       | 938.0591        |
| 588.6327       | 294.8203        | 6  | S  | 26 | 2725.0841      | 1363.0460       | 909.0333        |
| 774.8426       | 387.9253        | 7  | W  | 25 | 2638.0068      | 1319.5074       | 880.0076        |
| 871.9578       | 436.4829        | 8  | P  | 24 | 2451.7969      | 1226.4024       | 817.9376        |
| 929.0091       | 465.0085        | 9  | G  | 23 | 2354.6817      | 1177.8448       | 785.5659        |
| 1092.1824      | 546.5952        | 10 | Y  | 22 | 2297.6304      | 1149.3192       | 766.5488        |
| 1191.3134      | 596.1607        | 11 | V  | 21 | 2134.4571      | 1067.7325       | 712.1577        |
| 1347.4991      | 674.2535        | 12 | R  | 20 | 2035.3261      | 1018.1670       | 679.1140        |
| 1444.6143      | 722.8111        | 13 | P  | 19 | 1879.1404      | 940.0742        | 627.0521        |
| 1557.7719      | 779.3899        | 14 | L  | 18 | 1782.0252      | 891.5166        | 594.6804        |
| 1654.8871      | 827.9475        | 15 | P  | 17 | 1668.8676      | 834.9378        | 556.9611        |
| 1752.0023      | 876.5051        | 16 | P  | 16 | 1571.7524      | 786.3802        | 524.5894        |
| 1823.0802      | 912.0441        | 17 | A  | 15 | 1474.6372      | 737.8226        | 492.2177        |
| 1894.1581      | 947.5830        | 18 | A  | 14 | 1403.5593      | 702.2836        | 468.5251        |
| 2007.3157      | 1004.1618       | 19 | I  | 13 | 1332.4814      | 666.7447        | 444.8324        |
| 2136.4297      | 1068.7188       | 20 | E  | 12 | 1219.3238      | 610.1659        | 407.1132        |
| 2223.5070      | 1112.2575       | 21 | S  | 11 | 1090.2098      | 545.6089        | 364.0752        |
| 2320.6222      | 1160.8151       | 22 | P  | 10 | 1003.1325      | 502.0702        | 335.0495        |
| 2391.7001      | 1196.3540       | 23 | A  | 9  | 906.0173       | 453.5126        | 302.6777        |
| 2490.8312      | 1245.9195       | 24 | V  | 8  | 834.9394       | 417.9737        | 278.9851        |
| 2561.9091      | 1281.4585       | 25 | A  | 7  | 735.8083       | 368.4081        | 245.9414        |
| 2632.9870      | 1316.9974       | 26 | A  | 6  | 664.7304       | 332.8692        | 222.2488        |
| 2730.1021      | 1365.5550       | 27 | P  | 5  | 593.6525       | 297.3302        | 198.5561        |
| 2801.1800      | 1401.0940       | 28 | A  | 4  | 496.5374       | 248.7727        | 166.1844        |
| 2964.3533      | 1482.6806       | 29 | Y  | 3  | 425.4595       | 213.2337        | 142.4918        |
| 3051.4306      | 1526.2193       | 30 | S  | 2  | 262.2862       | 131.6471        | 88.1007         |
|                |                 | 31 | R  | 1  | 175.2089       | 88.1084         | 59.0749         |

# LRQKAEADKNDKSVKDLV

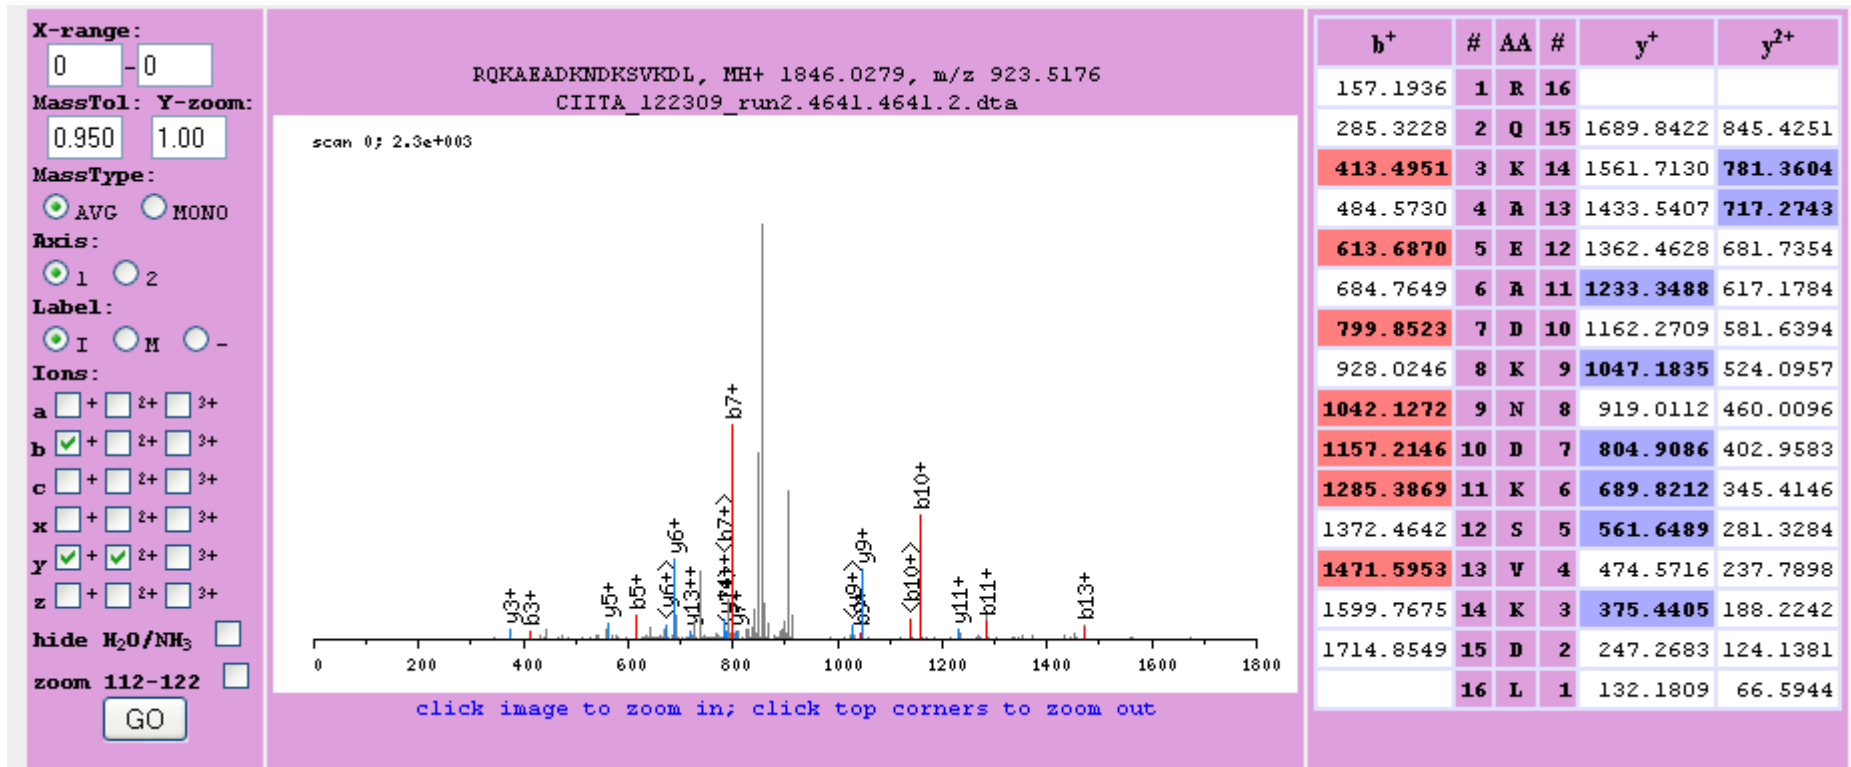

# LKQVHPDTGISSKAMGIMNSF

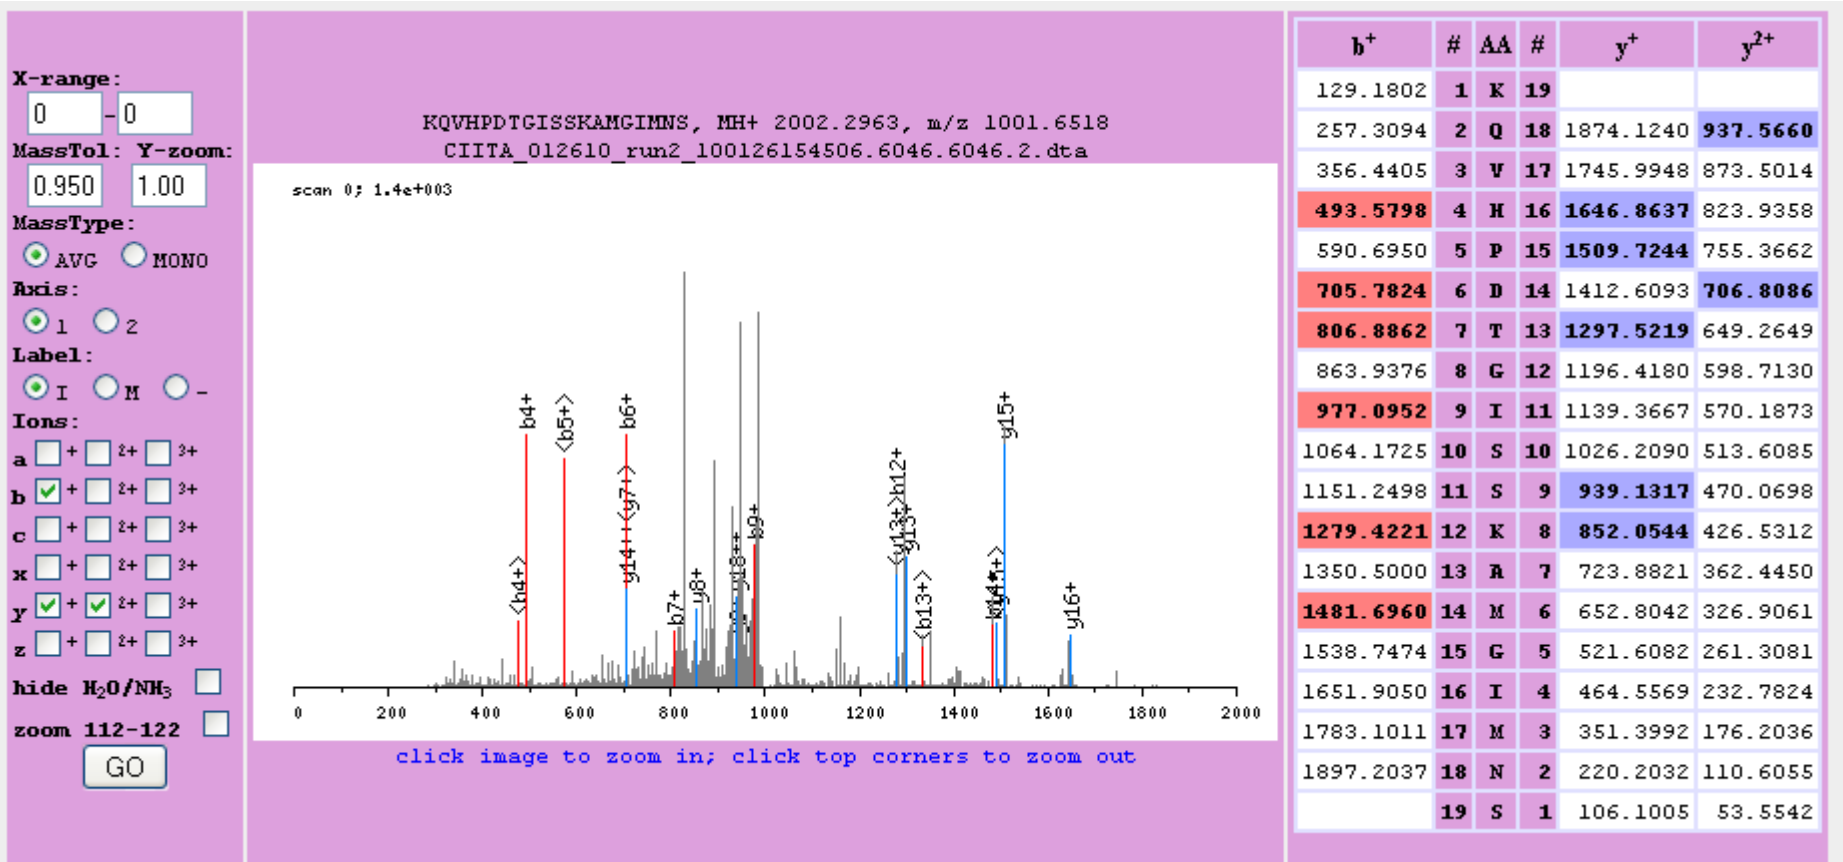

# LTNSPVELREP NVLI

**X-range:**  
 -

**MassTol:**  **Y-zoom:**

**MassType:**  
 AVG  MONO

**Axis:**  
 1  2

**Label:**  
 I  M  -

**Ions:**

a  +  2+  3+

b  +  2+  3+

c  +  2+  3+

x  +  2+  3+

y  +  2+  3+

z  +  2+  3+

hide H<sub>2</sub>O/NH<sub>3</sub>

zoom 112-122

TNSPVELREP NVL, MH+ 1468.6311, m/z 734.8192  
 CIITA\_012610\_run1.6666.6666.2.dta

scan 0; 8.4e+002

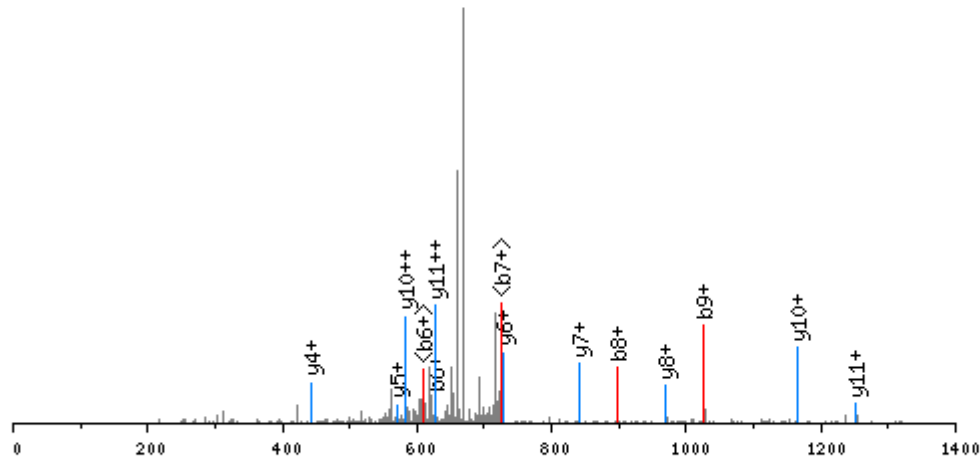

click image to zoom in; click top corners to zoom out

| b <sup>+</sup> | #  | AA | #  | y <sup>+</sup> | y <sup>2+</sup> |
|----------------|----|----|----|----------------|-----------------|
| 102.1118       | 1  | T  | 13 |                |                 |
| 216.2145       | 2  | N  | 12 | 1367.5272      | 684.2676        |
| 303.2918       | 3  | S  | 11 | 1253.4246      | 627.2162        |
| 400.4069       | 4  | P  | 10 | 1166.3473      | 583.6776        |
| 499.5380       | 5  | V  | 9  | 1069.2321      | 535.1200        |
| 628.6520       | 6  | E  | 8  | 970.1010       | 485.5545        |
| 741.8096       | 7  | L  | 7  | 840.9870       | 420.9975        |
| 897.9953       | 8  | R  | 6  | 727.8294       | 364.4187        |
| 1027.1093      | 9  | E  | 5  | 571.6437       | 286.3258        |
| 1124.2245      | 10 | P  | 4  | 442.5297       | 221.7688        |
| 1238.3271      | 11 | N  | 3  | 345.4146       | 173.2113        |
| 1337.4582      | 12 | V  | 2  | 231.3119       | 116.1599        |
|                | 13 | L  | 1  | 132.1809       | 66.5944         |

# EFGANAKKTSGNSVKIVKVKKE

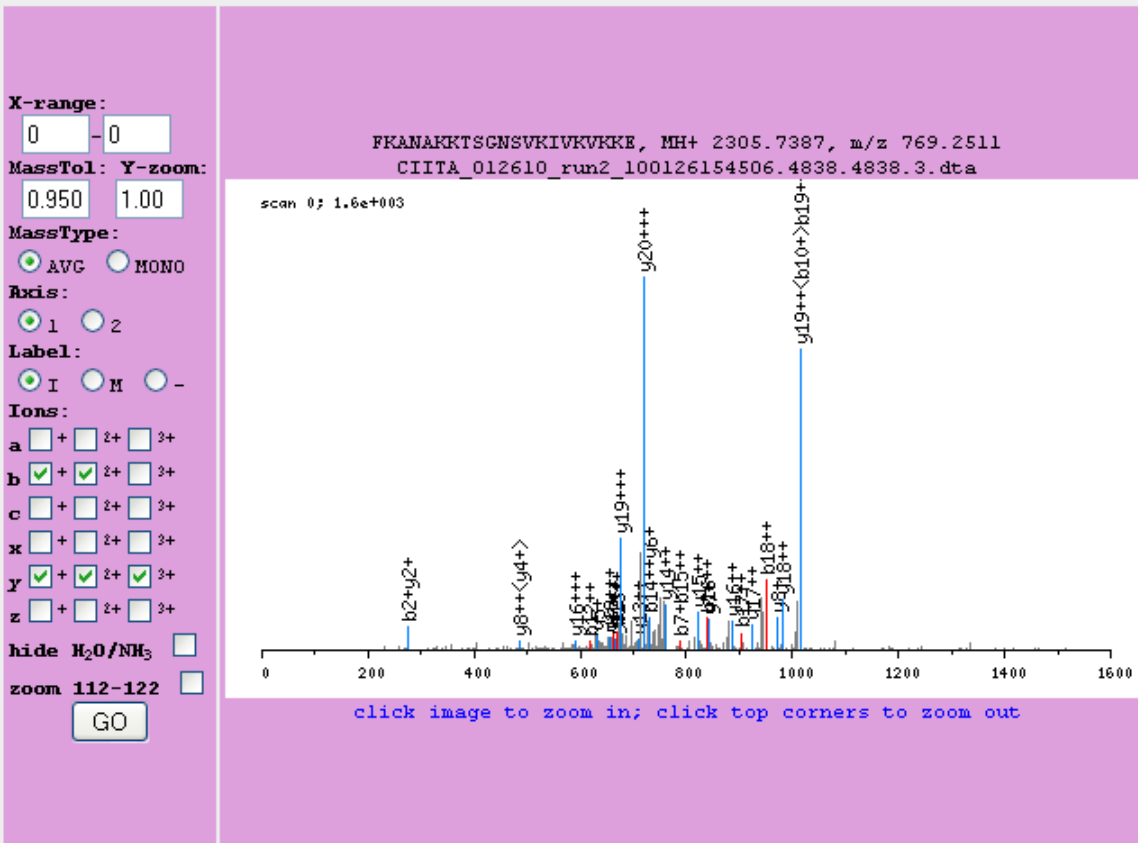

| b <sup>+</sup>  | b <sup>2+</sup>  | #  | AA | #  | y <sup>+</sup>  | y <sup>2+</sup>  | y <sup>3+</sup> |
|-----------------|------------------|----|----|----|-----------------|------------------|-----------------|
| 148.1818        | 74.5949          | 1  | F  | 21 |                 |                  |                 |
| <b>276.3541</b> | 138.6810         | 2  | K  | 20 | 2158.5649       | 1079.7864        | <b>720.1936</b> |
| 347.4320        | 174.2200         | 3  | R  | 19 | 2030.3926       | <b>1015.7003</b> | <b>677.4695</b> |
| 461.5346        | 231.2713         | 4  | N  | 18 | 1959.3147       | <b>980.1613</b>  | <b>653.7769</b> |
| 532.6125        | 266.8102         | 5  | R  | 17 | 1845.2120       | <b>923.1100</b>  | 615.7426        |
| <b>660.7848</b> | 330.8964         | 6  | K  | 16 | 1774.1341       | <b>887.5710</b>  | <b>592.0500</b> |
| <b>788.9571</b> | 394.9825         | 7  | K  | 15 | 1645.9619       | <b>823.4849</b>  | 549.3259        |
| 890.0610        | 445.5344         | 8  | T  | 14 | 1517.7896       | <b>759.3988</b>  | 506.6018        |
| 977.1383        | 489.0731         | 9  | S  | 13 | 1416.6857       | <b>708.8468</b>  | 472.9005        |
| 1034.1896       | 517.5988         | 10 | G  | 12 | 1329.6084       | <b>665.3082</b>  | 443.8748        |
| 1148.2922       | 574.6501         | 11 | N  | 11 | 1272.5571       | 636.7825         | 424.8577        |
| 1235.3695       | <b>618.1887</b>  | 12 | S  | 10 | 1158.4544       | 579.7312         | 386.8234        |
| 1334.5006       | <b>667.7543</b>  | 13 | V  | 9  | 1071.3771       | 536.1925         | 357.7977        |
| 1462.6729       | <b>731.8404</b>  | 14 | K  | 8  | <b>972.2461</b> | <b>486.6270</b>  | 324.7540        |
| 1575.8305       | <b>788.4192</b>  | 15 | I  | 7  | <b>844.0738</b> | 422.5409         | 282.0299        |
| 1674.9616       | <b>837.9847</b>  | 16 | V  | 6  | <b>730.9162</b> | 365.9620         | 244.3107        |
| 1803.1338       | <b>902.0709</b>  | 17 | K  | 5  | <b>631.7851</b> | 316.3965         | 211.2670        |
| 1902.2649       | <b>951.6364</b>  | 18 | V  | 4  | 503.6128        | 252.3104         | 168.5429        |
| 2030.4372       | <b>1015.7226</b> | 19 | K  | 3  | 404.4818        | 202.7448         | 135.4992        |
| 2158.6095       | 1079.8087        | 20 | K  | 2  | <b>276.3095</b> | 138.6587         | 92.7751         |
|                 |                  | 21 | E  | 1  | 148.1372        | 74.5726          | 50.0510         |



# LSVSEVGTQTSITTACAGTQTAVITR

X-range:  -

MassTol:  Y-zoom:

MassType:  
 AVG  MONO

Axis:  
 1  2

Label:  
 I  M  -

Ions:  
a  +  2+  3+  
b  +  2+  3+  
c  +  2+  3+  
x  +  2+  3+  
y  +  2+  3+  
z  +  2+  3+

hide H<sub>2</sub>O/NH<sub>3</sub>

zoom

SVSEVGTQTSITTACAGTQTAVIT, MH+ 2327.5424, m/z 1164.2748  
 CIITA\_012610\_run1.4913.4913.2.dta

scan 0; 1.0e+003

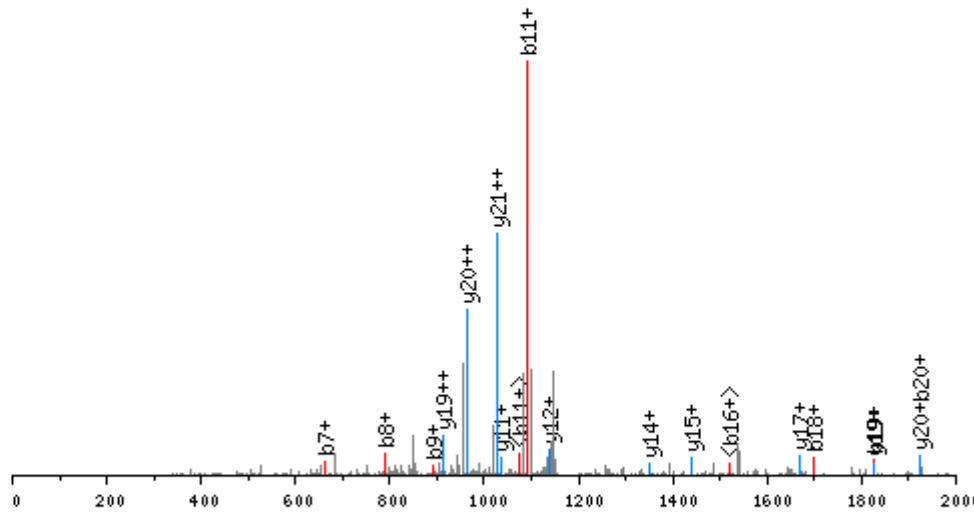

click image to zoom in; click top corners to zoom out

| b <sup>+</sup> | #  | AA | #  | y <sup>+</sup> | y <sup>2+</sup> |
|----------------|----|----|----|----------------|-----------------|
| 88.0852        | 1  | S  | 24 |                |                 |
| 187.2163       | 2  | V  | 23 | 2240.4651      | 1120.7365       |
| 274.2936       | 3  | S  | 22 | 2141.3340      | 1071.1710       |
| 403.4076       | 4  | E  | 21 | 2054.2567      | 1027.6323       |
| 502.5386       | 5  | V  | 20 | 1925.1428      | 963.0754        |
| 559.5900       | 6  | G  | 19 | 1826.0117      | 913.5098        |
| 660.6938       | 7  | T  | 18 | 1768.9604      | 884.9842        |
| 788.8231       | 8  | Q  | 17 | 1667.8565      | 834.4322        |
| 889.9269       | 9  | T  | 16 | 1539.7273      | 770.3676        |
| 977.0042       | 10 | S  | 15 | 1438.6234      | 719.8157        |
| 1090.1619      | 11 | I  | 14 | 1351.5461      | 676.2770        |
| 1191.2658      | 12 | T  | 13 | 1238.3885      | 619.6982        |
| 1292.3696      | 13 | T  | 12 | 1137.2846      | 569.1463        |
| 1363.4475      | 14 | R  | 11 | 1036.1807      | 518.5943        |
| 1466.5904      | 15 | C  | 10 | 965.1028       | 483.0554        |
| 1537.6683      | 16 | R  | 9  | 861.9599       | 431.4839        |
| 1594.7197      | 17 | G  | 8  | 790.8820       | 395.9450        |
| 1695.8235      | 18 | T  | 7  | 733.8307       | 367.4193        |
| 1823.9528      | 19 | Q  | 6  | 632.7268       | 316.8674        |
| 1925.0566      | 20 | T  | 5  | 504.5976       | 252.8028        |
| 1996.1345      | 21 | R  | 4  | 403.4937       | 202.2508        |
| 2095.2656      | 22 | V  | 3  | 332.4158       | 166.7119        |
| 2208.4232      | 23 | I  | 2  | 233.2847       | 117.1463        |
|                | 24 | T  | 1  | 120.1271       | 60.5675         |

# ILSHFEKLEPQAAVVKALGEL

X-range:

0 - 0

MassTol: Y-zoom:

0.950 1.00

MassType:

AVG  MONO

Axis:

1  2

Label:

I  M  -

Ions:

a  +  2+  3+

b  +  2+  3+

c  +  2+  3+

x  +  2+  3+

y  +  2+  3+

z  +  2+  3+

hide H<sub>2</sub>O/NH<sub>3</sub>

zoom 112-122

GO

LSHFEEKLEPQAAVVKALGE, MH+ 2067.3646, m/z 1034.1859  
CIITA\_122309\_run1.7442.7442.2.dta

scan 0; 1.9e+003

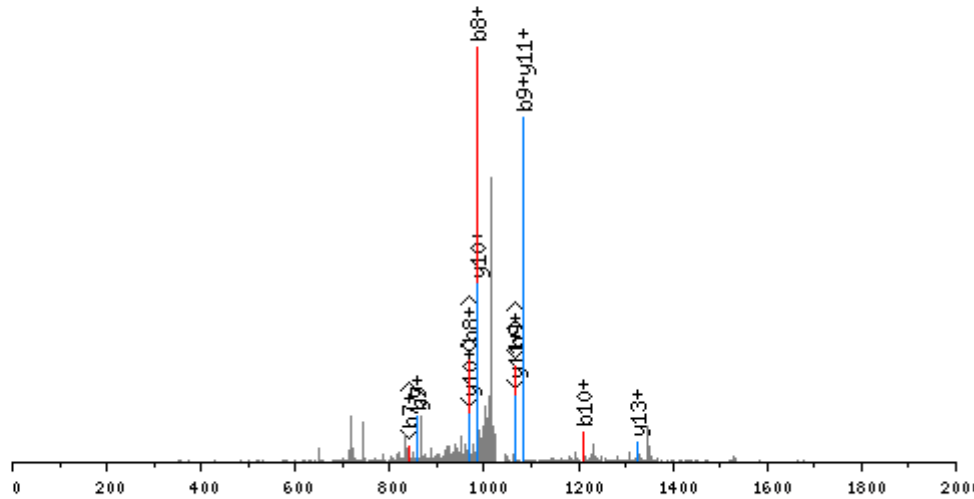

click image to zoom in; click top corners to zoom out

| b <sup>+</sup> | #  | AA | #  | y <sup>+</sup> | y <sup>2+</sup> |
|----------------|----|----|----|----------------|-----------------|
| 114.1656       | 1  | L  | 19 |                |                 |
| 201.2429       | 2  | S  | 18 | 1954.2070      | 977.6075        |
| 338.3822       | 3  | H  | 17 | 1867.1297      | 934.0688        |
| 485.5560       | 4  | F  | 16 | 1729.9904      | 865.4992        |
| 614.6700       | 5  | E  | 15 | 1582.8165      | 791.9122        |
| 742.8423       | 6  | K  | 14 | 1453.7026      | 727.3552        |
| 855.9999       | 7  | L  | 13 | 1325.5303      | 663.2691        |
| 985.1139       | 8  | E  | 12 | 1212.3726      | 606.6903        |
| 1082.2291      | 9  | P  | 11 | 1083.2587      | 542.1333        |
| 1210.3583      | 10 | Q  | 10 | 986.1435       | 493.5757        |
| 1281.4362      | 11 | R  | 9  | 858.0143       | 429.5111        |
| 1352.5141      | 12 | R  | 8  | 786.9364       | 393.9721        |
| 1451.6452      | 13 | V  | 7  | 715.8585       | 358.4332        |
| 1550.7762      | 14 | V  | 6  | 616.7274       | 308.8677        |
| 1678.9485      | 15 | K  | 5  | 517.5963       | 259.3021        |
| 1750.0264      | 16 | R  | 4  | 389.4241       | 195.2160        |
| 1863.1840      | 17 | L  | 3  | 318.3462       | 159.6770        |
| 1920.2354      | 18 | G  | 2  | 205.1885       | 103.0982        |
|                | 19 | E  | 1  | 148.1372       | 74.5726         |

# KSIRDTPAKNAQKS

**X-range:**  
 -

**MassTol:**  **Y-zoom:**

**MassType:**  
 AVG  MONO

**Axis:**  
 1  2

**Label:**  
 I  M  -

**Ions:**

a  +  2+  3+

b  +  2+  3+

c  +  2+  3+

x  +  2+  3+

y  +  2+  3+

z  +  2+  3+

hide H<sub>2</sub>O/NH<sub>3</sub>

zoom 112-122

SIRDTPAKNAQK, MH+ 1329.4825, m/z 665.2449  
 sir32\_010810\_run2.3893.3893.2.dta

scan 0; 9.6e+02

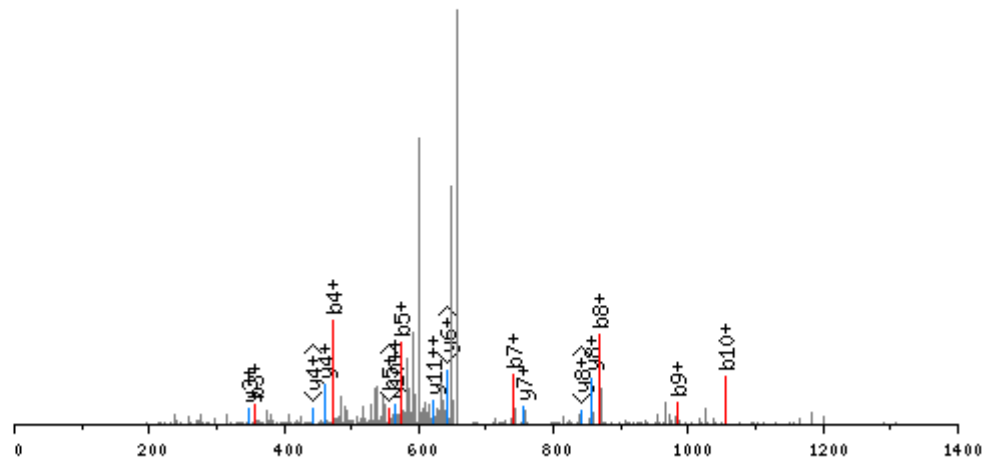

click image to zoom in; click top corners to zoom out

| b <sup>+</sup> | #  | AA | #  | y <sup>+</sup> | y <sup>2+</sup> |
|----------------|----|----|----|----------------|-----------------|
| 88.0852        | 1  | S  | 12 |                |                 |
| 201.2429       | 2  | I  | 11 | 1242.4052      | 621.7066        |
| 357.4286       | 3  | R  | 10 | 1129.2476      | 565.1278        |
| 472.5160       | 4  | D  | 9  | 973.0619       | 487.0349        |
| 573.6198       | 5  | T  | 8  | 857.9745       | 429.4912        |
| 670.7350       | 6  | P  | 7  | 756.8706       | 378.9393        |
| 741.8129       | 7  | A  | 6  | 659.7554       | 330.3817        |
| 869.9852       | 8  | K  | 5  | 588.6775       | 294.8427        |
| 984.0878       | 9  | N  | 4  | 460.5053       | 230.7566        |
| 1055.1657      | 10 | A  | 3  | 346.4026       | 173.7053        |
| 1183.2950      | 11 | Q  | 2  | 275.3247       | 138.1663        |
|                | 12 | K  | 1  | 147.1955       | 74.1017         |

# NDALINQKYDEVMTYILLGR

X-range:

0 - 0

MassTol: Y-zoom:

0.950 1.00

MassType:

AVG  MONO

Axis:

1  2

Label:

I  M  -

Ions:

a  +  2+  3+

b  +  2+  3+

c  +  2+  3+

x  +  2+  3+

y  +  2+  3+

z  +  2+  3+

hide H<sub>2</sub>O/NH<sub>3</sub>

zoom 112-122

GO

DALINQKYDEVMTYILLG, MH+ 2171.4890, m/z 1086.2481

CIITA\_122309\_run2.6088.6088.2.dta

scan 0; 9.3e+002

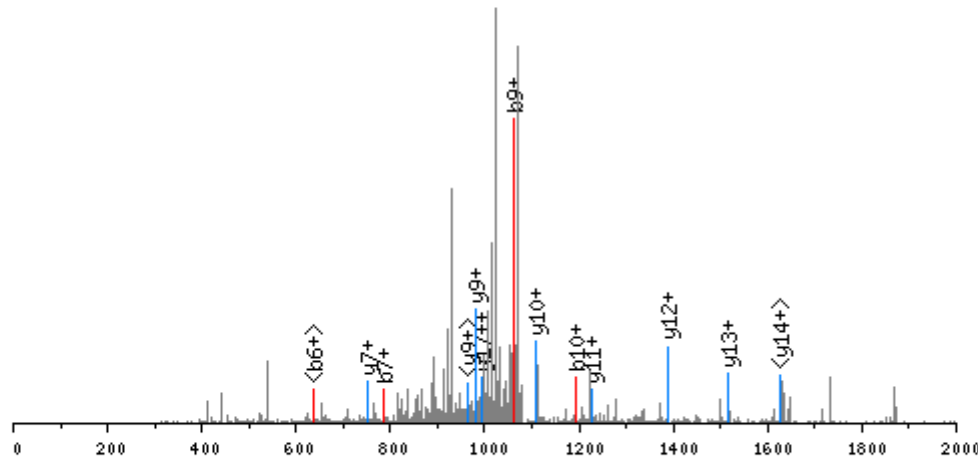

click image to zoom in; click top corners to zoom out

| b <sup>+</sup>   | #  | AA | #  | y <sup>+</sup>   | y <sup>2+</sup> |
|------------------|----|----|----|------------------|-----------------|
| 116.0953         | 1  | D  | 19 |                  |                 |
| 187.1732         | 2  | R  | 18 | 2056.4016        | 1028.7048       |
| 300.3309         | 3  | L  | 17 | 1985.3237        | <b>993.1658</b> |
| 413.4885         | 4  | I  | 16 | 1872.1660        | 936.5870        |
| 527.5912         | 5  | N  | 15 | 1759.0084        | 880.0082        |
| 655.7204         | 6  | Q  | 14 | 1644.9058        | 822.9568        |
| <b>783.8927</b>  | 7  | K  | 13 | <b>1516.7765</b> | 758.8922        |
| 947.0659         | 8  | Y  | 12 | <b>1388.6043</b> | 694.8061        |
| <b>1062.1533</b> | 9  | D  | 11 | <b>1225.4310</b> | 613.2195        |
| <b>1191.2673</b> | 10 | E  | 10 | <b>1110.3436</b> | 555.6758        |
| 1290.3984        | 11 | V  | 9  | <b>981.2296</b>  | 491.1188        |
| 1421.5944        | 12 | M  | 8  | 882.0986         | 441.5532        |
| 1492.6723        | 13 | R  | 7  | <b>750.9025</b>  | 375.9552        |
| 1593.7762        | 14 | T  | 6  | 679.8246         | 340.4163        |
| 1756.9495        | 15 | Y  | 5  | 578.7207         | 289.8643        |
| 1870.1071        | 16 | I  | 4  | 415.5475         | 208.2777        |
| 1983.2647        | 17 | L  | 3  | 302.3898         | 151.6989        |
| 2096.4224        | 18 | L  | 2  | 189.2322         | 95.1201         |
|                  | 19 | G  | 1  | 76.0745          | 38.5412         |

# RMKLPKPPKPVSKMRM

X-range:

0 - 0

MassTol: Y-zoom:

0.950 1.00

MassType:

AVG  MONO

Axis:

1  2

Label:

I  M  -

Ions:

a  +  2+  3+

b  +  2+  3+

c  +  2+  3+

x  +  2+  3+

y  +  2+  3+

z  +  2+  3+

hide H<sub>2</sub>O/NH<sub>3</sub>

zoom 112-122

GO

MKLPKPPKPVSKMR, MH+ 1638.1169, m/z 819.5621  
 CIITA\_012610\_run1.5638.5638.2.dta

scan 0; 7.8e+002

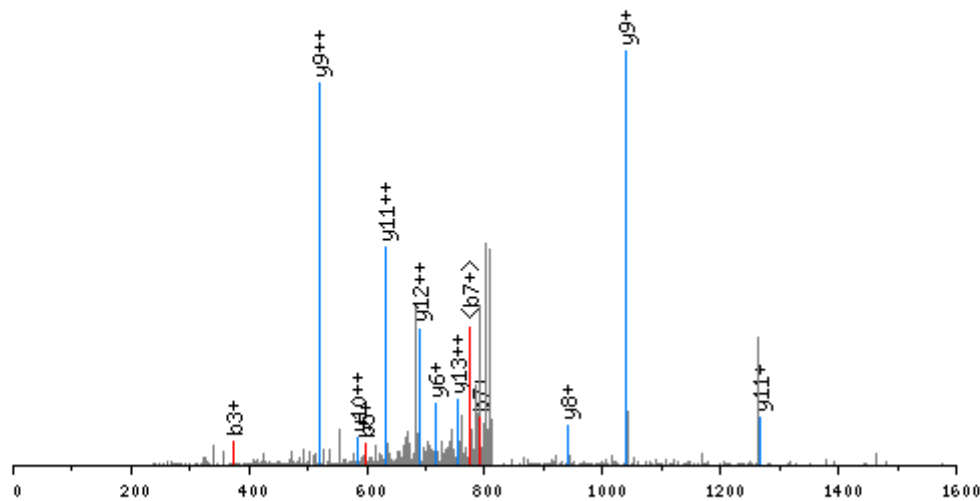

click image to zoom in; click top corners to zoom out

| b <sup>+</sup> | #  | AA | #  | y <sup>+</sup> | y <sup>2+</sup> |
|----------------|----|----|----|----------------|-----------------|
| 132.2040       | 1  | M  | 14 |                |                 |
| 260.3763       | 2  | K  | 13 | 1506.9208      | 753.9644        |
| 373.5339       | 3  | L  | 12 | 1378.7485      | 689.8782        |
| 470.6491       | 4  | P  | 11 | 1265.5909      | 633.2994        |
| 598.8214       | 5  | K  | 10 | 1168.4757      | 584.7418        |
| 695.9366       | 6  | P  | 9  | 1040.3034      | 520.6557        |
| 793.0517       | 7  | P  | 8  | 943.1882       | 472.0981        |
| 921.2240       | 8  | K  | 7  | 846.0731       | 423.5405        |
| 1018.3392      | 9  | P  | 6  | 717.9008       | 359.4544        |
| 1117.4703      | 10 | V  | 5  | 620.7856       | 310.8968        |
| 1204.5476      | 11 | S  | 4  | 521.6545       | 261.3312        |
| 1332.7198      | 12 | K  | 3  | 434.5772       | 217.7926        |
| 1463.9159      | 13 | M  | 2  | 306.4050       | 153.7064        |
|                | 14 | R  | 1  | 175.2089       | 88.1084         |

# WYARQDEQLQKTKANNRAAEAF

**X-range:**  
 -   
**MassTol:** **Y-zoom:**  
   
**MassType:**  
 AVG  MONO  
**Axis:**  
 1  2  
**Label:**  
 I  M  -  
**Ions:**  
a  +  2+  3+  
b  +  2+  3+  
c  +  2+  3+  
x  +  2+  3+  
y  +  2+  3+  
z  +  2+  3+  
hide  $H_2O/NH_3$    
zoom 112-122

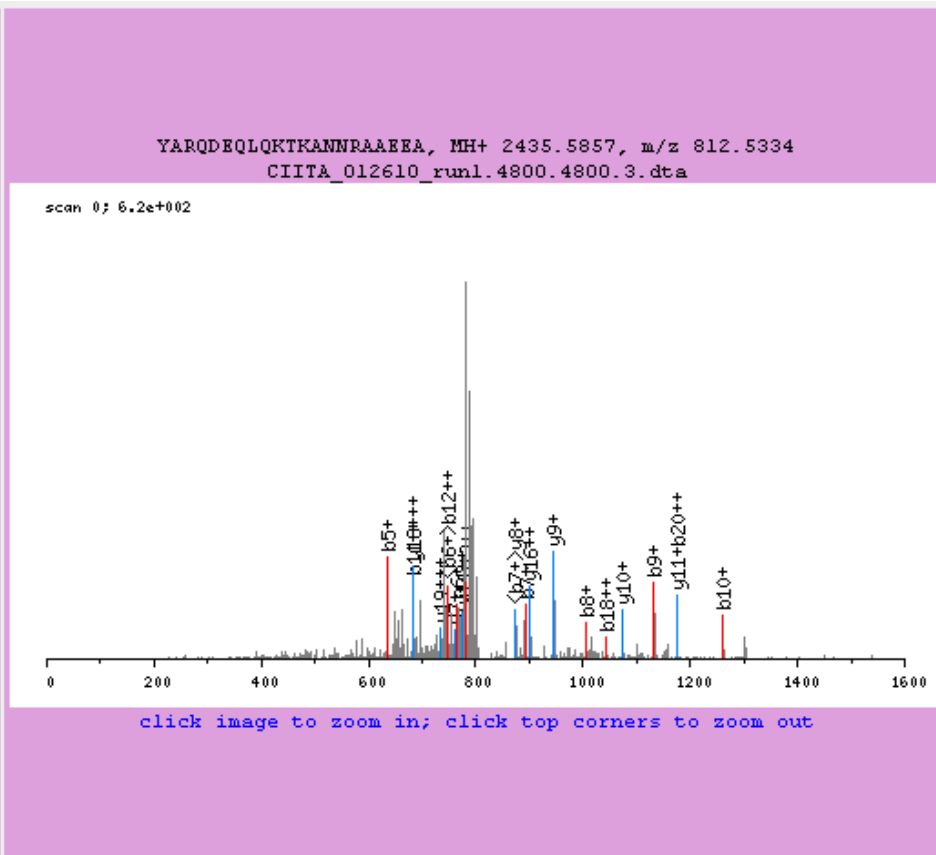

| b <sup>+</sup> | b <sup>2+</sup> | #  | AA | #  | y <sup>+</sup> | y <sup>2+</sup> | y <sup>3+</sup> |
|----------------|-----------------|----|----|----|----------------|-----------------|-----------------|
| 164.1812       | 82.5946         | 1  | Y  | 21 |                |                 |                 |
| 235.2591       | 118.1335        | 2  | R  | 20 | 2272.4124      | 1136.7102       | 758.1428        |
| 391.4448       | 196.2264        | 3  | R  | 19 | 2201.3345      | 1101.1712       | 734.4501        |
| 519.5740       | 260.2910        | 4  | Q  | 18 | 2045.1489      | 1023.0784       | 682.3882        |
| 634.6614       | 317.8347        | 5  | D  | 17 | 1917.0196      | 959.0138        | 639.6785        |
| 763.7754       | 382.3917        | 6  | E  | 16 | 1801.9322      | 901.4701        | 601.3160        |
| 891.9046       | 446.4563        | 7  | Q  | 15 | 1672.8183      | 836.9131        | 558.2780        |
| 1005.0622      | 503.0351        | 8  | L  | 14 | 1544.6890      | 772.8485        | 515.5683        |
| 1133.1915      | 567.0997        | 9  | Q  | 13 | 1431.5314      | 716.2697        | 477.8491        |
| 1261.3637      | 631.1858        | 10 | K  | 12 | 1303.4022      | 652.2051        | 435.1394        |
| 1362.4676      | 681.7378        | 11 | T  | 11 | 1175.2299      | 588.1189        | 392.4153        |
| 1490.6399      | 745.8239        | 12 | K  | 10 | 1074.1260      | 537.5670        | 358.7140        |
| 1561.7178      | 781.3629        | 13 | R  | 9  | 945.9537       | 473.4808        | 315.9899        |
| 1675.8204      | 838.4142        | 14 | N  | 8  | 874.8758       | 437.9419        | 292.2972        |
| 1789.9231      | 895.4655        | 15 | N  | 7  | 760.7732       | 380.8906        | 254.2630        |
| 1946.1088      | 973.5584        | 16 | R  | 6  | 646.6706       | 323.8393        | 216.2288        |
| 2017.1867      | 1009.0973       | 17 | R  | 5  | 490.4849       | 245.7464        | 164.1669        |
| 2088.2646      | 1044.6363       | 18 | R  | 4  | 419.4070       | 210.2075        | 140.4743        |
| 2217.3785      | 1109.1932       | 19 | E  | 3  | 348.3291       | 174.6685        | 116.7817        |
| 2346.4925      | 1173.7502       | 20 | E  | 2  | 219.2151       | 110.1115        | 73.7437         |
|                |                 | 21 | R  | 1  | 90.1011        | 45.5545         | 30.7057         |

# RDGKLVSESSDVLPK

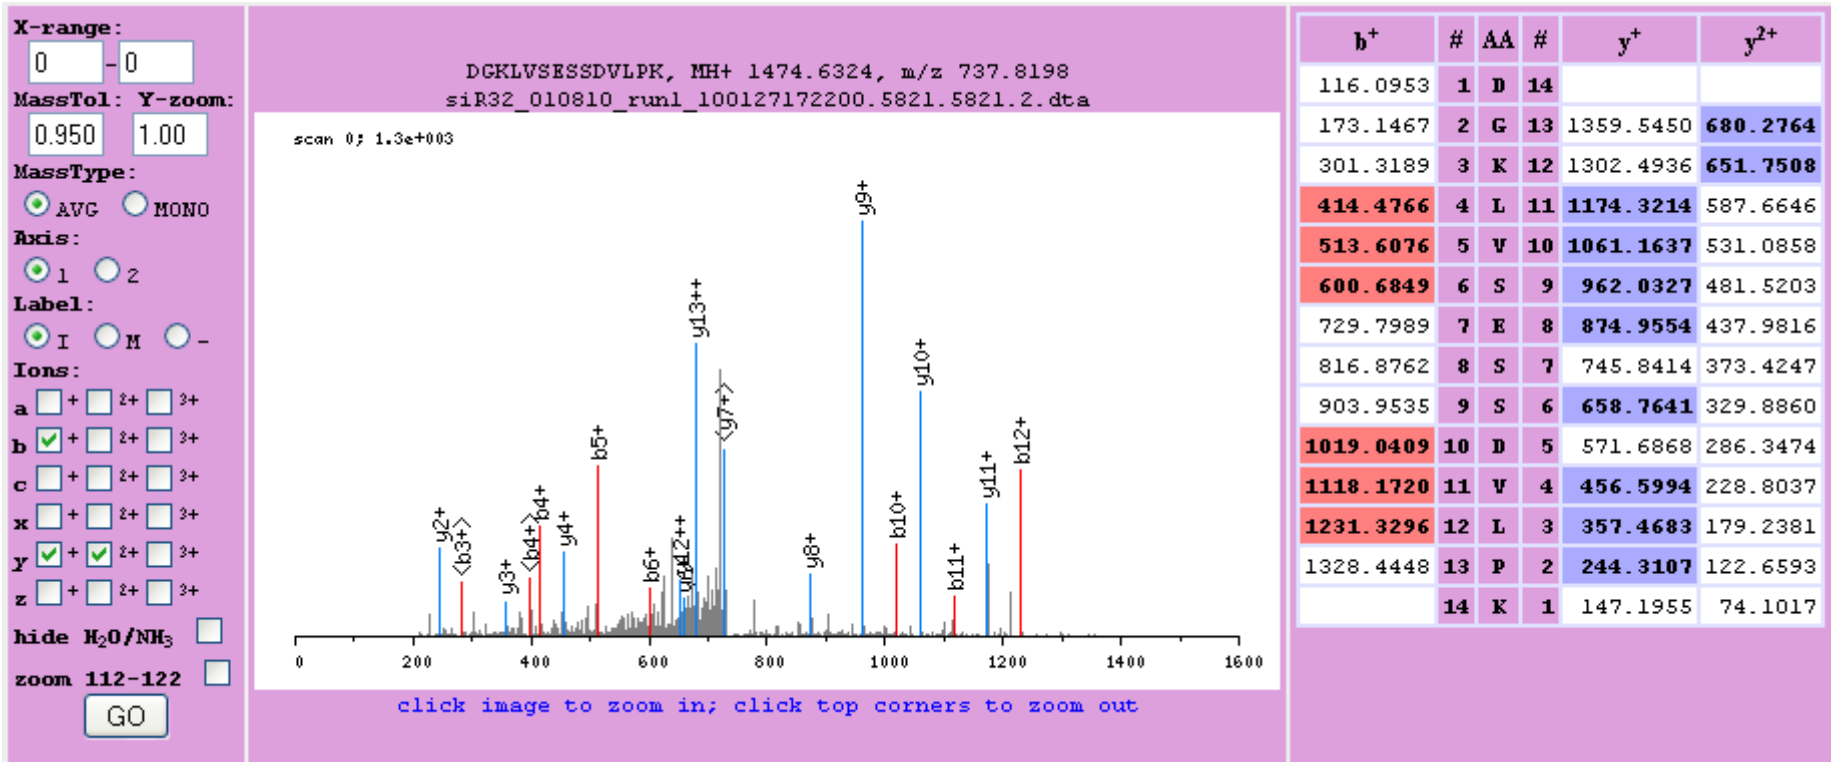

# FAQIHEMQDLGDKLRMI

X-range:

0 - 0

MassTol: Y-zoom:

0.950 1.00

MassType:

AVG  MONO

Axis:

1  2

Label:

I  M  -

Ions:

a  +  2+  3+

b  +  2+  3+

c  +  2+  3+

x  +  2+  3+

y  +  2+  3+

z  +  2+  3+

hide H<sub>2</sub>O/NH<sub>3</sub>

zoom 112-122

GO

FAQIHEMQDLGDKLRM, MH+ 1786.0619, m/z 893.5346  
 CIITA\_012610\_run1.6566.6566.2.dta

scan 0; 1.4e+003

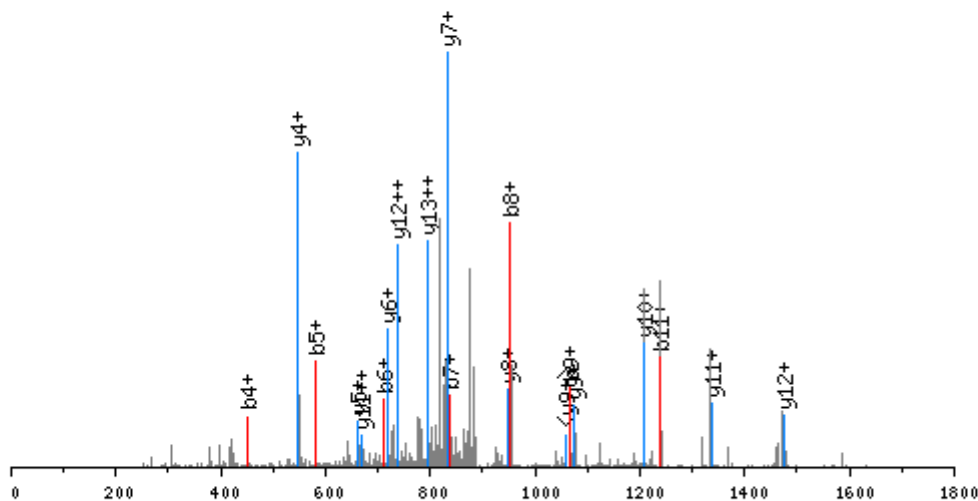

click image to zoom in; click top corners to zoom out

| b <sup>+</sup> | #  | AA | #  | y <sup>+</sup> | y <sup>2+</sup> |
|----------------|----|----|----|----------------|-----------------|
| 72.0858        | 1  | A  | 15 |                |                 |
| 200.2151       | 2  | Q  | 14 | 1714.9840      | 857.9960        |
| 313.3727       | 3  | I  | 13 | 1586.8548      | 793.9314        |
| 450.5120       | 4  | H  | 12 | 1473.6972      | 737.3526        |
| 579.6260       | 5  | E  | 11 | 1336.5579      | 668.7829        |
| 710.8220       | 6  | M  | 10 | 1207.4439      | 604.2259        |
| 838.9512       | 7  | Q  | 9  | 1076.2479      | 538.6279        |
| 954.0386       | 8  | D  | 8  | 948.1186       | 474.5633        |
| 1067.1963      | 9  | L  | 7  | 833.0312       | 417.0196        |
| 1124.2476      | 10 | G  | 6  | 719.8736       | 360.4408        |
| 1239.3350      | 11 | D  | 5  | 662.8223       | 331.9151        |
| 1367.5073      | 12 | K  | 4  | 547.7349       | 274.3714        |
| 1480.6649      | 13 | L  | 3  | 419.5626       | 210.2853        |
| 1636.8506      | 14 | R  | 2  | 306.4050       | 153.7064        |
|                | 15 | M  | 1  | 150.2193       | 75.6136         |



# VFQNHFEFGVYVCA

**X-range:**  
 -   
**MassTol:**  **Y-zoom:**   
**MassType:**  
 AVG  MONO  
**Axis:**  
 1  2  
**Label:**  
 I  M  -  
**Ions:**  
a  +  2+  3+  
b  +  2+  3+  
c  +  2+  3+  
x  +  2+  3+  
y  +  2+  3+  
z  +  2+  3+  
hide H<sub>2</sub>O/NH<sub>3</sub>   
zoom 112-122

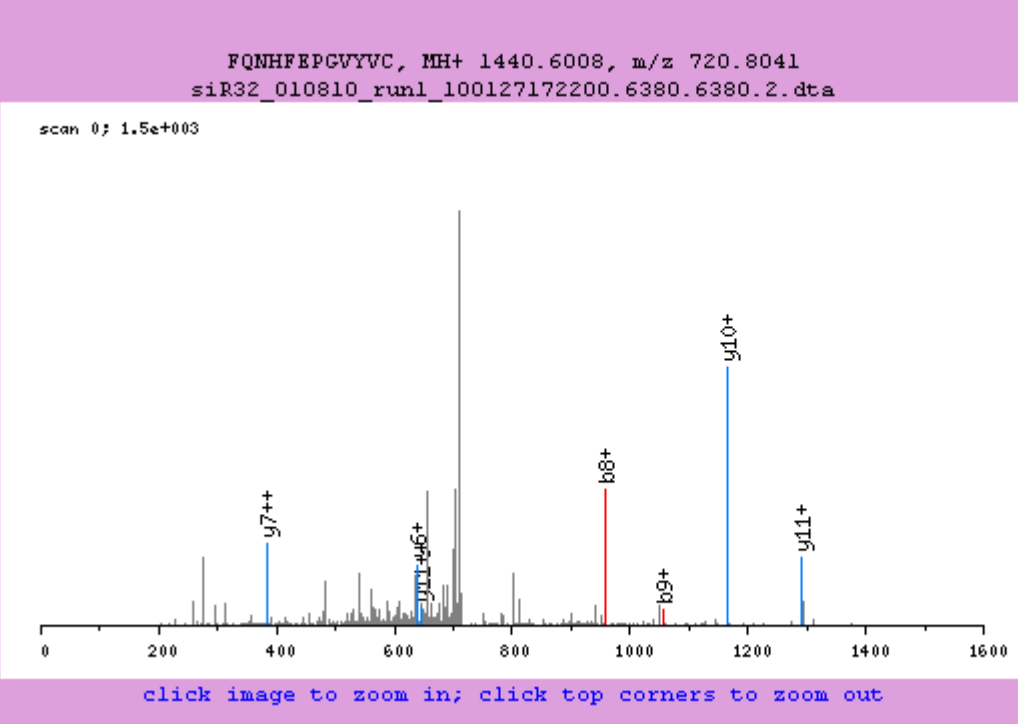

| b <sup>+</sup> | #  | AA | #  | y <sup>+</sup> | y <sup>2+</sup> |
|----------------|----|----|----|----------------|-----------------|
| 148.1818       | 1  | F  | 12 |                |                 |
| 276.3110       | 2  | Q  | 11 | 1293.4270      | 647.2175        |
| 390.4137       | 3  | N  | 10 | 1165.2978      | 583.1529        |
| 527.5529       | 4  | H  | 9  | 1051.1951      | 526.1015        |
| 674.7268       | 5  | F  | 8  | 914.0558       | 457.5319        |
| 803.8408       | 6  | E  | 7  | 766.8820       | 383.9450        |
| 900.9560       | 7  | P  | 6  | 637.7680       | 319.3880        |
| 958.0073       | 8  | G  | 5  | 540.6528       | 270.8304        |
| 1057.1383      | 9  | V  | 4  | 483.6015       | 242.3047        |
| 1220.3116      | 10 | Y  | 3  | 384.4704       | 192.7392        |
| 1319.4427      | 11 | V  | 2  | 221.2972       | 111.1526        |
|                | 12 | C  | 1  | 122.1661       | 61.5870         |

# RSKALKASAPAPGHH

**X-range:**  
 -

**MassTol:**  **Y-zoom:**

**MassType:**  
 AVG  MONO

**Axis:**  
 1  2

**Label:**  
 I  M  -

**Ions:**

a  +  2+  3+

b  +  2+  3+

c  +  2+  3+

x  +  2+  3+

y  +  2+  3+

z  +  2+  3+

hide H<sub>2</sub>O/NH<sub>3</sub>

zoom 112-122

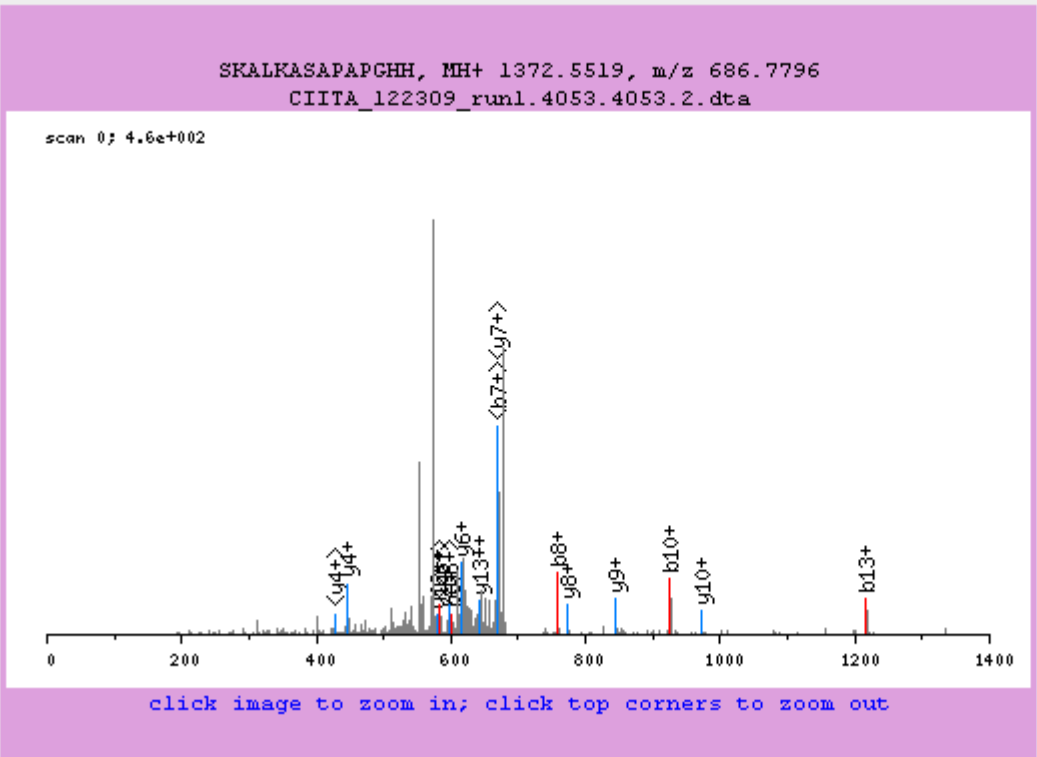

| b <sup>+</sup> | #  | AA | #  | y <sup>+</sup> | y <sup>2+</sup> |
|----------------|----|----|----|----------------|-----------------|
| 88.0852        | 1  | S  | 14 |                |                 |
| 216.2575       | 2  | K  | 13 | 1285.4746      | 643.2413        |
| 287.3354       | 3  | R  | 12 | 1157.3023      | 579.1551        |
| 400.4931       | 4  | L  | 11 | 1086.2244      | 543.6162        |
| 528.6653       | 5  | K  | 10 | 973.0667       | 487.0373        |
| 599.7432       | 6  | R  | 9  | 844.8945       | 422.9512        |
| 686.8205       | 7  | S  | 8  | 773.8166       | 387.4123        |
| 757.8984       | 8  | R  | 7  | 686.7393       | 343.8736        |
| 855.0136       | 9  | P  | 6  | 615.6614       | 308.3347        |
| 926.0915       | 10 | R  | 5  | 518.5462       | 259.7771        |
| 1023.2067      | 11 | P  | 4  | 447.4683       | 224.2381        |
| 1080.2580      | 12 | G  | 3  | 350.3531       | 175.6805        |
| 1217.3973      | 13 | H  | 2  | 293.3018       | 147.1549        |
|                | 14 | H  | 1  | 156.1625       | 78.5852         |

# VFDKEGNGTVMGAEIRHVL

X-range:

0 - 0

MassTol: Y-zoom:

0.950 1.00

MassType:

AVG  MONO

Axis:

1  2

Label:

I  M  -

Ions:

a  +  2+  3+

b  +  2+  3+

c  +  2+  3+

x  +  2+  3+

y  +  2+  3+

z  +  2+  3+

hide H<sub>2</sub>O/NH<sub>3</sub>

zoom 112-122

GO

VFDKEGNGTVMGAEIRHVL, MH+ 2073.3526, m/z 1037.1799  
CIITA\_012610\_run1.6981.6981.2.dta

scan 0; 2.6e+003

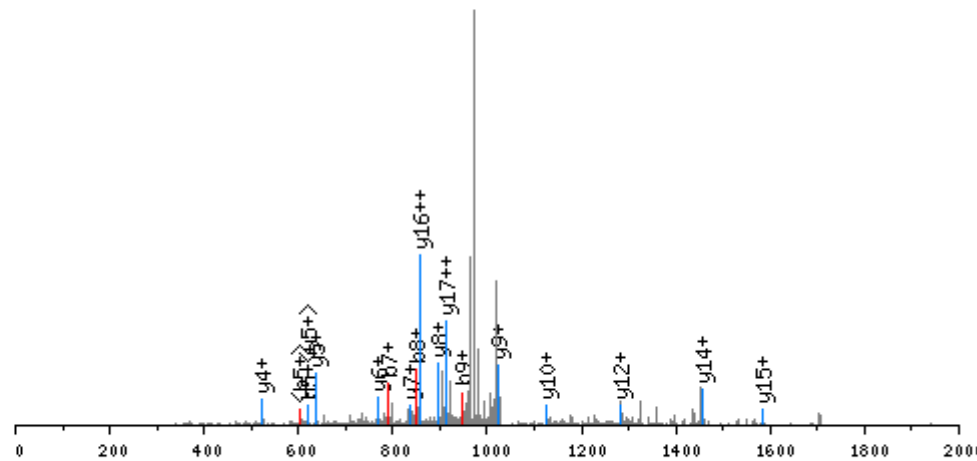

click image to zoom in; click top corners to zoom out

| b <sup>+</sup> | #  | AA | #  | y <sup>+</sup> | y <sup>2+</sup> |
|----------------|----|----|----|----------------|-----------------|
| 100.1390       | 1  | V  | 19 |                |                 |
| 247.3129       | 2  | F  | 18 | 1974.2215      | 987.6147        |
| 362.4003       | 3  | D  | 17 | 1827.0477      | 914.0278        |
| 490.5725       | 4  | K  | 16 | 1711.9603      | 856.4841        |
| 619.6865       | 5  | E  | 15 | 1583.7880      | 792.3980        |
| 676.7378       | 6  | G  | 14 | 1454.6740      | 727.8410        |
| 790.8405       | 7  | N  | 13 | 1397.6227      | 699.3153        |
| 847.8918       | 8  | G  | 12 | 1283.5200      | 642.2640        |
| 948.9957       | 9  | T  | 11 | 1226.4687      | 613.7383        |
| 1048.1267      | 10 | V  | 10 | 1125.3648      | 563.1864        |
| 1179.3228      | 11 | M  | 9  | 1026.2338      | 513.6209        |
| 1236.3741      | 12 | G  | 8  | 895.0377       | 448.0228        |
| 1307.4520      | 13 | R  | 7  | 837.9864       | 419.4972        |
| 1436.5660      | 14 | E  | 6  | 766.9085       | 383.9582        |
| 1549.7236      | 15 | I  | 5  | 637.7945       | 319.4012        |
| 1705.9093      | 16 | R  | 4  | 524.6369       | 262.8224        |
| 1843.0486      | 17 | H  | 3  | 368.4512       | 184.7296        |
| 1942.1797      | 18 | V  | 2  | 231.3119       | 116.1599        |
|                | 19 | L  | 1  | 132.1809       | 66.5944         |

# KIKGDVPSVGLGPDVDLQGPEAKI

X-range:

0 - 0

MassTol: Y-zoom:

0.950 1.00

MassType:

AVG  MONO

Axis:

1  2

Label:

I  M  -

Ions:

a  +  2+  3+

b  +  2+  3+

c  +  2+  3+

x  +  2+  3+

y  +  2+  3+

z  +  2+  3+

hide H<sub>2</sub>O/NH<sub>3</sub>

zoom 112-122

GO

IKKGDVPSVGLGPDVDLQGPEAK, MH+ 2320.2036, m/z 1160.6055  
 sir32\_MHC\_pep\_111709\_2.7114.7114.2.dta

scan 0; 6.6e+001

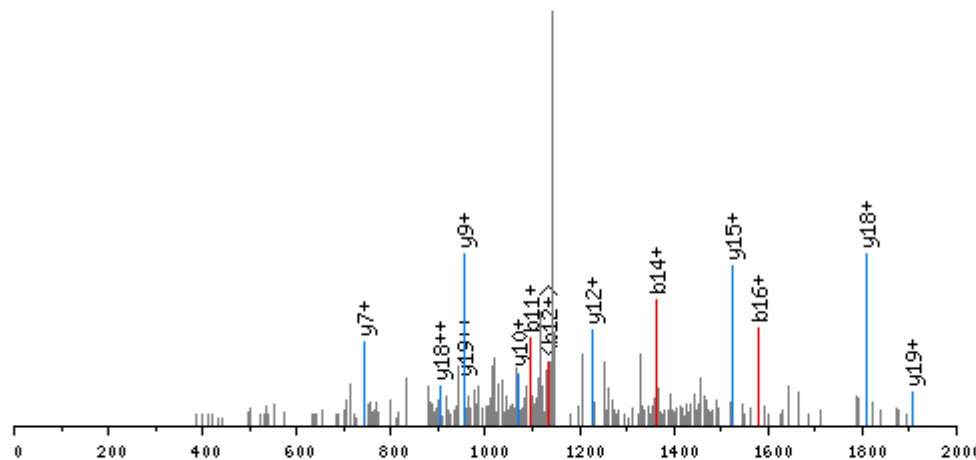

click image to zoom in; click top corners to zoom out

| b <sup>+</sup>   | #  | AA | #  | y <sup>+</sup>   | y <sup>2+</sup> |
|------------------|----|----|----|------------------|-----------------|
| 114.0919         | 1  | I  | 23 |                  |                 |
| 242.1869         | 2  | K  | 22 | 2207.1196        | 1104.0637       |
| 299.2083         | 3  | G  | 21 | 2079.0246        | 1040.0162       |
| 414.2353         | 4  | D  | 20 | 2022.0031        | 1011.5055       |
| 513.3037         | 5  | V  | 19 | <b>1906.9762</b> | <b>953.9920</b> |
| 610.3564         | 6  | P  | 18 | <b>1807.9078</b> | <b>904.4578</b> |
| 697.3885         | 7  | S  | 17 | 1710.8550        | 855.9314        |
| 796.4569         | 8  | V  | 16 | 1623.8230        | 812.4154        |
| 853.4783         | 9  | G  | 15 | <b>1524.7546</b> | 762.8812        |
| 966.5624         | 10 | L  | 14 | 1467.7331        | 734.3705        |
| <b>1095.6050</b> | 11 | E  | 13 | 1354.6490        | 677.8284        |
| 1152.6265        | 12 | G  | 12 | <b>1225.6065</b> | 613.3071        |
| 1249.6792        | 13 | P  | 11 | 1168.5850        | 584.7964        |
| <b>1364.7062</b> | 14 | D  | 10 | <b>1071.5322</b> | 536.2700        |
| 1463.7746        | 15 | V  | 9  | <b>956.5053</b>  | 478.7566        |
| <b>1578.8015</b> | 16 | D  | 8  | 857.4369         | 429.2223        |
| 1691.8856        | 17 | L  | 7  | <b>742.4099</b>  | 371.7089        |
| 1819.9442        | 18 | Q  | 6  | 629.3259         | 315.1668        |
| 1876.9656        | 19 | G  | 5  | 501.2673         | 251.1376        |
| 1974.0184        | 20 | P  | 4  | 444.2458         | 222.6268        |
| 2103.0610        | 21 | E  | 3  | 347.1931         | 174.1004        |
| 2174.0981        | 22 | R  | 2  | 218.1505         | 109.5791        |
|                  | 23 | K  | 1  | 147.1134         | 74.0606         |

# RVFDKEGNGTVMGAEIRHVLV

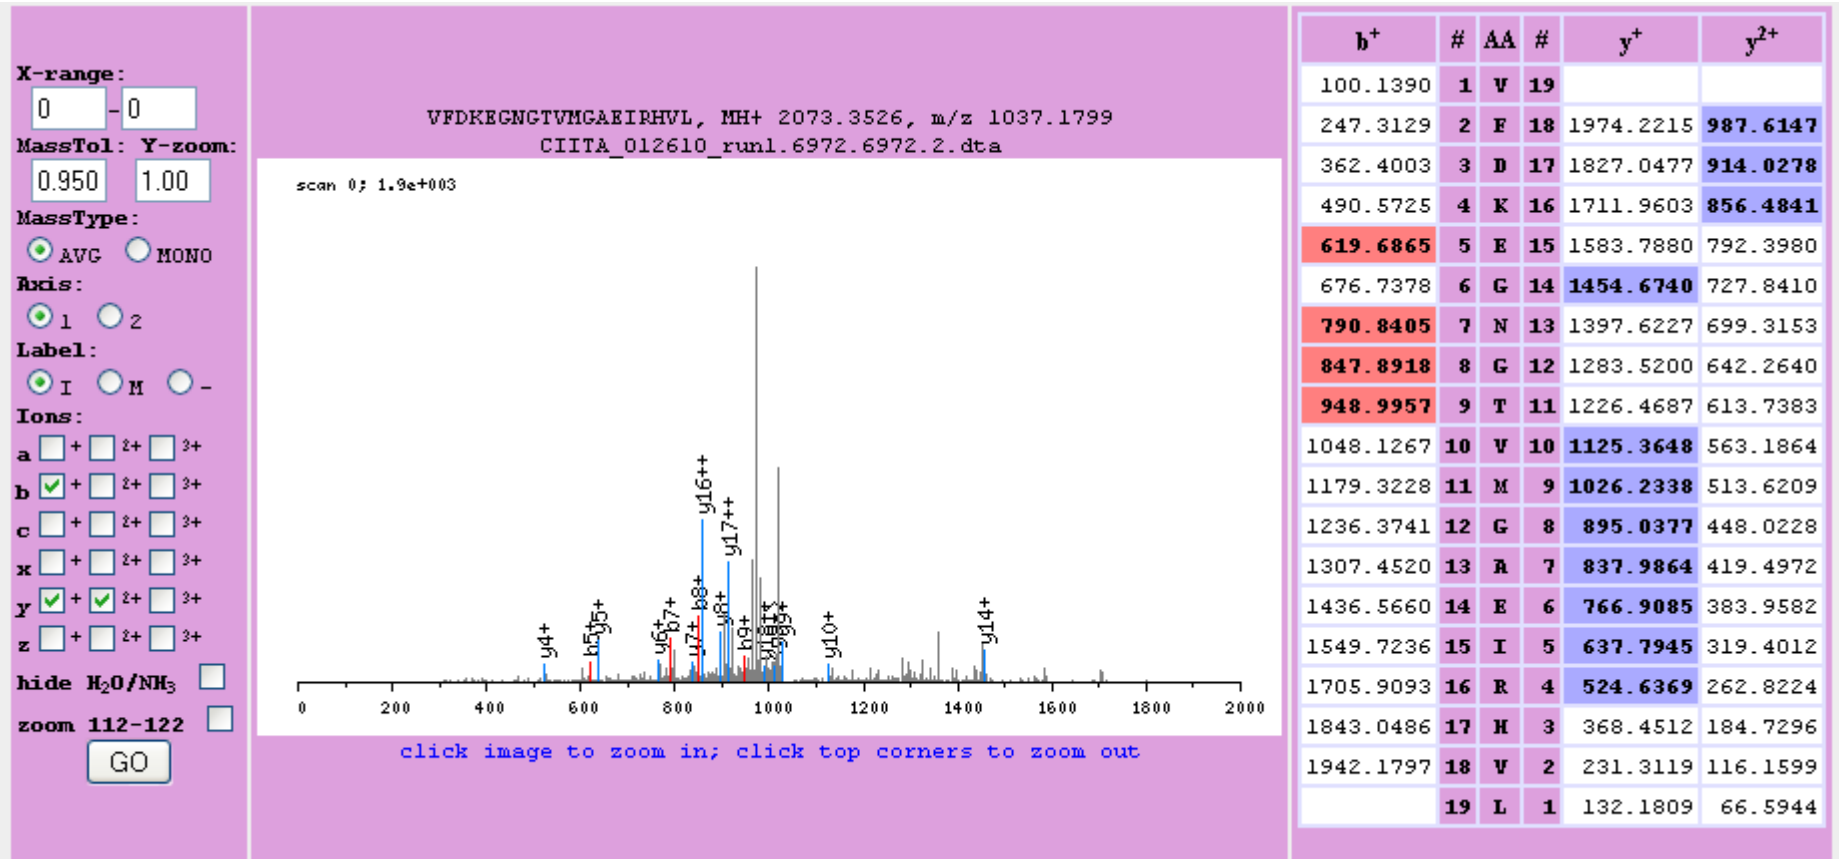

# KTPKGPSSVEDIKAKM

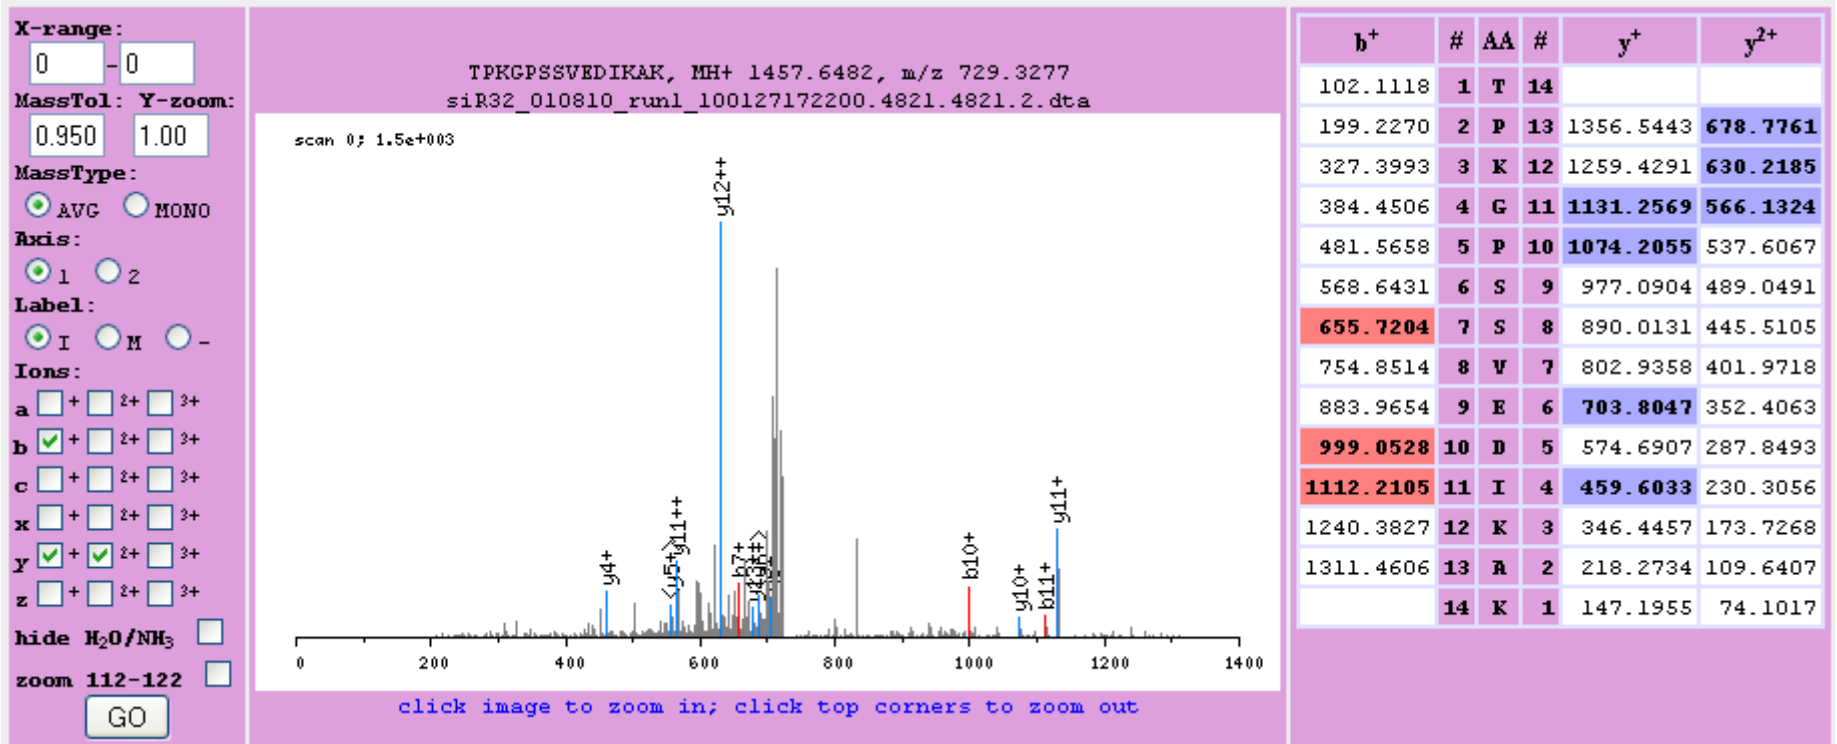

# EDVIINGHSHEDDNPFAEY

**X-range:**  
 -   
**MassTol:** **Y-zoom:**  
   
**MassType:**  
 AVG  MONO  
**Axis:**  
 1  2  
**Label:**  
 I  M  -  
**Ions:**  
a  +  2+  3+  
b  +  2+  3+  
c  +  2+  3+  
x  +  2+  3+  
y  +  2+  3+  
z  +  2+  3+  
hide H<sub>2</sub>O/NH<sub>3</sub>   
zoom 112-122

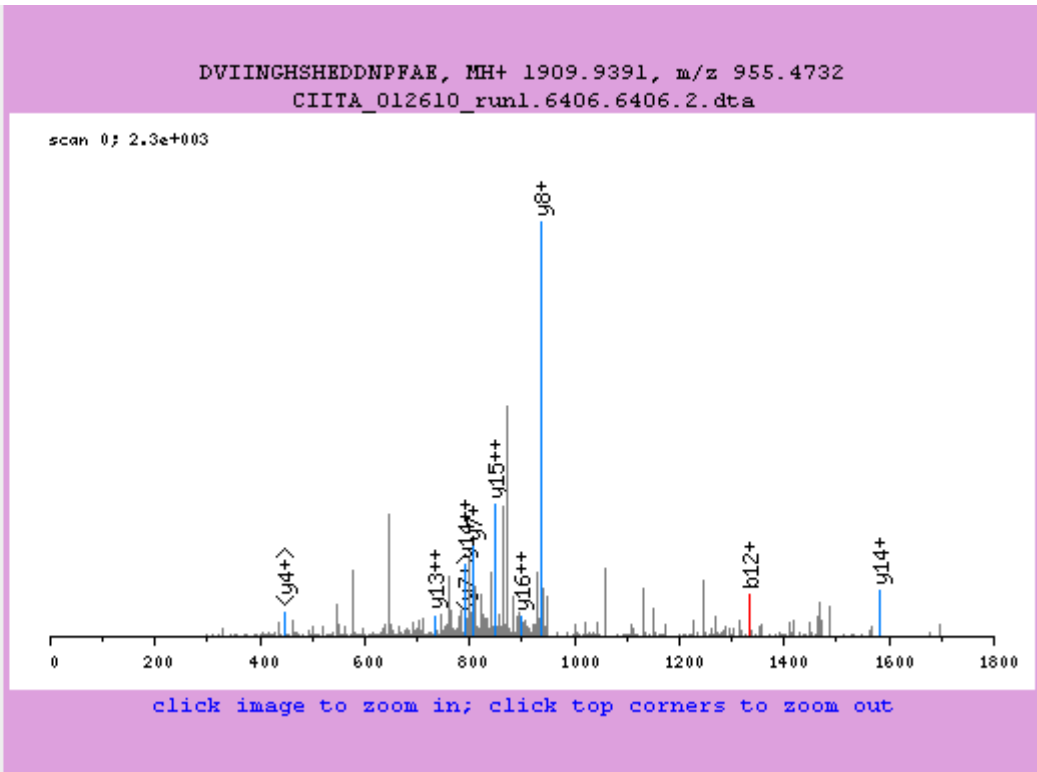

| b <sup>+</sup> | #  | AA | #  | y <sup>+</sup> | y <sup>2+</sup> |
|----------------|----|----|----|----------------|-----------------|
| 116.0953       | 1  | D  | 17 |                |                 |
| 215.2264       | 2  | V  | 16 | 1794.8517      | 897.9298        |
| 328.3840       | 3  | I  | 15 | 1695.7207      | 848.3643        |
| 441.5417       | 4  | I  | 14 | 1582.5630      | 791.7855        |
| 555.6443       | 5  | N  | 13 | 1469.4054      | 735.2067        |
| 612.6956       | 6  | G  | 12 | 1355.3027      | 678.1553        |
| 749.8349       | 7  | H  | 11 | 1298.2514      | 649.6297        |
| 836.9122       | 8  | S  | 10 | 1161.1121      | 581.0600        |
| 974.0515       | 9  | H  | 9  | 1074.0348      | 537.5214        |
| 1103.1655      | 10 | E  | 8  | 936.8956       | 468.9518        |
| 1218.2529      | 11 | D  | 7  | 807.7816       | 404.3948        |
| 1333.3403      | 12 | D  | 6  | 692.6942       | 346.8511        |
| 1447.4429      | 13 | N  | 5  | 577.6068       | 289.3074        |
| 1544.5581      | 14 | P  | 4  | 463.5041       | 232.2560        |
| 1691.7320      | 15 | F  | 3  | 366.3890       | 183.6985        |
| 1762.8099      | 16 | R  | 2  | 219.2151       | 110.1115        |
|                | 17 | E  | 1  | 148.1372       | 74.5726         |

# FRT**R**PS**L**L**S**AP**I**NS**V**LL**F**LM**G**M

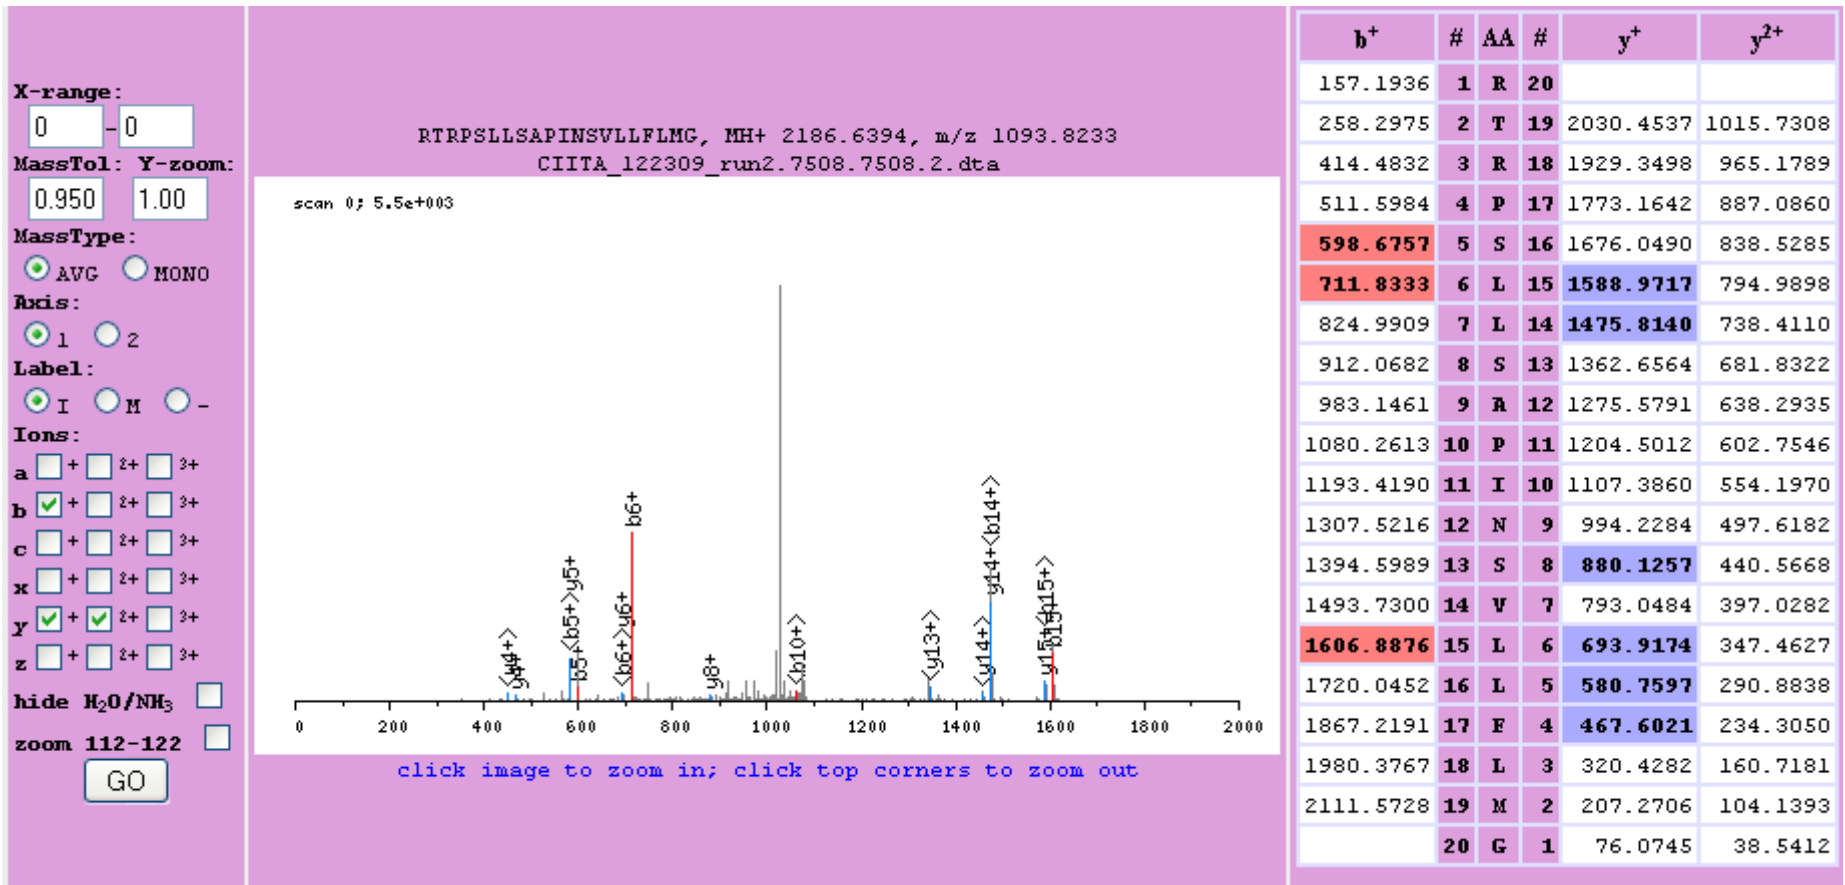



# KEYAIKLLAADAGKPPLNQS

**X-range:**  
 -

**MassTol:**  **Y-zoom:**

**MassType:**  
 AVG  MONO

**Axis:**  
 1  2

**Label:**  
 I  M  -

**Ions:**

a  +  2+  3+

b  +  2+  3+

c  +  2+  3+

x  +  2+  3+

y  +  2+  3+

z  +  2+  3+

hide H<sub>2</sub>O/NH<sub>3</sub>

zoom

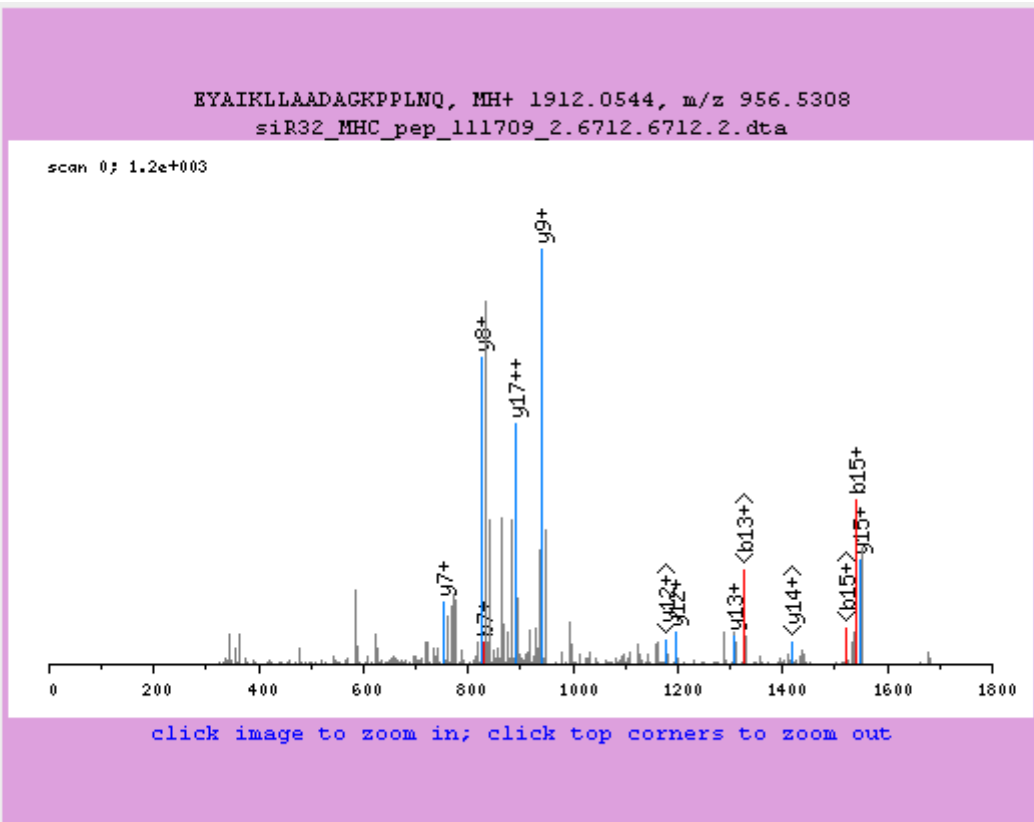

| b <sup>+</sup>   | #  | AA | #  | y <sup>+</sup>   | y <sup>2+</sup> |
|------------------|----|----|----|------------------|-----------------|
| 130.0504         | 1  | E  | 18 |                  |                 |
| 293.1137         | 2  | Y  | 17 | 1783.0118        | <b>892.0098</b> |
| 364.1509         | 3  | R  | 16 | 1619.9485        | 810.4781        |
| 477.2349         | 4  | I  | 15 | <b>1548.9114</b> | 774.9596        |
| 605.3299         | 5  | K  | 14 | 1435.8273        | 718.4176        |
| 718.4140         | 6  | L  | 13 | <b>1307.7323</b> | 654.3701        |
| <b>831.4980</b>  | 7  | L  | 12 | <b>1194.6483</b> | 597.8280        |
| 902.5351         | 8  | R  | 11 | 1081.5642        | 541.2860        |
| 973.5722         | 9  | R  | 10 | 1010.5271        | 505.7675        |
| 1088.5992        | 10 | D  | 9  | <b>939.4900</b>  | 470.2489        |
| 1159.6363        | 11 | R  | 8  | <b>824.4630</b>  | 412.7354        |
| 1216.6578        | 12 | G  | 7  | <b>753.4259</b>  | 377.2169        |
| 1344.7527        | 13 | K  | 6  | 696.4044         | 348.7061        |
| 1441.8055        | 14 | P  | 5  | 568.3095         | 284.6587        |
| <b>1538.8583</b> | 15 | P  | 4  | 471.2567         | 236.1323        |
| 1651.9423        | 16 | L  | 3  | 374.2040         | 187.6059        |
| 1765.9852        | 17 | N  | 2  | 261.1199         | 131.0639        |
|                  | 18 | Q  | 1  | 147.0770         | 74.0424         |

# GKFYLVIEELSQLFRSLVPIQL

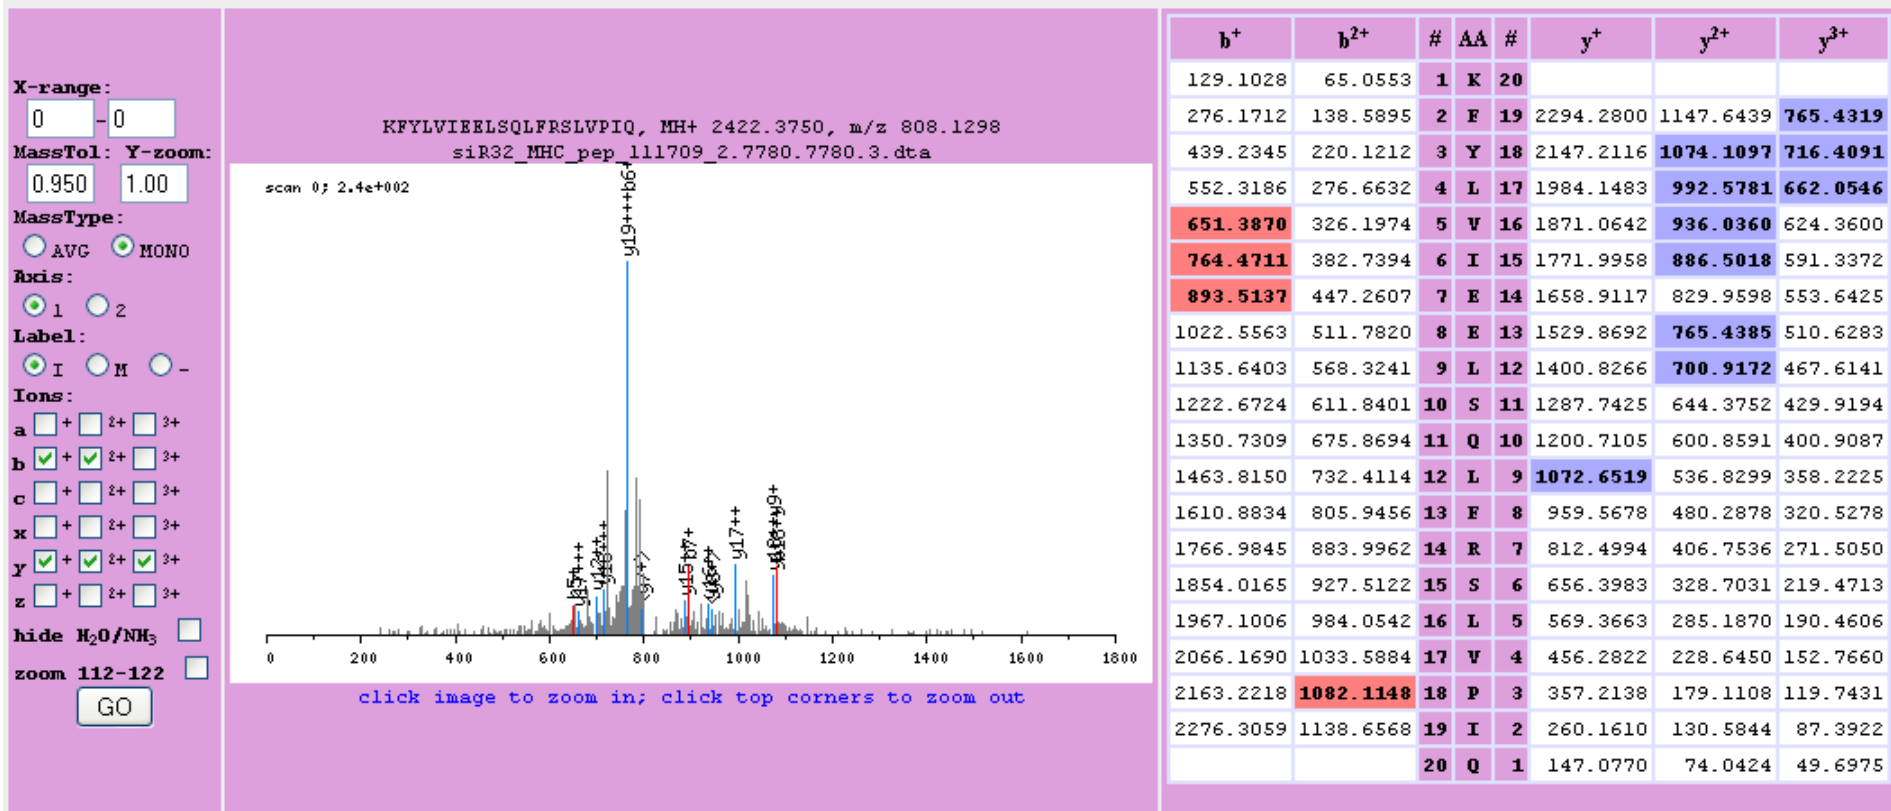

# LFDRTGDGKILY

X-range:

0 - 0

MassTol: Y-zoom:

0.950 1.00

MassType:

AVG  MONO

Axis:

1  2

Label:

I  M  -

Ions:

a  +  2+  3+

b  +  2+  3+

c  +  2+  3+

x  +  2+  3+

y  +  2+  3+

z  +  2+  3+

hide H<sub>2</sub>O/NH<sub>3</sub>

zoom 112-122

GO

FDRTGDGKIL, MH+ 1122.2516, m/z 1122.2516  
 CIITA\_012610\_run2\_100126154506.5763.5763.1.dta

scan #: 6.2e+003

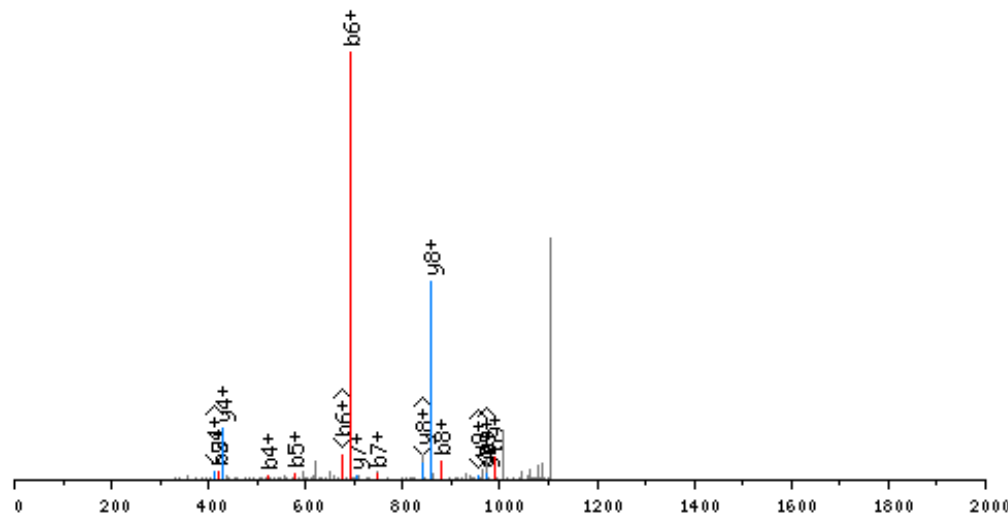

click image to zoom in; click top corners to zoom out

| b <sup>+</sup> | #  | AA | #  | y <sup>+</sup> |
|----------------|----|----|----|----------------|
| 148.1818       | 1  | F  | 10 |                |
| 263.2692       | 2  | D  | 9  | 975.0778       |
| 419.4549       | 3  | R  | 8  | 859.9904       |
| 520.5588       | 4  | T  | 7  | 703.8047       |
| 577.6101       | 5  | G  | 6  | 602.7008       |
| 692.6975       | 6  | D  | 5  | 545.6495       |
| 749.7488       | 7  | G  | 4  | 430.5621       |
| 877.9211       | 8  | K  | 3  | 373.5108       |
| 991.0787       | 9  | I  | 2  | 245.3385       |
|                | 10 | L  | 1  | 132.1809       |

# LMVTNDGATILKNIGVDNPAAKVLV

X-range:  -

MassTol:  Y-zoom:

MassType:  AVG  MONO

Axis:  1  2

Label:  I  M  -

Ions:

a  +  2+  3+

b  +  2+  3+

c  +  2+  3+

x  +  2+  3+

y  +  2+  3+

z  +  2+  3+

hide H<sub>2</sub>O/NH<sub>3</sub>

zoom 112-122

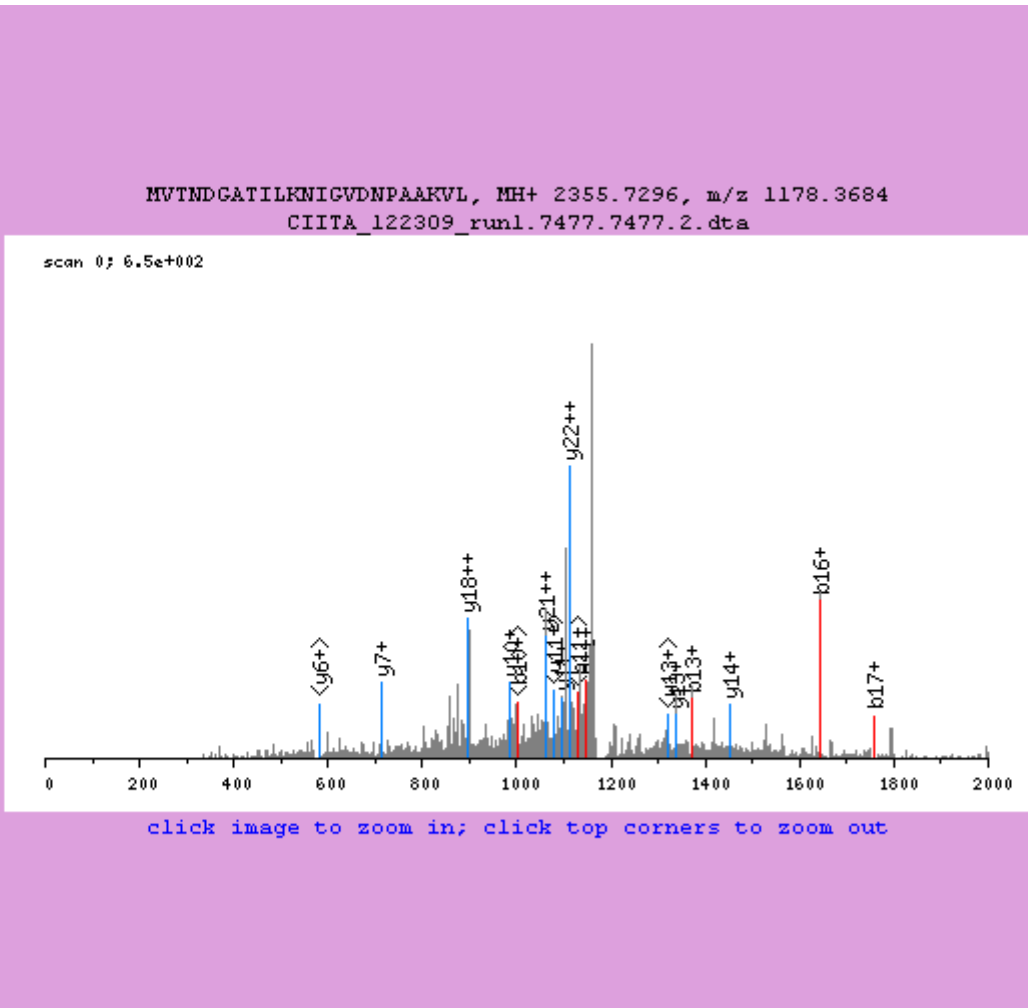

| b <sup>+</sup>   | #  | AA | #  | y <sup>+</sup>   | y <sup>2+</sup>  |
|------------------|----|----|----|------------------|------------------|
| 132.2040         | 1  | M  | 23 |                  |                  |
| 231.3351         | 2  | V  | 22 | 2224.5335        | <b>1112.7707</b> |
| 332.4389         | 3  | T  | 21 | 2125.4025        | <b>1063.2052</b> |
| 446.5416         | 4  | N  | 20 | 2024.2986        | 1012.6533        |
| 561.6290         | 5  | D  | 19 | 1910.1959        | 955.6019         |
| 618.6803         | 6  | G  | 18 | 1795.1085        | <b>898.0582</b>  |
| 689.7582         | 7  | R  | 17 | 1738.0572        | 869.5326         |
| 790.8621         | 8  | T  | 16 | 1666.9793        | 833.9936         |
| 904.0197         | 9  | I  | 15 | 1565.8754        | 783.4417         |
| 1017.1774        | 10 | L  | 14 | <b>1452.7178</b> | 726.8629         |
| <b>1145.3496</b> | 11 | K  | 13 | <b>1339.5602</b> | 670.2840         |
| 1259.4523        | 12 | N  | 12 | 1211.3879        | 606.1979         |
| <b>1372.6099</b> | 13 | I  | 11 | <b>1097.2852</b> | 549.1466         |
| 1429.6612        | 14 | G  | 10 | <b>984.1276</b>  | 492.5678         |
| 1528.7923        | 15 | V  | 9  | 927.0763         | 464.0421         |
| <b>1643.8797</b> | 16 | D  | 8  | 827.9452         | 414.4766         |
| <b>1757.9823</b> | 17 | N  | 7  | <b>712.8578</b>  | 356.9329         |
| 1855.0975        | 18 | P  | 6  | 598.7552         | 299.8816         |
| 1926.1754        | 19 | R  | 5  | 501.6400         | 251.3240         |
| 1997.2533        | 20 | R  | 4  | 430.5621         | 215.7850         |
| 2125.4256        | 21 | K  | 3  | 359.4842         | 180.2461         |
| 2224.5567        | 22 | V  | 2  | 231.3119         | 116.1599         |
|                  | 23 | L  | 1  | 132.1809         | 66.5944          |

# ELEEALANASDAELCDIAAILGMHTLM

X-range:

0 - 0

MassTol: Y-zoom:

0.950 1.00

MassType:

AVG  MONO

Axis:

1  2

Label:

I  M  -

Ions:

a  +  2+  3+

b  +  2+  3+

c  +  2+  3+

x  +  2+  3+

y  +  2+  3+

z  +  2+  3+

hide H<sub>2</sub>O/NH<sub>3</sub>

zoom 112-122

GO

LEEEALANASDAELCDIAAILGMHTL, MH+ 2584.2639, m/z 1292.6356  
 siR32\_MHC\_pep\_111709\_1.7217.7217.2.dta

scan 0; 1.3e+002

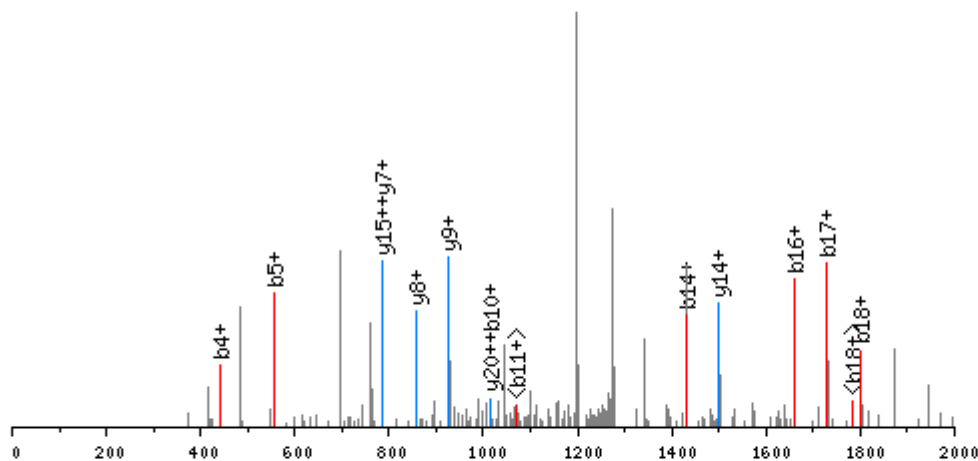

click image to zoom in; click top corners to zoom out

| b <sup>+</sup> | #  | AA | #  | y <sup>+</sup> | y <sup>2+</sup> |
|----------------|----|----|----|----------------|-----------------|
| 114.0919       | 1  | L  | 25 |                |                 |
| 243.1345       | 2  | E  | 24 | 2471.1798      | 1236.0938       |
| 372.1771       | 3  | E  | 23 | 2342.1372      | 1171.5725       |
| 443.2142       | 4  | R  | 22 | 2213.0946      | 1107.0512       |
| 556.2983       | 5  | L  | 21 | 2142.0575      | 1071.5327       |
| 627.3354       | 6  | R  | 20 | 2028.9734      | 1014.9906       |
| 741.3783       | 7  | N  | 19 | 1957.9363      | 979.4721        |
| 812.4154       | 8  | R  | 18 | 1843.8934      | 922.4506        |
| 899.4474       | 9  | S  | 17 | 1772.8563      | 886.9321        |
| 1014.4744      | 10 | D  | 16 | 1685.8243      | 843.4160        |
| 1085.5115      | 11 | R  | 15 | 1570.7973      | 785.9026        |
| 1214.5541      | 12 | E  | 14 | 1499.7602      | 750.3840        |
| 1327.6382      | 13 | L  | 13 | 1370.7176      | 685.8627        |
| 1430.6473      | 14 | C  | 12 | 1257.6335      | 629.3207        |
| 1545.6743      | 15 | D  | 11 | 1154.6244      | 577.8161        |
| 1658.7583      | 16 | I  | 10 | 1039.5974      | 520.3026        |
| 1729.7955      | 17 | R  | 9  | 926.5133       | 463.7606        |
| 1800.8326      | 18 | R  | 8  | 855.4762       | 428.2420        |
| 1913.9166      | 19 | I  | 7  | 784.4391       | 392.7235        |
| 2027.0007      | 20 | L  | 6  | 671.3551       | 336.1814        |
| 2084.0222      | 21 | G  | 5  | 558.2710       | 279.6394        |
| 2215.0626      | 22 | M  | 4  | 501.2495       | 251.1287        |
| 2352.1216      | 23 | H  | 3  | 370.2090       | 185.6084        |
| 2453.1692      | 24 | T  | 2  | 233.1501       | 117.0790        |
|                | 25 | L  | 1  | 132.1025       | 66.5551         |

# FFSETGAGKHVPRAV FV

**X-range:**  
 -

**MassTol:** **Y-zoom:**

**MassType:**  
 AVG  MONO

**Axis:**  
 1  2

**Label:**  
 I  M  -

**Ions:**

a  +  2+  3+

b  +  2+  3+

c  +  2+  3+

x  +  2+  3+

y  +  2+  3+

z  +  2+  3+

hide H<sub>2</sub>O/NH<sub>3</sub>

zoom 112-122

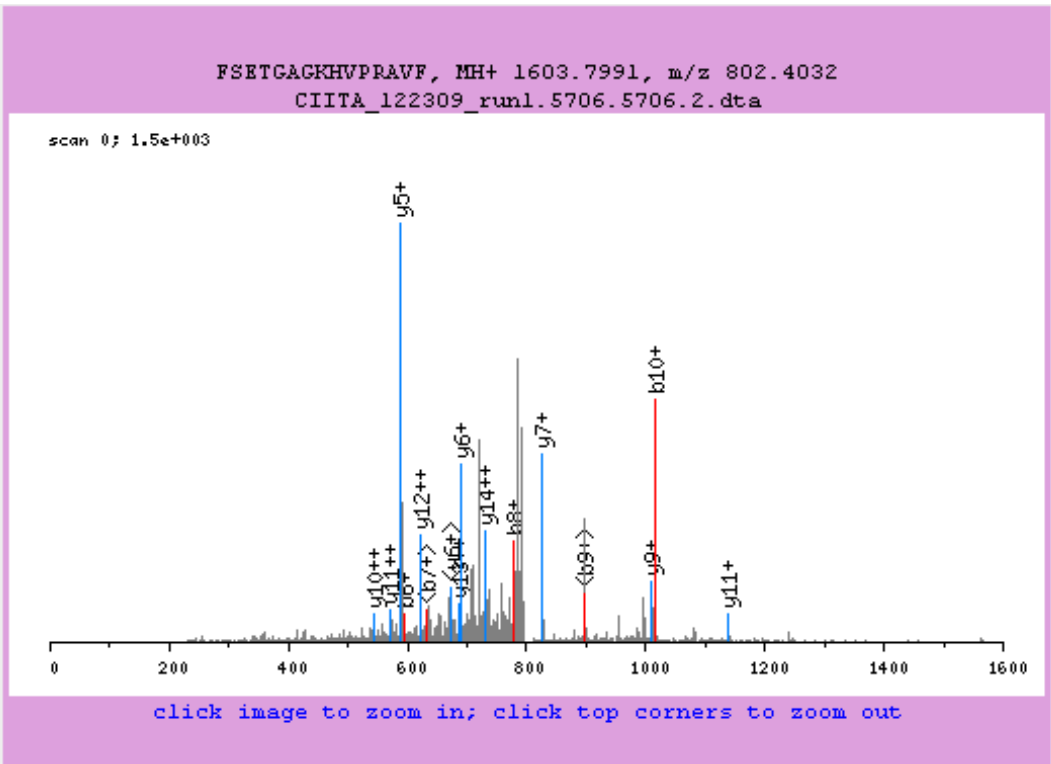

| b <sup>+</sup> | #  | AA | #  | y <sup>+</sup> | y <sup>2+</sup> |
|----------------|----|----|----|----------------|-----------------|
| 148.1818       | 1  | F  | 15 |                |                 |
| 235.2591       | 2  | S  | 14 | 1456.6252      | 728.8166        |
| 364.3731       | 3  | E  | 13 | 1369.5479      | 685.2779        |
| 465.4770       | 4  | T  | 12 | 1240.4339      | 620.7209        |
| 522.5283       | 5  | G  | 11 | 1139.3301      | 570.1690        |
| 593.6062       | 6  | R  | 10 | 1082.2787      | 541.6433        |
| 650.6575       | 7  | G  | 9  | 1011.2008      | 506.1044        |
| 778.8298       | 8  | K  | 8  | 954.1495       | 477.5787        |
| 915.9691       | 9  | H  | 7  | 825.9772       | 413.4926        |
| 1015.1001      | 10 | V  | 6  | 688.8380       | 344.9230        |
| 1112.2153      | 11 | P  | 5  | 589.7069       | 295.3574        |
| 1268.4010      | 12 | R  | 4  | 492.5917       | 246.7998        |
| 1339.4789      | 13 | R  | 3  | 336.4060       | 168.7070        |
| 1438.6099      | 14 | V  | 2  | 265.3281       | 133.1680        |
|                | 15 | F  | 1  | 166.1971       | 83.6025         |
