# Supplementary material
Source: PubMed Central journal article supplement (PMC3494186)
Supplement: supp_M112.019232_Supplemental_table_1_09-10-12.pdf [file supp_M112.019232_Supplemental_table_1_09-10-12.pdf]

**Supplemental Table 1.** Peptides identified from MCF10/DR7/CD80 and MCF10/DR7/CD80/li as a result of two individual affinity purification and four LC-MS/MS runs. Peptides unique to MCF10/DR7/CD80 are in red, peptides unique to MCF10/DR7/CD80/li are in blue and peptides present in both cell lines are in black. Probability of peptide identification is from Peptide Prophet analysis, Xcorr, charge and mass/charge ratio are from SEQUEST database search results. False discovery rate for this dataset was derived from Peptide Prophet analysis and is equal to 37%.

| Peptide Sequence             | Protein                                                                                      | IPI accession number                                                                     | Probability | Xcorr | Charge | Mass/charge ratio |
|------------------------------|----------------------------------------------------------------------------------------------|------------------------------------------------------------------------------------------|-------------|-------|--------|-------------------|
| FSITYKPVKHGRPGIGATHSSRF      | 40S ribosomal protein S15                                                                    | IPI00216153.7, IPI00479058.1                                                             | 0.9999      | 2.917 | 2      | 906.9649          |
| KKAPAQKVPAQKATGQKA           | 60S ribosomal protein L14                                                                    | IPI00002821.4, IPI00555744.6, IPI00749269.1                                              | 0.4061      | 2.113 | 2      | 1115.1646         |
| LAKGDRSEDFGVNEDLADSDARALY    | Annexin A1                                                                                   | IPI00218918.5                                                                            | 1           | 3.293 | 2      | 1125.7476         |
| TIIDAPGHRDFIKN               | Elongation factor 1 alpha 2                                                                  | IPI00478215.2                                                                            | 0.9999      | 3.509 | 2      | 1470.7088         |
| NLAHCLQIVCDWTDYDER           | Isoform 3 of UDP N acetylglucosamine peptide N acetylglucosaminyltransferase 110 kDa subunit | IPI00005780.3, IPI00219856.1, IPI00607723.1                                              | 0.3167      | 2.396 | 2      | 912.0905          |
| LMGKEGVHGGLINKKC             | Profilin 1                                                                                   | IPI00216691.5                                                                            | 0.0931      | 2.617 | 2      | 1079.2422         |
| FSRYSGSEGSTQTLTKGELKVLV      | Protein S100 P                                                                               | IPI00017526.1                                                                            | 0.9997      | 3.36  | 2      | 1209.8489         |
| KSSQPLASKQEKDGTEKRS          | 11 kDa protein                                                                               | IPI00141795.5, IPI00177716.7, IPI00179700.3, IPI00450855.1, IPI00744851.1, IPI00746310.3 | 1           | 3.607 | 2      | 1351.9371         |
| GLKAGLKCCLPTPPV              | 117 kDa protein                                                                              | IPI00304670.6, IPI00784499.2, IPI00787751.1                                              | 0.8693      | 2.635 | 2      | 921.5686          |
| MFQYNSTHGKHFHGTVKA           | 14 kDa protein                                                                               | IPI00744854.1                                                                            | 0.1892      | 2.655 | 2      | 1130.7475         |
| LYLKVKGNVFNKRIIL             | 18 kDa protein                                                                               | IPI00746706.1                                                                            | 0.1227      | 2.227 | 2      | 1007.1443         |
| LAADKQTLQSEQPLQVARC          | 26S protease regulatory subunit 7                                                            | IPI00021435.3                                                                            | 1           | 3.564 | 2      | 1226.7705         |
| DYHLHPPEIVPATLRRS            | 40S ribosomal protein S10                                                                    | IPI00008438.1, IPI00414852.2, IPI00478810.1                                              | 0.9965      | 2.628 | 2      | 888.5626          |
| MLMPKKNRIAIYEL               | 40S ribosomal protein S10                                                                    | IPI00008438.1, IPI00398673.3, IPI00478810.1, IPI00749512.1                               | 0.9997      | 2.786 | 2      | 920.5402          |
| MVAKKDVHMPKHPELADKNVNLHVMKAM | 40S ribosomal protein S10                                                                    | IPI00008438.1, IPI00025842.1, IPI00414852.2, IPI00478810.1, IPI00749512.1, IPI00787407.1 | 0.1139      | 2.796 | 3      | 1016.6045         |
| GVILRDSHGVAQVRF              | 40S ribosomal protein S13                                                                    | IPI00221089.5                                                                            | 1           | 3.425 | 2      | 983.166           |
| LRDSHGVAQVRF                 | 40S ribosomal protein S13                                                                    | IPI00221089.5                                                                            | 0.9832      | 2.762 | 2      | 1216.8876         |
| FNQVEIKPEMIGHYLGEFS          | 40S ribosomal protein S15                                                                    | IPI00216153.7, IPI00479058.1                                                             | 0.9966      | 3.485 | 2      | 806.4078          |
| YYQKYVDEASKKEIKDILI          | 40S ribosomal protein S16                                                                    | IPI00021793.1, IPI00176681.1                                                             | 1           | 4.714 | 2      | 918.0069          |
| EIAIIPSKLRNKIAGYVTHLM        | 40S ribosomal protein S17                                                                    | IPI00221093.7, IPI00414603.3, IPI00791157.1                                              | 1           | 4.359 | 2      | 1118.8694         |

|                                    |                                     |                                                                           |        |       |   |           |
|------------------------------------|-------------------------------------|---------------------------------------------------------------------------|--------|-------|---|-----------|
| MPGVTVKDVNQEF                      | 40S ribosomal protein S19           | IPI00215780.5, IPI00787105.1                                              | 0.9999 | 3.817 | 2 | 1112.2901 |
| FTKSPYQEFTDHLVKTHTRV               | 40S ribosomal protein S2            | IPI00013485.3, IPI00478002.1, IPI00479366.1, IPI00744451.3, IPI00827598.1 | 0.1326 | 2.417 | 2 | 722.8314  |
| FVGTKGIPHLVTHDART                  | 40S ribosomal protein S4, X isoform | IPI00217030.10, IPI00219894.5                                             | 0.9994 | 3.007 | 2 | 1095.8367 |
| FVIGKGNKPWISLPRGKGIRLT             | 40S ribosomal protein S4, X isoform | IPI00217030.10, IPI00219894.5                                             | 0.1582 | 3.025 | 2 | 1018.2114 |
| RIGVITNRERHPGSFDVVHVKDANGNSFA      | 40S ribosomal protein S4, X isoform | IPI00217030.10                                                            | 0.053  | 2.939 | 3 | 753.33    |
| KGSSNSYAIAKKKDELERV                | 40S ribosomal protein S5            | IPI00008433.4                                                             | 0.946  | 2.31  | 2 | 897.9756  |
| LVNAIINSGPREDSTRI                  | 40S ribosomal protein S5            | IPI00008433.4, IPI00479705.2                                              | 0.7024 | 2.72  | 2 | 828.9804  |
| RNNGKKLMTVRIVKHAFE                 | 40S ribosomal protein S5            | IPI00008433.4, IPI00555941.1                                              | 1      | 3.58  | 2 | 728.4483  |
| KIVKPNGEKPDEFESGISQA               | 40S ribosomal protein S7            | IPI00013415.1, IPI00478287.2, IPI00798077.1                               | 1      | 4.095 | 2 | 1080.1945 |
| KIVKPNGEKPDEFESGISQALL             | 40S ribosomal protein S7            | IPI00013415.1, IPI00478287.2                                              | 1      | 3.845 | 2 | 805.4065  |
| LVRELEKKFSGKHVVVF                  | 40S ribosomal protein S7            | IPI00013415.1, IPI00478287.2, IPI00796554.1, IPI00798077.1                | 0.4851 | 2.197 | 2 | 902.5678  |
| LVRELEKKFSGKHVVFI                  | 40S ribosomal protein S7            | IPI00013415.1, IPI00478287.2, IPI00796554.1, IPI00798077.1                | 0.9999 | 3.467 | 2 | 1003.6041 |
| FILLPKDVEDESTGLEKIEQLN             | 42 kDa protein                      | IPI00472082.2, IPI00783625.1                                              | 0.9182 | 2.769 | 2 | 892.5073  |
| DGKVVSETNDTKVLRH                   | 49 kDa protein                      | IPI00180956.6, IPI00240503.7, IPI00450768.7, IPI00747707.1, IPI00798387.1 | 1      | 3.652 | 2 | 842.4491  |
| KVVSETNDTKVLRH                     | 49 kDa protein                      | IPI00180956.6, IPI00240503.7, IPI00450768.7, IPI00747707.1, IPI00798387.1 | 0.8555 | 3.039 | 2 | 970.0394  |
| PTIVEEVQDGKVISSRE                  | 49 kDa protein                      | IPI00180956.6, IPI00240503.7, IPI00450768.7, IPI00747707.1, IPI00798387.1 | 1      | 3.718 | 2 | 1111.1447 |
| RIVDGKVVSETNDTKV                   | 49 kDa protein                      | IPI00180956.6, IPI00240503.7, IPI00450768.7, IPI00747707.1, IPI00798387.1 | 1      | 3.469 | 2 | 853.9715  |
| RRIVDGKVVSETNDTKV                  | 49 kDa protein                      | IPI00180956.6, IPI00240503.7, IPI00450768.7, IPI00747707.1, IPI00798387.1 | 1      | 3.743 | 2 | 767.3823  |
| RSLGSVQAPSYGARPVSSAASVYAGAGGSG SRI | 49 kDa protein                      | IPI00180956.6, IPI00240503.7, IPI00450768.7, IPI00747707.1, IPI00798387.1 | 1      | 4.853 | 2 | 1287.9728 |
| RRKEPKSQDIYLRL                     | 60S ribosomal protein L18           | IPI00215719.6                                                             | 0.3753 | 2.218 | 2 | 805.4564  |
| LYLKVKGNVFKNKRI                    | 60S ribosomal protein L19           | IPI00025329.1, IPI00746706.1                                              | 0.9985 | 2.983 | 2 | 911.1262  |

|                             |                               |                                                                                                                                                                                    |        |       |   |           |
|-----------------------------|-------------------------------|------------------------------------------------------------------------------------------------------------------------------------------------------------------------------------|--------|-------|---|-----------|
| MEHIHKLKADKARK              | 60S ribosomal protein L19     | IPI00025329.1, IPI00175212.6, IPI00788300.1                                                                                                                                        | 0.9994 | 3.117 | 2 | 662.2469  |
| RDLRGKKKEELLKQLDDLK         | 60S ribosomal protein L35     | IPI00412607.6, IPI00550247.2                                                                                                                                                       | 0.9507 | 2.761 | 2 | 1049.42   |
| AATKKPAPEKKPAEKKPTTEKKPAA   | 60S ribosomal protein L4      | IPI00003918.6, IPI00792159.1                                                                                                                                                       | 0.9467 | 2.89  | 3 | 902.387   |
| KAAATKKPAPEKKPAEKKPTTEKKPAA | 60S ribosomal protein L4      | IPI00003918.6, IPI00792159.1                                                                                                                                                       | 0.9861 | 4.301 | 3 | 998.6331  |
| KSDEKAAVAGKKPVVGKKG         | 60S ribosomal protein L4      | IPI00003918.6, IPI00792159.1                                                                                                                                                       | 1      | 4.438 | 2 | 665.2476  |
| LATVTKPVGGDKNGGTRV          | 60S ribosomal protein L6      | IPI00329389.8, IPI00741742.2, IPI00788908.1, IPI00790342.1, IPI00798169.1                                                                                                          | 0.8517 | 2.48  | 2 | 1140.72   |
| MAGEKVEKPDTEKKPEAKK         | 60S ribosomal protein L6      | IPI00329389.8, IPI00735235.1, IPI00742225.1, IPI00788908.1, IPI00789671.1, IPI00790342.1, IPI00797034.1, IPI00798169.1                                                             | 1      | 3.883 | 2 | 723.8451  |
| KVAPAPAVVKKQEAKK            | 60S ribosomal protein L7a     | IPI00299573.12, IPI00397676.4, IPI00478896.2, IPI00479315.2                                                                                                                        | 0.2394 | 1.806 | 2 | 749.8369  |
| LDVTTSEYEKEKLNRL            | 61 kDa protein                | IPI00472102.3, IPI00784154.1, IPI00794769.1                                                                                                                                        | 1      | 3.958 | 2 | 728.3229  |
| LKVGGSDEVNEKDD              | 61 kDa protein                | IPI00472102.3, IPI00784154.1, IPI00794769.1                                                                                                                                        | 0.9294 | 3.067 | 2 | 864.9895  |
| QDVANNTNEEAGDGGTTATVLARS    | 61 kDa protein                | IPI00472102.3, IPI00784154.1, IPI00790763.1, IPI00795445.1                                                                                                                         | 1      | 4.917 | 2 | 1056.6454 |
| KHAVSEGTKAVTQYTSSKI         | 7 kDa protein                 | IPI00746213.1                                                                                                                                                                      | 0.973  | 4.508 | 2 | 707.8855  |
| SLSAKPAPPKPEPKR             | 8 kDa protein                 | IPI00026060.2, IPI00217950.5, IPI00440673.1, IPI00455586.2, IPI00513867.3, IPI00741756.1                                                                                           | 0.9886 | 2.859 | 2 | 947.0621  |
| FIRGVVDEDLPLNISRE           | 85 kDa protein                | IPI00334775.6, IPI00382470.3, IPI00414676.6, IPI00514659.2, IPI00515119.3, IPI00604607.2, IPI00640129.2, IPI00746291.1, IPI00784295.2, IPI00789847.1, IPI00796258.1, IPI00796844.1 | 0.9199 | 4.378 | 2 | 897.0307  |
| LLTKAPLDPKA                 | Actin like protein (Fragment) | IPI00555675.1                                                                                                                                                                      | 0.0832 | 2.233 | 1 | 1093.3254 |
| LLTKAPLNPKANREKMTQIMF       | Actin like protein (Fragment) | IPI00555675.1                                                                                                                                                                      | 0.4057 | 2.731 | 2 | 905.0782  |
| LTLKYPIEHGIITNWDDMEKIWHHTFY | Actin, alpha skeletal muscle  | IPI00021428.1, IPI00023006.1, IPI00414057.2, IPI00515047.1                                                                                                                         | 0.9994 | 3.236 | 3 | 891.6936  |
| GVMVGMGQKDSYVGDEAQSKR       | Actin, aortic smooth muscle   | PI00008603.1, IPI00021428.1, IPI00021439.1, IPI00021440.1, IPI00023006.1, IPI00025416.3, IPI00414057.2, IPI00514530.4,                                                             | 1      | 4.375 | 2 | 1093.7315 |

|                        |                             |                                                                                                                                                                                                                                         |        |       |   |           |
|------------------------|-----------------------------|-----------------------------------------------------------------------------------------------------------------------------------------------------------------------------------------------------------------------------------------|--------|-------|---|-----------|
|                        |                             | IPI00515047.1, IPI00645534.1,<br>IPI00790339.1, IPI00796881.1                                                                                                                                                                           |        |       |   |           |
| GVMVGMGQKDSYVGDEAQSKRG | Actin, aortic smooth muscle | PI00008603.1, IPI00021428.1,<br>IPI00021439.1, IPI00021440.1,<br>IPI00023006.1, IPI00025416.3,<br>IPI00414057.2, IPI00514530.4,<br>IPI00515047.1, IPI00645534.1,<br>IPI00790339.1, IPI00796881.1                                        | 1      | 5.067 | 2 | 817.9129  |
| KDSYVGDEAQSKRG         | Actin, aortic smooth muscle | IPI00008603.1, IPI00021428.1,<br>IPI00021439.1, IPI00021440.1,<br>IPI00023006.1, IPI00025416.3,<br>IPI00414057.2, IPI00514530.4,<br>IPI00515047.1, IPI00645534.1,<br>IPI00790339.1, IPI00796881.1                                       | 0.9499 | 2.122 | 2 | 1154.9102 |
| KEITALAPSTMKIKIIPPERKY | Actin, aortic smooth muscle | IPI00008603.1, IPI00021428.1,<br>IPI00021439.1, IPI00021440.1,<br>IPI00023006.1, IPI00025416.3,<br>IPI00414057.2, IPI00514530.4,<br>IPI00515047.1, IPI00794523.2                                                                        | 0.9905 | 3.022 | 2 | 957.107   |
| LLTEAPLNPKANREKM       | Actin, aortic smooth muscle | IPI00008603.1, IPI00021428.1,<br>IPI00021439.1, IPI00021440.1,<br>IPI00023006.1, IPI00025416.3,<br>IPI00414057.2, IPI00514530.4,<br>IPI00555733.1, IPI00555900.1,<br>IPI00556212.1, IPI00645534.1,<br>IPI00655798.3, IPI00736769.2,     | 0.7461 | 3.555 | 2 | 971.6186  |
| LLTEAPLNPKANREKMTQI    | Actin, aortic smooth muscle | IPI00008603.1, IPI00021428.1,<br>IPI00021439.1, IPI00021440.1,<br>IPI00023006.1, IPI00025416.3,<br>IPI00414057.2, IPI00514530.4,<br>IPI00555733.1, IPI00555900.1,<br>IPI00556212.1, IPI00645534.1,<br>IPI00655798.3, IPI00736769.2,     | 0.2016 | 2.704 | 2 | 1093.7962 |
| LLTEAPLNPKANREKMTQIMF  | Actin, aortic smooth muscle | IPI00008603.1, IPI00021428.1,<br>IPI00021439.1, IPI00021440.1,<br>IPI00023006.1, IPI00025416.3,<br>IPI00414057.2, IPI00514530.4,<br>IPI00555733.1, IPI00555900.1,<br>IPI00556212.1, IPI00645534.1,<br>IPI00655798.3, IPI00736769.2, IPI | 0.957  | 4.132 | 2 | 983.1867  |

|                           |                             |                                                                                                                                                                                    |        |       |   |           |
|---------------------------|-----------------------------|------------------------------------------------------------------------------------------------------------------------------------------------------------------------------------|--------|-------|---|-----------|
| LTLKYPIEHGIITNWDDM        | Actin, aortic smooth muscle | IPI00008603.1, IPI00021428.1, IPI00023006.1, IPI00025416.3, IPI00414057.2, IPI00515047.1, IPI00645534.1, IPI00816229.1                                                             | 0.9679 | 2.716 | 2 | 1024.1635 |
| LTLKYPIEHGIITNWDDME       | Actin, aortic smooth muscle | IPI00008603.1, IPI00021428.1, IPI00023006.1, IPI00025416.3, IPI00414057.2, IPI00515047.1, IPI00645534.1, IPI00816229.1                                                             | 0.9969 | 2.704 | 2 | 1152.8073 |
| LTLKYPIEHGIITNWDDMEKI     | Actin, aortic smooth muscle | IPI00008603.1, IPI00021428.1, IPI00023006.1, IPI00025416.3, IPI00414057.2, IPI00515047.1, IPI00645534.1, IPI00816229.1                                                             | 1      | 3.31  | 2 | 1042.8499 |
| RHQGVMVGMGQKDSYVGDEAQSQR  | Actin, aortic smooth muscle | IPI00008603.1, IPI00021428.1, IPI00021439.1, IPI00021440.1, IPI00023006.1, IPI00025416.3, IPI00414057.2, IPI00514530.4, IPI00515047.1, IPI00645534.1, IPI00790339.1, IPI00796881.1 | 1      | 5.04  | 2 | 1254.8921 |
| RHQGVMVGMGQKDSYVGDEAQSQRG | Actin, aortic smooth muscle | IPI00008603.1, IPI00021428.1, IPI00021439.1, IPI00021440.1, IPI00023006.1, IPI00025416.3, IPI00414057.2, IPI00514530.4, IPI00515047.1, IPI00645534.1, IPI00790339.1, IPI00796881.1 | 1      | 4.983 | 2 | 989.7542  |
| TALAPSTMKIKIIPPERKY       | Actin, aortic smooth muscle | IPI00008603.1, IPI00021428.1, IPI00021439.1, IPI00021440.1, IPI00023006.1, IPI00025416.3, IPI00414057.2, IPI00514530.4, IPI00515047.1, IPI00794523.2                               | 1      | 4.465 | 2 | 1108.3475 |
| TALAPSTMKIKIIPPERKYSV     | Actin, aortic smooth muscle | IPI00008603.1, IPI00021428.1, IPI00021439.1, IPI00021440.1, IPI00023006.1, IPI00025416.3, IPI00414057.2, IPI00514530.4, IPI00515047.1, IPI00794523.2                               | 1      | 5.085 | 2 | 935.5522  |
| ELRVAPEEHPVLL             | Actin, cytoplasmic 1        | IPI00021439.1, IPI00021440.1, IPI00555733.1, IPI00556391.1, IPI00655798.3, IPI00739539.2, IPI00790339.1, IPI00796881.1                                                             | 0.4847 | 2.052 | 2 | 630.359   |
| GIVTNWDDMEKIWHHTFY        | Actin, cytoplasmic 1        | IPI00021439.1, IPI00021440.1, IPI00790339.1, IPI00796881.1                                                                                                                         | 1      | 3.799 | 2 | 671.3595  |

|                               |                                       |                                                                                                                                                       |        |       |   |           |
|-------------------------------|---------------------------------------|-------------------------------------------------------------------------------------------------------------------------------------------------------|--------|-------|---|-----------|
| ISKQEYDESGPSIVHRKC            | Actin, cytoplasmic 1                  | IPI00021439.1, IPI00021440.1, IPI00555900.1, IPI00738655.2, IPI00739539.2, IPI00740545.1, IPI00748022.1, IPI00786945.1, IPI00794523.2                 | 0.994  | 2.897 | 2 | 915.0278  |
| LRVAPEEHPVLL                  | Actin, cytoplasmic 1                  | IPI00021439.1, IPI00021440.1, IPI00555733.1, IPI00556391.1, IPI00655798.3, IPI00739539.2, IPI00790339.1, IPI00796881.1                                | 1      | 2.331 | 1 | 716.8085  |
| LYASGRRTTGIVMDSGDGVTHTVPIYEGY | Actin, cytoplasmic 1                  | IPI00019502.3, IPI00556012.1                                                                                                                          | 1      | 4.166 | 2 | 910.9695  |
| MWISKQEYDESGPSIVHRK           | Actin, cytoplasmic 1                  | IPI00021439.1, IPI00021440.1, IPI00555900.1, IPI00738655.2, IPI00739539.2, IPI00740545.1, IPI00748022.1, IPI00786945.1, IPI00794523.2                 | 1      | 5.623 | 2 | 1080.691  |
| MWISKQEYDESGPSIVHRKC          | Actin, cytoplasmic 1                  | IPI00021439.1, IPI00021440.1, IPI00555900.1, IPI00738655.2, IPI00739539.2, IPI00740545.1, IPI00748022.1, IPI00786945.1, IPI00794523.2                 | 1      | 5.63  | 2 | 1081.6989 |
| SGRTTGIVMDSGDGVTHTVPIYEGY     | Actin, cytoplasmic 1                  | IPI00021439.1, IPI00021440.1, IPI00555675.1, IPI00655798.3, IPI00739369.2, IPI00739539.2, IPI00748022.1, IPI00786945.1, IPI00794523.2, IPI00807522.1  | 0.993  | 2.886 | 2 | 793.4612  |
| WISKQEYDESGPSIVHRK            | Actin, cytoplasmic 1                  | IPI00021439.1, IPI00021440.1, IPI00555900.1, IPI00738655.2, IPI00739539.2, IPI00740545.1, IPI00748022.1, IPI00786945.1, IPI00794523.2                 | 1      | 6.238 | 2 | 987.5855  |
| WISKQEYDESGPSIVHRKC           | Actin, cytoplasmic 1                  | IPI00021439.1, IPI00021440.1, IPI00555900.1, IPI00738655.2, IPI00739539.2, IPI00740545.1, IPI00748022.1, IPI00786945.1, IPI00794523.2                 | 1      | 3.682 | 2 | 1218.3016 |
| RAVGRLEAVSHTSDMHRG            | Adenylyl cyclase associated protein 1 | IPI00008274.7, IPI00514858.1, IPI00639931.1, IPI00641881.1, IPI00642414.1, IPI00643567.1, IPI00644109.1, IPI00644589.1, IPI00645789.1, IPI00646269.1, | 0.9139 | 3.13  | 2 | 737.8229  |

|                                      |                                                    |                                                                                                         |        |       |   |           |
|--------------------------------------|----------------------------------------------------|---------------------------------------------------------------------------------------------------------|--------|-------|---|-----------|
|                                      |                                                    | IPI00646869.1, IPI00647351.1                                                                            |        |       |   |           |
| QETIDKTANQASDTFSGIGKKF               | Adipose most abundant gene transcript 2            | IPI00020017.1, IPI00644556.2                                                                            | 0.9775 | 2.747 | 2 | 1249.9029 |
| FNVINGGSHAGNKLAMQE                   | Alpha enolase, lung specific                       | IPI00013769.1, IPI00216171.3, IPI00218474.5, IPI00465248.5, IPI00759806.1, IPI00792715.1                | 1      | 4.588 | 2 | 870.9651  |
| FNVINGGSHAGNKLAMQEF                  | Alpha enolase, lung specific                       | IPI00013769.1, IPI00216171.3, IPI00218474.5, IPI00465248.5, IPI00759806.1, IPI00792715.1                | 1      | 3.394 | 2 | 944.5525  |
| FNVINGGSHAGNKLAMQEFM                 | Alpha enolase, lung specific                       | IPI00013769.1, IPI00216171.3, IPI00218474.5, IPI00465248.5, IPI00759806.1, IPI00792715.1                | 1      | 4.332 | 2 | 976.0464  |
| KNVIKEKYGDATNVGDEGGFAPNILE           | Alpha enolase, lung specific                       | IPI00013769.1, IPI00465248.5, IPI00759806.1                                                             | 1      | 3.772 | 2 | 857.0113  |
| KYGKDATNVGDEGGFAPNILE                | Alpha enolase, lung specific                       | IPI00013769.1, IPI00216171.3, IPI00218474.5, IPI00465248.5, IPI00759806.1, IPI00791564.1, IPI00792715.1 | 0.9981 | 2.809 | 2 | 942.5455  |
| FAEKLHQAMKGVGTRHKALI                 | Annexin A1                                         | IPI00218918.5                                                                                           | 1      | 3.902 | 2 | 655.3353  |
| FFAEKLHQAMKGVGTRHKALI                | Annexin A1                                         | IPI00218918.5                                                                                           | 1      | 4.525 | 2 | 1011.6636 |
| KGGPGSAVSPYPTFNPSSDVAALHKAIMVKGVDEAT | Annexin A1                                         | IPI00218918.5, IPI00549413.2, IPI00643231.1                                                             | 1      | 3.836 | 3 | 1072.4402 |
| LKRDLAKDITSDTSGDFRNALL               | Annexin A1                                         | IPI00218918.5, IPI00549413.2                                                                            | 1      | 3.425 | 2 | 745.8242  |
| LYKAGENRWGTDEDKFT                    | Annexin A3                                         | IPI00024095.3, IPI00745868.2                                                                            | 0.6796 | 2.242 | 2 | 797.9679  |
| AYELKHALKGAGTNEKVL                   | Annexin A5                                         | IPI00329801.12, IPI00793236.1                                                                           | 0.9996 | 2.769 | 2 | 936.5825  |
| FRFGAPPHAGGGIGLERV                   | Aspartyl tRNA synthetase, cytoplasmic              | IPI00216951.2                                                                                           | 0.9995 | 3.362 | 2 | 1057.1602 |
| EFKANAECTSGSNVIVKVKKE                | ATP synthase epsilon chain, mitochondrial          | IPI00215878.6                                                                                           | 0.9954 | 5.199 | 2 | 769.5684  |
| AVAKADKLAEEHSS                       | ATP synthase subunit beta, mitochondrial precursor | IPI00303476.1, IPI00792128.1, IPI00792534.1, IPI00793851.1                                              | 0.9999 | 2.942 | 2 | 693.2562  |
| FTGHMGKLVPLKETIKGFQ                  | ATP synthase subunit beta, mitochondrial precursor | IPI00303476.1, IPI00789157.1, IPI00790385.1, IPI00792128.1, IPI00792534.1                               | 1      | 3.689 | 2 | 686.266   |
| STPTLPTDTFQTVETLTCLSLERNRL           | Bardet Biedl syndrome 10 protein                   | IPI00742775.1                                                                                           | 0.979  | 3     | 3 | 926.5221  |

|                                         |                                                                         |                                                                                                         |        |       |   |           |
|-----------------------------------------|-------------------------------------------------------------------------|---------------------------------------------------------------------------------------------------------|--------|-------|---|-----------|
| AAAPAESAAPAAGEEPSKEEGEPKK               | Brain acid soluble protein 1                                            | IPI00299024.9                                                                                           | 0.1589 | 2.678 | 2 | 1112.6658 |
| KKTEAPAAPAAQETKSDGAPASDSK               | Brain acid soluble protein 1                                            | IPI00299024.9                                                                                           | 0.6532 | 2.404 | 2 | 952.7311  |
| LNLKTPVPSDIDISRS                        | C 1 tetrahydrofolate synthase, cytoplasmic                              | IPI00218342.10, IPI00794900.1                                                                           | 0.9987 | 2.741 | 2 | 675.7557  |
| RKVVGDVAYDEAKERA                        | C 1 tetrahydrofolate synthase, cytoplasmic                              | IPI00218342.10, IPI00794900.1                                                                           | 1      | 3.404 | 2 | 976.1526  |
| RVERIMSETYMLIKQVDE                      | Calcineurin binding protein Cabin 1                                     | IPI00002355.1, IPI00184409.6                                                                            | 0.0842 | 2.257 | 2 | 870.052   |
| TRGAARAAVSPAGGARSAPARATAAPRRAA<br>THRPA | CDNA FLJ90577 fis, clone OVARC1002058, highly similar to Human 18S rRNA | IPI00384007.1                                                                                           | 0.9993 | 4.164 | 3 | 585.2032  |
| PSRPLTFMGSQTKRV                         | Cell death inducing DFFA like effector a isoform 2                      | IPI00384386.4, IPI00646443.1                                                                            | 0.3488 | 1.822 | 2 | 830.9291  |
| TRVALLEQQVLI                            | Centrosomal protein 55kDa                                               | IPI00478215.2                                                                                           | 0.4764 | 2.469 | 2 | 1083.738  |
| LRHQNLKELQDLALQGAKERAH                  | Chromogranin A precursor                                                | IPI00290315.3, IPI00383975.1, IPI00746813.1                                                             | 0.0655 | 2.729 | 2 | 923.5214  |
| DFIKSELKKAGGANYDAQTE                    | Coactosin like protein                                                  | IPI00017704.3                                                                                           | 1      | 3.767 | 2 | 1036.1418 |
| LYDATYETKESKEDLV                        | Cofilin 1                                                               | IPI00012011.6, IPI00413344.3, IPI00784459.1, IPI00796024.1                                              | 1      | 3.488 | 2 | 799.9284  |
| IWLPLLGPQEGLGQEPGHL                     | Cyclin dependent kinase 10 isoform 3 variant (Fragment)                 | IPI00556339.1                                                                                           | 0.9915 | 2.602 | 2 | 949.7725  |
| YLKSHHGEHERPEFI                         | Cytochrome c oxidase polypeptide VIa liver, mitochondrial precursor     | IPI00021793.1, IPI00176681.1                                                                            | 0.9952 | 2.256 | 2 | 738.4019  |
| FITVHTPLLSTGLLNDN                       | D 3 phosphoglycerate dehydrogenase                                      | IPI00011200.5, IPI00642548.2                                                                            | 0.9882 | 2.646 | 2 | 1386.45   |
| GLLKEASKQADVNLVNAKL                     | D 3 phosphoglycerate dehydrogenase                                      | IPI00011200.5, IPI00642548.2                                                                            | 1      | 3.816 | 2 | 620.7224  |
| LLKEASKQADVNLVNAKL                      | D 3 phosphoglycerate dehydrogenase                                      | IPI00011200.5, IPI00642548.2                                                                            | 1      | 3.657 | 2 | 1385.5352 |
| YLLKNKAQFEDRN                           | Dpy 30 like protein                                                     | IPI00028109.1                                                                                           | 0.8471 | 2.634 | 2 | 1036.1833 |
| RTYNRVPLHKPTDWQKKILI                    | E2 induced gene 5 protein                                               | IPI00023001.2, IPI00795180.1                                                                            | 0.9996 | 3.466 | 2 | 676.3826  |
| GWKVTRKDGNASGTTLL                       | EEF1A1 protein                                                          | IPI00025447.7, IPI00180730.1, IPI00396485.3, IPI00455434.1, IPI00472724.1, IPI00655692.1, IPI00793363.1 | 0.9999 | 2.805 | 2 | 798.4357  |
| NMLEPSANMPWFKGWKV                       | EEF1A1 protein                                                          | IPI00025447.7, IPI00180730.1, IPI00396485.3, IPI00455434.1, IPI00472724.1, IPI00655692.1, IPI00793363.1 | 0.9999 | 3.648 | 2 | 787.3903  |
| NVAGDSKNDPPMEAAGFTAQV                   | EEF1A1 protein                                                          | IPI00025447.7, IPI00180730.1, IPI00396485.3, IPI00455434.1, IPI00472724.1, IPI00655692.1,               | 1      | 3.439 | 2 | 915.5641  |



|                             |                                                       |                                                                                                                        |        |       |   |           |
|-----------------------------|-------------------------------------------------------|------------------------------------------------------------------------------------------------------------------------|--------|-------|---|-----------|
|                             |                                                       | IPI00793363.1                                                                                                          |        |       |   |           |
| QTVAVGVKAVDKKA              | EEF1A1 protein                                        | IPI00025447.7, IPI00180730.1, IPI00396485.3, IPI00455434.1, IPI00472724.1, IPI00655692.1, IPI00793363.1                | 0.9977 | 3.458 | 2 | 786.9826  |
| RGNVAGDSKNDPPMEAAGFTAQV     | EEF1A1 protein                                        | IPI00025447.7, IPI00180730.1, IPI00396485.3, IPI00455434.1, IPI00472724.1, IPI00655692.1, IPI00793363.1                | 1      | 4.302 | 2 | 1176.799  |
| RQTVAVGVKAVDKKA             | EEF1A1 protein                                        | IPI00025447.7, IPI00180730.1, IPI00396485.3, IPI00455434.1, IPI00472724.1, IPI00655692.1, IPI00793363.1                | 0.9999 | 3.418 | 2 | 831.4231  |
| YIKKIGYNPDTVAF              | EEF1A1 protein                                        | IPI00025447.7, IPI00180730.1, IPI00396485.3, IPI00455434.1, IPI00472724.1, IPI00655692.1, IPI00793363.1                | 0.9944 | 2.639 | 2 | 754.8327  |
| YKIGGIGTVPVGRVETGVLKPGMVVTF | EEF1A1 protein                                        | IPI00025447.7, IPI00180730.1, IPI00396485.3, IPI00455434.1, IPI00472724.1, IPI00655692.1, IPI00793363.1                | 0.9992 | 3.245 | 2 | 1027.1805 |
| AAGVGEFEAGISKNGQTRHALLA     | Elongation factor 1 alpha 2                           | IPI00014424.1, IPI00180730.1, IPI00396485.3, IPI00472724.1, IPI00556204.1, IPI00641459.2, IPI00793363.1, IPI00796933.1 | 0.9995 | 3.043 | 2 | 1143.2547 |
| QTVAVGVIKN                  | Elongation factor 1 alpha 2                           | IPI00014424.1, IPI00025447.7, IPI00180730.1, IPI00382804.1, IPI00396485.3, IPI00472724.1                               | 0.1639 | 1.254 | 1 | 934.5236  |
| RTIEKFEKEAAEMGKG            | Elongation factor 1 alpha 2                           | IPI00014424.1, IPI00396485.3, IPI00431701.2, IPI00472724.1, IPI00641459.2, IPI00793363.1, IPI00796933.1                | 1      | 3.87  | 2 | 1119.8135 |
| RVAVEAKNPADLPKL             | Elongation factor 2                                   | IPI00186290.6                                                                                                          | 0.9648 | 3.105 | 2 | 978.662   |
| LPVGAANFR                   | ENO1P protein                                         | IPI00328587.4, IPI00465248.5, IPI00759806.1                                                                            | 0.9215 | 1.609 | 1 | 1163.8207 |
| RYMGKGVSKP                  | ENO1P protein                                         | IPI00328587.4, IPI00465248.5                                                                                           | 1      | 1.964 | 1 | 596.2492  |
| NVGKLLKGIDRYNPENLA          | Eukaryotic translation initiation factor 3 subunit 12 | IPI00033143.1                                                                                                          | 0.9977 | 2.734 | 2 | 1249.4338 |

|                              |                                                                   |                                                                                                                                                                                                                       |        |       |   |           |
|------------------------------|-------------------------------------------------------------------|-----------------------------------------------------------------------------------------------------------------------------------------------------------------------------------------------------------------------|--------|-------|---|-----------|
| KIKIAPPKRKYSV                | FKSG30                                                            | IPI00555900.1                                                                                                                                                                                                         | 0.1554 | 2.54  | 2 | 988.0763  |
| TPSALAIENANVLARYASICQNGIVPIV | Fructose bisphosphate aldolase C                                  | IPI00418262.4                                                                                                                                                                                                         | 0.9398 | 2.822 | 2 | 1093.8965 |
| YKQPGGITNQFLDLSLKHRE         | Fucosyltransferase 11                                             | IPI00217759.2, IPI00647266.1                                                                                                                                                                                          | 0.8114 | 3.003 | 2 | 802.3651  |
| LRVRGEVAPDAKSFV              | Galectin 1                                                        | IPI00219219.3                                                                                                                                                                                                         | 0.9993 | 2.763 | 2 | 866.9183  |
| QWLGSSWPGYVRPLPPAAIESP       | Heat shock protein beta 1                                         | IPI00025512.2                                                                                                                                                                                                         | 0.0737 | 2.013 | 2 | 1204.2709 |
| LRQKAEADKNDKSVKDLV           | Heat shock protein HSP 90 alpha 2                                 | IPI00382470.3, IPI00604607.2, IPI00784295.2, IPI00789847.1                                                                                                                                                            | 1      | 3.867 | 2 | 1162.8135 |
| LKQVHPDTGISSKA               | Histone H2B type 2 E                                              | IPI00003935.6, IPI00018534.4, IPI00020101.9, IPI00152785.3, IPI00152906.6, IPI00166293.5, IPI00220403.3, IPI00303133.8, IPI00329665.8, IPI00419833.7, IPI00465363.3, IPI00477495.3, IPI00515061.3, IPI00554798.2,     | 1      | 3.297 | 2 | 1001.6564 |
| LKQVHPDTGISSKAMGIMNSF        | Histone H2B type 2 E                                              | IPI00003935.6, IPI00018534.4, IPI00020101.9, IPI00152785.3, IPI00152906.6, IPI00166293.5, IPI00220403.3, IPI00303133.8, IPI00329665.8, IPI00419833.7, IPI00477495.3, IPI00515061.3, IPI00554798.2, IPI00719084.4, IPI | 1      | 4.012 | 2 | 1112.7122 |
| DMAKKEVWRLEEF                | HLA class II histocompatibility antigen, DR alpha chain precursor | IPI00005171.1, IPI00464948.3, IPI00645572.1, IPI00647215.2, IPI00785143.1                                                                                                                                             | 0.8148 | 2.553 | 2 | 760.893   |
| FIKGVRSNAEERR                | HLA class II histocompatibility antigen, DR alpha chain precursor | IPI00005171.1, IPI00647215.2, IPI00719648.1                                                                                                                                                                           | 0.9797 | 2.446 | 2 | 998.5619  |
| LIGRTWNPSPVQQDIKFLP          | HSPA5 protein                                                     | IPI00003362.2                                                                                                                                                                                                         | 0.9501 | 2.842 | 2 | 772.8912  |
| LMTTVHAITATQKTVDGSPGKLWRD    | Hypothetical poetin                                               | IPI00219018.7, IPI00788737.1, IPI00789134.1, IPI00793922.1, IPI00795257.1, IPI00797221.1                                                                                                                              | 1      | 4.786 | 2 | 778.3826  |
| DESTGSIAKRLQSIGTENTEENRRFY   | Hypothetical protein                                              | IPI00465439.5, IPI00791070.1, IPI00791830.1, IPI00796216.1, IPI00796333.1                                                                                                                                             | 0.9937 | 4.344 | 3 | 908.98    |
| EFKANAKTSGNSVKIVKVKKE        | Hypothetical protein                                              | IPI00176527.1                                                                                                                                                                                                         | 0.9861 | 4.479 | 2 | 1153.3782 |
| FQERDPSKIKWGDAGAEYV          | Hypothetical protein                                              | IPI00219018.7, IPI00788737.1, IPI00794605.1, IPI00795257.1, IPI00797221.1                                                                                                                                             | 0.7743 | 2.494 | 2 | 796.8969  |
| LMTTVHAITATQKTVDGSPGKLW      | Hypothetical protein                                              | IPI00219018.7, IPI00788737.1, IPI00789134.1, IPI00793922.1, IPI00795257.1, IPI00797221.1                                                                                                                              | 0.9941 | 2.599 | 2 | 1250.4409 |

|                                      |                                         |                                                                                          |        |       |   |           |
|--------------------------------------|-----------------------------------------|------------------------------------------------------------------------------------------|--------|-------|---|-----------|
| MEKAGAHLQGGAKRV                      | Hypothetical protein                    | IPI00219018.7, IPI00788737.1, IPI00789134.1, IPI00794605.1, IPI00795257.1, IPI00797221.1 | 0.9781 | 2.416 | 2 | 1238.9241 |
| MEKAGAHLQGGAKRVIISAPSADAPMF          | Hypothetical protein                    | IPI00219018.7, IPI00788737.1, IPI00789134.1, IPI00794605.1, IPI00795257.1, IPI00797221.1 | 1      | 3.879 | 2 | 1312.5114 |
| MEKAGAHLQGGAKRVIISAPSADAPMFV         | Hypothetical protein                    | IPI00219018.7, IPI00788737.1, IPI00789134.1, IPI00794605.1, IPI00795257.1, IPI00797221.1 | 0.9975 | 2.95  | 2 | 1362.0772 |
| MEKAGAHLQGGAKRVIISAPSADAPMFVM        | Hypothetical protein                    | IPI00219018.7, IPI00788737.1, IPI00789134.1, IPI00794605.1, IPI00795257.1, IPI00797221.1 | 1      | 3.63  | 2 | 876.4664  |
| MGKVKVGVNGFGRI                       | Hypothetical protein                    | IPI00219018.7, IPI00788737.1, IPI00794605.1, IPI00795622.1                               | 1      | 3.409 | 1 | 952.0464  |
| MGVNHEKYDNSLKIISNAS                  | Hypothetical protein                    | IPI00219018.7, IPI00788737.1, IPI00789134.1, IPI00795257.1, IPI00797221.1                | 0.9999 | 3.008 | 2 | 1261.5178 |
| MMARKMKDSEEEIRE                      | Hypothetical protein                    | IPI00075248.11, IPI00386621.1, IPI00794543.1                                             | 0.3674 | 2.269 | 2 | 657.3384  |
| MPYQYPALTPEQKELSDIAHRIVAPGKGILA      | Hypothetical protein                    | IPI00465439.5, IPI00791070.1, IPI00791830.1, IPI00796216.1, IPI00796333.1                | 1      | 4.651 | 3 | 1016.8788 |
| MWISKQEYSESSPSIVHRKC                 | Hypothetical protein                    | IPI00556231.1                                                                            | 0.9998 | 4.019 | 2 | 974.5404  |
| RDGRGALQNIIPASTGAAKAVGKVIPELNGK LTGM | Hypothetical protein                    | IPI00219018.7, IPI00788737.1, IPI00789134.1, IPI00793922.1, IPI00795257.1, IPI00797221.1 | 1      | 5.488 | 3 | 1021.6866 |
| RLEKPAKYDDIKKVVQASEGPLKGILGY         | Hypothetical protein                    | IPI00219018.7, IPI00747273.1, IPI00788737.1, IPI00789134.1, IPI00795257.1                | 0.3609 | 3.056 | 3 | 840.9704  |
| TVHAITATQKTVDGSPGKLWRD               | Hypothetical protein                    | IPI00219018.7, IPI00788737.1, IPI00789134.1, IPI00793922.1, IPI00795257.1, IPI00797221.1 | 1      | 4.358 | 2 | 1136.284  |
| LMAHMASKE                            | Hypothetical protein                    | IPI00219018.7, IPI00789134.1, IPI00794605.1, IPI00795257.1                               | 0.8879 | 1.544 | 1 | 734.8788  |
| VSLWTLTSGTSSVNSPTKCIKTV              | Hypothetical protein DKFZp761C0417      | IPI00470378.1                                                                            | 0.7738 | 3.166 | 2 | 894.5443  |
| GRELNVVPSLGRQ                        | Hypothetical protein DKFZp781J1697      | IPI00470809.3                                                                            | 0.1785 | 2.238 | 2 | 725.8394  |
| SESAAAPAFASSSSEVNPAPKFWH             | hypothetical protein isoform 1          | IPI00788693.1                                                                            | 0.7674 | 2.482 | 2 | 1182.2986 |
| SEPPKLIPLRT                          | hypothetical protein isoform 2          | IPI00807617.1                                                                            | 0.097  | 2.063 | 2 | 1102.1802 |
| FAGGGDLPPAPLSPAGPAAYSPPGP            | hypothetical protein LOC25900 isoform 4 | IPI00022868.3, IPI00449478.4, IPI00787448.2                                              | 0.8273 | 2.753 | 2 | 1195.3047 |

|                              |                                                      |                                                                                                                                                                                                   |        |       |   |           |
|------------------------------|------------------------------------------------------|---------------------------------------------------------------------------------------------------------------------------------------------------------------------------------------------------|--------|-------|---|-----------|
| GVLAQIKSQKVQDILAFYL          | hypothetical protein LOC283971                       | IPI00396078.4, IPI00448073.2, IPI00456692.3                                                                                                                                                       | 0.055  | 1.972 | 2 | 1015.6384 |
| SYELPDGQVITIGNERFR           | Hypothetical protein LOC345651                       | IPI00003269.1, IPI00008603.1, IPI00021428.1, IPI00021439.1, IPI00021440.1, IPI00023006.1, IPI00025416.3, IPI00514530.4, IPI00515047.1, IPI00555900.1, IPI00739539.2, IPI00794523.2, IPI00816229.1 | 0.4845 | 2.922 | 2 | 983.2216  |
| LALYEDGALDSLQLLSSSSLPGLG     | interleukin 1 receptor associated kinase 1 isoform 3 | IPI00060149.2, IPI00293652.1, IPI00385328.2, IPI00472717.1                                                                                                                                        | 0.2371 | 2.126 | 2 | 779.8646  |
| QVFKSFYNETYFERHA             | Intestinal facilitative glucose transporter 7        | IPI00057815.4                                                                                                                                                                                     | 0.1265 | 2.326 | 2 | 768.8499  |
| FYLKMKGDYY                   | Isoform 1 of 14 3 3 protein sigma                    | IPI00013890.2, IPI00018146.1, IPI00021263.3, IPI00216318.5, IPI00216319.3, IPI00220642.7, IPI00411765.3, IPI00743599.1, IPI00759832.1, IPI00789337.1, IPI00790768.1, IPI00794254.2, IPI00796727.1 | 0.9799 | 1.721 | 1 | 1354.4571 |
| KANRIPANLLDQFERQLPL          | Isoform 1 of Disks large associated protein 1        | IPI00021941.1, IPI00792913.1                                                                                                                                                                      | 0.8796 | 2.263 | 2 | 846.5017  |
| AVVTVPAYFNDSQRQATKDAGTIAGLN  | Isoform 1 of Heat shock cognate 71 kDa protein       | IPI00003865.1, IPI00037070.2, IPI00792459.1, IPI00793644.1, IPI00794277.1, IPI00795040.1, IPI00797523.1                                                                                           | 0.7643 | 2.718 | 2 | 1312.4549 |
| LTKMKEIAEAYLGKVTNAV          | Isoform 1 of Heat shock cognate 71 kDa protein       | IPI00003865.1, IPI00037070.2, IPI00792459.1, IPI00793644.1, IPI00794277.1, IPI00795040.1, IPI00797523.1                                                                                           | 1      | 3.678 | 2 | 958.565   |
| FTCRSMNEAIPSGKETSIELDVHH     | Isoform 1 of Kin of IRRE like protein 1 precursor    | IPI00470360.1, IPI00470361.1                                                                                                                                                                      | 0.0522 | 2.151 | 2 | 929.1301  |
| FLRTPKIVSGKDYNVTANSKLV       | Isoform 1 of L lactate dehydrogenase A chain         | IPI00217966.7, IPI00607708.3, IPI00789874.1, IPI00792016.1, IPI00792520.1, IPI00793152.1, IPI00795075.1                                                                                           | 1      | 5.926 | 2 | 1003.1451 |
| KIVSGKDYNVTANSKLV            | Isoform 1 of L lactate dehydrogenase A chain         |                                                                                                                                                                                                   | 0.9997 | 3.339 | 2 | 826.4713  |
| KTLHPDLGTDKDKKEQWKEVHKQVVESA | Isoform 1 of L lactate dehydrogenase A chain         | IPI00217966.7                                                                                                                                                                                     | 0.6092 | 3.437 | 3 | 1007.1097 |

|                                 |                                                                     |                                                                                                                                                                     |        |       |   |           |
|---------------------------------|---------------------------------------------------------------------|---------------------------------------------------------------------------------------------------------------------------------------------------------------------|--------|-------|---|-----------|
| KTLHPDLGTDKDKKEQWKEVHKQVVESAY   | Isoform 1 of L lactate dehydrogenase A chain                        | IPI00217966.7                                                                                                                                                       | 1      | 4.724 | 3 | 1005.157  |
| LFLRTPKIVSGKDYNVTANSKLV         | Isoform 1 of L lactate dehydrogenase A chain                        | IPI00217966.7, IPI00607708.3, IPI00789874.1, IPI00792016.1, IPI00792520.1, IPI00793152.1, IPI00795075.1                                                             | 1      | 6.075 | 2 | 1247.9185 |
| LVKVTLTSEEEARLKKSadTLWGIQKELQF  | Isoform 1 of L lactate dehydrogenase A chain                        | IPI00217966.7, IPI00607708.3                                                                                                                                        | 0.8394 | 3.221 | 3 | 815.3822  |
| AACHRLKLWPELQDNGGDYVSA          | Isoform 1 of Nucleolar protein 6                                    | IPI00152890.1, IPI00157845.3, IPI00291903.4, IPI00556218.1                                                                                                          | 0.1806 | 2.518 | 2 | 1151.781  |
| KSIRDTPAKNAQKS                  | Isoform 1 of Nucleophosmin                                          | IPI00549248.4, IPI00604504.1, IPI00658013.1                                                                                                                         | 0.9874 | 2.951 | 2 | 909.4716  |
| LHPSSLPLTPPSPSLSPHLHGIFQV       | Isoform 1 of PHD finger protein 21B                                 | IPI00738578.1                                                                                                                                                       | 0.1745 | 2.719 | 2 | 1089.227  |
| KSLAQAEAEKQKEEAERE              | Isoform 1 of Plectin 1                                              | IPI00014898.1, IPI00186711.3, IPI00215942.1, IPI00215943.1, IPI00398002.5, IPI00398775.3, IPI00398776.3, IPI00398777.3, IPI00398778.3, IPI00398779.3, IPI00420096.4 | 0.856  | 2.693 | 2 | 919.5511  |
| FSNHKELKTdSSPNQARA              | Isoform 1 of Polypyrimidine tract binding protein 1                 | IPI00179964.5, IPI00183626.8, IPI00334175.3, IPI00556157.1                                                                                                          | 1      | 3.637 | 2 | 1121.7398 |
| WFCPECAAPGVVLAADAGPVS           | Isoform 1 of RING and PHD finger domain containing protein KIAA1542 | IPI00001813.5, IPI00827706.1                                                                                                                                        | 0.23   | 1.88  | 2 | 923.4991  |
| NDALINQKYDEVMATYILLGR           | Isoform 1 of Serine\threonine protein kinase MARK1                  | IPI00185037.9, IPI00292809.6, IPI00555711.1, IPI00796181.1                                                                                                          | 0.8633 | 3.261 | 2 | 963.0695  |
| KDLHPLFDETFEFLVPAEPCRKAGACLLLV  | Isoform 1 of Unc 13 homolog D                                       | IPI00456635.1                                                                                                                                                       | 0.0807 | 2.687 | 3 | 678.2     |
| KSLTPAVPVESKPDKPSGKS            | Isoform 2 of Calpastatin                                            | IPI00220857.3, IPI00220859.3, IPI00305750.4, IPI00413492.3, IPI00465148.2, IPI00760715.1, IPI00760909.2, IPI00761035.1, IPI00761069.1, IPI00761140.1, IPI00761160.1 | 0.1374 | 2.038 | 2 | 945.5262  |
| KGPSSVEDIKAKMQASIEKGGSLPKVEAKF  | Isoform 2 of Nucleophosmin                                          | IPI00220740.1, IPI00549248.4                                                                                                                                        | 1      | 3.88  | 3 | 913.5042  |
| KTPKGPSSVEDIKAKMQASIEKGGSLPKVEA | Isoform 2 of Nucleophosmin                                          | IPI00220740.1, IPI00549248.4                                                                                                                                        | 0.9601 | 2.985 | 3 | 718.866   |
| LIAKSVRNYTQEASLGALQNLV          | Isoform 2 of Plakophilin 2                                          | IPI00005264.1, IPI00219688.1                                                                                                                                        | 0.9992 | 3.482 | 2 | 1097.7191 |
| FFVGGNWKMNNGRKQSLGELI           | Isoform 2 of Triosephosphate isomerase                              | IPI00451401.3, IPI00465028.7, IPI00746832.1, IPI00796633.1, IPI00797687.1                                                                                           | 0.9722 | 2.737 | 2 | 1105.8291 |
| KEYAIKLLAADAGKPPLNQS            | Isoform 7 of Protocadherin 11 X linked precursor                    | IPI00005031.1, IPI00018303.2, IPI00018313.1, IPI00018320.1,                                                                                                         | 0.0879 | 2.671 | 2 | 1124.5933 |

|                            |                                                                     |                                                                                                                                                   |        |       |   |           |
|----------------------------|---------------------------------------------------------------------|---------------------------------------------------------------------------------------------------------------------------------------------------|--------|-------|---|-----------|
|                            |                                                                     | IPI00104649.1, IPI00218387.1,<br>IPI00410049.2, IPI00514303.1,<br>IPI00514457.3, IPI00643227.1,<br>IPI00745536.1, IPI00747762.1                   |        |       |   |           |
| CKAGAVEKGVPLYRHIADLAGNSEV  | Isoform alpha enolase of Alpha enolase                              | IPI00465248.5, IPI00759806.1                                                                                                                      | 0.903  | 2.604 | 2 | 1198.8474 |
| DFKSPDDPSRYISPDQLA         | Isoform alpha enolase of Alpha enolase                              | IPI00465248.5, IPI00759806.1                                                                                                                      | 0.9998 | 3.567 | 2 | 933.5139  |
| DFKSPDDPSRYISPDQLADLY      | Isoform alpha enolase of Alpha enolase                              | IPI00465248.5, IPI00759806.1                                                                                                                      | 0.9999 | 3.549 | 2 | 1083.1761 |
| FIKDYPVVSIEDPFDQDDW        | Isoform alpha enolase of Alpha enolase                              | IPI00465248.5, IPI00759806.1                                                                                                                      | 1      | 4.735 | 2 | 1155.7323 |
| FIKDYPVVSIEDPFDQDDWGAW     | Isoform alpha enolase of Alpha enolase                              | IPI00465248.5, IPI00759806.1                                                                                                                      | 0.9996 | 3.195 | 2 | 1213.8723 |
| KAVEHINKTIAPALVSKK         | Isoform alpha enolase of Alpha enolase                              | IPI00465248.5                                                                                                                                     | 1      | 3.203 | 2 | 1112.914  |
| LDFKSPDDPSRYISPDQLADLY     | Isoform alpha enolase of Alpha enolase                              | IPI00465248.5, IPI00759806.1                                                                                                                      | 0.9999 | 3.528 | 2 | 921.4807  |
| ALPLQREMKMFLKLC            | Isoform Alpha of Tripartite motif containing protein 1              | IPI00009524.3, IPI00216582.3                                                                                                                      | 0.3661 | 1.971 | 2 | 889.1192  |
| DFNPKSSQAKDVSRM            | Isoform Brain of Clathrin light chain A                             | IPI00014587.1, IPI00216393.1,<br>IPI00790571.1                                                                                                    | 0.3319 | 2.281 | 2 | 796.8944  |
| RKQPPVSPGTALVGSQKEPSEVTPKR | Isoform HMG I of High mobility group protein HMG I\HMG Y            | IPI00179700.3, IPI00744851.1,<br>IPI00746310.3                                                                                                    | 0.9221 | 2.65  | 3 | 790.3719  |
| KLPKPPKPVSKMRM             | Isoform Long of HLA class II histocompatibility antigen gamma chain | IPI00022933.2, IPI00217775.1,<br>IPI00607573.1                                                                                                    | 0.9435 | 2.007 | 2 | 844.4419  |
| PKPPKPVSKMRM               | Isoform Long of HLA class II histocompatibility antigen gamma chain | IPI00022933.2, IPI00217775.1,<br>IPI00607573.1                                                                                                    | 0.9558 | 2.277 | 2 | 628.764   |
| VAKANSLEPEPWFFKNLSR        | Isoform Long of Proto oncogene tyrosine protein kinase LCK          | IPI00394952.5, IPI00411413.2,<br>IPI00515097.3, IPI00555672.1                                                                                     | 0.4236 | 2.724 | 2 | 778.3396  |
| ETAKGDYPLEAVRMQHLLI        | Isoform M1 of Pyruvate kinase isozymes M1\M2                        | IPI00220644.8, IPI00479186.5,<br>IPI00604528.2, IPI00783061.1,<br>IPI00784179.1                                                                   | 0.8795 | 2.23  | 2 | 915.5542  |
| FSHGTHEYHAETIKNVRT         | Isoform M1 of Pyruvate kinase isozymes M1\M2                        | IPI00220644.8, IPI00479186.5,<br>IPI00607698.1, IPI00783061.1,<br>IPI00784179.1, IPI00788663.1,<br>IPI00789727.1, IPI00792817.1,<br>IPI00797668.1 | 0.1321 | 1.981 | 2 | 1125.7781 |

|                                      |                                                                                |                                                                                                                                                                                    |        |       |   |           |
|--------------------------------------|--------------------------------------------------------------------------------|------------------------------------------------------------------------------------------------------------------------------------------------------------------------------------|--------|-------|---|-----------|
| WYARQDEQLQKTKANNRAAEEAF              | Isoform Non brain of Clathrin light chain A                                    | IPI00216393.1                                                                                                                                                                      | 0.9964 | 3.74  | 3 | 665.8388  |
| FDKEGNGTVMGAEIRHVLV                  | Isoform Non muscle of Myosin light polypeptide 6                               | IPI00335168.9, IPI00413922.5, IPI00744444.1, IPI00789605.1, IPI00793089.1, IPI00795576.1, IPI00795944.1, IPI00796366.1, IPI00796500.1, IPI00797001.1, IPI00797626.1, IPI00798265.1 | 0.1453 | 2.288 | 2 | 1062.2605 |
| TYRQLLEGEESRM                        | Keratin 77                                                                     | IPI00376379.3                                                                                                                                                                      | 0.8865 | 3.562 | 2 | 990.1155  |
| FLQTSSTFGGGSTRG                      | Keratin, type I cytoskeletal 15                                                | IPI00290077.1                                                                                                                                                                      | 0.9996 | 2.715 | 2 | 1103.2752 |
| REASSGGGGSSSNFHINVEESVDGQVSSH<br>KRE | Keratin, type I cytoskeletal 15                                                | IPI00290077.1, IPI00797326.1                                                                                                                                                       | 1      | 3.716 | 3 | 878.5006  |
| RGGSLLAGGGGFGGGSLSGGGGSRS            | Keratin, type I cytoskeletal 15                                                | IPI00290077.1                                                                                                                                                                      | 1      | 3.464 | 2 | 1039.6066 |
| RATGGGLSSVGGGSSTIKYTTTSSSRK          | Keratin, type II cytoskeletal 6B                                               | IPI00293665.7                                                                                                                                                                      | 1      | 4.827 | 2 | 883.9854  |
| RDGKLVSESSDVLPK                      | Keratin, type II cytoskeletal 8                                                | IPI00554648.3                                                                                                                                                                      | 0.9998 | 3.546 | 2 | 1073.5704 |
| TYRKLEGEESRLESGMQNMS                 | Keratin, type II cytoskeletal 8                                                | IPI00554648.3                                                                                                                                                                      | 0.123  | 2.691 | 2 | 690.7479  |
| DVLEDKCLKGEMMDLQHGS LF               | L lactate dehydrogenase B chain                                                | IPI00219217.3, IPI00788938.1, IPI00789173.1, IPI00789771.1, IPI00797561.1                                                                                                          | 0.059  | 2.318 | 2 | 1022.6948 |
| LVDVLEDKCLKGEMMDLQHGS LF             | L lactate dehydrogenase B chain                                                | IPI00219217.3, IPI00788938.1, IPI00789173.1, IPI00789771.1, IPI00797561.1                                                                                                          | 0.912  | 3.668 | 2 | 1203.3919 |
| LVDVLEDKCLKGEMMDLQHGS LFL            | L lactate dehydrogenase B chain                                                | IPI00219217.3, IPI00788938.1, IPI00789173.1, IPI00789771.1, IPI00797561.1                                                                                                          | 0.8791 | 3.556 | 2 | 1068.2208 |
| ATADILRGLLSNVLCRLCSKY                | Leukemia inhibitory factor precursor                                           | IPI00009720.1                                                                                                                                                                      | 0.071  | 2.964 | 3 | 692.8439  |
| LVWVPSDKSGFEPASLKEEV                 | Myosin 9                                                                       | IPI00019502.3, IPI00556012.1                                                                                                                                                       | 0.0849 | 2.071 | 2 | 1342.9636 |
| NYGFSGVMLRGSGIQWDLRKTQPY             | NADH dehydrogenase [ubiquinone] iron sulfur protein 2, mitochondrial precursor | IPI00025239.2                                                                                                                                                                      | 0.6721 | 2.7   | 2 | 584.7442  |
| RRMRLTHCGLQEKHL                      | NLRC5 protein, IFN-specific response element                                   | IPI00329085.2, IPI00335249.1, IPI00383061.3, IPI00641739.1, IPI00789837.1                                                                                                          | 0.314  | 2.027 | 2 | 1428.5324 |
| FIAIKPDGVQRGLVGEIIRFE                | Nucleoside diphosphate kinase A                                                | IPI00012048.1, IPI00026260.1, IPI00375531.2, IPI00604590.3, IPI00789423.1, IPI00790982.1, IPI00794728.1, IPI00795292.1, IPI00796344.1, IPI00797082.1, IPI00798187.1                | 0.9795 | 2.807 | 2 | 721.8499  |
| LFADKVPKTAENFR                       | Peptidyl prolyl cis trans isomerase A                                          | IPI00419585.9, IPI00743250.1                                                                                                                                                       | 0.9993 | 3.008 | 2 | 1055.2115 |

|                               |                                                                     |                                                                                          |        |       |   |           |
|-------------------------------|---------------------------------------------------------------------|------------------------------------------------------------------------------------------|--------|-------|---|-----------|
| MLFFLIMNFLEGKDASAFKMRG        | Peroxisomal membrane protein 2                                      | IPI00221002.5, IPI00787173.1, IPI00796440.1                                              | 0.1328 | 2.623 | 2 | 804.5083  |
| EEEGKGDASGNKVKAEPKIEAF        | Phosphoglycerate kinase 1                                           | IPI00169383.3                                                                            | 0.9299 | 2.634 | 2 | 1129.2471 |
| EDVIINGHSHEDDNPFAEY           | Polyadenylate binding protein interacting protein 2                 | IPI00304483.1                                                                            | 0.9417 | 3.111 | 2 | 955.4772  |
| YIDENQDRYIKKLAKWV             | PP856                                                               | IPI00165579.6, IPI00177728.3, IPI00642656.2, IPI00642792.1, IPI00643827.1, IPI00646632.2 | 0.7593 | 2.773 | 2 | 660.2693  |
| LRTKSTGGAPTFNVT/TKDKTLV       | Profilin 1                                                          | IPI00216691.5                                                                            | 1      | 4.993 | 2 | 1147.3089 |
| LEKIVNPKGEEKPSM               | Proteasome activator complex subunit 2                              | IPI00384051.5, IPI00398048.1, IPI00746205.1                                              | 0.9545 | 2.688 | 2 | 868.4634  |
| FAGDKGYLTKEDLR                | Protein S100 A10                                                    | IPI00183695.9                                                                            | 0.999  | 3.209 | 2 | 1009.6112 |
| MFTFHKFAGDKGYLTKEDLR          | Protein S100 A10                                                    | IPI00183695.9                                                                            | 1      | 4.13  | 2 | 609.7204  |
| TFHKFAGDKGYLTKEDLR            | Protein S100 A10                                                    | IPI00183695.9                                                                            | 1      | 3.54  | 2 | 691.7998  |
| YFVVHMKQKGGK                  | Protein S100 A10                                                    | IPI00183695.9                                                                            | 1      | 3.623 | 2 | 961.0981  |
| RMMKKLDTNSDQQLDF              | Protein S100 A11                                                    | IPI00013895.1                                                                            | 0.9497 | 4.147 | 2 | 929.1333  |
| VFQKYAGKDGYNLTL               | Protein S100 A11                                                    | IPI00013895.1                                                                            | 0.9958 | 3.107 | 2 | 834.9187  |
| VFQKYAGKDGYNLTL               | Protein S100 A11                                                    | IPI00013895.1                                                                            | 0.9193 | 2.367 | 2 | 1163.3376 |
| LIGGITGPIAKLIHEQEQQSSS        | Protein S100 A16                                                    | IPI00062120.1                                                                            | 0.9999 | 2.852 | 2 | 1009.6343 |
| DEEGLKLMGSLDENSQQVDF          | Protein S100 A2                                                     | IPI00019869.3, IPI00514806.1                                                             | 0.8798 | 2.874 | 2 | 1118.7037 |
| FVGEKVDEEGLKLM                | Protein S100 A2                                                     | IPI00019869.3                                                                            | 0.1673 | 2.506 | 2 | 955.3682  |
| FVGEKVDEEGLKLMGSLDENSQQVDF    | Protein S100 A2                                                     | IPI00019869.3                                                                            | 0.9996 | 3.078 | 2 | 801.4211  |
| GEKVDEEGLKLMGSLDENSQQVDF      | Protein S100 A2                                                     | IPI00019869.3, IPI00514806.1                                                             | 1      | 3.267 | 2 | 1037.1631 |
| DLDRNKDQEVNFQ                 | Protein S100 A6                                                     | IPI00027463.1                                                                            | 0.9732 | 2.492 | 2 | 689.74    |
| DLDRNKDQEVNFQEY               | Protein S100 A6                                                     | IPI00027463.1                                                                            | 0.5374 | 2.611 | 2 | 818.3621  |
| ELTIGSKLQDAE                  | Protein S100 A6                                                     | IPI00027463.1                                                                            | 0.9695 | 1.665 | 1 | 1046.1997 |
| IFHKYSGREGDKHTLSKKE           | Protein S100 A6                                                     | IPI00027463.1                                                                            | 0.8657 | 3.411 | 3 | 877.9952  |
| IFHKYSGREGDKHTLSKKEKELI       | Protein S100 A6                                                     | IPI00027463.1                                                                            | 0.9655 | 3.814 | 3 | 931.0064  |
| LIQKELTIGSKLQDAE              | Protein S100 A6                                                     | IPI00027463.1                                                                            | 1      | 4.369 | 2 | 726.8103  |
| LVAIFHKYSGREGDKHTLSKKE        | Protein S100 A6                                                     | IPI00027463.1                                                                            | 1      | 4.777 | 3 | 972.4512  |
| LVAIFHKYSGREGDKHTLSKKEKELI    | Protein S100 A6                                                     | IPI00027463.1                                                                            | 1      | 4.489 | 3 | 1129.8045 |
| REGDKHTLSKKEKELI              | Protein S100 A6                                                     | IPI00027463.1                                                                            | 0.9437 | 2.632 | 2 | 911.9623  |
| KAVVSTSDKKMPNGILEEQQRSRIPAHWR | Protein tyrosine phosphatase epsilon cytoplasmic isoform (Fragment) | IPI00816740.1                                                                            | 0.9748 | 3.444 | 3 | 1083.2634 |
| AFTKNQKDPGVLDRM               | Putative S100 calcium binding protein H_NH0456N16.1                 | IPI00003734.1, IPI00013895.1, IPI00787797.1                                              | 0.9998 | 3.35  | 2 | 759.8534  |
| FTKNQKDPGVLDRM                | Putative S100 calcium binding protein H_NH0456N16.1                 | IPI00003734.1, IPI00013895.1, IPI00787797.1                                              | 0.9986 | 3.473 | 2 | 1095.2117 |



|                                       |                                                                                                                                 |                                                                                          |        |       |   |           |
|---------------------------------------|---------------------------------------------------------------------------------------------------------------------------------|------------------------------------------------------------------------------------------|--------|-------|---|-----------|
| PPCVGGVPG                             | similar to agrin                                                                                                                | IPI00786877.1                                                                            | 0.3969 | 1.488 | 1 | 755.3832  |
| FDAERDALNIETAIKTKGVDEVTI              | Similar to annexin A2 isoform 1                                                                                                 | IPI00334627.3, IPI00418169.3, IPI00455315.4, IPI00797556.1                               | 1      | 3.943 | 2 | 914.0315  |
| LESIRKEVKGDLENAFL                     | Similar to annexin A2 isoform 1                                                                                                 | IPI00334627.3, IPI00418169.3, IPI00455315.4                                              | 0.3014 | 2.433 | 2 | 684.2693  |
| LKASMKGLGTDEDSLII                     | Similar to annexin A2 isoform 1                                                                                                 | IPI00334627.3, IPI00418169.3, IPI00455315.4, IPI00797556.1                               | 0.9962 | 2.901 | 2 | 649.225   |
| LLKTPAQYDASELKASMKGLGTDEDSLII         | Similar to annexin A2 isoform 1                                                                                                 | IPI00334627.3, IPI00418169.3, IPI00455315.4, IPI00797556.1                               | 1      | 3.479 | 2 | 791.403   |
| LSLEGDHSTPPSAYGSVKA                   | Similar to annexin A2 isoform 1                                                                                                 | IPI00334627.3, IPI00418169.3, IPI00455315.4, IPI00797556.1, IPI00798111.1                | 1      | 3.64  | 2 | 985.1496  |
| LYDSMKGKGTRDKVLI                      | Similar to annexin A2 isoform 1                                                                                                 | IPI00334627.3, IPI00418169.3, IPI00455315.4                                              | 0.9984 | 2.732 | 2 | 908.9577  |
| MYKTDLEKDIISDTSGDFR                   | Similar to annexin A2 isoform 1                                                                                                 | IPI00334627.3, IPI00418169.3, IPI00455315.4, IPI00797556.1                               | 1      | 3.991 | 2 | 1086.2532 |
| RSVPHLQKVFDRYKSYSPYDMLE               | Similar to annexin A2 isoform 1                                                                                                 | IPI00334627.3, IPI00418169.3, IPI00455315.4                                              | 1      | 3.526 | 2 | 806.4246  |
| YIQQDTKGDYQKALL                       | Similar to annexin A2 isoform 1                                                                                                 | IPI00334627.3, IPI00418169.3, IPI00455315.4, IPI00795925.1                               | 0.6452 | 2.463 | 2 | 1091.2464 |
| YYYIQQDTKGDYQKALL                     | Similar to annexin A2 isoform 1                                                                                                 | IPI00334627.3, IPI00418169.3, IPI00455315.4, IPI00795925.1                               | 0.9997 | 2.946 | 2 |           |
| HMMKKLDLTSDGQLDF                      | Similar to Calgizzarin                                                                                                          | IPI00743214.1                                                                            | 0.7823 | 3.488 | 2 | 797.2376  |
| DAEQRGELAIKDANAKLSELE                 | similar to Keratin, type II cytoskeletal 8                                                                                      | IPI00215804.4, IPI00554648.3, IPI00787216.1, IPI00787323.1, IPI00787392.1, IPI00793917.1 | 0.9979 | 2.835 | 2 | 1029.1508 |
| KGKADAGKEGNNPAENGDQAKTQQAQKAE GAGDAK  | similar to Nonhistone chromosomal protein HMG 17 (High mobility group nucleosome binding domain containing protein 2) isoform 3 | IPI00181126.3, IPI00217950.5, IPI00478470.1, IPI00787782.1                               | 1      | 5.207 | 3 | 962.7764  |
| KKGKADAGKEGNNPAENGDQAKTQQAQKA EGAGDAK | similar to Nonhistone chromosomal protein HMG 17 (High mobility group nucleosome binding domain containing protein 2) isoform 3 | IPI00181126.3, IPI00217950.5, IPI00478470.1, IPI00787782.1                               | 1      | 4.714 | 3 | 1101.149  |
| FILKHTGPGILSMANAGPNTNGSQFF            | similar to peptidylprolyl isomerase A isoform 1                                                                                 | IPI00248321.8, IPI00374732.4, IPI00419585.9, IPI00472718.3, IPI00745933.1                | 1      | 4.897 | 2 | 1199.8713 |
| QSNPSPQLRSVMKVESSENVSPKH              | Similar to Zinc finger CCCH type domain containing protein 11A isoform 1                                                        | IPI00455725.3                                                                            | 0.1683 | 2.604 | 2 | 664.419   |

|                              |                  |                                                                                                                                       |        |       |   |           |
|------------------------------|------------------|---------------------------------------------------------------------------------------------------------------------------------------|--------|-------|---|-----------|
| RLREKDKHIEEVRKN              | Stathmin         | IPI00479997.4                                                                                                                         | 0.0531 | 1.945 | 2 | 798.9082  |
| ETQEKNLPTKETIEQEKRS          | Thymosin beta 10 | IPI00220827.5                                                                                                                         | 1      | 4.295 | 2 | 988.6732  |
| KLKKTETQEKNLPTKETIEQEKRS     | Thymosin beta 10 | IPI00220827.5                                                                                                                         | 1      | 4.896 | 2 | 689.8811  |
| KNTLPTKETIEQEKRS             | Thymosin beta 10 | IPI00220827.5                                                                                                                         | 0.5831 | 2.509 | 2 | 1325.966  |
| KTETQEKNLPTKETIEQEKRS        | Thymosin beta 10 | IPI00220827.5                                                                                                                         | 1      | 4.621 | 2 | 983.417   |
| NLPTKETIEQEKRS               | Thymosin beta 10 | IPI00220827.5                                                                                                                         | 0.9993 | 3.069 | 2 | 954.0293  |
| ETQEKNPLPSAGES               | thymosin like 3  | IPI00180240.2, IPI00220828.9, IPI00719405.2, IPI00815642.1, IPI00815829.1, IPI00815835.1, IPI00816008.1, IPI00816288.1, IPI00816464.1 | 1      | 3.648 | 2 | 1000.6018 |
| ETQEKNPLPSKETIEQEQKQ         | thymosin like 3  | IPI00180240.2, IPI00220828.9, IPI00719405.2, IPI00815642.1, IPI00815829.1, IPI00815835.1, IPI00816008.1, IPI00816288.1, IPI00816464.1 | 0.9999 | 3.683 | 2 | 1128.7316 |
| ETQEKNPLPSKETIEQEQQAGE       | thymosin like 3  | IPI00180240.2, IPI00220828.9, IPI00719405.2, IPI00815642.1, IPI00815829.1, IPI00815835.1, IPI00816008.1, IPI00816288.1, IPI00816464.1 | 0.8594 | 2.815 | 2 | 1087.7026 |
| KLKKTETQEKNPLPSKETIEQEQQAGE  | thymosin like 3  | IPI00180240.2, IPI00220828.9, IPI00719405.2, IPI00815642.1, IPI00815829.1, IPI00815835.1, IPI00816008.1, IPI00816288.1, IPI00816464.1 | 0.9954 | 4.047 | 3 | 1024.7952 |
| KLKKTETQEKNPLPSKETIEQEQQAGES | thymosin like 3  | IPI00180240.2, IPI00220828.9, IPI00719405.2, IPI00815642.1, IPI00815829.1, IPI00815835.1, IPI00816008.1, IPI00816288.1, IPI00816464.1 | 1      | 4.548 | 3 | 925.3785  |
| KTETQEKNPLPSKETIEQEQQAGES    | thymosin like 3  | IPI00180240.2, IPI00220828.9, IPI00719405.2, IPI00815642.1, IPI00815829.1, IPI00815835.1, IPI00816008.1, IPI00816288.1, IPI00816464.1 | 1      | 4.243 | 2 | 1202.8121 |
| FRSVPTSTVFYPSDGVATEKAV       | Transketolase    | IPI00643920.2, IPI00788802.1, IPI00789310.1, IPI00792641.1, IPI00793119.1                                                             | 0.1398 | 2.059 | 2 | 940.5105  |
| MFRSVPTSTVFYPSDGVATEKAV      | Transketolase    | IPI00643920.2, IPI00788802.1,                                                                                                         | 0.4578 | 2.391 | 2 | 1059.6917 |

|                             |                                    |                                                                                                                                                                                                                                         |        |       |   |           |
|-----------------------------|------------------------------------|-----------------------------------------------------------------------------------------------------------------------------------------------------------------------------------------------------------------------------------------|--------|-------|---|-----------|
|                             |                                    | IPI00789310.1, IPI00792641.1,<br>IPI00793119.1                                                                                                                                                                                          |        |       |   |           |
| ELEEALANASDAELCDIAAILGMHTLM | Tropomodulin 1                     | IPI00002375.3                                                                                                                                                                                                                           | 0.6135 | 3.138 | 2 | 1293.4718 |
| LFKRISQFT                   | Tubulin beta 2C chain              | IPI00007752.1, IPI00011654.2,<br>IPI00013475.1, IPI00013683.2,<br>IPI00023598.2, IPI00031370.3,<br>IPI00152453.1, IPI00640115.1,<br>IPI00641706.1, IPI00643158.1,<br>IPI00644620.1, IPI00645452.1,<br>IPI00646779.2, IPI00647682.2, IPI | 0.3959 | 1.703 | 1 | 1176.8626 |
| LPVISAENWKPATKTDQVIQSLI     | Ubiquitin conjugating enzyme E2 L3 | IPI00021347.1, IPI00176873.2,<br>IPI00472476.1                                                                                                                                                                                          | 0.996  | 2.736 | 2 | 563.1154  |
| QVINETSQHDDLE               | Vimentin                           | IPI00418471.6                                                                                                                                                                                                                           | 0.8855 | 2.837 | 2 | 1121.2699 |
| YKCSDCGKAFTTKSGLNVHQRK      | Zinc finger protein 615            | IPI00418568.3, IPI00644529.1,<br>IPI00748237.1, IPI00798052.1                                                                                                                                                                           | 0.0724 | 2.597 | 2 | 1233.4957 |
