# Supplementary material
Source: PubMed Central journal article supplement (PMC3494186)
Supplement: supp_M112.019232_Supplemental_Table_2__09-10-12.pdf [file supp_M112.019232_Supplemental_Table_2__09-10-12.pdf]

**Supplemental Table 2.** Peptides identified from MCF10/CiITA/CD80 and MCF10/CiITA/CD80/siRNA as a result of two individual affinity purification and four LC-MS/MS runs. Peptides unique to MCF10/CiITA/CD80 are in blue, peptides unique to MCF10/CiITA/CD80/siRNA are in red and peptides present in both cell lines are in black. Probability of peptide identification is from Peptide Prophet analysis, Xcorr, charge and mass/charge ratio are from SEQUEST database search results. False discovery rate for this dataset was derived from Peptide Prophet analysis and is equal to 39%.

| Peptide sequence            | Protein                                             | IPI accession number                                                                                                                                                                                                                           | Probability | Xcorr | Charge | Mass/charge ratio |
|-----------------------------|-----------------------------------------------------|------------------------------------------------------------------------------------------------------------------------------------------------------------------------------------------------------------------------------------------------|-------------|-------|--------|-------------------|
| AFGNAKTVKNDSSRFGKFI         | Myosin 9                                            | IPI00019502.3, IPI00020501.1, IPI00024870.1, IPI00029818.4, IPI00337335.5, IPI00395772.4, IPI00397526.2, IPI00479307.3, IPI00607760.1, IPI00607778.1, IPI00607818.1, IPI00743857.1, IPI00744256.1, IPI00746736.1, IPI00790503.2, IPI00791256.1 | 1           | 4.914 | 3      | 1009.6144         |
| AIINSGPREDSTRI              | 40S ribosomal protein S5                            | IPI00008433.4, IPI00479705.2                                                                                                                                                                                                                   | 0.1015      | 2.15  | 2      | 673.2257          |
| AMRIMGIPEEEQMGLL            | Myosin 9                                            | IPI00019502.3, IPI00395772.4                                                                                                                                                                                                                   | 1           | 2.968 | 2      | 817.9872          |
| AVAKADKLAEEHSS              | ATP synthase subunit beta, mitochondrial precursor  | IPI00303476.1, IPI00792128.1, IPI00792534.1, IPI00793851.1                                                                                                                                                                                     | 1           | 2.974 | 2      | 693.2562          |
| DFTRGILTP                   | Myosin 9                                            | IPI00019502.3, IPI00395772.4                                                                                                                                                                                                                   | 0.1093      | 1.961 | 1      | 807.9604          |
| DGKVVSETNDTKVLRH            | 49 kDa protein                                      | IPI00554788.4, IPI00737922.1, IPI00784347.2, IPI00795353.1                                                                                                                                                                                     | 1           | 3.924 | 2      | 842.4491          |
| DVMRALGQNPTNAEVLK           | Myosin light polypeptide 6B                         | IPI00027255.1, IPI00335168.9, IPI00744444.1, IPI00789605.1, IPI00796366.1, IPI00797001.1, IPI00798146.1                                                                                                                                        | 0.9999      | 3.935 | 2      | 807.4357          |
| EDVIINGHSHEDDNPFAEY         | Polyadenylate binding protein interacting protein 2 | IPI00304483.1                                                                                                                                                                                                                                  | 0.9597      | 2.46  | 2      | 955.4772          |
| EFKANAECTSGSNV KIVKVKKE     | ATP synthase epsilon chain, mitochondrial           | IPI00215878.6                                                                                                                                                                                                                                  | 0.9998      | 6.242 | 2      | 1153.849          |
| EFKANAKTSGNSV KIVKVKKE      | Hypothetical protein                                | IPI00176527.1                                                                                                                                                                                                                                  | 0.9357      | 4.956 | 3      | 1153.3782         |
| EFTRILKHGAKDKDD             | myosin regulatory light chain 9 isoform b           | IPI00030929.4, IPI00033494.3, IPI00220278.5, IPI00220573.4, IPI00604523.1, IPI00719669.2                                                                                                                                                       | 0.5474      | 2.763 | 2      | 822.4468          |
| ELEEALANASDAELCDIAAILGMHTLM | Tropomodulin 1                                      | IPI00002375.3                                                                                                                                                                                                                                  | 0.851       | 3.083 | 2      | 1293.4718         |

|                               |                                                   |                                                                                                                                                                                                   |        |       |   |           |
|-------------------------------|---------------------------------------------------|---------------------------------------------------------------------------------------------------------------------------------------------------------------------------------------------------|--------|-------|---|-----------|
| ELRVAPEEHPVLL                 | Actin, cytoplasmic 1                              | IPI00021439.1, IPI00021440.1, IPI00555733.1, IPI00556391.1, IPI00655798.3, IPI00739539.2, IPI00790339.1, IPI00796881.1                                                                            | 0.8469 | 2.284 | 2 | 630.7372  |
| EMYKGGKRHEMPPHIYA             | Myosin 9                                          | IPI00019502.3, IPI00020501.1, IPI00024870.1, IPI00395772.4, IPI00556012.1, IPI00743857.1, IPI00744256.1                                                                                           | 1      | 3.459 | 2 | 958.6564  |
| EPKTTDSFLEIELAHLANGTLNPHYCVLW | Brain specific angiogenesis inhibitor 3 precursor | IPI00028448.1                                                                                                                                                                                     | 0.1323 | 2.362 | 3 | 954.4256  |
| ETQEKNPSPKETIEQEKQAGES        | Thymosin like 3                                   | IPI00180240.2, IPI00220828.9, IPI00719405.2, IPI00815642.1, IPI00815829.1, IPI00815835.1, IPI00816008.1, IPI00816288.1, IPI00816464.1                                                             | 0.9999 | 3.543 | 2 | 1236.8277 |
| FAQIHEMQDLGDKLRMI             | Lon protease homolog, mitochondrial precursor     | IPI00005158.1, IPI00334291.7                                                                                                                                                                      | 0.7983 | 5.182 | 2 | 893.5388  |
| FDKEGNGTVMGAEIRHVLV           | Isoform Non muscle of Myosin light polypeptide 6  | IPI00335168.9, IPI00413922.5, IPI00744444.1, IPI00789605.1, IPI00793089.1, IPI00795576.1, IPI00795944.1, IPI00796366.1, IPI00796500.1, IPI00797001.1, IPI00797626.1, IPI00798265.1                | 0.9894 | 4.944 | 2 | 914.0315  |
| FFKNWRDPDQTDGLGLSYLS          | Isoform 1 of Gelsolin precursor                   | IPI00026314.1, IPI00513782.3, IPI00646773.2                                                                                                                                                       | 0.2134 | 2.918 | 2 | 1063.6604 |
| FFSETGAGKHVPRAVAV             | TUBA6 protein                                     | IPI00166768.2, IPI00179709.4, IPI00180675.4, IPI00218343.4, IPI00218345.4, IPI00387144.4, IPI00410402.2, IPI00478908.3, IPI00552356.1, IPI00743604.1, IPI00792677.1, IPI00793930.1, IPI00795002.1 | 0.997  | 2.287 | 2 | 802.4067  |
| FIKDYPVVSIEDPFDQDDW           | Isoform alpha enolase of Alpha enolase            | PI:IPI00465248.5, IPI00759806.1                                                                                                                                                                   | 0.9225 | 3.852 | 2 | 998.5619  |
| FINNPLAQADWAAKKLV             | Myosin 9                                          | IPI00019502.3, IPI00556012.1                                                                                                                                                                      | 1      | 3.731 | 2 | 827.4569  |
| FITKMDYPKQTQVSVLPEGGETPLFKQFF | Gelsolin precursor                                | IPI00026314.1, IPI00513782.3, IPI00646773.2                                                                                                                                                       | 0.962  | 5.346 | 3 | 1028.5205 |
| FKFEDPKFEVIEKPQA              | Hypothetical protein                              | IPI00002521.1, IPI00456008.1                                                                                                                                                                      | 0.9999 | 2.924 | 2 | 903.5293  |

|                                   |                                                                     |                                                                                                         |        |       |   |           |
|-----------------------------------|---------------------------------------------------------------------|---------------------------------------------------------------------------------------------------------|--------|-------|---|-----------|
| FKKERNTDQASMPDNTAAQKVSHLLGINV     | Myosin 9                                                            | IPI00019502.3, IPI00395772.4                                                                            | 1      | 3.998 | 3 | 990.1035  |
| FLRTPKIVSGKDYNVTANSKLV            | Isoform 1 of L lactate dehydrogenase A chain                        | IPI00217966.7, IPI00607708.3, IPI00789874.1, IPI00792016.1, IPI00792520.1, IPI00793152.1, IPI00795075.1 | 1      | 5.234 | 3 | 1103.2752 |
| FMVIEGKAAQRHETLT                  | E2 induced gene 5 protein                                           | IPI00023001.2                                                                                           | 0.36   | 2.594 | 2 | 856.5091  |
| FNMIDQNRDGFINKEDLHDMLV            | similar to myosin regulatory light chain like                       | IPI00455715.2, IPI00740621.1                                                                            | 0.9777 | 3.608 | 2 | 1210.3438 |
| FNQVEIKPEMIGHYLGEFS               | 40S ribosomal protein S15                                           | IPI00216153.7, IPI00479058.1                                                                            | 0.9924 | 3.895 | 2 | 1003.1451 |
| FNVINGGSHAGNKLAMQEFM              | Alpha enolase, lung specific                                        | IPI00013769.1, IPI00216171.3, IPI00218474.5, IPI00465248.5, IPI00759806.1, IPI00792715.1                | 1      | 5.584 | 2 | 944.5525  |
| FRTRPSLLSAPINSVLLFLMGM            | PQ loop repeat containing 2 isoform 1                               | IPI00643251.2, IPI00748068.1, IPI00827572.1                                                             | 0.0892 | 2.196 | 2 | 1093.8285 |
| FSITYKPVKHGRPGIGATHSSRF           | 40S ribosomal protein S15                                           | IPI00216153.7, IPI00479058.1                                                                            | 1      | 2.822 | 2 | 1125.1167 |
| FTGHMGKLVPLKETIKGFQ               | ATP synthase subunit beta, mitochondrial precursor                  | IPI00303476.1, IPI00789157.1, IPI00790385.1, IPI00792128.1, IPI00792534.1                               | 0.9999 | 4.347 | 2 | 929.1301  |
| FTKSPYQEFTDHLVKTHTRV              | 40S ribosomal protein S2                                            | IPI00013485.3, IPI00478002.1, IPI00479366.1, IPI00744451.3, IPI00827598.1                               | 0.3874 | 4.729 | 2 | 1095.2117 |
| FTRILKHGAKDKDD                    | Myosin regulatory light chain 9 isoform b                           | IPI00030929.4, IPI00033494.3, IPI00220278.5, IPI00220573.4, IPI00604523.1, IPI00719669.2                | 1      | 3.318 | 2 | 749.3445  |
| GIVTNWDDMEKIWHHTFY                | Actin, cytoplasmic 1                                                | IPI00021439.1, IPI00021440.1, IPI00790339.1, IPI00796881.1                                              | 1      | 3.031 | 2 | 1037.1631 |
| GKFYLVIEELSQLFRSLVPIQL            | RING finger and transmembrane domain-containing protein 2 isoform 2 | IPI00797961, IPI00877637, IPI00878447,                                                                  | 0.0965 | 2.62  | 3 | 808.6307  |
| GNIVFKKERNTDQASMPDNTAAQKVSHLLGINV | Myosin 9                                                            | IPI00019502.3, IPI00395772.4                                                                            | 1      | 5.98  | 3 | 1147.9594 |
| GWKVTRKDGNASGTTLL                 | EEF1A1 protein                                                      | IPI00025447.7, IPI00396485.3, IPI00472724.1, IPI00793363.1                                              | 0.9275 | 3.413 | 2 | 817.9129  |
| ILSHFEKLEPQAAVVKALGEL             | Interleukin 20 precursor                                            | IPI00000048.2                                                                                           | 0.1929 | 2.534 | 2 | 1034.1906 |
| KENLDPSNLMPPPNQT                  | Cytochrome c type heme                                              | IPI00023406.1                                                                                           | 0.3216 | 2.42  | 2 | 783.8626  |

|                             |                                                                |                                                                                                                                                                                    |        |       |   |           |
|-----------------------------|----------------------------------------------------------------|------------------------------------------------------------------------------------------------------------------------------------------------------------------------------------|--------|-------|---|-----------|
|                             | lyase                                                          |                                                                                                                                                                                    |        |       |   |           |
| KEYAIKLLAADAGKPPLNQS        | Protocadherin 11 X linked precursor                            | IPI00005031.1, IPI00018303.2, IPI00018313.1, IPI00018320.1, IPI00104649.1, IPI00218387.1, IPI00410049.2, IPI00514303.1, IPI00514457.3, IPI00643227.1, IPI00745536.1, IPI00747762.1 | 0.8641 | 3.188 | 2 | 957.107   |
| KHAVSEGTKAVTQYTSSKI         | 7 kDa protein                                                  | IPI00746213.1                                                                                                                                                                      | 0.8577 | 5.046 | 2 | 897.9756  |
| KIKGDVPSVGLGPDVDLQGPEAKI    | Neuroblast differentiation associated protein AHNAK (Fragment) | IPI00021812.1, IPI00555610.3                                                                                                                                                       | 1      | 3.326 | 2 | 1161.2884 |
| KIVKPNGEKPDEFESGISQALL      | 40S ribosomal protein S7                                       | IPI00013415.1, IPI00478287.2                                                                                                                                                       | 0.9996 | 4.304 | 2 | 1079.555  |
| KIVSGKDYNVTANSKLV           | Isoform 1 of L lactate dehydrogenase A chain                   | IPI00217966.7, IPI00607708.3, IPI00789874.1, IPI00792016.1, IPI00792520.1, IPI00793152.1, IPI00795075.1                                                                            | 1      | 4.144 | 2 | 805.4065  |
| KLKKTETQEKNPLPSKETIEQEQAGES | Thymosin like 3                                                | IPI00180240.2, IPI00220828.9, IPI00719405.2, IPI00815642.1, IPI00815829.1, IPI00815835.1, IPI00816008.1, IPI00816288.1, IPI00816464.1                                              | 1      | 5.184 | 3 | 1024.7952 |
| KLKKTETQEKNLPTKETIEQEKRS    | Thymosin beta 10                                               | IPI00220827.5                                                                                                                                                                      | 1      | 6.961 | 3 | 925.3785  |
| KSIRDTPAKNAQKS              | Isoform 1 of Nucleophosmin                                     | IPI00549248.4, IPI00604504.1, IPI00658013.1                                                                                                                                        | 0.1068 | 2.832 | 2 | 665.2476  |
| KTETQEKNLPTKETIEQEKRS       | Thymosin beta 10                                               | IPI00220827.5                                                                                                                                                                      | 1      | 4.539 | 2 | 1202.8121 |
| KTPKGPSSVEDIKAKM            | Nucleophosmin                                                  | IPI00220740.1, IPI00549248.4, IPI00658013.1                                                                                                                                        | 0.9869 | 2.984 | 2 | 729.3308  |
| KVAPAPAVVKKQEAKK            | 60S ribosomal protein L7a                                      | IPI00299573.12, IPI00397676.4, IPI00478896.2, IPI00479315.2                                                                                                                        | 1      | 3.838 | 2 | 718.866   |
| KVKSLNDITAKERFSPLTTNLI      | ATP synthase O subunit, mitochondrial precursor                | IPI00007611.1, IPI00789135.1                                                                                                                                                       | 0.2048 | 4.692 | 2 | 1124.7861 |
| KVVSETNDTKVLRH              | 49 kDa protein                                                 | IPI00554788.4, IPI00737922.1, IPI00784347.2, IPI00795353.1                                                                                                                         | 0.9991 | 3.112 | 2 | 749.8369  |
| LAYVASSHKSKKDQGELERQ        | Myosin 9                                                       | IPI00019502.3, IPI00395772.4                                                                                                                                                       | 1      | 3.947 | 2 | 1017.6132 |
| LAYVASSHKSKKDQGERLLQ        | Myosin 9                                                       | IPI00019502.3, IPI00395772.4                                                                                                                                                       | 0.9997 | 3.101 | 3 | 796.8933  |
| LAYVASSHKSKKDQGERLLQANP     | Myosin 9                                                       | IPI00019502.3, IPI00395772.4                                                                                                                                                       | 1      | 4.614 | 3 | 901.3304  |
| LDFKSPDDPSRYISPDQLADLY      | Isoform alpha enolase of                                       | IPI00465248.5, IPI00759806.1                                                                                                                                                       | 0.1275 | 2.749 | 2 | 1140.72   |

|                                 |                                                     |                                                                                                                                                                                                                                                                              |        |       |   |           |
|---------------------------------|-----------------------------------------------------|------------------------------------------------------------------------------------------------------------------------------------------------------------------------------------------------------------------------------------------------------------------------------|--------|-------|---|-----------|
|                                 | Alpha enolase                                       |                                                                                                                                                                                                                                                                              |        |       |   |           |
| LFDRTGDGKILY                    | Similar to Myosin light polypeptide 6               | IPI00101961.1, IPI00335168.9, IPI00744444.1, IPI00789605.1, IPI00796366.1, IPI00797001.1, IPI00798146.1                                                                                                                                                                      | 0.1851 | 2.352 | 1 | 1121.595  |
| LFVDKIREYKSKRQTSGGPVDASSEYQQELE | Hypothetical protein                                | IPI00002521.1, IPI00456008.1, IPI00794158.1                                                                                                                                                                                                                                  | 0.9953 | 4.399 | 3 | 1116.5506 |
| LGNPKSDEMNVKVL                  | Isoform Non muscle of Myosin light polypeptide 6    | IPI00335168.9, IPI00413922.5, IPI00744444.1, IPI00789605.1, IPI00795576.1, IPI00796366.1, IPI00797001.1                                                                                                                                                                      | 0.9043 | 2.894 | 2 | 716.3238  |
| LIKEGDIVKRTGAIVDVPVGEELL        | ATP synthase subunit alpha, mitochondrial precursor | IPI00440493.2, IPI00471928.5, IPI00549805.3, IPI00641249.2, IPI00793125.1, IPI00795295.1, IPI00795947.1, IPI00797044.1                                                                                                                                                       | 0.1254 | 3.675 | 2 | 1169.8468 |
| LKQVHPDTGISSKAMGIMNSF           | Histone H2B type 2 E                                | IPI00440493.2, IPI00471928.5, IPI00549805.3, IPI00641249.2, IPI00793125.1, IPI00795295.1, IPI00795947.1, IPI00797044.1                                                                                                                                                       | 0.8726 | 4.652 | 2 | 1001.6564 |
| LKVTKAAGTKKQFQKF                | 40S ribosomal protein S11                           | IPI00025091.3                                                                                                                                                                                                                                                                | 1      | 3.687 | 2 | 855.5067  |
| LLTEAPLNPKANREKMTQIMF           | Actin, aortic smooth muscle                         | IPI00008603.1, IPI00021428.1, IPI00021439.1, IPI00021440.1, IPI00023006.1, IPI00025416.3, IPI00414057.2, IPI00514530.4, IPI00555733.1, IPI00555900.1, IPI00556212.1, IPI00645534.1, IPI00655798.3, IPI00736769.2, IPI00738655.2, IPI00740545.1, IPI00748022.1, IPI00816229.1 | 0.9344 | 4.007 | 2 | 1093.7962 |
| LMKNMDPLNDNIATLLHQSSDKFV        | Myosin 9                                            | IPI00019502.3, IPI00395772.4                                                                                                                                                                                                                                                 | 1      | 2.499 | 2 | 1267.4368 |
| LMVTNDGATILKNIGVDNPAAKVLV       | T complex protein 1 subunit beta                    | IPI00297779.7, IPI00796761.1                                                                                                                                                                                                                                                 | 1      | 2.749 | 2 | 1178.3738 |
| LNEASVLHNLKERY                  | Myosin 9                                            | IPI00019502.3, IPI00556012.1                                                                                                                                                                                                                                                 | 1      | 4.042 | 2 | 787.3712  |
| LPVGAANFR                       | ENO1P protein                                       | IPI00328587.4, IPI00465248.5, IPI00759806.1                                                                                                                                                                                                                                  | 0.1284 | 1.659 | 1 | 675.7557  |
| LRDSHGVAQVRF                    | 40S ribosomal protein S13                           | IPI00221089.5                                                                                                                                                                                                                                                                | 0.999  | 2.17  | 2 | 563.1154  |
| LRINKALDKTKRQGASFI              | Myosin 9                                            | IPI00019502.3, IPI00395772.4                                                                                                                                                                                                                                                 | 0.9984 | 4.037 | 2 | 917.5616  |

|                                  |                                                                   |                                                                                                                                                                     |        |       |   |           |
|----------------------------------|-------------------------------------------------------------------|---------------------------------------------------------------------------------------------------------------------------------------------------------------------|--------|-------|---|-----------|
| LRQKAEADKNDKAVKDLV               | 85 kDa protein                                                    | IPI00334775.6, IPI00414676.6, IPI00555614.1                                                                                                                         | 0.9999 | 3.034 | 2 | 915.5217  |
| LRQKAEADKNDKSVKDLV               | Heat shock protein HSP 90 alpha 2                                 | IPI00382470.3, IPI00604607.2, IPI00784295.2, IPI00789847.1                                                                                                          | 1      | 2.684 | 2 | 923.5214  |
| LRVAPEEHPVLL                     | Actin, cytoplasmic 1                                              | IPI00021439.1, IPI00021440.1, IPI00555733.1, IPI00556391.1, IPI00655798.3, IPI00739539.2, IPI00790339.1, IPI00796881.1                                              | 1      | 2.503 | 1 | 1147.3089 |
| LSGGTTMYPGIADRMQKEITALAPSTMK     | Actin, aortic smooth muscle                                       | IPI00008603.1, IPI00021428.1, IPI00021439.1, IPI00021440.1, IPI00023006.1, IPI00025416.3, IPI00414057.2, IPI00444605.1, IPI00514530.4, IPI00515047.1, IPI00794523.2 | 0.9764 | 2.781 | 2 | 909.7765  |
| LSVSEVGTQTSITTACAGTQTAVITR       | hypothetical protein LOC81610                                     | IPI00480103.3                                                                                                                                                       | 0.9439 | 3.093 | 2 | 1164.28   |
| LTLKYPIEHGIITNWDDM               | Actin, aortic smooth muscle                                       | IPI00008603.1, IPI00021428.1, IPI00023006.1, IPI00025416.3, IPI00414057.2, IPI00515047.1, IPI00645534.1, IPI00816229.1                                              | 0.993  | 3.33  | 2 | 957.9834  |
| LTNSPVELREPNVLI                  | HLA class II histocompatibility antigen, DR alpha chain precursor | IPI00005171.1, IPI00464948.3, IPI00719648.1, IPI00785143.1                                                                                                          | 0.2383 | 2.244 | 2 | 734.8222  |
| LVENGKKVKVNKDDIQKMNPPKFSKVEDMAEL | Myosin 9                                                          | IPI00019502.3, IPI00556012.1                                                                                                                                        | 0.9889 | 6.57  | 3 | 1149.9953 |
| LVRELEKKFSGKHVVFI                | 40S ribosomal protein S7                                          | IPI00013415.1, IPI00478287.2, IPI00796554.1, IPI00798077.1                                                                                                          | 0.9996 | 3.542 | 2 | 902.5678  |
| LVSKHRAQVIYTRNTKGGDAPAAGEDA      | 40S ribosomal protein S25                                         | IPI00012750.3, IPI00401105.1, IPI00740757.1                                                                                                                         | 0.0779 | 2.891 | 3 | 905.3207  |
| LVWVPSDKSGFEPASLKEEV             | Myosin 9                                                          | IPI00019502.3, IPI00556012.1                                                                                                                                        | 1      | 5.433 | 2 | 1003.6041 |
| LVWVPSDKSGFEPASLKEEVGE           | Myosin 9                                                          | IPI00019502.3, IPI00556012.1                                                                                                                                        | 0.7867 | 2.333 | 2 | 1081.6957 |
| LVWVPSDKSGFEPASLKEEVGEEAI        | Myosin 9                                                          | IPI00019502.3, IPI00556012.1                                                                                                                                        | 0.9992 | 3.664 | 2 | 1246.3494 |
| LYASGRTTGIVMDSGDVTHTVPIYEGY      | Actin, cytoplasmic 1                                              | IPI00021439.1, IPI00021440.1, IPI00794523.2, IPI00807522.1                                                                                                          | 1      | 3.361 | 2 | 1342.9636 |

|                                  |                                               |                                                                                                                                       |        |       |   |           |
|----------------------------------|-----------------------------------------------|---------------------------------------------------------------------------------------------------------------------------------------|--------|-------|---|-----------|
| LYREAPINKKGNFN                   | Similar to myosin regulatory light chain like | IPI00455715.2, IPI00740621.1                                                                                                          | 0.8289 | 3.015 | 2 | 719.3177  |
| LYREAPINKKGNFNY                  | Similar to myosin regulatory light chain like | IPI00455715.2, IPI00740621.1                                                                                                          | 0.6697 | 2.841 | 2 | 776.3692  |
| LYREAPINKKGNFNYI                 | Similar to myosin regulatory light chain like | IPI00455715.2, IPI00740621.1                                                                                                          | 0.8708 | 3.424 | 2 | 857.9563  |
| LYVDKNFINNPLAQADW                | Myosin 9                                      | IPI00019502.3, IPI00556012.1                                                                                                          | 0.9919 | 2.479 | 2 | 861.9433  |
| LYVDKNFINNPLAQADWA               | Myosin 9                                      | IPI00019502.3, IPI00556012.1                                                                                                          | 1      | 4.772 | 2 | 955.0488  |
| LYVDKNFINNPLAQADWAAKCLV          | Myosin 9                                      | IPI00019502.3, IPI00556012.1                                                                                                          | 1      | 5.235 | 2 | 1210.879  |
| MFGEKLNKGTDPEDVIRNAF             | Myosin regulatory light chain                 | IPI00033494.3, IPI00220278.5, IPI00220573.4, IPI00604523.1, IPI00642780.2                                                             | 0.9603 | 4.494 | 2 | 938.5121  |
| MFGEKLNKGTDPEDVIRNAFA            | Myosin regulatory light chain                 | IPI00021439.1, IPI00021440.1, IPI00555900.1, IPI00738655.2, IPI00739539.2, IPI00740545.1, IPI00748022.1, IPI00786945.1, IPI00794523.2 | 0.1378 | 3.288 | 2 | 1012.0995 |
| MGKVKVGVNGFGRI                   | Hypothetical protein                          | IPI00219018.7, IPI00788737.1, IPI00794605.1, IPI00795622.1                                                                            | 1      | 3.381 | 2 | 1218.4335 |
| MLQVLGPKPALPAGTEDTAKEDAANRKLAKLY | Isoform 1 of Gelsolin precursor               | IPI00026314.1, IPI00513782.3, IPI00641047.3, IPI00646773.2                                                                            | 0.0539 | 4.495 | 3 | 1039.8679 |
| MPGVTVKDVNQEF                    | 40S ribosomal protein S19                     | IPI00215780.5, IPI00787105.1                                                                                                          | 1      | 3.358 | 2 | 657.7171  |
| MVVEHPEFLKAGKEPGLQIWR            | Isoform 1 of Gelsolin precursor               | IPI00026314.1, IPI00641047.3, IPI00646773.2, IPI00647556.1                                                                            | 1      | 2.714 | 2 | 1089.7626 |
| MWISKQEYDESGPSIVHRK              | Actin, cytoplasmic 1                          | IPI00021439.1, IPI00021440.1, IPI00555900.1, IPI00738655.2, IPI00739539.2, IPI00740545.1, IPI00748022.1, IPI00786945.1, IPI00794523.2 | 1      | 5.426 | 3 | 1016.6045 |
| MWISKQEYDESGPSIVHRKC             | Actin, cytoplasmic 1                          | IPI00021439.1, IPI00021440.1, IPI00555900.1, IPI00738655.2, IPI00739539.2, IPI00740545.1, IPI00748022.1, IPI00786945.1, IPI00794523.2 | 1      | 4.847 | 3 | 1080.691  |
| MYKGKKRHEMPPHIYA                 | Myosin 9                                      | IPI00019502.3, IPI00020501.1, IPI00024870.1, IPI00395772.4, IPI00556012.1, IPI00743857.1, IPI00744256.1                               | 0.9914 | 3.037 | 2 | 893.0579  |

|                                  |                                                                     |                                                                                                                                                                                                                  |        |       |   |           |
|----------------------------------|---------------------------------------------------------------------|------------------------------------------------------------------------------------------------------------------------------------------------------------------------------------------------------------------|--------|-------|---|-----------|
| MYREAPIDKKGNFN                   | Myosin regulatory light chain 9 isoform b                           | IPI00030929.4, IPI00033494.3, IPI00220278.5, IPI00220573.4, IPI00604523.1, IPI00719669.2                                                                                                                         | 0.8947 | 2.903 | 2 | 719.81    |
| NDALINQKYDEVMATYILLGR            | Isoform 1 of Serine\threonine protein kinase MARK1                  | IPI00185037.9, IPI00292809.6, IPI00555711.1, IPI00796181.1                                                                                                                                                       | 0.3302 | 3.119 | 2 | 1086.2532 |
| NFINNPLAQADWAAKLV                | Myosin 9                                                            | IPI00019502.3, IPI00556012.1                                                                                                                                                                                     | 1      | 4.52  | 2 | 901.0442  |
| NGHVTIPGQQDKDMFQETMEAM           | Myosin 9                                                            | IPI00019502.3, IPI00395772.4                                                                                                                                                                                     | 0.3716 | 2.784 | 2 | 1132.2506 |
| NMIDQNRDGFINKEDLHDMLV            | Similar to myosin regulatory light chain like                       | IPI00455715.2, IPI00740621.1                                                                                                                                                                                     | 0.0596 | 3.058 | 2 | 1153.2922 |
| NTLPTKETIEQEKRS                  | Thymosin beta 10                                                    | IPI00220827.5                                                                                                                                                                                                    | 0.9963 | 2.826 | 2 | 787.3903  |
| NWDDMEKIWHHTFY                   | Actin, alpha skeletal muscle                                        | IPI00021428.1, IPI00021439.1, IPI00021440.1, IPI00023006.1, IPI00414057.2, IPI00515047.1, IPI00555900.1, IPI00738655.2, IPI00739539.2, IPI00740545.1, IPI00748022.1, IPI00786945.1, IPI00790339.1, IPI00796881.1 | 0.9589 | 2.432 | 2 | 822.8668  |
| QWLGSSWPGYVRPLPPAAIESPAVAAPAYSRA | Heat shock protein beta 1                                           | IPI00025512.2                                                                                                                                                                                                    | 0.9985 | 3.411 | 3 | 1075.887  |
| RDGKLVSESSDVLPK                  | Keratin, type II cytoskeletal 8                                     | IPI00554648.3                                                                                                                                                                                                    | 1      | 3.507 | 2 | 737.8229  |
| RHQGVMVGMGQKDSYVGDEAQSKRG        | Actin, aortic smooth muscle                                         | IPI00008603.1, IPI00021428.1, IPI00021439.1, IPI00021440.1, IPI00023006.1, IPI00025416.3, IPI00414057.2, IPI00514530.4, IPI00515047.1, IPI00645534.1, IPI00790339.1, IPI00796881.1                               | 1      | 4.288 | 3 | 836.9305  |
| RIKVGDRYVQKAQTKEQADF             | Myosin 9                                                            | IPI00019502.3, IPI00029818.4, IPI00337335.5, IPI00395772.4, IPI00397526.2, IPI00479307.3, IPI00607760.1, IPI00607778.1, IPI00607818.1, IPI00746736.1, IPI00790503.2, IPI00791256.1                               | 0.9959 | 3.652 | 2 | 1039.6612 |
| RMKLPKPPKPVSKMRM                 | Isoform Long of HLA class II histocompatibility antigen gamma chain | IPI00022933.2, IPI00217775.1, IPI00607573.1                                                                                                                                                                      | 0.9478 | 2.304 | 2 | 819.5661  |
| RQTVAVGVKAVDKKA                  | EEF1A1 protein                                                      | IPI00025447.7, IPI00382804.1, IPI00396485.3, IPI00472724.1                                                                                                                                                       | 0.9191 | 2.612 | 2 | 728.8816  |



|                                   |                                          |                                                                                                                                                                                    |        |       |   |           |
|-----------------------------------|------------------------------------------|------------------------------------------------------------------------------------------------------------------------------------------------------------------------------------|--------|-------|---|-----------|
| RRIVDGKVVSETNDTKV                 | 49 kDa protein                           | IPI00554788.4, IPI00737922.1, IPI00784347.2, IPI00795353.1                                                                                                                         | 0.9995 | 2.995 | 2 | 554.6178  |
| RRIVDGKVVSETNDTKVLR               | 49 kDa protein                           | IPI00554788.4, IPI00737922.1, IPI00784347.2, IPI00795353.1                                                                                                                         | 0.1571 | 2.006 | 2 | 625.3811  |
| RRIVDGKVVSETNDTKVLRH              | 49 kDa protein                           | IPI00554788.4, IPI00737922.1, IPI00784347.2, IPI00795353.1                                                                                                                         | 1      | 4.243 | 2 | 1084.2312 |
| RRLRPGTGCCHPPLPF                  | CDNA FLJ39107 fis, clone NTONG2005062    | IPI00166203.1                                                                                                                                                                      | 0.9829 | 2.445 | 2 | 747.8893  |
| RSKALKASAPAGHH                    | Mitochondrial proteolipid                | IPI00009247.2, IPI00749237.1                                                                                                                                                       | 0.9999 | 2.654 | 2 | 686.7824  |
| RSLGSVQAPSYGARPVSSAASVYAGAGGSGSRI | 49 kDa protein                           | IPI00554788.4, IPI00737922.1, IPI00784347.2, IPI00795353.1                                                                                                                         | 1      | 4.017 | 2 | 952.6907  |
| RTIEKFEKEAAEMGKG                  | Elongation factor 1 alpha 2              | IPI00014424.1, IPI00396485.3, IPI00431701.2, IPI00472724.1, IPI00641459.2, IPI00793363.1, IPI00796933.1                                                                            | 1      | 3.689 | 2 | 806.4246  |
| RTYAGGTASATKVSASSGATSKS           | Calpastatin isoform e                    | IPI00760715.1, IPI00761035.1, IPI00761069.1, IPI00761140.1, IPI00761160.1                                                                                                          | 1      | 3.509 | 2 | 952.5164  |
| RVFDKEGNGTVMGAEIRHVLV             | Non muscle of Myosin light polypeptide 6 | IPI00335168.9, IPI00413922.5, IPI00744444.1, IPI00789605.1, IPI00793089.1, IPI00795576.1, IPI00795944.1, IPI00796366.1, IPI00796500.1, IPI00797001.1, IPI00797626.1, IPI00798265.1 | 0.8595 | 4.957 | 2 | 1036.5333 |
| SGRTTGIVMDSGDGVTHTVPIYEGY         | Actin, cytoplasmic 1                     | IPI00021439.1, IPI00021440.1, IPI00555675.1, IPI00655798.3, IPI00739369.2, IPI00739539.2, IPI00748022.1, IPI00786945.1, IPI00794523.2, IPI00807522.1                               | 1      | 3.79  | 2 | 1182.2986 |
| TALAPSTMKIKIIPPERKY               | Actin, aortic smooth muscle              | IPI00008603.1, IPI00021428.1, IPI00021439.1, IPI00021440.1, IPI00023006.1, IPI00025416.3, IPI00414057.2, IPI00514530.4, IPI00515047.1, IPI00794523.2                               | 1      | 4.221 | 2 | 983.2216  |
| TALAPSTMKIKIIPPERKYS              | Actin, aortic smooth muscle              | IPI00008603.1, IPI00021428.1, IPI00021439.1, IPI00021440.1, IPI00023006.1, IPI00025416.3, IPI00414057.2, IPI00514530.4,                                                            | 1      | 4.954 | 2 | 1064.8087 |

|                           |                                                                         |                                                                                                                                       |        |       |   |           |
|---------------------------|-------------------------------------------------------------------------|---------------------------------------------------------------------------------------------------------------------------------------|--------|-------|---|-----------|
|                           |                                                                         | IPI00515047.1, IPI00794523.2                                                                                                          |        |       |   |           |
| VFQNHFEPPGVVCA            | Methionine R sulfoxide reductase                                        | IPI00014424.1, IPI00396485.3, IPI00431701.2, IPI00472724.1, IPI00641459.2, IPI00793363.1, IPI00796933.1                               | 0.1171 | 2.16  | 2 | 720.8074  |
| WISKQEYDESGPSIVHRK        | Actin, cytoplasmic 1                                                    | IPI00021439.1, IPI00021440.1, IPI00555900.1, IPI00738655.2, IPI00739539.2, IPI00740545.1, IPI00748022.1, IPI00786945.1, IPI00794523.2 | 1      | 5.62  | 2 | 923.4991  |
| WISKQEYDESGPSIVHRKC       | Actin, cytoplasmic 1                                                    | IPI00021439.1, IPI00021440.1, IPI00555900.1, IPI00738655.2, IPI00739539.2, IPI00740545.1, IPI00748022.1, IPI00786945.1, IPI00794523.2 | 1      | 4.78  | 2 | 987.5855  |
| WYARQDEQLQKTKANNRAAEEAF   | Isoform Non brain of Clathrin light chain A                             | IPI00216393.1                                                                                                                         | 0.9986 | 4.566 | 2 | 1218.3016 |
| YGNKADIISTVEFNH           | Beta isoform of regulatory subunit B55, protein phosphatase 2 isoform d | IPI00376974.1                                                                                                                         | 0.1242 | 2.363 | 2 | 704.773   |
| YIKKIGYNPDTVAF            | EEF1A1 protein                                                          | IPI00025447.7, IPI00180730.1, IPI00396485.3, IPI00472724.1, IPI00793363.1                                                             | 0.241  | 2.865 | 2 | 660.2693  |
| YLKSHHGEHERPEFI           | Cytochrome c oxidase polypeptide VIa liver, mitochondrial precursor     | IPI00021793.1, IPI00176681.1                                                                                                          | 0.9952 | 3.115 | 2 | 802.3651  |
| YPAVDPLDSTSRIMDPNIVGSEHYD | ATP synthase subunit beta, mitochondrial precursor                      | IPI00303476.1, IPI00790385.1                                                                                                          | 0.9986 | 3.63  | 2 | 1257.8803 |
| YVRPLPPAAIESPAVAAPAYSRA   | Heat shock protein beta 1                                               | IPI00025512.2                                                                                                                         | 0.9996 | 3.686 | 2 | 1067.737  |
