# Supplementary material
Source: PubMed Central journal article supplement (PMC3494186)
Supplement: supp_M112.019232_Supplemental_table_3_9-10-2011.pdf [file supp_M112.019232_Supplemental_table_3_9-10-2011.pdf]

**Supplemental Table 3.** Proteins identified from MCF10/DR7/CD80 and MCF10/DR7/CD80/li as a result of two individual affinity purifications and four LC-MS/MS runs. Proteins unique to MCF10/DR7/CD80 are in red; proteins unique to MCF10/DR7/CD80/li are in blue; proteins present in both cell lines are in black. Percent of protein coverage and number of unique peptides per protein are from Protein Prophet analysis. Spectra of proteins identified by a single peptide are in Supplemental figures 1 and 2.

| Protein                                                                                      | IPI accession number                                                                     | Peptides per protein | % Protein coverage |
|----------------------------------------------------------------------------------------------|------------------------------------------------------------------------------------------|----------------------|--------------------|
| 40S ribosomal protein S15                                                                    | IPI00216153.7, IPI00479058.1                                                             | 1                    | 14.5               |
| 60S ribosomal protein L14                                                                    | IPI00002821.4, IPI00555744.6, IPI00749269.1                                              | 1                    | 7.5                |
| Annexin A1                                                                                   | IPI00218918.5                                                                            | 1                    | 7.2                |
| Elongation factor 1 alpha 2                                                                  | IPI00478215.2                                                                            | 1                    | 4.8                |
| Isoform 3 of UDP N acetylglucosamine peptide N acetylglucosaminyltransferase 110 kDa subunit | IPI00005780.3, IPI00219856.1, IPI00607723.1                                              | 1                    | 1.6                |
| Profilin 1                                                                                   | IPI00216691.5                                                                            | 1                    | 11.4               |
| Protein S100 P                                                                               | IPI00017526.1                                                                            | 1                    | 24.2               |
| 11 kDa protein                                                                               | IPI00141795.5, IPI00177716.7, IPI00179700.3, IPI00450855.1, IPI00744851.1, IPI00746310.3 | 1                    | 19.8               |
| 117 kDa protein                                                                              | IPI00304670.6, IPI00784499.2, IPI00787751.1                                              | 1                    | 1.2                |
| 14 kDa protein                                                                               | IPI00744854.1                                                                            | 1                    | 12                 |
| 18 kDa protein                                                                               | IPI00746706.1                                                                            | 1                    | 9.5                |
| 26S protease regulatory subunit 7                                                            | IPI00021435.3                                                                            | 1                    | 3.9                |
| 40S ribosomal protein S10                                                                    | IPI00008438.1, IPI00414852.2, IPI00478810.1                                              | 3                    | 33.3               |
| 40S ribosomal protein S13                                                                    | IPI00221089.5                                                                            | 2                    | 8.6                |
| 40S ribosomal protein S15                                                                    | IPI00216153.7, IPI00479058.1                                                             | 1                    | 14.5               |
| 40S ribosomal protein S16                                                                    | IPI00221092.8                                                                            | 1                    | 11.6               |
| 40S ribosomal protein S17                                                                    | IPI00221093.7, IPI00414603.3, IPI00791157.1                                              | 1                    | 16.3               |
| 40S ribosomal protein S19                                                                    | IPI00215780.5, IPI00787105.1                                                             | 1                    | 9.7                |
| 40S ribosomal protein S2                                                                     | IPI00013485.3, IPI00478002.1, IPI00479366.1, IPI00744451.3, IPI00827598.1                | 1                    | 6.8                |
| 40S ribosomal protein S4, X isoform                                                          | IPI00217030.10, IPI00219894.5                                                            | 3                    | 23.6               |
| 40S ribosomal protein S5                                                                     | IPI00008433.4                                                                            | 3                    | 25.8               |

|                                       |                                                                                                                                                                                                   |    |      |
|---------------------------------------|---------------------------------------------------------------------------------------------------------------------------------------------------------------------------------------------------|----|------|
| 40S ribosomal protein S7              | IPI00013415.1, IPI00478287.2,<br>IPI00798077.1                                                                                                                                                    | 4  | 25.3 |
| 42 kDa protein                        | IPI00472082.2, IPI00783625.1                                                                                                                                                                      | 1  | 6.1  |
| 49 kDa protein                        | IPI00180956.6, IPI00240503.7,<br>IPI00450768.7, IPI00747707.1,<br>IPI00798387.1                                                                                                                   | 6  | 7.7  |
| 60S ribosomal protein L18             | IPI00215719.6                                                                                                                                                                                     | 1  | 6.4  |
| 60S ribosomal protein L19             | IPI00025329.1, IPI00746706.1                                                                                                                                                                      | 2  | 12.8 |
| 60S ribosomal protein L35             | IPI00412607.6, IPI00550247.2                                                                                                                                                                      | 1  | 15.4 |
| 60S ribosomal protein L4              | IPI00003918.6, IPI00792159.1                                                                                                                                                                      | 3  | 10.3 |
| 60S ribosomal protein L6              | IPI00329389.8, IPI00741742.2,<br>IPI00788908.1, IPI00790342.1,<br>IPI00798169.1                                                                                                                   | 2  | 11.8 |
| 60S ribosomal protein L7a             | IPI00299573.12,<br>IPI00397676.4, IPI00478896.2,<br>IPI00479315.2                                                                                                                                 | 1  | 6    |
| 61 kDa protein                        | IPI00472102.3, IPI00784154.1,<br>IPI00794769.1                                                                                                                                                    | 3  | 11.3 |
| 7 kDa protein                         | IPI00746213.1                                                                                                                                                                                     | 1  | 25   |
| 8 kDa protein                         | IPI00026060.2, IPI00217950.5,<br>IPI00440673.1, IPI00455586.2,<br>IPI00513867.3, IPI00741756.1                                                                                                    | 1  | 20.5 |
| 85 kDa protein                        | IPI00334775.6, IPI00382470.3,<br>IPI00414676.6, IPI00514659.2,<br>IPI00515119.3, IPI00604607.2,<br>IPI00640129.2, IPI00746291.1,<br>IPI00784295.2, IPI00789847.1,<br>IPI00796258.1, IPI00796844.1 | 1  | 2.2  |
| Actin like protein (Fragment)         | IPI00555675.1                                                                                                                                                                                     | 2  | 23.3 |
| Actin, alpha skeletal muscle          | IPI00021428.1, IPI00023006.1,<br>IPI00414057.2, IPI00515047.1                                                                                                                                     | 1  | 9.8  |
| Actin, aortic smooth muscle           | PI00008603.1, IPI00021428.1,<br>IPI00021439.1, IPI00021440.1,<br>IPI00023006.1, IPI00025416.3,<br>IPI00414057.2, IPI00514530.4,<br>IPI00515047.1, IPI00645534.1,<br>IPI00790339.1, IPI00796881.1  | 14 | 35   |
| Actin, cytoplasmic 1                  | IPI00021439.1, IPI00021440.1,<br>IPI00555733.1, IPI00556391.1,<br>IPI00655798.3, IPI00739539.2,<br>IPI00790339.1, IPI00796881.1                                                                   | 10 | 37.1 |
| Adenylyl cyclase associated protein 1 | IPI00008274.7, IPI00514858.1,<br>IPI00639931.1, IPI00641881.1,<br>IPI00642414.1, IPI00643567.1,<br>IPI00644109.1, IPI00644589.1,<br>IPI00645789.1, IPI00646269.1,<br>IPI00646869.1, IPI00647351.1 | 1  | 3.4  |

|                                                                         |                                                                                                         |   |      |
|-------------------------------------------------------------------------|---------------------------------------------------------------------------------------------------------|---|------|
| Adipose most abundant gene transcript 2                                 | IPI00020017.1, IPI00644556.2                                                                            | 1 | 26.3 |
| Alpha enolase, lung specific                                            | IPI00013769.1, IPI00216171.3, IPI00218474.5, IPI00465248.5, IPI00759806.1, IPI00792715.1                | 5 | 11.6 |
| Annexin A1                                                              | IPI00218918.5                                                                                           | 4 | 30.1 |
| Annexin A3                                                              | IPI00024095.3, IPI00745868.2                                                                            | 1 | 4.6  |
| Annexin A5                                                              | IPI00329801.12, IPI00793236.1                                                                           | 1 | 5.2  |
| Aspartyl tRNA synthetase, cytoplasmic                                   | IPI00216951.2                                                                                           | 1 | 4    |
| ATP synthase epsilon chain, mitochondrial                               | IPI00215878.6                                                                                           | 1 | 41.2 |
| ATP synthase subunit beta, mitochondrial precursor                      | IPI00303476.1, IPI00792128.1, IPI00792534.1, IPI00793851.1                                              | 2 | 5.9  |
| Bardet Biedl syndrome 10 protein                                        | IPI00742775.1                                                                                           | 1 | 3.5  |
| Brain acid soluble protein 1                                            | IPI00299024.9                                                                                           | 2 | 20.3 |
| C 1 tetrahydrofolate synthase, cytoplasmic                              | IPI00218342.10, IPI00794900.1                                                                           | 2 | 2.7  |
| Calcineurin binding protein Cabin 1                                     | IPI00002355.1, IPI00184409.6                                                                            | 1 | 0.8  |
| CDNA FLJ90577 fis, clone OVARC1002058, highly similar to Human 18S rRNA | IPI00384007.1                                                                                           | 1 | 22.8 |
| Cell death inducing DFFA like effector a isoform 2                      | IPI00384386.4, IPI00646443.1                                                                            | 1 | 5.1  |
| Centrosomal protein 55kDa                                               | IPI00478215.2                                                                                           | 1 | 4.8  |
| Chromogranin A precursor                                                | IPI00290315.3, IPI00383975.1, IPI00746813.1                                                             | 1 | 4.6  |
| Coactosin like protein                                                  | IPI00017704.3                                                                                           | 1 | 13.4 |
| Cofilin 1                                                               | IPI00012011.6, IPI00413344.3, IPI00784459.1, IPI00796024.1                                              | 1 | 9    |
| Cyclin dependent kinase 10 isoform 3 variant (Fragment)                 | IPI00556339.1                                                                                           | 1 | 7.9  |
| Cytochrome c oxidase polypeptide VIa liver, mitochondrial precursor     | IPI00021793.1, IPI00176681.1                                                                            | 1 |      |
| D 3 phosphoglycerate dehydrogenase                                      | IPI00011200.5, IPI00642548.2                                                                            | 3 | 12   |
| Dpy 30 like protein                                                     | IPI00028109.1                                                                                           | 1 | 12.1 |
| E2 induced gene 5 protein                                               | IPI00023001.2, IPI00795180.1                                                                            | 1 | 11.7 |
| EEF1A1 protein                                                          | IPI00025447.7, IPI00180730.1, IPI00396485.3, IPI00455434.1, IPI00472724.1, IPI00655692.1, IPI00793363.1 | 8 | 48.1 |
| Elongation factor 1 alpha 2                                             | IPI00014424.1, IPI00180730.1,                                                                           | 3 | 12.3 |

|                                                                   |                                                                                                                                                                                                                                     |    |      |
|-------------------------------------------------------------------|-------------------------------------------------------------------------------------------------------------------------------------------------------------------------------------------------------------------------------------|----|------|
|                                                                   | IPI00396485.3, IPI00472724.1,<br>IPI00556204.1, IPI00641459.2,<br>IPI00793363.1, IPI00796933.1                                                                                                                                      |    |      |
| Elongation factor 2                                               | IPI00186290.6                                                                                                                                                                                                                       | 1  | 1.5  |
| ENO1P protein                                                     | IPI00328587.4, IPI00465248.5,<br>IPI00759806.1                                                                                                                                                                                      | 2  | 4.6  |
| Eukaryotic translation initiation factor 3 subunit 12             | IPI00033143.1                                                                                                                                                                                                                       | 1  | 7.3  |
| FKSG30                                                            | IPI00555900.1                                                                                                                                                                                                                       | 1  | 4.8  |
| Fructose biphosphate aldolase C                                   | IPI00418262.4                                                                                                                                                                                                                       | 1  | 7.7  |
| Fucosyltransferase 11                                             | IPI00217759.2, IPI00647266.1                                                                                                                                                                                                        | 1  | 3.7  |
| Galectin 1                                                        | IPI00219219.3                                                                                                                                                                                                                       | 1  | 9.6  |
| Glyceraldehyde-3-phosphate dehydrogenase                          | IPI00219018.7                                                                                                                                                                                                                       | 17 | 41.8 |
| Heat shock protein beta 1                                         | IPI00025512.2                                                                                                                                                                                                                       | 1  | 15.1 |
| Heat shock protein HSP 90 alpha 2                                 | IPI00382470.3, IPI00604607.2,<br>IPI00784295.2, IPI00789847.1                                                                                                                                                                       | 1  | 1.9  |
| Histone H2B type 2 E                                              | IPI00003935.6, IPI00018534.4,<br>IPI00020101.9, IPI00152785.3,<br>IPI00152906.6, IPI00166293.5,<br>IPI00220403.3, IPI00303133.8,<br>IPI00329665.8, IPI00419833.7,<br>IPI00465363.3, IPI00477495.3,<br>IPI00515061.3, IPI00554798.2, | 2  | 15.9 |
| HLA class II histocompatibility antigen, DR alpha chain precursor | IPI00005171.1, IPI00464948.3,<br>IPI00645572.1, IPI00647215.2,<br>IPI00785143.1                                                                                                                                                     | 2  | 9.8  |
| HSPA5 protein                                                     | IPI00003362.2                                                                                                                                                                                                                       | 1  | 2.6  |
| Hypothetical poetin                                               | IPI00219018.7, IPI00788737.1,<br>IPI00789134.1, IPI00793922.1,<br>IPI00795257.1, IPI00797221.1                                                                                                                                      | 1  | 9.36 |
| Hypothetical protein DKFZp761C0417                                | IPI00470378.1                                                                                                                                                                                                                       | 1  | 3.5  |
| Hypothetical protein DKFZp781J1697                                | IPI00470809.3                                                                                                                                                                                                                       | 1  | 1    |
| hypothetical protein isoform 1                                    | IPI00788693.1                                                                                                                                                                                                                       | 1  | 17.6 |
| hypothetical protein isoform 2                                    | IPI00807617.1                                                                                                                                                                                                                       | 1  | 12.2 |
| hypothetical protein LOC25900 isoform 4                           | IPI00022868.3, IPI00449478.4,<br>IPI00787448.2                                                                                                                                                                                      | 1  | 4.1  |
| hypothetical protein LOC283971                                    | IPI00396078.4, IPI00448073.2,<br>IPI00456692.3                                                                                                                                                                                      | 1  | 3.8  |
| Hypothetical protein LOC345651                                    | IPI00003269.1, IPI00008603.1,<br>IPI00021428.1, IPI00021439.1,<br>IPI00021440.1, IPI00023006.1,<br>IPI00025416.3, IPI00514530.4,                                                                                                    | 1  | 4.8  |

|                                                                           |                                                                                                                                                                                                                     |   |      |
|---------------------------------------------------------------------------|---------------------------------------------------------------------------------------------------------------------------------------------------------------------------------------------------------------------|---|------|
|                                                                           | IPI00515047.1, IPI00555900.1,<br>IPI00739539.2, IPI00794523.2,<br>IPI00816229.1                                                                                                                                     |   |      |
| interleukin 1 receptor associated<br>kinase 1 isoform 3                   | IPI00060149.2, IPI00293652.1,<br>IPI00385328.2, IPI00472717.1                                                                                                                                                       | 1 | 3.5  |
| Intestinal facilitative glucose<br>transporter 7                          | IPI00057815.4                                                                                                                                                                                                       | 1 | 2.7  |
| Isoform 1 of 14 3 3 protein<br>sigma                                      | IPI00013890.2, IPI00018146.1,<br>IPI00021263.3, IPI00216318.5,<br>IPI00216319.3, IPI00220642.7,<br>IPI00411765.3, IPI00743599.1,<br>IPI00759832.1, IPI00789337.1,<br>IPI00790768.1, IPI00794254.2,<br>IPI00796727.1 | 1 | 8.1  |
| Isoform 1 of Disks large<br>associated protein 1                          | IPI00021941.1, IPI00792913.1                                                                                                                                                                                        | 1 |      |
| Isoform 1 of Heat shock cognate<br>71 kDa protein                         | IPI00003865.1, IPI00037070.2,<br>IPI00792459.1, IPI00793644.1,<br>IPI00794277.1, IPI00795040.1,<br>IPI00797523.1                                                                                                    | 2 | 6.8  |
| Isoform 1 of Kin of IRRE like<br>protein 1 precursor                      | IPI00470360.1, IPI00470361.1                                                                                                                                                                                        | 1 | 2.9  |
| Isoform 1 of L lactate<br>dehydrogenase A chain                           | IPI00217966.7, IPI00607708.3,<br>IPI00789874.1, IPI00792016.1,<br>IPI00792520.1, IPI00793152.1,<br>IPI00795075.1                                                                                                    | 6 | 29.2 |
| Isoform 1 of Nucleolar protein 6                                          | IPI00152890.1, IPI00157845.3,<br>IPI00291903.4, IPI00556218.1                                                                                                                                                       | 1 | 1.7  |
| Isoform 1 of Nucleophosmin                                                | IPI00549248.4, IPI00604504.1,<br>IPI00658013.1                                                                                                                                                                      | 1 | 4.8  |
| Isoform 1 of PHD finger protein<br>21B                                    | IPI00738578.1                                                                                                                                                                                                       | 1 | 4.5  |
| Isoform 1 of Plectin 1                                                    | IPI00014898.1, IPI00186711.3,<br>IPI00215942.1, IPI00215943.1,<br>IPI00398002.5, IPI00398775.3,<br>IPI00398776.3, IPI00398777.3,<br>IPI00398778.3, IPI00398779.3,<br>IPI00420096.4                                  | 1 | 0.3  |
| Isoform 1 of Polypyrimidine tract<br>binding protein 1                    | IPI00179964.5, IPI00183626.8,<br>IPI00334175.3, IPI00556157.1                                                                                                                                                       | 1 | 3    |
| Isoform 1 of RING and PHD<br>finger domain containing protein<br>KIAA1542 | IPI00001813.5, IPI00827706.1                                                                                                                                                                                        | 1 | 1.2  |
| Isoform 1 of Serine\threonine<br>protein kinase MARK1                     | IPI00185037.9, IPI00292809.6,<br>IPI00555711.1, IPI00796181.1                                                                                                                                                       | 1 | 2.4  |
| Isoform 1 of Unc 13 homolog D                                             | IPI00456635.1                                                                                                                                                                                                       | 1 | 2.7  |

|                                                                     |                                                                                                                                                                                    |   |      |
|---------------------------------------------------------------------|------------------------------------------------------------------------------------------------------------------------------------------------------------------------------------|---|------|
| Isoform 2 of Calpastatin                                            | IPI00220857.3, IPI00220859.3, IPI00305750.4, IPI00413492.3, IPI00465148.2, IPI00760715.1, IPI00760909.2, IPI00761035.1, IPI00761069.1, IPI00761140.1, IPI00761160.1                | 1 | 2.3  |
| Isoform 2 of Nucleophosmin                                          | IPI00220740.1, IPI00549248.4                                                                                                                                                       | 2 | 10.6 |
| Isoform 2 of Plakophilin 2                                          | IPI00005264.1, IPI00219688.1                                                                                                                                                       | 1 | 2.3  |
| Isoform 2 of Triosephosphate isomerase                              | IPI00451401.3, IPI00465028.7, IPI00746832.1, IPI00796633.1, IPI00797687.1                                                                                                          | 1 | 9.2  |
| Isoform 7 of Protocadherin 11 X linked precursor                    | IPI00005031.1, IPI00018303.2, IPI00018313.1, IPI00018320.1, IPI00104649.1, IPI00218387.1, IPI00410049.2, IPI00514303.1, IPI00514457.3, IPI00643227.1, IPI00745536.1, IPI00747762.1 | 1 | 1.8  |
| Isoform alpha enolase of Alpha enolase                              | IPI00465248.5, IPI00759806.1                                                                                                                                                       | 7 | 25.1 |
| Isoform Alpha of Tripartite motif containing protein 1              | IPI00009524.3, IPI00216582.3                                                                                                                                                       | 1 | 2.9  |
| Isoform Brain of Clathrin light chain A                             | IPI00014587.1, IPI00216393.1, IPI00790571.1                                                                                                                                        | 1 | 6    |
| Isoform HMG I of High mobility group protein HMG I\HMG Y            | IPI00179700.3, IPI00744851.1, IPI00746310.3                                                                                                                                        | 1 | 23.4 |
| Isoform Long of HLA class II histocompatibility antigen gamma chain | IPI00022933.2, IPI00217775.1, IPI00607573.1                                                                                                                                        | 2 | 6.1  |
| Isoform Long of Proto oncogene tyrosine protein kinase LCK          | IPI00394952.5, IPI00411413.2, IPI00515097.3, IPI00555672.1                                                                                                                         | 1 | 3.3  |
| Isoform M1 of Pyruvate kinase isozymes M1\M2                        | IPI00220644.8, IPI00479186.5, IPI00604528.2, IPI00783061.1, IPI00784179.1                                                                                                          | 2 | 6.8  |
| Isoform Non brain of Clathrin light chain A                         | IPI00216393.1                                                                                                                                                                      | 1 | 9.6  |
| Isoform Non muscle of Myosin light polypeptide 6                    | IPI00335168.9, IPI00413922.5, IPI00744444.1, IPI00789605.1, IPI00793089.1, IPI00795576.1, IPI00795944.1, IPI00796366.1, IPI00796500.1, IPI00797001.1, IPI00797626.1, IPI00798265.1 | 1 | 11.3 |
| Keratin 77                                                          | IPI00376379.3                                                                                                                                                                      | 1 | 1.9  |
| Keratin, type I cytoskeletal 15                                     | IPI00290077.1                                                                                                                                                                      | 3 | 18.2 |
| Keratin, type II cytoskeletal 6B                                    | IPI00293665.7                                                                                                                                                                      | 1 | 4.6  |
| Keratin, type II cytoskeletal 8                                     | IPI00554648.3                                                                                                                                                                      | 2 | 6.4  |
| L lactate dehydrogenase B chain                                     | IPI00219217.3, IPI00788938.1, IPI00789173.1, IPI00789771.1,                                                                                                                        | 3 | 6.3  |

|                                                                                |                                                                                                                                                                     |    |      |
|--------------------------------------------------------------------------------|---------------------------------------------------------------------------------------------------------------------------------------------------------------------|----|------|
|                                                                                | IPI00797561.1                                                                                                                                                       |    |      |
| Leukemia inhibitory factor precursor                                           | IPI00009720.1                                                                                                                                                       | 1  | 9.4  |
| Myosin 9                                                                       | IPI00019502.3, IPI00556012.1                                                                                                                                        | 1  | 0.9  |
| NADH dehydrogenase [ubiquinone] iron sulfur protein 2, mitochondrial precursor | IPI00025239.2                                                                                                                                                       | 1  | 4.8  |
| NLRC5 protein, IFN-specific response element                                   | IPI00329085.2, IPI00335249.1, IPI00383061.3, IPI00641739.1, IPI00789837.1                                                                                           | 1  | 1.5  |
| Nucleoside diphosphate kinase A                                                | IPI00012048.1, IPI00026260.1, IPI00375531.2, IPI00604590.3, IPI00789423.1, IPI00790982.1, IPI00794728.1, IPI00795292.1, IPI00796344.1, IPI00797082.1, IPI00798187.1 | 1  | 13.2 |
| Peptidyl prolyl cis trans isomerase A                                          | IPI00419585.9, IPI00743250.1                                                                                                                                        | 1  | 7.3  |
| Peroxisomal membrane protein 2                                                 | IPI00221002.5, IPI00787173.1, IPI00796440.1                                                                                                                         | 1  | 11.3 |
| Phosphoglycerate kinase 1                                                      | IPI00169383.3                                                                                                                                                       | 1  | 5.3  |
| Polyadenylate binding protein interacting protein 2                            | IPI00304483.1                                                                                                                                                       | 1  | 13.4 |
| PP856                                                                          | IPI00165579.6, IPI00177728.3, IPI00642656.2, IPI00642792.1, IPI00643827.1, IPI00646632.2                                                                            | 1  | 3.8  |
| Profilin 1                                                                     | IPI00216691.5                                                                                                                                                       | 1  | 15.7 |
| Proteasome activator complex subunit 2                                         | IPI00384051.5, IPI00398048.1, IPI00746205.1                                                                                                                         | 1  | 5.4  |
| Protein S100 A10                                                               | IPI00183695.9                                                                                                                                                       | 4  | 23.7 |
| Protein S100 A11                                                               | IPI00013895.1                                                                                                                                                       | 3  | 41.9 |
| Protein S100 A16                                                               | IPI00062120.1                                                                                                                                                       | 1  | 20.4 |
| Protein S100 A2                                                                | IPI00019869.3, IPI00514806.1                                                                                                                                        | 4  | 27.6 |
| Protein S100 A6                                                                | IPI00027463.1                                                                                                                                                       | 9  | 62.2 |
| Protein tyrosine phosphatase epsilon cytoplasmic isoform (Fragment)            | IPI00816740.1                                                                                                                                                       | 1  | 51.8 |
| Putative S100 calcium binding protein H_NH0456N16.1                            | IPI00003734.1, IPI00013895.1, IPI00787797.1                                                                                                                         | 2  | 12.5 |
| similar to agrin                                                               | IPI00786877.1                                                                                                                                                       | 1  | 0.5  |
| Similar to annexin A2 isoform 1                                                | IPI00334627.3, IPI00418169.3, IPI00455315.4, IPI00797556.1                                                                                                          | 10 | 45.7 |
| Similar to Calgizzarin                                                         | IPI00743214.1                                                                                                                                                       | 1  | 19.2 |
| similar to Keratin, type II cytoskeletal 8                                     | IPI00215804.4, IPI00554648.3, IPI00787216.1, IPI00787323.1, IPI00787392.1, IPI00793917.1                                                                            | 1  | 8.9  |

|                                                                                                                                 |                                                                                                                                                                                                                       |   |      |
|---------------------------------------------------------------------------------------------------------------------------------|-----------------------------------------------------------------------------------------------------------------------------------------------------------------------------------------------------------------------|---|------|
| similar to Nonhistone chromosomal protein HMG 17 (High mobility group nucleosome binding domain containing protein 2) isoform 3 | IPI00181126.3, IPI00217950.5, IPI00478470.1, IPI00787782.1                                                                                                                                                            | 2 | 37.8 |
| similar to peptidylprolyl isomerase A isoform 1                                                                                 | IPI00248321.8, IPI00374732.4, IPI00419585.9, IPI00472718.3, IPI00745933.1                                                                                                                                             | 1 | 14.5 |
| Similar to Zinc finger CCCH type domain containing protein 11A isoform 1                                                        | IPI00455725.3                                                                                                                                                                                                         | 1 | 2.9  |
| Stathmin                                                                                                                        | IPI00479997.4                                                                                                                                                                                                         | 1 | 8.7  |
| Thymosin beta 10                                                                                                                | IPI00220827.5                                                                                                                                                                                                         | 5 | 52.3 |
| thymosin like 3                                                                                                                 | IPI00180240.2, IPI00220828.9, IPI00719405.2, IPI00815642.1, IPI00815829.1, IPI00815835.1, IPI00816008.1, IPI00816288.1, IPI00816464.1                                                                                 | 6 | 61.4 |
| Transketolase                                                                                                                   | IPI00643920.2, IPI00788802.1, IPI00789310.1, IPI00792641.1, IPI00793119.1                                                                                                                                             | 2 | 3.4  |
| Tropomodulin-1                                                                                                                  | IPI00002375.3                                                                                                                                                                                                         | 1 | 7    |
| Tubulin beta 2C chain                                                                                                           | IPI00007752.1, IPI00011654.2, IPI00013475.1, IPI00013683.2, IPI00023598.2, IPI00031370.3, IPI00152453.1, IPI00640115.1, IPI00641706.1, IPI00643158.1, IPI00644620.1, IPI00645452.1, IPI00646779.2, IPI00647682.2, IPI | 1 | 2.2  |
| Ubiquitin conjugating enzyme E2 L3                                                                                              | IPI00021347.1, IPI00176873.2, IPI00472476.1                                                                                                                                                                           | 1 | 13.6 |
| Vimentin                                                                                                                        | IPI00418471.6                                                                                                                                                                                                         | 1 | 2.8  |
| Zinc finger protein 615                                                                                                         | IPI00418568.3, IPI00644529.1, IPI00748237.1, IPI00798052.1                                                                                                                                                            | 1 | 3.6  |
