# Supplementary material
Source: PubMed Central journal article supplement (PMC3494186)
Supplement: supp_M112.019232_Supplemental_table_4_9-10-2012.pdf [file supp_M112.019232_Supplemental_table_4_9-10-2012.pdf]

**Supplemental Table 4.** Proteins identified from MCF10/CIITA/CD80 and MCF10/CIITA/CD80/siRNA as a result of two individual affinity purifications and four LC-MS/MS runs. Proteins unique to MCF10/CIITA/CD80/siRNA are in **red**; proteins unique to MCF10/CIITA/CD80 are in **blue**; proteins present in both cell lines are in black. Percent of protein coverage and number of unique peptides per protein are from Protein Prophet analysis. Spectra of proteins identified by a single peptide are in Supplemental figure 3.

| Protein Name                                       | IPI accession number                                                                                                                                                                                                                                           | Peptides per protein | % Protein coverage |
|----------------------------------------------------|----------------------------------------------------------------------------------------------------------------------------------------------------------------------------------------------------------------------------------------------------------------|----------------------|--------------------|
| ATP synthase subunit beta, mitochondrial precursor | IPI00303476.1, IPI00789157.1, IPI00790385.1, IPI00792128.1, IPI00792534.1                                                                                                                                                                                      | 1                    | 4                  |
| Heat shock protein beta 1                          | IPI00025512.2                                                                                                                                                                                                                                                  | 1                    | 15.1               |
| 40S ribosomal protein S11                          | IPI00025091.3                                                                                                                                                                                                                                                  | 1                    | 9.5                |
| 40S ribosomal protein S13                          | IPI00221089.5                                                                                                                                                                                                                                                  | 1                    | 6.6                |
| 40S ribosomal protein S15                          | IPI00216153.7, IPI00479058.1                                                                                                                                                                                                                                   | 2                    | 35.2               |
| 40S ribosomal protein S19                          | IPI00215780.5, IPI00787105.1                                                                                                                                                                                                                                   | 1                    | 8.3                |
| 40S ribosomal protein S2                           | IPI00013485.3, IPI00478002.1, IPI00479366.1, IPI00744451.3, IPI00827598.1                                                                                                                                                                                      | 1                    | 6.1                |
| 40S ribosomal protein S25                          | IPI00012750.3, IPI00401105.1, IPI00740757.1                                                                                                                                                                                                                    | 1                    | 20.8               |
| 40S ribosomal protein S5                           | IPI00008433.4, IPI00479705.2                                                                                                                                                                                                                                   | 1                    | 5.9                |
| 40S ribosomal protein S7                           | IPI00013415.1, IPI00478287.2                                                                                                                                                                                                                                   | 2                    | 18                 |
| 49 kDa protein                                     | IPI00554788.4, IPI00737922.1, IPI00784347.2, IPI00795353.1                                                                                                                                                                                                     | 6                    | 11.4               |
| 60S ribosomal protein L7a                          | IPI00299573.12, IPI00397676.4, IPI00478896.2, IPI00479315.2                                                                                                                                                                                                    | 1                    | 6                  |
| 7 kDa protein                                      | IPI00746213.1                                                                                                                                                                                                                                                  | 1                    | 25                 |
| 85 kDa protein                                     | IPI00334775.6, IPI00414676.6, IPI00555614.1                                                                                                                                                                                                                    | 1                    | 2.4                |
| Actin, alpha skeletal muscle                       | IPI00021428.1, IPI00021439.1, IPI00021440.1, IPI00023006.1, IPI00414057.2, IPI00515047.1, IPI00555900.1, IPI00738655.2, IPI00739539.2, IPI00740545.1, IPI00748022.1, IPI00786945.1, IPI00790339.1, IPI00796881.1                                               | 1                    | 3.7                |
| Actin, aortic smooth muscle                        | IPI00008603.1, IPI00021428.1, IPI00021439.1, IPI00021440.1, IPI00023006.1, IPI00025416.3, IPI00414057.2, IPI00514530.4, IPI00555733.1, IPI00555900.1, IPI00556212.1, IPI00645534.1, IPI00655798.3, IPI00736769.2, IPI00738655.2, IPI00740545.1, IPI00748022.1, | 6                    | 19.6               |

|                                                                         |                                                                                                                        |   |      |
|-------------------------------------------------------------------------|------------------------------------------------------------------------------------------------------------------------|---|------|
| Actin, cytoplasmic 1                                                    | IPI00021439.1, IPI00021440.1, IPI00555733.1, IPI00556391.1, IPI00655798.3, IPI00739539.2, IPI00790339.1, IPI00796881.1 | 9 | 30.7 |
| Alpha enolase, lung specific                                            | IPI00013769.1, IPI00216171.3, IPI00218474.5, IPI00465248.5, IPI00759806.1, IPI00792715.1                               | 1 | 3.9  |
| ATP synthase epsilon chain, mitochondrial                               | IPI00215878.6                                                                                                          | 1 | 41.2 |
| ATP synthase O subunit, mitochondrial precursor                         | IPI00007611.1, IPI00789135.1                                                                                           | 1 | 9.4  |
| ATP synthase subunit alpha, mitochondrial precursor                     | IPI00440493.2, IPI00471928.5, IPI00549805.3, IPI00641249.2, IPI00793125.1, IPI00795295.1, IPI00795947.1, IPI00797044.1 | 1 | 4.5  |
| ATP synthase subunit beta, mitochondrial precursor                      | IPI00303476.1, IPI00792128.1, IPI00792534.1, IPI00793851.1                                                             | 2 | 6.8  |
| Beta isoform of regulatory subunit B55, protein phosphatase 2 isoform d | IPI00376974.1                                                                                                          | 1 | 3    |
| Brain specific angiogenesis inhibitor 3 precursor                       | IPI00028448.1                                                                                                          | 1 | 1.7  |
| Calpastatin isoform e                                                   | IPI00760715.1, IPI00761035.1, IPI00761069.1, IPI00761140.1, IPI00761160.1                                              | 1 | 3    |
| CDNA FLJ39107 fis, clone NTONG2005062                                   | IPI00166203.1                                                                                                          | 1 | 11.1 |
| Cytochrome c oxidase polypeptide VIa liver, mitochondrial precursor     | IPI00021793.1, IPI00176681.1                                                                                           | 1 | 11.9 |
| Cytochrome c type heme lyase                                            | IPI00023406.1                                                                                                          | 1 | 5.2  |
| E2 induced gene 5 protein                                               | IPI00023001.2                                                                                                          | 1 | 9.7  |
| EEF1A1 protein                                                          | IPI00025447.7, IPI00396485.3, IPI00472724.1, IPI00793363.1                                                             | 3 | 13.3 |
| Elongation factor 1 alpha 2                                             | IPI00014424.1, IPI00396485.3, IPI00431701.2, IPI00472724.1, IPI00641459.2, IPI00793363.1, IPI00796933.1                | 1 | 3.7  |
| ENO1P protein                                                           | IPI00328587.4, IPI00465248.5, IPI00759806.1                                                                            | 1 | 2.3  |
| Gelsolin precursor                                                      | IPI00026314.1, IPI00513782.3, IPI00646773.2                                                                            | 1 | 4.2  |
| Heat shock protein beta 1                                               | IPI00025512.2                                                                                                          | 1 | 15.1 |
| Heat shock protein HSP 90 alpha 2                                       | IPI00382470.3, IPI00604607.2, IPI00784295.2, IPI00789847.1                                                             | 1 | 2.1  |
| Histone H2B type 2 E                                                    | IPI00440493.2, IPI00471928.5, IPI00549805.3, IPI00641249.2, IPI00793125.1, IPI00795295.1, IPI00795947.1, IPI00797044.1 | 1 | 12   |
| HLA class II histocompatibility antigen, DR alpha chain precursor       | IPI00005171.1, IPI00464948.3, IPI00719648.1, IPI00785143.1                                                             | 1 | 5.9  |

|                                                                     |                                                                                                                                                                                                                                                                     |    |      |
|---------------------------------------------------------------------|---------------------------------------------------------------------------------------------------------------------------------------------------------------------------------------------------------------------------------------------------------------------|----|------|
| Hypothetical protein                                                | IPI00176527.1                                                                                                                                                                                                                                                       | 1  | 41.2 |
| hypothetical protein LOC81610                                       | IPI00480103.3                                                                                                                                                                                                                                                       | 1  | 3.9  |
| Interleukin 20 precursor                                            | IPI00000048.2                                                                                                                                                                                                                                                       | 1  | 10.8 |
| Isoform 1 of Gelsolin precursor                                     | IPI00026314.1, IPI00513782.3,<br>IPI00646773.2                                                                                                                                                                                                                      | 3  | 7.7  |
| Isoform 1 of L lactate dehydrogenase A chain                        | IPI00217966.7, IPI00607708.3,<br>IPI00789874.1, IPI00792016.1,<br>IPI00792520.1, IPI00793152.1,<br>IPI00795075.1                                                                                                                                                    | 2  | 6.3  |
| Isoform 1 of Nucleophosmin                                          | IPI00549248.4, IPI00604504.1,<br>IPI00658013.1                                                                                                                                                                                                                      | 1  | 1.4  |
| Isoform 1 of Serine\threonine protein kinase MARK1                  | IPI00185037.9, IPI00292809.6,<br>IPI00555711.1, IPI00796181.1                                                                                                                                                                                                       | 1  | 2.4  |
| Isoform alpha enolase of Alpha enolase                              | IPI00465248.5, IPI00759806.1                                                                                                                                                                                                                                        | 2  | 8.8  |
| Isoform Long of HLA class II histocompatibility antigen gamma chain | IPI00022933.2, IPI00217775.1,<br>IPI00607573.1                                                                                                                                                                                                                      | 1  | 4.7  |
| Isoform Non brain of Clathrin light chain A                         | IPI00216393.1                                                                                                                                                                                                                                                       | 1  | 9.6  |
| Isoform Non muscle of Myosin light polypeptide 6                    | IPI00335168.9, IPI00413922.5,<br>IPI00744444.1, IPI00789605.1,<br>IPI00793089.1, IPI00795576.1,<br>IPI00795944.1, IPI00796366.1,<br>IPI00796500.1, IPI00797001.1,<br>IPI00797626.1, IPI00798265.1                                                                   | 2  | 15.9 |
| Keratin, type II cytoskeletal 8                                     | IPI00554648.3                                                                                                                                                                                                                                                       | 1  | 3.1  |
| Lon protease homolog, mitochondrial precursor                       | IPI00005158.1, IPI00334291.7                                                                                                                                                                                                                                        | 1  | 1.6  |
| Methionine R sulfoxide reductase                                    | IPI00021576.4, IPI00797026.1                                                                                                                                                                                                                                        | 1  | 11.3 |
| Mitochondrial proteolipid                                           | IPI00009247.2, IPI00749237.1                                                                                                                                                                                                                                        | 1  | 18.7 |
| Myosin 9                                                            | IPI00019502.3, IPI00020501.1,<br>IPI00024870.1, IPI00029818.4,<br>IPI00337335.5, IPI00395772.4,<br>IPI00397526.2, IPI00479307.3,<br>IPI00607760.1, IPI00607778.1,<br>IPI00607818.1, IPI00743857.1,<br>IPI00744256.1, IPI00746736.1,<br>IPI00790503.2, IPI00791256.1 | 24 | 19.4 |
| Myosin light polypeptide 6B                                         | IPI00027255.1, IPI00335168.9,<br>IPI00744444.1, IPI00789605.1,<br>IPI00796366.1, IPI00797001.1,<br>IPI00798146.1                                                                                                                                                    | 1  | 7.2  |
| Myosin regulatory light chain                                       | IPI00033494.3, IPI00220278.5,<br>IPI00220573.4, IPI00604523.1,<br>IPI00642780.2                                                                                                                                                                                     | 2  | 15.1 |
| myosin regulatory light chain 9 isoform b                           | IPI00030929.4, IPI00033494.3,<br>IPI00220278.5, IPI00220573.4,<br>IPI00604523.1, IPI00719669.2                                                                                                                                                                      | 3  | 22   |
| Neuroblast differentiation associated                               | IPI00021812.1, IPI00555610.3                                                                                                                                                                                                                                        | 1  | 0.8  |

|                                                                                     |                                                                                                                                                                                                   |   |      |
|-------------------------------------------------------------------------------------|---------------------------------------------------------------------------------------------------------------------------------------------------------------------------------------------------|---|------|
| protein AHNAK (Fragment)                                                            |                                                                                                                                                                                                   |   |      |
| Non muscle of Myosin light polypeptide 6                                            | IPI00335168.9, IPI00413922.5, IPI00744444.1, IPI00789605.1, IPI00793089.1, IPI00795576.1, IPI00795944.1, IPI00796366.1, IPI00796500.1, IPI00797001.1, IPI00797626.1, IPI00798265.1                | 1 | 12.6 |
| Nucleophosmin                                                                       | IPI00220740.1, IPI00549248.4, IPI00658013.1                                                                                                                                                       | 1 | 6.4  |
| Polyadenylate binding protein interacting protein 2                                 | IPI00304483.1                                                                                                                                                                                     | 1 | 13.4 |
| PQ loop repeat containing 2 isoform 1                                               | IPI00643251.2, IPI00748068.1, IPI00827572.1                                                                                                                                                       | 1 | 6.9  |
| Protocadherin 11 X linked precursor                                                 | IPI00005031.1, IPI00018303.2, IPI00018313.1, IPI00018320.1, IPI00104649.1, IPI00218387.1, IPI00410049.2, IPI00514303.1, IPI00514457.3, IPI00643227.1, IPI00745536.1, IPI00747762.1                | 1 | 1.8  |
| RING finger and transmembrane domain-containing protein 2 isoform 2                 | IPI00797961; IPI00877637; IPI00878447;                                                                                                                                                            | 1 | 5.6  |
| Similar to Myosin light polypeptide 6 similar to myosin regulatory light chain like | IPI00101961.1, IPI00335168.9, IPI00744444.1, IPI00789605.1, IPI00796366.1, IPI00797001.1, IPI00798146.1                                                                                           | 1 | 6.6  |
| T complex protein 1 subunit beta                                                    | IPI00455715.2, IPI00740621.1                                                                                                                                                                      | 5 | 19   |
| Thymosin beta 10                                                                    | IPI00297779.7, IPI00796761.1                                                                                                                                                                      | 1 | 4.3  |
| Thymosin like 3                                                                     | IPI00220827.5                                                                                                                                                                                     | 3 | 52.3 |
| Tropomodulin 1                                                                      | IPI00180240.2, IPI00220828.9, IPI00719405.2, IPI00815642.1, IPI00815829.1, IPI00815835.1, IPI00816008.1, IPI00816288.1, IPI00816464.1                                                             | 2 | 61.4 |
| TUBA6 protein                                                                       | IPI00166768.2, IPI00179709.4, IPI00180675.4, IPI00218343.4, IPI00218345.4, IPI00387144.4, IPI00410402.2, IPI00478908.3, IPI00552356.1, IPI00743604.1, IPI00792677.1, IPI00793930.1, IPI00795002.1 | 1 | 5.2  |
